# Supplementary material for: Additions to the knowledge of Nevada carabid beetles (Coleoptera: Carabidae) and a preliminary list of carabids from the Great Basin National Park
Source: Biodivers Data J. 2017 Jun 13;(5):e12250. doi: 10.3897/BDJ.5.e12250 (PMC5515070; doi:10.3897/BDJ.5.e12250)
Supplement: Supplementary material 1 — Occurence data for new state records and GBNP records for carabids of Nevada [file bdj-05-e12250-s001.csv]

id	modified	rights	accessRights	references	institutionCode	collectionCode	basisOfRecord	catalogNumber	recordedBy	individualCount	lifeStage	preparations	eventDate	country	stateProvince	county	locality	verbatimElevation	minimumElevationInMeters	maximumElevationInMeters	decimalLatitude	decimalLongitude	geodeticDatum	coordinateUncertaintyInMeters	identificationQualifier	typeStatus	scientificName	kingdom	phylum	class	order	family	genus	specificEpithet	infraspecificEpithet	scientificNameAuthorship
urn:catalog:EMEC:EMEC:344761		https://creativecommons.org/publicdomain/zero/1.0/	http://vertnet.org/resources/norms.html	http://essigdb.berkeley.edu/cgi/eme_query?bnhm_id=EMEC344761&one=T	EMEC	EMEC	PreservedSpecimen	EMEC344761	Kipling Will	1	adult	pin	6/13/2009	United States	Nevada	Elko County	Ruby Lake		1830		40.2242	-115.4742	WGS1984	10			Agonum gratiosum (Mannerheim, 1853)	Animalia	Arthropoda	Insecta	Coleoptera	Carabidae	Agonum	gratiosum		(Mannerheim, 1853)
urn:catalog:EMEC:EMEC:344762		https://creativecommons.org/publicdomain/zero/1.0/	http://vertnet.org/resources/norms.html	http://essigdb.berkeley.edu/cgi/eme_query?bnhm_id=EMEC344762&one=T	EMEC	EMEC	PreservedSpecimen	EMEC344762	Kipling Will	1	adult	pin	6/13/2009	United States	Nevada	Elko County	Ruby Lake		1830		40.2242	-115.4742	WGS1984	10			Agonum gratiosum (Mannerheim, 1853)	Animalia	Arthropoda	Insecta	Coleoptera	Carabidae	Agonum	gratiosum		(Mannerheim, 1853)
urn:catalog:CAS:ENT:8302831	4/5/2016	https://creativecommons.org/publicdomain/zero/1.0/	http://vertnet.org/resources/norms.html	http://essigdb.berkeley.edu/cgi/eme_query?bnhm_id=CASENT8302831&one=T	CAS	ENT	PreservedSpecimen	CASENT8302831	C.F. Whitmyer	1	adult	pin	5/19/1967	United States	Nevada	Clark County	Las Vegas Valley				36.17497	-115.13722	WGS1984	19196			Agonum nigriceps LeConte, 1848	Animalia	Arthropoda	Insecta	Coleoptera	Carabidae	Agonum	nigriceps		LeConte, 1848
urn:catalog:EMEC:EMEC:1139249	6/23/2016	https://creativecommons.org/publicdomain/zero/1.0/	http://vertnet.org/resources/norms.html	http://essigdb.berkeley.edu/cgi/eme_query?bnhm_id=EMEC1139249&one=T	EMEC	EMEC	PreservedSpecimen	EMEC1139249	S.M. Clark	1	adult	pin	7/13/2005	United States	Nevada	Pershing County	Humboldt River, above Rye Patch Reservoir	4140ft.	1261.872		40.7	-118.21667	unknown				Agonum nigriceps LeConte, 1848	Animalia	Arthropoda	Insecta	Coleoptera	Carabidae	Agonum	nigriceps		LeConte, 1848
urn:catalog:EMEC:EMEC:1139250	6/23/2016	https://creativecommons.org/publicdomain/zero/1.0/	http://vertnet.org/resources/norms.html	http://essigdb.berkeley.edu/cgi/eme_query?bnhm_id=EMEC1139250&one=T	EMEC	EMEC	PreservedSpecimen	EMEC1139250	S.M. Clark	1	adult	pin	7/13/2005	United States	Nevada	Pershing County	Humboldt River, above Rye Patch Reservoir	4140ft.	1261.872		40.7	-118.21667	unknown				Agonum nigriceps LeConte, 1848	Animalia	Arthropoda	Insecta	Coleoptera	Carabidae	Agonum	nigriceps		LeConte, 1848
urn:catalog:EMEC:EMEC:1139251	6/23/2016	https://creativecommons.org/publicdomain/zero/1.0/	http://vertnet.org/resources/norms.html	http://essigdb.berkeley.edu/cgi/eme_query?bnhm_id=EMEC1139251&one=T	EMEC	EMEC	PreservedSpecimen	EMEC1139251	S.M. Clark	1	adult	pin	7/13/2005	United States	Nevada	Pershing County	Humboldt River, above Rye Patch Reservoir	4140ft.	1261.872		40.7	-118.21667	unknown				Agonum nigriceps LeConte, 1848	Animalia	Arthropoda	Insecta	Coleoptera	Carabidae	Agonum	nigriceps		LeConte, 1848
urn:catalog:EMEC:EMEC:1139252	6/23/2016	https://creativecommons.org/publicdomain/zero/1.0/	http://vertnet.org/resources/norms.html	http://essigdb.berkeley.edu/cgi/eme_query?bnhm_id=EMEC1139252&one=T	EMEC	EMEC	PreservedSpecimen	EMEC1139252	S.M. Clark	1	adult	pin	7/13/2005	United States	Nevada	Pershing County	Humboldt River, above Rye Patch Reservoir	4140ft.	1261.872		40.7	-118.21667	unknown				Agonum nigriceps LeConte, 1848	Animalia	Arthropoda	Insecta	Coleoptera	Carabidae	Agonum	nigriceps		LeConte, 1848
urn:catalog:EMEC:EMEC:1139254	6/23/2016	https://creativecommons.org/publicdomain/zero/1.0/	http://vertnet.org/resources/norms.html	http://essigdb.berkeley.edu/cgi/eme_query?bnhm_id=EMEC1139254&one=T	EMEC	EMEC	PreservedSpecimen	EMEC1139254	S.M. Clark	1	adult	pin	7/13/2005	United States	Nevada	Pershing County	Humboldt River, above Rye Patch Reservoir	4140ft.	1261.872		40.7	-118.21667	unknown				Agonum nigriceps LeConte, 1848	Animalia	Arthropoda	Insecta	Coleoptera	Carabidae	Agonum	nigriceps		LeConte, 1848
urn:catalog:EMEC:EMEC:1139255	6/23/2016	https://creativecommons.org/publicdomain/zero/1.0/	http://vertnet.org/resources/norms.html	http://essigdb.berkeley.edu/cgi/eme_query?bnhm_id=EMEC1139255&one=T	EMEC	EMEC	PreservedSpecimen	EMEC1139255	S.M. Clark	1	adult	pin	7/13/2005	United States	Nevada	Pershing County	Humboldt River, above Rye Patch Reservoir	4140ft.	1261.872		40.7	-118.21667	unknown				Agonum nigriceps LeConte, 1848	Animalia	Arthropoda	Insecta	Coleoptera	Carabidae	Agonum	nigriceps		LeConte, 1848
urn:catalog:EMEC:EMEC:1139253	6/23/2016	https://creativecommons.org/publicdomain/zero/1.0/	http://vertnet.org/resources/norms.html	http://essigdb.berkeley.edu/cgi/eme_query?bnhm_id=EMEC1139253&one=T	EMEC	EMEC	PreservedSpecimen	EMEC1139253	S.M. Clark	1	adult	pin	7/13/2005	United States	Nevada	Pershing County	Humboldt River, above Rye Patch Reservoir	4140ft.	1261.872		40.7	-118.21667	unknown				Agonum nigriceps LeConte, 1848	Animalia	Arthropoda	Insecta	Coleoptera	Carabidae	Agonum	nigriceps		LeConte, 1848
urn:catalog:EMEC:EMEC:1139256	6/23/2016	https://creativecommons.org/publicdomain/zero/1.0/	http://vertnet.org/resources/norms.html	http://essigdb.berkeley.edu/cgi/eme_query?bnhm_id=EMEC1139256&one=T	EMEC	EMEC	PreservedSpecimen	EMEC1139256	S.M. Clark	1	adult	pin	7/13/2005	United States	Nevada	Pershing County	Humboldt River, above Rye Patch Reservoir	4140ft.	1261.872		40.7	-118.21667	unknown				Agonum nigriceps LeConte, 1848	Animalia	Arthropoda	Insecta	Coleoptera	Carabidae	Agonum	nigriceps		LeConte, 1848
urn:catalog:EMEC:EMEC:344763	2/14/2016	https://creativecommons.org/publicdomain/zero/1.0/	http://vertnet.org/resources/norms.html	http://essigdb.berkeley.edu/cgi/eme_query?bnhm_id=EMEC344763&one=T	EMEC	EMEC	PreservedSpecimen	EMEC344763	Kipling Will, Frank Hsu, Riva Madan	1	adult	pin	6/12/2015	United States	Nevada	White Pine County	Great Basin National Park, Snake Creek		2163		38.91639	-114.18917	WGS1984	10			Agonum placidum (Say, 1823)	Animalia	Arthropoda	Insecta	Coleoptera	Carabidae	Agonum	placidum		(Say, 1823)
urn:catalog:EMEC:EMEC:344764	2/14/2016	https://creativecommons.org/publicdomain/zero/1.0/	http://vertnet.org/resources/norms.html	http://essigdb.berkeley.edu/cgi/eme_query?bnhm_id=EMEC344764&one=T	EMEC	EMEC	PreservedSpecimen	EMEC344764	Kipling Will, Frank Hsu, Riva Madan	1	adult	pin	6/11/2015	United States	Nevada	White Pine County	Great Basin National Park, Grey Cliffs		2112		38.98972	-114.215	WGS1984	10			Agonum placidum (Say, 1823)	Animalia	Arthropoda	Insecta	Coleoptera	Carabidae	Agonum	placidum		(Say, 1823)
urn:catalog:EMEC:EMEC:201894	12/22/2016	https://creativecommons.org/publicdomain/zero/1.0/	http://vertnet.org/resources/norms.html	http://essigdb.berkeley.edu/cgi/eme_query?bnhm_id=EMEC201894&one=T	EMEC	EMEC	PreservedSpecimen	EMEC201894	J. Hafernik, S. L. Szerlip	1	adult	pin	6/10/1973	United States	Nevada	Nye County	east face of Toiyabe Mountains, Bowman Creek	6600\'7000\'	2012	2134	39.16221	-117.09216	WGS1984	500			Agonum placidum (Say, 1823)	Animalia	Arthropoda	Insecta	Coleoptera	Carabidae	Agonum	placidum		(Say, 1823)
urn:catalog:CAS:ENT:8085290	12/20/2016	https://creativecommons.org/publicdomain/zero/1.0/	http://vertnet.org/resources/norms.html	http://essigdb.berkeley.edu/cgi/eme_query?bnhm_id=CASENT8085290&one=T	CAS	ENT	PreservedSpecimen	CASENT8085290	Ira LaRivers	1	adult	pin	1940-01-01/1940-01-00	United States	Nevada	Washoe County	Reno				39.5035	-119.82377	WGS1984	11948			Agonum placidum (Say, 1823)	Animalia	Arthropoda	Insecta	Coleoptera	Carabidae	Agonum	placidum		(Say, 1823)
urn:catalog:CAS:ENT:8085291	12/20/2016	https://creativecommons.org/publicdomain/zero/1.0/	http://vertnet.org/resources/norms.html	http://essigdb.berkeley.edu/cgi/eme_query?bnhm_id=CASENT8085291&one=T	CAS	ENT	PreservedSpecimen	CASENT8085291	Ira LaRivers	1	adult	pin	1940-01-01/1940-01-00	United States	Nevada	Washoe County	Reno				39.5035	-119.82377	WGS1984	11948			Agonum placidum (Say, 1823)	Animalia	Arthropoda	Insecta	Coleoptera	Carabidae	Agonum	placidum		(Say, 1823)
urn:catalog:CAS:ENT:8085292	12/20/2016	https://creativecommons.org/publicdomain/zero/1.0/	http://vertnet.org/resources/norms.html	http://essigdb.berkeley.edu/cgi/eme_query?bnhm_id=CASENT8085292&one=T	CAS	ENT	PreservedSpecimen	CASENT8085292	Ira LaRivers	1	adult	pin	1939-12-01/1939-12-00	United States	Nevada	Washoe County	Reno				39.5035	-119.82377	WGS1984	11948			Agonum placidum (Say, 1823)	Animalia	Arthropoda	Insecta	Coleoptera	Carabidae	Agonum	placidum		(Say, 1823)
urn:catalog:CAS:ENT:8085293	12/20/2016	https://creativecommons.org/publicdomain/zero/1.0/	http://vertnet.org/resources/norms.html	http://essigdb.berkeley.edu/cgi/eme_query?bnhm_id=CASENT8085293&one=T	CAS	ENT	PreservedSpecimen	CASENT8085293	Ira LaRivers	1	adult	pin	9/14/1940	United States	Nevada	Washoe County	Reno				39.5035	-119.82377	WGS1984	11948			Agonum placidum (Say, 1823)	Animalia	Arthropoda	Insecta	Coleoptera	Carabidae	Agonum	placidum		(Say, 1823)
urn:catalog:CAS:ENT:8085289	12/22/2016	https://creativecommons.org/publicdomain/zero/1.0/	http://vertnet.org/resources/norms.html	http://essigdb.berkeley.edu/cgi/eme_query?bnhm_id=CASENT8085289&one=T	CAS	ENT	PreservedSpecimen	CASENT8085289	D. H. Kavanaugh, E. A. Martinko	1	adult	pin	7/29/1971	United States	Nevada	White Pine County	Snake Range, Wheeler Peak, Stella Lake	10800\'	3292		39.00531	-114.31755	WGS1984	500			Agonum placidum (Say, 1823)	Animalia	Arthropoda	Insecta	Coleoptera	Carabidae	Agonum	placidum		(Say, 1823)
urn:catalog:EMEC:EMEC:344415	4/5/2016	https://creativecommons.org/publicdomain/zero/1.0/	http://vertnet.org/resources/norms.html	http://essigdb.berkeley.edu/cgi/eme_query?bnhm_id=EMEC344415&one=T	EMEC	EMEC	PreservedSpecimen	EMEC344415	R. W. Thorp	1	adult	pin	8/25/1960	United States	Nevada	Lincoln County	Alamo				37.36496	-115.16446	WGS1984	3600			Amara carinata (LeConte, 1848)	Animalia	Arthropoda	Insecta	Coleoptera	Carabidae	Amara	carinata		(LeConte, 1848)
urn:catalog:EMEC:EMEC:1137600		https://creativecommons.org/publicdomain/zero/1.0/	http://vertnet.org/resources/norms.html	http://essigdb.berkeley.edu/cgi/eme_query?bnhm_id=EMEC1137600&one=T	EMEC	EMEC	PreservedSpecimen	EMEC1137600	Kipling Will, Rolf Aalbu	1	adult	pin	6/4/2012	United States	Nevada	Nye County	0.7km NNE Dobbin Summit		2560		38.945	-116.5122	WGS1984	10			Amara farcta LeConte, 1855	Animalia	Arthropoda	Insecta	Coleoptera	Carabidae	Amara	farcta		LeConte, 1855
urn:catalog:EMEC:EMEC:1137601	2/14/2016	https://creativecommons.org/publicdomain/zero/1.0/	http://vertnet.org/resources/norms.html	http://essigdb.berkeley.edu/cgi/eme_query?bnhm_id=EMEC1137601&one=T	EMEC	EMEC	PreservedSpecimen	EMEC1137601	Kipling Will, Frank Hsu, Riva Madan	1	adult	pin	6/13/2015	United States	Nevada	White Pine County	Great Basin National Park, Dead Lake		2904		38.93556	-114.27417	WGS1984	10			Amara farcta LeConte, 1855	Animalia	Arthropoda	Insecta	Coleoptera	Carabidae	Amara	farcta		LeConte, 1855
urn:catalog:EMEC:EMEC:1137602	2/14/2016	https://creativecommons.org/publicdomain/zero/1.0/	http://vertnet.org/resources/norms.html	http://essigdb.berkeley.edu/cgi/eme_query?bnhm_id=EMEC1137602&one=T	EMEC	EMEC	PreservedSpecimen	EMEC1137602	Kipling Will, Frank Hsu, Riva Madan	1	adult	pin	6/13/2015	United States	Nevada	White Pine County	Great Basin National Park, Dead Lake		2904		38.93556	-114.27417	WGS1984	10			Amara farcta LeConte, 1855	Animalia	Arthropoda	Insecta	Coleoptera	Carabidae	Amara	farcta		LeConte, 1855
urn:catalog:EMEC:EMEC:1137603	2/14/2016	https://creativecommons.org/publicdomain/zero/1.0/	http://vertnet.org/resources/norms.html	http://essigdb.berkeley.edu/cgi/eme_query?bnhm_id=EMEC1137603&one=T	EMEC	EMEC	PreservedSpecimen	EMEC1137603	Kipling Will, Frank Hsu, Riva Madan	1	adult	pin	6/13/2015	United States	Nevada	White Pine County	Great Basin National Park, Dead Lake		2904		38.93556	-114.27417	WGS1984	10			Amara farcta LeConte, 1855	Animalia	Arthropoda	Insecta	Coleoptera	Carabidae	Amara	farcta		LeConte, 1855
urn:catalog:EMEC:EMEC:1137604	2/14/2016	https://creativecommons.org/publicdomain/zero/1.0/	http://vertnet.org/resources/norms.html	http://essigdb.berkeley.edu/cgi/eme_query?bnhm_id=EMEC1137604&one=T	EMEC	EMEC	PreservedSpecimen	EMEC1137604	Kipling Will, Frank Hsu, Riva Madan	1	adult	pin	6/13/2015	United States	Nevada	White Pine County	Great Basin National Park, Dead Lake		2904		38.93556	-114.27417	WGS1984	10			Amara farcta LeConte, 1855	Animalia	Arthropoda	Insecta	Coleoptera	Carabidae	Amara	farcta		LeConte, 1855
urn:catalog:EMEC:EMEC:1137605	2/14/2016	https://creativecommons.org/publicdomain/zero/1.0/	http://vertnet.org/resources/norms.html	http://essigdb.berkeley.edu/cgi/eme_query?bnhm_id=EMEC1137605&one=T	EMEC	EMEC	PreservedSpecimen	EMEC1137605	Kipling Will, Frank Hsu, Riva Madan	1	adult	pin	6/13/2015	United States	Nevada	White Pine County	Great Basin National Park, Dead Lake		2904		38.93556	-114.27417	WGS1984	10			Amara farcta LeConte, 1855	Animalia	Arthropoda	Insecta	Coleoptera	Carabidae	Amara	farcta		LeConte, 1855
urn:catalog:EMEC:EMEC:1137606	2/14/2016	https://creativecommons.org/publicdomain/zero/1.0/	http://vertnet.org/resources/norms.html	http://essigdb.berkeley.edu/cgi/eme_query?bnhm_id=EMEC1137606&one=T	EMEC	EMEC	PreservedSpecimen	EMEC1137606	Kipling Will, Frank Hsu, Riva Madan	1	adult	pin	6/13/2015	United States	Nevada	White Pine County	Great Basin National Park, Dead Lake		2904		38.93556	-114.27417	WGS1984	10			Amara farcta LeConte, 1855	Animalia	Arthropoda	Insecta	Coleoptera	Carabidae	Amara	farcta		LeConte, 1855
urn:catalog:EMEC:EMEC:1137607	2/14/2016	https://creativecommons.org/publicdomain/zero/1.0/	http://vertnet.org/resources/norms.html	http://essigdb.berkeley.edu/cgi/eme_query?bnhm_id=EMEC1137607&one=T	EMEC	EMEC	PreservedSpecimen	EMEC1137607	Kipling Will, Frank Hsu, Riva Madan	1	adult	pin	6/13/2015	United States	Nevada	White Pine County	Great Basin National Park, Dead Lake		2904		38.93556	-114.27417	WGS1984	10			Amara farcta LeConte, 1855	Animalia	Arthropoda	Insecta	Coleoptera	Carabidae	Amara	farcta		LeConte, 1855
urn:catalog:EMEC:EMEC:1137608	2/14/2016	https://creativecommons.org/publicdomain/zero/1.0/	http://vertnet.org/resources/norms.html	http://essigdb.berkeley.edu/cgi/eme_query?bnhm_id=EMEC1137608&one=T	EMEC	EMEC	PreservedSpecimen	EMEC1137608	Kipling Will, Frank Hsu, Riva Madan	1	adult	pin	6/13/2015	United States	Nevada	White Pine County	Great Basin National Park, Dead Lake		2904		38.93556	-114.27417	WGS1984	10			Amara farcta LeConte, 1855	Animalia	Arthropoda	Insecta	Coleoptera	Carabidae	Amara	farcta		LeConte, 1855
urn:catalog:EMEC:EMEC:1137609	2/14/2016	https://creativecommons.org/publicdomain/zero/1.0/	http://vertnet.org/resources/norms.html	http://essigdb.berkeley.edu/cgi/eme_query?bnhm_id=EMEC1137609&one=T	EMEC	EMEC	PreservedSpecimen	EMEC1137609	Kipling Will, Frank Hsu, Riva Madan	1	adult	pin	6/13/2015	United States	Nevada	White Pine County	Great Basin National Park, Dead Lake		2904		38.93556	-114.27417	WGS1984	10			Amara farcta LeConte, 1855	Animalia	Arthropoda	Insecta	Coleoptera	Carabidae	Amara	farcta		LeConte, 1855
urn:catalog:EMEC:EMEC:1137610	2/14/2016	https://creativecommons.org/publicdomain/zero/1.0/	http://vertnet.org/resources/norms.html	http://essigdb.berkeley.edu/cgi/eme_query?bnhm_id=EMEC1137610&one=T	EMEC	EMEC	PreservedSpecimen	EMEC1137610	Kipling Will, Frank Hsu, Riva Madan	1	adult	pin	6/13/2015	United States	Nevada	White Pine County	Great Basin National Park, Dead Lake		2904		38.93556	-114.27417	WGS1984	10			Amara farcta LeConte, 1855	Animalia	Arthropoda	Insecta	Coleoptera	Carabidae	Amara	farcta		LeConte, 1855
urn:catalog:EMEC:EMEC:1137611	2/14/2016	https://creativecommons.org/publicdomain/zero/1.0/	http://vertnet.org/resources/norms.html	http://essigdb.berkeley.edu/cgi/eme_query?bnhm_id=EMEC1137611&one=T	EMEC	EMEC	PreservedSpecimen	EMEC1137611	Kipling Will, Frank Hsu, Riva Madan	1	adult	pin	6/13/2015	United States	Nevada	White Pine County	Great Basin National Park, Dead Lake		2904		38.93556	-114.27417	WGS1984	10			Amara farcta LeConte, 1855	Animalia	Arthropoda	Insecta	Coleoptera	Carabidae	Amara	farcta		LeConte, 1855
urn:catalog:EMEC:EMEC:1137612	2/14/2016	https://creativecommons.org/publicdomain/zero/1.0/	http://vertnet.org/resources/norms.html	http://essigdb.berkeley.edu/cgi/eme_query?bnhm_id=EMEC1137612&one=T	EMEC	EMEC	PreservedSpecimen	EMEC1137612	Kipling Will, Frank Hsu, Riva Madan	1	adult	pin	6/13/2015	United States	Nevada	White Pine County	Great Basin National Park, Dead Lake		2904		38.93556	-114.27417	WGS1984	10			Amara farcta LeConte, 1855	Animalia	Arthropoda	Insecta	Coleoptera	Carabidae	Amara	farcta		LeConte, 1855
urn:catalog:EMEC:EMEC:1137613	2/14/2016	https://creativecommons.org/publicdomain/zero/1.0/	http://vertnet.org/resources/norms.html	http://essigdb.berkeley.edu/cgi/eme_query?bnhm_id=EMEC1137613&one=T	EMEC	EMEC	PreservedSpecimen	EMEC1137613	Kipling Will, Frank Hsu, Riva Madan	1	adult	pin	6/13/2015	United States	Nevada	White Pine County	Great Basin National Park, Dead Lake		2904		38.93556	-114.27417	WGS1984	10			Amara farcta LeConte, 1855	Animalia	Arthropoda	Insecta	Coleoptera	Carabidae	Amara	farcta		LeConte, 1855
urn:catalog:EMEC:EMEC:1137614	2/14/2016	https://creativecommons.org/publicdomain/zero/1.0/	http://vertnet.org/resources/norms.html	http://essigdb.berkeley.edu/cgi/eme_query?bnhm_id=EMEC1137614&one=T	EMEC	EMEC	PreservedSpecimen	EMEC1137614	Kipling Will, Frank Hsu, Riva Madan	1	adult	pin	6/13/2015	United States	Nevada	White Pine County	Great Basin National Park, Dead Lake		2904		38.93556	-114.27417	WGS1984	10			Amara farcta LeConte, 1855	Animalia	Arthropoda	Insecta	Coleoptera	Carabidae	Amara	farcta		LeConte, 1855
urn:catalog:EMEC:EMEC:1137615	2/14/2016	https://creativecommons.org/publicdomain/zero/1.0/	http://vertnet.org/resources/norms.html	http://essigdb.berkeley.edu/cgi/eme_query?bnhm_id=EMEC1137615&one=T	EMEC	EMEC	PreservedSpecimen	EMEC1137615	Kipling Will, Frank Hsu, Riva Madan	1	adult	pin	6/13/2015	United States	Nevada	White Pine County	Great Basin National Park, Dead Lake		2904		38.93556	-114.27417	WGS1984	10			Amara farcta LeConte, 1855	Animalia	Arthropoda	Insecta	Coleoptera	Carabidae	Amara	farcta		LeConte, 1855
urn:catalog:EMEC:EMEC:344791	4/5/2016	https://creativecommons.org/publicdomain/zero/1.0/	http://vertnet.org/resources/norms.html	http://essigdb.berkeley.edu/cgi/eme_query?bnhm_id=EMEC344791&one=T	EMEC	EMEC	PreservedSpecimen	EMEC344791	J. Doyen	1	adult	pin	8/9/1971	United States	Nevada	Lyon County	Fort Churchill State Monument, near Weeks				39.29386	-119.26758	WGS1984	500			Amara idahoana (Casey, 1924)	Animalia	Arthropoda	Insecta	Coleoptera	Carabidae	Amara	idahoana		(Casey, 1924)
urn:catalog:EMEC:EMEC:344792	4/5/2016	https://creativecommons.org/publicdomain/zero/1.0/	http://vertnet.org/resources/norms.html	http://essigdb.berkeley.edu/cgi/eme_query?bnhm_id=EMEC344792&one=T	EMEC	EMEC	PreservedSpecimen	EMEC344792	A. K. Johnson	1	adult	pin	6/7/1975	United States	Nevada	Nye County	Nevada Test Site Mercury, NV Civil Effects Testing Operation (CETO) Lab				36.61704	-116.01691	WGS1984	5000			Amara idahoana (Casey, 1924)	Animalia	Arthropoda	Insecta	Coleoptera	Carabidae	Amara	idahoana		(Casey, 1924)
urn:catalog:EMEC:EMEC:1139257	12/21/2016	https://creativecommons.org/publicdomain/zero/1.0/	http://vertnet.org/resources/norms.html	http://essigdb.berkeley.edu/cgi/eme_query?bnhm_id=EMEC1139257&one=T	EMEC	EMEC	PreservedSpecimen	EMEC1139257	Richard W. Baumann	1	adult	pin	4/20/2004	United States	Nevada	Humboldt County	pond, Cottonwood Creek, above Paradise Valley, Santa Rosa Range				41.54646	-117.58088	WGS1984	3000			Amara idahoana (Casey, 1924)	Animalia	Arthropoda	Insecta	Coleoptera	Carabidae	Amara	idahoana		(Casey, 1924)
urn:catalog:EMEC:EMEC:344769	2/14/2016	https://creativecommons.org/publicdomain/zero/1.0/	http://vertnet.org/resources/norms.html	http://essigdb.berkeley.edu/cgi/eme_query?bnhm_id=EMEC344769&one=T	EMEC	EMEC	PreservedSpecimen	EMEC344769	Kipling Will, Frank Hsu, Riva Madan	1	adult	pin	6/12/2015	United States	Nevada	White Pine County	Great Basin National Park, Lower Wheeler Peak Trail		3120		39.005	-114.31	WGS1984	10			Amara lindrothi Hieke, 1990	Animalia	Arthropoda	Insecta	Coleoptera	Carabidae	Amara	lindrothi		(Casey, 1924)
urn:catalog:EMEC:EMEC:344770	2/14/2016	https://creativecommons.org/publicdomain/zero/1.0/	http://vertnet.org/resources/norms.html	http://essigdb.berkeley.edu/cgi/eme_query?bnhm_id=EMEC344770&one=T	EMEC	EMEC	PreservedSpecimen	EMEC344770	Kipling Will, Frank Hsu, Riva Madan	1	adult	pin	6/12/2015	United States	Nevada	White Pine County	Great Basin National Park, Lower Wheeler Peak Trail		3120		39.005	-114.31	WGS1984	10			Amara lindrothi Hieke, 1990	Animalia	Arthropoda	Insecta	Coleoptera	Carabidae	Amara	lindrothi		Hieke, 1990
urn:catalog:EMEC:EMEC:344771	2/14/2016	https://creativecommons.org/publicdomain/zero/1.0/	http://vertnet.org/resources/norms.html	http://essigdb.berkeley.edu/cgi/eme_query?bnhm_id=EMEC344771&one=T	EMEC	EMEC	PreservedSpecimen	EMEC344771	Kipling Will, Frank Hsu, Riva Madan	1	adult	pin	6/12/2015	United States	Nevada	White Pine County	Great Basin National Park, Teresa Lake		3140		39.0025	-114.31222	WGS1984	10			Amara lindrothi Hieke, 1990	Animalia	Arthropoda	Insecta	Coleoptera	Carabidae	Amara	lindrothi		Hieke, 1990
urn:catalog:EMEC:EMEC:344772	2/14/2016	https://creativecommons.org/publicdomain/zero/1.0/	http://vertnet.org/resources/norms.html	http://essigdb.berkeley.edu/cgi/eme_query?bnhm_id=EMEC344772&one=T	EMEC	EMEC	PreservedSpecimen	EMEC344772	Kipling Will, Frank Hsu, Riva Madan	1	adult	pin	6/12/2015	United States	Nevada	White Pine County	Great Basin National Park, Teresa Lake		3140		39.0025	-114.31222	WGS1984	10			Amara lindrothi Hieke, 1990	Animalia	Arthropoda	Insecta	Coleoptera	Carabidae	Amara	lindrothi		Hieke, 1990
urn:catalog:EMEC:EMEC:344773	2/14/2016	https://creativecommons.org/publicdomain/zero/1.0/	http://vertnet.org/resources/norms.html	http://essigdb.berkeley.edu/cgi/eme_query?bnhm_id=EMEC344773&one=T	EMEC	EMEC	PreservedSpecimen	EMEC344773	Kipling Will, Frank Hsu, Riva Madan	1	adult	pin	6/13/2015	United States	Nevada	White Pine County	Great Basin National Park, Wheeler Peak Trailhead		3036		39.00944	-114.30722	WGS1984	10			Amara lindrothi Hieke, 1990	Animalia	Arthropoda	Insecta	Coleoptera	Carabidae	Amara	lindrothi		Hieke, 1990
urn:catalog:EMEC:EMEC:344774	2/14/2016	https://creativecommons.org/publicdomain/zero/1.0/	http://vertnet.org/resources/norms.html	http://essigdb.berkeley.edu/cgi/eme_query?bnhm_id=EMEC344774&one=T	EMEC	EMEC	PreservedSpecimen	EMEC344774	Kipling Will, Frank Hsu, Riva Madan	1	adult	pin	6/13/2015	United States	Nevada	White Pine County	Great Basin National Park, Wheeler Peak Trailhead		3036		39.00944	-114.30722	WGS1984	10			Amara lindrothi Hieke, 1990	Animalia	Arthropoda	Insecta	Coleoptera	Carabidae	Amara	lindrothi		Hieke, 1990
urn:catalog:EMEC:EMEC:344775	2/14/2016	https://creativecommons.org/publicdomain/zero/1.0/	http://vertnet.org/resources/norms.html	http://essigdb.berkeley.edu/cgi/eme_query?bnhm_id=EMEC344775&one=T	EMEC	EMEC	PreservedSpecimen	EMEC344775	Kipling Will, Frank Hsu, Riva Madan	1	adult	pin	6/13/2015	United States	Nevada	White Pine County	Great Basin National Park, Wheeler Peak Trailhead		3036		39.00944	-114.30722	WGS1984	10			Amara lindrothi Hieke, 1990	Animalia	Arthropoda	Insecta	Coleoptera	Carabidae	Amara	lindrothi		Hieke, 1990
urn:catalog:EMEC:EMEC:344776	2/14/2016	https://creativecommons.org/publicdomain/zero/1.0/	http://vertnet.org/resources/norms.html	http://essigdb.berkeley.edu/cgi/eme_query?bnhm_id=EMEC344776&one=T	EMEC	EMEC	PreservedSpecimen	EMEC344776	Kipling Will, Frank Hsu, Riva Madan	1	adult	pin	6/13/2015	United States	Nevada	White Pine County	Great Basin National Park, Wheeler Peak Trailhead		3036		39.00944	-114.30722	WGS1984	10			Amara lindrothi Hieke, 1990	Animalia	Arthropoda	Insecta	Coleoptera	Carabidae	Amara	lindrothi		Hieke, 1990
urn:catalog:EMEC:EMEC:344777	2/14/2016	https://creativecommons.org/publicdomain/zero/1.0/	http://vertnet.org/resources/norms.html	http://essigdb.berkeley.edu/cgi/eme_query?bnhm_id=EMEC344777&one=T	EMEC	EMEC	PreservedSpecimen	EMEC344777	Kipling Will, Frank Hsu, Riva Madan	1	adult	pin	6/13/2015	United States	Nevada	White Pine County	Great Basin National Park, Wheeler Peak Trailhead		3036		39.00944	-114.30722	WGS1984	10			Amara lindrothi Hieke, 1990	Animalia	Arthropoda	Insecta	Coleoptera	Carabidae	Amara	lindrothi		Hieke, 1990
urn:catalog:EMEC:EMEC:344778	2/14/2016	https://creativecommons.org/publicdomain/zero/1.0/	http://vertnet.org/resources/norms.html	http://essigdb.berkeley.edu/cgi/eme_query?bnhm_id=EMEC344778&one=T	EMEC	EMEC	PreservedSpecimen	EMEC344778	Kipling Will, Frank Hsu, Riva Madan	1	adult	pin	6/13/2015	United States	Nevada	White Pine County	Great Basin National Park, Wheeler Peak Trailhead		3036		39.00944	-114.30722	WGS1984	10			Amara lindrothi Hieke, 1990	Animalia	Arthropoda	Insecta	Coleoptera	Carabidae	Amara	lindrothi		Hieke, 1990
urn:catalog:EMEC:EMEC:344779	2/14/2016	https://creativecommons.org/publicdomain/zero/1.0/	http://vertnet.org/resources/norms.html	http://essigdb.berkeley.edu/cgi/eme_query?bnhm_id=EMEC344779&one=T	EMEC	EMEC	PreservedSpecimen	EMEC344779	Kipling Will, Frank Hsu, Riva Madan	1	adult	pin	6/13/2015	United States	Nevada	White Pine County	Great Basin National Park, Wheeler Peak Trailhead		3036		39.00944	-114.30722	WGS1984	10			Amara lindrothi Hieke, 1990	Animalia	Arthropoda	Insecta	Coleoptera	Carabidae	Amara	lindrothi		Hieke, 1990
urn:catalog:EMEC:EMEC:344780	2/14/2016	https://creativecommons.org/publicdomain/zero/1.0/	http://vertnet.org/resources/norms.html	http://essigdb.berkeley.edu/cgi/eme_query?bnhm_id=EMEC344780&one=T	EMEC	EMEC	PreservedSpecimen	EMEC344780	Kipling Will, Frank Hsu, Riva Madan	1	adult	pin	6/13/2015	United States	Nevada	White Pine County	Great Basin National Park, Wheeler Peak Trailhead		3036		39.00944	-114.30722	WGS1984	10			Amara lindrothi Hieke, 1990	Animalia	Arthropoda	Insecta	Coleoptera	Carabidae	Amara	lindrothi		Hieke, 1990
urn:catalog:EMEC:EMEC:344781	2/14/2016	https://creativecommons.org/publicdomain/zero/1.0/	http://vertnet.org/resources/norms.html	http://essigdb.berkeley.edu/cgi/eme_query?bnhm_id=EMEC344781&one=T	EMEC	EMEC	PreservedSpecimen	EMEC344781	Kipling Will, Frank Hsu, Riva Madan	1	adult	pin	6/13/2015	United States	Nevada	White Pine County	Great Basin National Park, Wheeler Peak Trailhead		3036		39.00944	-114.30722	WGS1984	10			Amara lindrothi Hieke, 1990	Animalia	Arthropoda	Insecta	Coleoptera	Carabidae	Amara	lindrothi		Hieke, 1990
urn:catalog:EMEC:EMEC:344782	2/14/2016	https://creativecommons.org/publicdomain/zero/1.0/	http://vertnet.org/resources/norms.html	http://essigdb.berkeley.edu/cgi/eme_query?bnhm_id=EMEC344782&one=T	EMEC	EMEC	PreservedSpecimen	EMEC344782	Kipling Will, Frank Hsu, Riva Madan	1	adult	pin	6/13/2015	United States	Nevada	White Pine County	Great Basin National Park, Wheeler Peak Trailhead		3036		39.00944	-114.30722	WGS1984	10			Amara lindrothi Hieke, 1990	Animalia	Arthropoda	Insecta	Coleoptera	Carabidae	Amara	lindrothi		Hieke, 1990
urn:catalog:EMEC:EMEC:344783	2/14/2016	https://creativecommons.org/publicdomain/zero/1.0/	http://vertnet.org/resources/norms.html	http://essigdb.berkeley.edu/cgi/eme_query?bnhm_id=EMEC344783&one=T	EMEC	EMEC	PreservedSpecimen	EMEC344783	Kipling Will, Frank Hsu, Riva Madan	1	adult	pin	6/13/2015	United States	Nevada	White Pine County	Great Basin National Park, Wheeler Peak Trailhead		3036		39.00944	-114.30722	WGS1984	10			Amara lindrothi Hieke, 1990	Animalia	Arthropoda	Insecta	Coleoptera	Carabidae	Amara	lindrothi		Hieke, 1990
urn:catalog:EMEC:EMEC:344784	2/14/2016	https://creativecommons.org/publicdomain/zero/1.0/	http://vertnet.org/resources/norms.html	http://essigdb.berkeley.edu/cgi/eme_query?bnhm_id=EMEC344784&one=T	EMEC	EMEC	PreservedSpecimen	EMEC344784	Kipling Will, Frank Hsu, Riva Madan	1	adult	pin	6/13/2015	United States	Nevada	White Pine County	Great Basin National Park, Wheeler Peak Trailhead		3036		39.00944	-114.30722	WGS1984	10			Amara lindrothi Hieke, 1990	Animalia	Arthropoda	Insecta	Coleoptera	Carabidae	Amara	lindrothi		Hieke, 1990
urn:catalog:EMEC:EMEC:344785	12/20/2016	https://creativecommons.org/publicdomain/zero/1.0/	http://vertnet.org/resources/norms.html	http://essigdb.berkeley.edu/cgi/eme_query?bnhm_id=EMEC344785&one=T	EMEC	EMEC	PreservedSpecimen	EMEC344785	J. Doyen	1	adult	pin	7/12/1971	United States	Nevada	White Pine County	Mount Wheeler	10,000\'	3048		38.98574	-114.31393	WGS1984	2000			Amara lindrothi Hieke, 1990	Animalia	Arthropoda	Insecta	Coleoptera	Carabidae	Amara	lindrothi		Hieke, 1990
urn:catalog:EMEC:EMEC:344786	12/20/2016	https://creativecommons.org/publicdomain/zero/1.0/	http://vertnet.org/resources/norms.html	http://essigdb.berkeley.edu/cgi/eme_query?bnhm_id=EMEC344786&one=T	EMEC	EMEC	PreservedSpecimen	EMEC344786	J. Doyen	1	adult	pin	7/12/1971	United States	Nevada	White Pine County	Mount Wheeler	10,000\'	3048		38.98574	-114.31393	WGS1984	2000			Amara lindrothi Hieke, 1990	Animalia	Arthropoda	Insecta	Coleoptera	Carabidae	Amara	lindrothi		Hieke, 1990
urn:catalog:EMEC:EMEC:344787	12/20/2016	https://creativecommons.org/publicdomain/zero/1.0/	http://vertnet.org/resources/norms.html	http://essigdb.berkeley.edu/cgi/eme_query?bnhm_id=EMEC344787&one=T	EMEC	EMEC	PreservedSpecimen	EMEC344787	J. Doyen	1	adult	pin	7/12/1971	United States	Nevada	White Pine County	Mount Wheeler	10,000\'	3048		38.98574	-114.31393	WGS1984	2000			Amara lindrothi Hieke, 1990	Animalia	Arthropoda	Insecta	Coleoptera	Carabidae	Amara	lindrothi		Hieke, 1990
urn:catalog:EMEC:EMEC:344788	12/20/2016	https://creativecommons.org/publicdomain/zero/1.0/	http://vertnet.org/resources/norms.html	http://essigdb.berkeley.edu/cgi/eme_query?bnhm_id=EMEC344788&one=T	EMEC	EMEC	PreservedSpecimen	EMEC344788	J. Doyen	1	adult	pin	7/12/1971	United States	Nevada	White Pine County	Mount Wheeler	10,000\'	3048		38.98574	-114.31393	WGS1984	2000			Amara lindrothi Hieke, 1990	Animalia	Arthropoda	Insecta	Coleoptera	Carabidae	Amara	lindrothi		Hieke, 1990
urn:catalog:EMEC:EMEC:1137621		https://creativecommons.org/publicdomain/zero/1.0/	http://vertnet.org/resources/norms.html	http://essigdb.berkeley.edu/cgi/eme_query?bnhm_id=EMEC1137621&one=T	EMEC	EMEC	PreservedSpecimen	EMEC1137621	Kipling Will, Rolf Aalbu	1	adult	pin	6/4/2012	United States	Nevada	Nye County	0.7km NNE Dobbin Summit		2560		38.945	-116.5122	WGS1984	10			Amara quenseli (Schonherr, 1806)	Animalia	Arthropoda	Insecta	Coleoptera	Carabidae	Amara	quenseli		(Schonherr, 1806)
urn:catalog:EMEC:EMEC:1137622		https://creativecommons.org/publicdomain/zero/1.0/	http://vertnet.org/resources/norms.html	http://essigdb.berkeley.edu/cgi/eme_query?bnhm_id=EMEC1137622&one=T	EMEC	EMEC	PreservedSpecimen	EMEC1137622	Kipling Will, Rolf Aalbu	1	adult	pin	6/4/2012	United States	Nevada	Nye County	0.7km NNE Dobbin Summit		2560		38.945	-116.5122	WGS1984	10			Amara quenseli (Schonherr, 1806)	Animalia	Arthropoda	Insecta	Coleoptera	Carabidae	Amara	quenseli		(Schonherr, 1806)
urn:catalog:EMEC:EMEC:1137623		https://creativecommons.org/publicdomain/zero/1.0/	http://vertnet.org/resources/norms.html	http://essigdb.berkeley.edu/cgi/eme_query?bnhm_id=EMEC1137623&one=T	EMEC	EMEC	PreservedSpecimen	EMEC1137623	Kipling Will, Rolf Aalbu	1	adult	pin	6/4/2012	United States	Nevada	Nye County	0.7km NNE Dobbin Summit		2560		38.945	-116.5122	WGS1984	10			Amara quenseli (Schonherr, 1806)	Animalia	Arthropoda	Insecta	Coleoptera	Carabidae	Amara	quenseli		(Schonherr, 1806)
urn:catalog:EMEC:EMEC:1137624		https://creativecommons.org/publicdomain/zero/1.0/	http://vertnet.org/resources/norms.html	http://essigdb.berkeley.edu/cgi/eme_query?bnhm_id=EMEC1137624&one=T	EMEC	EMEC	PreservedSpecimen	EMEC1137624	Kipling Will, Rolf Aalbu	1	adult	pin	6/2/2012	United States	Nevada	Lander County	rt722 at Campbell Creek		2050		39.2653	-117.6864	WGS1984	10			Amara quenseli (Schonherr, 1806)	Animalia	Arthropoda	Insecta	Coleoptera	Carabidae	Amara	quenseli		(Schonherr, 1806)
urn:catalog:EMEC:EMEC:1137625	2/14/2016	https://creativecommons.org/publicdomain/zero/1.0/	http://vertnet.org/resources/norms.html	http://essigdb.berkeley.edu/cgi/eme_query?bnhm_id=EMEC1137625&one=T	EMEC	EMEC	PreservedSpecimen	EMEC1137625	Kipling Will, Frank Hsu, Riva Madan	1	adult	pin	6/11/2015	United States	Nevada	White Pine County	Great Basin National Park, Grey Cliffs		2112		38.98972	-114.215	WGS1984	10			Amara quenseli (Schonherr, 1806)	Animalia	Arthropoda	Insecta	Coleoptera	Carabidae	Amara	quenseli		(Schonherr, 1806)
urn:catalog:EMEC:EMEC:1137626	2/14/2016	https://creativecommons.org/publicdomain/zero/1.0/	http://vertnet.org/resources/norms.html	http://essigdb.berkeley.edu/cgi/eme_query?bnhm_id=EMEC1137626&one=T	EMEC	EMEC	PreservedSpecimen	EMEC1137626	Kipling Will, Frank Hsu, Riva Madan	1	adult	pin	6/12/2015	United States	Nevada	White Pine County	Great Basin National Park, Snake Creek		2163		38.91639	-114.18917	WGS1984	10			Amara quenseli (Schonherr, 1806)	Animalia	Arthropoda	Insecta	Coleoptera	Carabidae	Amara	quenseli		(Schonherr, 1806)
urn:catalog:EMEC:EMEC:1137627		https://creativecommons.org/publicdomain/zero/1.0/	http://vertnet.org/resources/norms.html	http://essigdb.berkeley.edu/cgi/eme_query?bnhm_id=EMEC1137627&one=T	EMEC	EMEC	PreservedSpecimen	EMEC1137627	Kipling Will, Frank Hsu, Riva Madan	1	adult	pin	6/9/2015	United States	Nevada	Mineral County	Queen Canyon		2268		37.90194	-118.3525	WGS1984	10			Amara quenseli (Schonherr, 1806)	Animalia	Arthropoda	Insecta	Coleoptera	Carabidae	Amara	quenseli		(Schonherr, 1806)
urn:catalog:EMEC:EMEC:1137628	2/14/2016	https://creativecommons.org/publicdomain/zero/1.0/	http://vertnet.org/resources/norms.html	http://essigdb.berkeley.edu/cgi/eme_query?bnhm_id=EMEC1137628&one=T	EMEC	EMEC	PreservedSpecimen	EMEC1137628	Kipling Will, Frank Hsu, Riva Madan	1	adult	pin	6/13/2015	United States	Nevada	White Pine County	Great Basin National Park, Wheeler Peak Trailhead		3036		39.00944	-114.30722	WGS1984	10			Amara quenseli (Schonherr, 1806)	Animalia	Arthropoda	Insecta	Coleoptera	Carabidae	Amara	quenseli		(Schonherr, 1806)
urn:catalog:EMEC:EMEC:1137618	12/15/2016	https://creativecommons.org/publicdomain/zero/1.0/	http://vertnet.org/resources/norms.html	http://essigdb.berkeley.edu/cgi/eme_query?bnhm_id=EMEC1137618&one=T	EMEC	EMEC	PreservedSpecimen	EMEC1137618	Rolf L. Aalbu	1	adult	pin	2014-10-18/2014-10-19	United States	Nevada	Lincoln County	Temiute Mine	6122\'	1865		37.65139	-115.63333	WGS1984				Amara quenseli (Schonherr, 1806)	Animalia	Arthropoda	Insecta	Coleoptera	Carabidae	Amara	quenseli		(Schonherr, 1806)
urn:catalog:EMEC:EMEC:1137619	12/20/2016	https://creativecommons.org/publicdomain/zero/1.0/	http://vertnet.org/resources/norms.html	http://essigdb.berkeley.edu/cgi/eme_query?bnhm_id=EMEC1137619&one=T	EMEC	EMEC	PreservedSpecimen	EMEC1137619	Rolf L. Aalbu	1	adult	pin	2011-06-24/2011-06-25	United States	Nevada	Elko County	Ruby Lake, Ruby Mountains				40.19406	-115.46635	WGS1984	2275			Amara quenseli (Schonherr, 1806)	Animalia	Arthropoda	Insecta	Coleoptera	Carabidae	Amara	quenseli		(Schonherr, 1806)
urn:catalog:EMEC:EMEC:1137620	12/20/2016	https://creativecommons.org/publicdomain/zero/1.0/	http://vertnet.org/resources/norms.html	http://essigdb.berkeley.edu/cgi/eme_query?bnhm_id=EMEC1137620&one=T	EMEC	EMEC	PreservedSpecimen	EMEC1137620	Rolf L. Aalbu	1	adult	pin	2011-06-24/2011-06-25	United States	Nevada	Elko County	Ruby Lake, Ruby Mountains				40.19406	-115.46635	WGS1984	2275			Amara quenseli (Schonherr, 1806)	Animalia	Arthropoda	Insecta	Coleoptera	Carabidae	Amara	quenseli		(Schonherr, 1806)
urn:catalog:EMEC:EMEC:344400	12/20/2016	https://creativecommons.org/publicdomain/zero/1.0/	http://vertnet.org/resources/norms.html	http://essigdb.berkeley.edu/cgi/eme_query?bnhm_id=EMEC344400&one=T	EMEC	EMEC	PreservedSpecimen	EMEC344400	J. Powell	1	adult	pin	12/14/1978	United States	Nevada	Douglas County	Topaz Lake				38.68767	-119.53108	WGS1984	1427			Amara quenseli (Schonherr, 1806)	Animalia	Arthropoda	Insecta	Coleoptera	Carabidae	Amara	quenseli		(Schonherr, 1806)
urn:catalog:EMEC:EMEC:344401	12/20/2016	https://creativecommons.org/publicdomain/zero/1.0/	http://vertnet.org/resources/norms.html	http://essigdb.berkeley.edu/cgi/eme_query?bnhm_id=EMEC344401&one=T	EMEC	EMEC	PreservedSpecimen	EMEC344401	P. Opler	1	adult	pin	6/11/1970	United States	Nevada	Washoe County	31 mi. Northwest of Gerlach				41.09669	-119.3874	WGS1984	5000			Amara quenseli (Schonherr, 1806)	Animalia	Arthropoda	Insecta	Coleoptera	Carabidae	Amara	quenseli		(Schonherr, 1806)
urn:catalog:EMEC:EMEC:344402	12/20/2016	https://creativecommons.org/publicdomain/zero/1.0/	http://vertnet.org/resources/norms.html	http://essigdb.berkeley.edu/cgi/eme_query?bnhm_id=EMEC344402&one=T	EMEC	EMEC	PreservedSpecimen	EMEC344402	J. Doyen	1	adult	pin	9/13/1986	United States	Nevada	Lyon County	7 mi. East of Fernley				39.58813	-119.12377	WGS1984	1000			Amara quenseli (Schonherr, 1806)	Animalia	Arthropoda	Insecta	Coleoptera	Carabidae	Amara	quenseli		(Schonherr, 1806)
urn:catalog:EMEC:EMEC:344403	12/20/2016	https://creativecommons.org/publicdomain/zero/1.0/	http://vertnet.org/resources/norms.html	http://essigdb.berkeley.edu/cgi/eme_query?bnhm_id=EMEC344403&one=T	EMEC	EMEC	PreservedSpecimen	EMEC344403	J. Doyen	1	adult	pin	9/13/1986	United States	Nevada	Lyon County	7 mi. East of Fernley				39.58813	-119.12377	WGS1984	1000			Amara quenseli (Schonherr, 1806)	Animalia	Arthropoda	Insecta	Coleoptera	Carabidae	Amara	quenseli		(Schonherr, 1806)
urn:catalog:EMEC:EMEC:344404	12/20/2016	https://creativecommons.org/publicdomain/zero/1.0/	http://vertnet.org/resources/norms.html	http://essigdb.berkeley.edu/cgi/eme_query?bnhm_id=EMEC344404&one=T	EMEC	EMEC	PreservedSpecimen	EMEC344404	J. Doyen	1	adult	pin	9/13/1986	United States	Nevada	Lyon County	7 mi. East of Fernley				39.58813	-119.12377	WGS1984	1000			Amara quenseli (Schonherr, 1806)	Animalia	Arthropoda	Insecta	Coleoptera	Carabidae	Amara	quenseli		(Schonherr, 1806)
urn:catalog:EMEC:EMEC:344405	12/20/2016	https://creativecommons.org/publicdomain/zero/1.0/	http://vertnet.org/resources/norms.html	http://essigdb.berkeley.edu/cgi/eme_query?bnhm_id=EMEC344405&one=T	EMEC	EMEC	PreservedSpecimen	EMEC344405	J. Doyen	1	adult	pin	9/13/1986	United States	Nevada	Lyon County	7 mi. East of Fernley				39.58813	-119.12377	WGS1984	1000			Amara quenseli (Schonherr, 1806)	Animalia	Arthropoda	Insecta	Coleoptera	Carabidae	Amara	quenseli		(Schonherr, 1806)
urn:catalog:EMEC:EMEC:344406	12/20/2016	https://creativecommons.org/publicdomain/zero/1.0/	http://vertnet.org/resources/norms.html	http://essigdb.berkeley.edu/cgi/eme_query?bnhm_id=EMEC344406&one=T	EMEC	EMEC	PreservedSpecimen	EMEC344406	J. Doyen	1	adult	pin	9/13/1986	United States	Nevada	Lyon County	7 mi. East of Fernley				39.58813	-119.12377	WGS1984	1000			Amara quenseli (Schonherr, 1806)	Animalia	Arthropoda	Insecta	Coleoptera	Carabidae	Amara	quenseli		(Schonherr, 1806)
urn:catalog:EMEC:EMEC:344407	12/20/2016	https://creativecommons.org/publicdomain/zero/1.0/	http://vertnet.org/resources/norms.html	http://essigdb.berkeley.edu/cgi/eme_query?bnhm_id=EMEC344407&one=T	EMEC	EMEC	PreservedSpecimen	EMEC344407	J. Doyen	1	adult	pin	12/14/1978	United States	Nevada	Douglas County	Topaz Lake				38.68767	-119.53108	WGS1984	1427			Amara quenseli (Schonherr, 1806)	Animalia	Arthropoda	Insecta	Coleoptera	Carabidae	Amara	quenseli		(Schonherr, 1806)
urn:catalog:EMEC:EMEC:344408	12/20/2016	https://creativecommons.org/publicdomain/zero/1.0/	http://vertnet.org/resources/norms.html	http://essigdb.berkeley.edu/cgi/eme_query?bnhm_id=EMEC344408&one=T	EMEC	EMEC	PreservedSpecimen	EMEC344408	J. Doyen	1	adult	pin	9/13/1986	United States	Nevada	Lyon County	7 mi. East of Fernley				39.58813	-119.12377	WGS1984	1000			Amara quenseli (Schonherr, 1806)	Animalia	Arthropoda	Insecta	Coleoptera	Carabidae	Amara	quenseli		(Schonherr, 1806)
urn:catalog:EMEC:EMEC:344409	12/20/2016	https://creativecommons.org/publicdomain/zero/1.0/	http://vertnet.org/resources/norms.html	http://essigdb.berkeley.edu/cgi/eme_query?bnhm_id=EMEC344409&one=T	EMEC	EMEC	PreservedSpecimen	EMEC344409	J. Doyen	1	adult	pin	9/13/1986	United States	Nevada	Lyon County	7 mi. East of Fernley				39.58813	-119.12377	WGS1984	1000			Amara quenseli (Schonherr, 1806)	Animalia	Arthropoda	Insecta	Coleoptera	Carabidae	Amara	quenseli		(Schonherr, 1806)
urn:catalog:CAS:ENT:8085294	12/22/2016	https://creativecommons.org/publicdomain/zero/1.0/	http://vertnet.org/resources/norms.html	http://essigdb.berkeley.edu/cgi/eme_query?bnhm_id=CASENT8085294&one=T	CAS	ENT	PreservedSpecimen	CASENT8085294		1	adult	pin	6/25/1936	United States	Nevada	White Pine County	Nevada Governors Spring	El.5000	1935		39.13438	-115.81032	WGS1984	500			Amara sinuosa (Casey, 1918)	Animalia	Arthropoda	Insecta	Coleoptera	Carabidae	Amara	sinuosa		(Casey, 1918)
urn:catalog:EMEC:EMEC:344076	12/20/2016	https://creativecommons.org/publicdomain/zero/1.0/	http://vertnet.org/resources/norms.html	http://essigdb.berkeley.edu/cgi/eme_query?bnhm_id=EMEC344076&one=T	EMEC	EMEC	PreservedSpecimen	EMEC344076	J. Powell	1	adult	pin	12/14/1978	United States	Nevada	Douglas County	Topaz Lake				38.68767	-119.53108	WGS1984	1427			Apristus pugetanus Casey, 1920	Animalia	Arthropoda	Insecta	Coleoptera	Carabidae	Apristus	pugetanus		Casey, 1920
urn:catalog:EMEC:EMEC:344077	12/20/2016	https://creativecommons.org/publicdomain/zero/1.0/	http://vertnet.org/resources/norms.html	http://essigdb.berkeley.edu/cgi/eme_query?bnhm_id=EMEC344077&one=T	EMEC	EMEC	PreservedSpecimen	EMEC344077	J. Powell	1	adult	pin	12/14/1978	United States	Nevada	Douglas County	Topaz Lake				38.68767	-119.53108	WGS1984	1427			Apristus pugetanus Casey, 1920	Animalia	Arthropoda	Insecta	Coleoptera	Carabidae	Apristus	pugetanus		Casey, 1920
urn:catalog:EMEC:EMEC:344078	12/20/2016	https://creativecommons.org/publicdomain/zero/1.0/	http://vertnet.org/resources/norms.html	http://essigdb.berkeley.edu/cgi/eme_query?bnhm_id=EMEC344078&one=T	EMEC	EMEC	PreservedSpecimen	EMEC344078	J. Powell	1	adult	pin	12/14/1978	United States	Nevada	Douglas County	Topaz Lake				38.68767	-119.53108	WGS1984	1427			Apristus pugetanus Casey, 1920	Animalia	Arthropoda	Insecta	Coleoptera	Carabidae	Apristus	pugetanus		Casey, 1920
urn:catalog:EMEC:EMEC:344079	12/20/2016	https://creativecommons.org/publicdomain/zero/1.0/	http://vertnet.org/resources/norms.html	http://essigdb.berkeley.edu/cgi/eme_query?bnhm_id=EMEC344079&one=T	EMEC	EMEC	PreservedSpecimen	EMEC344079	J. Powell	1	adult	pin	12/14/1978	United States	Nevada	Douglas County	Topaz Lake				38.68767	-119.53108	WGS1984	1427			Apristus pugetanus Casey, 1920	Animalia	Arthropoda	Insecta	Coleoptera	Carabidae	Apristus	pugetanus		Casey, 1920
urn:catalog:EMEC:EMEC:344080	12/20/2016	https://creativecommons.org/publicdomain/zero/1.0/	http://vertnet.org/resources/norms.html	http://essigdb.berkeley.edu/cgi/eme_query?bnhm_id=EMEC344080&one=T	EMEC	EMEC	PreservedSpecimen	EMEC344080	J. Powell	1	adult	pin	12/14/1978	United States	Nevada	Douglas County	Topaz Lake				38.68767	-119.53108	WGS1984	1427			Apristus pugetanus Casey, 1920	Animalia	Arthropoda	Insecta	Coleoptera	Carabidae	Apristus	pugetanus		Casey, 1920
urn:catalog:EMEC:EMEC:344081		https://creativecommons.org/publicdomain/zero/1.0/	http://vertnet.org/resources/norms.html	http://essigdb.berkeley.edu/cgi/eme_query?bnhm_id=EMEC344081&one=T	EMEC	EMEC	PreservedSpecimen	EMEC344081	S.M. Clark	1	adult	pin	6/22/2006	United States	Nevada	Pershing County	Humboldt River, above Rye Patch Reservoir	4150 ft	1265		40.7	-118.21667	WGS1984				Apristus pugetanus Casey, 1920	Animalia	Arthropoda	Insecta	Coleoptera	Carabidae	Apristus	pugetanus		Casey, 1920
urn:catalog:EMEC:EMEC:344082	12/20/2016	https://creativecommons.org/publicdomain/zero/1.0/	http://vertnet.org/resources/norms.html	http://essigdb.berkeley.edu/cgi/eme_query?bnhm_id=EMEC344082&one=T	EMEC	EMEC	PreservedSpecimen	EMEC344082	J. Powell	1	adult	pin	12/14/1978	United States	Nevada	Douglas County	Topaz Lake				38.68767	-119.53108	WGS1984	1427			Apristus pugetanus Casey, 1920	Animalia	Arthropoda	Insecta	Coleoptera	Carabidae	Apristus	pugetanus		Casey, 1920
urn:catalog:EMEC:EMEC:344083	12/20/2016	https://creativecommons.org/publicdomain/zero/1.0/	http://vertnet.org/resources/norms.html	http://essigdb.berkeley.edu/cgi/eme_query?bnhm_id=EMEC344083&one=T	EMEC	EMEC	PreservedSpecimen	EMEC344083	J. Powell	1	adult	pin	12/14/1978	United States	Nevada	Douglas County	Topaz Lake				38.68767	-119.53108	WGS1984	1427			Apristus pugetanus Casey, 1920	Animalia	Arthropoda	Insecta	Coleoptera	Carabidae	Apristus	pugetanus		Casey, 1920
urn:catalog:EMEC:EMEC:344084	12/20/2016	https://creativecommons.org/publicdomain/zero/1.0/	http://vertnet.org/resources/norms.html	http://essigdb.berkeley.edu/cgi/eme_query?bnhm_id=EMEC344084&one=T	EMEC	EMEC	PreservedSpecimen	EMEC344084	J. Powell	1	adult	pin	12/14/1978	United States	Nevada	Douglas County	Topaz Lake				38.68767	-119.53108	WGS1984	1427			Apristus pugetanus Casey, 1920	Animalia	Arthropoda	Insecta	Coleoptera	Carabidae	Apristus	pugetanus		Casey, 1920
urn:catalog:EMEC:EMEC:344085	12/20/2016	https://creativecommons.org/publicdomain/zero/1.0/	http://vertnet.org/resources/norms.html	http://essigdb.berkeley.edu/cgi/eme_query?bnhm_id=EMEC344085&one=T	EMEC	EMEC	PreservedSpecimen	EMEC344085	J. Powell	1	adult	pin	12/14/1978	United States	Nevada	Douglas County	Topaz Lake				38.68767	-119.53108	WGS1984	1427			Apristus pugetanus Casey, 1920	Animalia	Arthropoda	Insecta	Coleoptera	Carabidae	Apristus	pugetanus		Casey, 1920
urn:catalog:EMEC:EMEC:344086	12/20/2016	https://creativecommons.org/publicdomain/zero/1.0/	http://vertnet.org/resources/norms.html	http://essigdb.berkeley.edu/cgi/eme_query?bnhm_id=EMEC344086&one=T	EMEC	EMEC	PreservedSpecimen	EMEC344086	J. Powell	1	adult	pin	12/14/1978	United States	Nevada	Douglas County	Topaz Lake				38.68767	-119.53108	WGS1984	1427			Apristus pugetanus Casey, 1920	Animalia	Arthropoda	Insecta	Coleoptera	Carabidae	Apristus	pugetanus		Casey, 1920
urn:catalog:EMEC:EMEC:344087	12/20/2016	https://creativecommons.org/publicdomain/zero/1.0/	http://vertnet.org/resources/norms.html	http://essigdb.berkeley.edu/cgi/eme_query?bnhm_id=EMEC344087&one=T	EMEC	EMEC	PreservedSpecimen	EMEC344087	J. Powell	1	adult	pin	12/14/1978	United States	Nevada	Douglas County	Topaz Lake				38.68767	-119.53108	WGS1984	1427			Apristus pugetanus Casey, 1920	Animalia	Arthropoda	Insecta	Coleoptera	Carabidae	Apristus	pugetanus		Casey, 1920
urn:catalog:EMEC:EMEC:344088	12/21/2016	https://creativecommons.org/publicdomain/zero/1.0/	http://vertnet.org/resources/norms.html	http://essigdb.berkeley.edu/cgi/eme_query?bnhm_id=EMEC344088&one=T	EMEC	EMEC	PreservedSpecimen	EMEC344088	Worley, McKinnon	1	adult	pin	3/2/2005	United States	Nevada	Lander County	Humbolt River and Rock Creek Junction				40.70199	-116.72698	WGS1984	500			Apristus pugetanus Casey, 1920	Animalia	Arthropoda	Insecta	Coleoptera	Carabidae	Apristus	pugetanus		Casey, 1920
urn:catalog:EMEC:EMEC:344089	12/20/2016	https://creativecommons.org/publicdomain/zero/1.0/	http://vertnet.org/resources/norms.html	http://essigdb.berkeley.edu/cgi/eme_query?bnhm_id=EMEC344089&one=T	EMEC	EMEC	PreservedSpecimen	EMEC344089	K. McKinnon	1	adult	pin	3/1/2006	United States	Nevada	Lander County	Humbolt River, Argenta				40.67436	-116.70565	WGS1984	2000			Apristus pugetanus Casey, 1920	Animalia	Arthropoda	Insecta	Coleoptera	Carabidae	Apristus	pugetanus		Casey, 1920
urn:catalog:EMEC:EMEC:344090	12/20/2016	https://creativecommons.org/publicdomain/zero/1.0/	http://vertnet.org/resources/norms.html	http://essigdb.berkeley.edu/cgi/eme_query?bnhm_id=EMEC344090&one=T	EMEC	EMEC	PreservedSpecimen	EMEC344090	K. McKinnon	1	adult	pin	3/1/2006	United States	Nevada	Lander County	Humbolt River, Argenta				40.67436	-116.70565	WGS1984	2000			Apristus pugetanus Casey, 1920	Animalia	Arthropoda	Insecta	Coleoptera	Carabidae	Apristus	pugetanus		Casey, 1920
urn:catalog:EMEC:EMEC:344091	12/20/2016	https://creativecommons.org/publicdomain/zero/1.0/	http://vertnet.org/resources/norms.html	http://essigdb.berkeley.edu/cgi/eme_query?bnhm_id=EMEC344091&one=T	EMEC	EMEC	PreservedSpecimen	EMEC344091	K. McKinnon	1	adult	pin	3/1/2006	United States	Nevada	Lander County	Humbolt River, Argenta				40.67436	-116.70565	WGS1984	2000			Apristus pugetanus Casey, 1920	Animalia	Arthropoda	Insecta	Coleoptera	Carabidae	Apristus	pugetanus		Casey, 1920
urn:catalog:EMEC:EMEC:344092	12/20/2016	https://creativecommons.org/publicdomain/zero/1.0/	http://vertnet.org/resources/norms.html	http://essigdb.berkeley.edu/cgi/eme_query?bnhm_id=EMEC344092&one=T	EMEC	EMEC	PreservedSpecimen	EMEC344092	K. McKinnon	1	adult	pin	3/1/2006	United States	Nevada	Lander County	Humbolt River, Argenta				40.67436	-116.70565	WGS1984	2000			Apristus pugetanus Casey, 1920	Animalia	Arthropoda	Insecta	Coleoptera	Carabidae	Apristus	pugetanus		Casey, 1920
urn:catalog:CAS:ENT:8085265	12/20/2016	https://creativecommons.org/publicdomain/zero/1.0/	http://vertnet.org/resources/norms.html	http://essigdb.berkeley.edu/cgi/eme_query?bnhm_id=CASENT8085265&one=T	CAS	ENT	PreservedSpecimen	CASENT8085265	D.G. Stibor	1	adult	pin	5/10/1967	United States	Nevada	Clark County	Las Vegas				36.20268	-115.2361	WGS1984	16409			Apristus pugetanus Casey, 1920	Animalia	Arthropoda	Insecta	Coleoptera	Carabidae	Apristus	pugetanus		Casey, 1920
urn:catalog:CAS:ENT:8085266	12/20/2016	https://creativecommons.org/publicdomain/zero/1.0/	http://vertnet.org/resources/norms.html	http://essigdb.berkeley.edu/cgi/eme_query?bnhm_id=CASENT8085266&one=T	CAS	ENT	PreservedSpecimen	CASENT8085266	Foster	1	adult	pin	10/9/1971	United States	Nevada	Clark County	Las Vegas				36.20268	-115.2361	WGS1984	16409			Apristus pugetanus Casey, 1920	Animalia	Arthropoda	Insecta	Coleoptera	Carabidae	Apristus	pugetanus		Casey, 1920
urn:catalog:CAS:ENT:8085273	12/21/2016	https://creativecommons.org/publicdomain/zero/1.0/	http://vertnet.org/resources/norms.html	http://essigdb.berkeley.edu/cgi/eme_query?bnhm_id=CASENT8085273&one=T	CAS	ENT	PreservedSpecimen	CASENT8085273	L.S. Slevin	1	adult	pin	6/2/1931	United States	Nevada	Washoe County	Reno Hot Springs				39.52963	-119.8138	WGS1984	14007			Apristus pugetanus Casey, 1920	Animalia	Arthropoda	Insecta	Coleoptera	Carabidae	Apristus	pugetanus		Casey, 1920
urn:catalog:CAS:ENT:8085274	12/20/2016	https://creativecommons.org/publicdomain/zero/1.0/	http://vertnet.org/resources/norms.html	http://essigdb.berkeley.edu/cgi/eme_query?bnhm_id=CASENT8085274&one=T	CAS	ENT	PreservedSpecimen	CASENT8085274	L.S. Slevin	1	adult	pin	5/31/1931	United States	Nevada	Washoe County	Verdi				39.51833	-119.98778	WGS1984	2000			Apristus pugetanus Casey, 1920	Animalia	Arthropoda	Insecta	Coleoptera	Carabidae	Apristus	pugetanus		Casey, 1920
urn:catalog:CAS:ENT:8085275	12/21/2016	https://creativecommons.org/publicdomain/zero/1.0/	http://vertnet.org/resources/norms.html	http://essigdb.berkeley.edu/cgi/eme_query?bnhm_id=CASENT8085275&one=T	CAS	ENT	PreservedSpecimen	CASENT8085275	L.S. Slevin	1	adult	pin	6/2/1931	United States	Nevada	Washoe County	Reno Hot Springs				39.52963	-119.8138	WGS1984	14007			Apristus pugetanus Casey, 1920	Animalia	Arthropoda	Insecta	Coleoptera	Carabidae	Apristus	pugetanus		Casey, 1920
urn:catalog:CAS:ENT:8085276	12/20/2016	https://creativecommons.org/publicdomain/zero/1.0/	http://vertnet.org/resources/norms.html	http://essigdb.berkeley.edu/cgi/eme_query?bnhm_id=CASENT8085276&one=T	CAS	ENT	PreservedSpecimen	CASENT8085276	C. N. Slobodchikoff	1	adult	pin	6/18/1964	United States	Nevada	Washoe County	Verdi				39.51833	-119.98778	WGS1984	2000			Apristus pugetanus Casey, 1920	Animalia	Arthropoda	Insecta	Coleoptera	Carabidae	Apristus	pugetanus		Casey, 1920
urn:catalog:CAS:ENT:8085277	12/20/2016	https://creativecommons.org/publicdomain/zero/1.0/	http://vertnet.org/resources/norms.html	http://essigdb.berkeley.edu/cgi/eme_query?bnhm_id=CASENT8085277&one=T	CAS	ENT	PreservedSpecimen	CASENT8085277	C. N. Slobodchikoff	1	adult	pin	6/18/1964	United States	Nevada	Washoe County	Verdi				39.51833	-119.98778	WGS1984	2000			Apristus pugetanus Casey, 1920	Animalia	Arthropoda	Insecta	Coleoptera	Carabidae	Apristus	pugetanus		Casey, 1920
urn:catalog:CAS:ENT:8085278	12/20/2016	https://creativecommons.org/publicdomain/zero/1.0/	http://vertnet.org/resources/norms.html	http://essigdb.berkeley.edu/cgi/eme_query?bnhm_id=CASENT8085278&one=T	CAS	ENT	PreservedSpecimen	CASENT8085278	C. N. Slobodchikoff	1	adult	pin	6/18/1964	United States	Nevada	Washoe County	Verdi				39.51833	-119.98778	WGS1984	2000			Apristus pugetanus Casey, 1920	Animalia	Arthropoda	Insecta	Coleoptera	Carabidae	Apristus	pugetanus		Casey, 1920
urn:catalog:CAS:ENT:8085279	12/20/2016	https://creativecommons.org/publicdomain/zero/1.0/	http://vertnet.org/resources/norms.html	http://essigdb.berkeley.edu/cgi/eme_query?bnhm_id=CASENT8085279&one=T	CAS	ENT	PreservedSpecimen	CASENT8085279	Ira LaRivers	1	adult	pin	5/3/1941	United States	Nevada	Washoe County	Reno				39.5035	-119.82377	WGS1984	11948			Apristus pugetanus Casey, 1920	Animalia	Arthropoda	Insecta	Coleoptera	Carabidae	Apristus	pugetanus		Casey, 1920
urn:catalog:CAS:ENT:8085280	12/20/2016	https://creativecommons.org/publicdomain/zero/1.0/	http://vertnet.org/resources/norms.html	http://essigdb.berkeley.edu/cgi/eme_query?bnhm_id=CASENT8085280&one=T	CAS	ENT	PreservedSpecimen	CASENT8085280	Roberta L. Brett	1	adult	pin	6/29/1988	United States	Nevada	Elko County	Moonlite Mine, 4 miles East Midas	1625m	1625		41.26026	-116.72338	WGS1984	1000			Apristus pugetanus Casey, 1920	Animalia	Arthropoda	Insecta	Coleoptera	Carabidae	Apristus	pugetanus		Casey, 1920
urn:catalog:CAS:ENT:8085281	12/20/2016	https://creativecommons.org/publicdomain/zero/1.0/	http://vertnet.org/resources/norms.html	http://essigdb.berkeley.edu/cgi/eme_query?bnhm_id=CASENT8085281&one=T	CAS	ENT	PreservedSpecimen	CASENT8085281	Roberta L. Brett	1	adult	pin	6/29/1988	United States	Nevada	Elko County	Moonlite Mine, 4 miles East Midas	1625m	1625		41.26026	-116.72338	WGS1984	1000			Apristus pugetanus Casey, 1920	Animalia	Arthropoda	Insecta	Coleoptera	Carabidae	Apristus	pugetanus		Casey, 1920
urn:catalog:CAS:ENT:8085282	12/20/2016	https://creativecommons.org/publicdomain/zero/1.0/	http://vertnet.org/resources/norms.html	http://essigdb.berkeley.edu/cgi/eme_query?bnhm_id=CASENT8085282&one=T	CAS	ENT	PreservedSpecimen	CASENT8085282	Roberta L. Brett	1	adult	pin	6/28/1988	United States	Nevada	Elko County	24 miles Northeast of Getchell mine cutoff, South flowing tributary of Evans creek at base of Snowstorm Mountains				41.2085	-116.84891	WGS1984	1000			Apristus pugetanus Casey, 1920	Animalia	Arthropoda	Insecta	Coleoptera	Carabidae	Apristus	pugetanus		Casey, 1920
urn:catalog:CAS:ENT:8085283	12/20/2016	https://creativecommons.org/publicdomain/zero/1.0/	http://vertnet.org/resources/norms.html	http://essigdb.berkeley.edu/cgi/eme_query?bnhm_id=CASENT8085283&one=T	CAS	ENT	PreservedSpecimen	CASENT8085283	Roberta L. Brett	1	adult	pin	6/29/1988	United States	Nevada	Elko County	4 miles east of Midas, Moonlite Mine	1625m	1625		41.26026	-116.72338	WGS1984	1000			Apristus pugetanus Casey, 1920	Animalia	Arthropoda	Insecta	Coleoptera	Carabidae	Apristus	pugetanus		Casey, 1920
urn:catalog:CAS:ENT:8085285	12/20/2016	https://creativecommons.org/publicdomain/zero/1.0/	http://vertnet.org/resources/norms.html	http://essigdb.berkeley.edu/cgi/eme_query?bnhm_id=CASENT8085285&one=T	CAS	ENT	PreservedSpecimen	CASENT8085285	Roberta L. Brett	1	adult	pin	6/29/1988	United States	Nevada	Elko County	4 miles East of Midas, Moonlite Mine	1625m	1625		41.26026	-116.72338	WGS1984	1000			Apristus pugetanus Casey, 1920	Animalia	Arthropoda	Insecta	Coleoptera	Carabidae	Apristus	pugetanus		Casey, 1920
urn:catalog:CAS:ENT:8085286	12/20/2016	https://creativecommons.org/publicdomain/zero/1.0/	http://vertnet.org/resources/norms.html	http://essigdb.berkeley.edu/cgi/eme_query?bnhm_id=CASENT8085286&one=T	CAS	ENT	PreservedSpecimen	CASENT8085286	Roberta L. Brett	1	adult	pin	6/29/1988	United States	Nevada	Elko County	4 miles East of Midas, Moonlite Mine		1625		41.26026	-116.72338	WGS1984	1000			Apristus pugetanus Casey, 1920	Animalia	Arthropoda	Insecta	Coleoptera	Carabidae	Apristus	pugetanus		Casey, 1920
urn:catalog:CAS:ENT:8085287	12/20/2016	https://creativecommons.org/publicdomain/zero/1.0/	http://vertnet.org/resources/norms.html	http://essigdb.berkeley.edu/cgi/eme_query?bnhm_id=CASENT8085287&one=T	CAS	ENT	PreservedSpecimen	CASENT8085287	Roberta L. Brett	1	adult	pin	6/29/1988	United States	Nevada	Elko County	4 miles East of Midas, Moonlite Mine		1625		41.26026	-116.72338	WGS1984	1000			Apristus pugetanus Casey, 1920	Animalia	Arthropoda	Insecta	Coleoptera	Carabidae	Apristus	pugetanus		Casey, 1920
urn:catalog:CAS:ENT:8085288	12/20/2016	https://creativecommons.org/publicdomain/zero/1.0/	http://vertnet.org/resources/norms.html	http://essigdb.berkeley.edu/cgi/eme_query?bnhm_id=CASENT8085288&one=T	CAS	ENT	PreservedSpecimen	CASENT8085288	Roberta L. Brett	1	adult	pin	6/29/1988	United States	Nevada	Elko County	4 miles East of Midas, Moonlite Mine		1625		41.26026	-116.72338	WGS1984	1000			Apristus pugetanus Casey, 1920	Animalia	Arthropoda	Insecta	Coleoptera	Carabidae	Apristus	pugetanus		Casey, 1920
urn:catalog:CAS:ENT:8085284	12/21/2016	https://creativecommons.org/publicdomain/zero/1.0/	http://vertnet.org/resources/norms.html	http://essigdb.berkeley.edu/cgi/eme_query?bnhm_id=CASENT8085284&one=T	CAS	ENT	PreservedSpecimen	CASENT8085284	Roberta L. Brett	1	adult	pin	6/27/1988	United States	Nevada	Humbolt County	1 mile North of junction where Highway 95 crosses Humboldt River	1330 m	1330		40.9878	-117.72842	WGS1984				Apristus pugetanus Casey, 1920	Animalia	Arthropoda	Insecta	Coleoptera	Carabidae	Apristus	pugetanus		Casey, 1920
urn:catalog:EMEC:EMEC:201889	4/5/2016	https://creativecommons.org/publicdomain/zero/1.0/	http://vertnet.org/resources/norms.html	http://essigdb.berkeley.edu/cgi/eme_query?bnhm_id=EMEC201889&one=T	EMEC	EMEC	PreservedSpecimen	EMEC201889	C. W. O\'Brien	1	adult	pin	3/11/2007	United States	Nevada	Clark County	12mi. West of Searchlight				35.45996	-115.13295	WGS1984	500			Axinopalpus biplagiatus (Dejean, 1825)	Animalia	Arthropoda	Insecta	Coleoptera	Carabidae	Axinopalpus	biplagiatus		(Dejean, 1825)
urn:catalog:EMEC:EMEC:1139236	4/5/2016	https://creativecommons.org/publicdomain/zero/1.0/	http://vertnet.org/resources/norms.html	http://essigdb.berkeley.edu/cgi/eme_query?bnhm_id=EMEC1139236&one=T	EMEC	EMEC	PreservedSpecimen	EMEC1139236	S.M. Clark	1	adult	pin	6/15/2006	United States	Nevada	White Pine County	Silver Creek above SIlver Creek Reservoir	5600ft	1706.88		39.1	-114.15	unknown				Axinopalpus biplagiatus (Dejean, 1825)	Animalia	Arthropoda	Insecta	Coleoptera	Carabidae	Axinopalpus	biplagiatus		(Dejean, 1825)
urn:catalog:CAS:ENT:8085295	12/20/2016	https://creativecommons.org/publicdomain/zero/1.0/	http://vertnet.org/resources/norms.html	http://essigdb.berkeley.edu/cgi/eme_query?bnhm_id=CASENT8085295&one=T	CAS	ENT	PreservedSpecimen	CASENT8085295	F. E. Blaisdell	1	adult	pin	7/3/1929	United States	Nevada	Pershing County	Lovelock				40.17944	-118.4725	WGS1984	2000			Axinopalpus biplagiatus (Dejean, 1825)	Animalia	Arthropoda	Insecta	Coleoptera	Carabidae	Axinopalpus	biplagiatus		(Dejean, 1825)
urn:catalog:CAS:ENT:8085296	12/20/2016	https://creativecommons.org/publicdomain/zero/1.0/	http://vertnet.org/resources/norms.html	http://essigdb.berkeley.edu/cgi/eme_query?bnhm_id=CASENT8085296&one=T	CAS	ENT	PreservedSpecimen	CASENT8085296	F. E. Blaisdell	1	adult	pin	7/3/1929	United States	Nevada	Pershing County	Lovelock				40.17944	-118.4725	WGS1984	2000			Axinopalpus biplagiatus (Dejean, 1825)	Animalia	Arthropoda	Insecta	Coleoptera	Carabidae	Axinopalpus	biplagiatus		(Dejean, 1825)
urn:catalog:CAS:ENT:8085303	12/20/2016	https://creativecommons.org/publicdomain/zero/1.0/	http://vertnet.org/resources/norms.html	http://essigdb.berkeley.edu/cgi/eme_query?bnhm_id=CASENT8085303&one=T	CAS	ENT	PreservedSpecimen	CASENT8085303	Roberta L. Brett	1	adult	pin	6/28/1988	United States	Nevada	Elko County	24 miles northeast of Getchell mine cutoff, south flowing tributary of Evans creek at base of Snowstorm Mountains				41.2085	-116.84891	WGS1984	1000			Axinopalpus biplagiatus (Dejean, 1825)	Animalia	Arthropoda	Insecta	Coleoptera	Carabidae	Axinopalpus	biplagiatus		(Dejean, 1825)
urn:catalog:CAS:ENT:8085302	12/20/2016	https://creativecommons.org/publicdomain/zero/1.0/	http://vertnet.org/resources/norms.html	http://essigdb.berkeley.edu/cgi/eme_query?bnhm_id=CASENT8085302&one=T	CAS	ENT	PreservedSpecimen	CASENT8085302	F. E. Blaisdell	1	adult	pin	7/3/1929	United States	Nevada	Pershing County	Lovelock				40.17944	-118.4725	WGS1984	2000			Axinopalpus biplagiatus (Dejean, 1825)	Animalia	Arthropoda	Insecta	Coleoptera	Carabidae	Axinopalpus	biplagiatus		(Dejean, 1825)
urn:catalog:CAS:ENT:8085301	12/20/2016	https://creativecommons.org/publicdomain/zero/1.0/	http://vertnet.org/resources/norms.html	http://essigdb.berkeley.edu/cgi/eme_query?bnhm_id=CASENT8085301&one=T	CAS	ENT	PreservedSpecimen	CASENT8085301	F. E. Blaisdell	1	adult	pin	7/3/1929	United States	Nevada	Pershing County	Lovelock				40.17944	-118.4725	WGS1984	2000			Axinopalpus biplagiatus (Dejean, 1825)	Animalia	Arthropoda	Insecta	Coleoptera	Carabidae	Axinopalpus	biplagiatus		(Dejean, 1825)
urn:catalog:CAS:ENT:8085300	12/20/2016	https://creativecommons.org/publicdomain/zero/1.0/	http://vertnet.org/resources/norms.html	http://essigdb.berkeley.edu/cgi/eme_query?bnhm_id=CASENT8085300&one=T	CAS	ENT	PreservedSpecimen	CASENT8085300	F. E. Blaisdell	1	adult	pin	7/3/1929	United States	Nevada	Pershing County	Lovelock				40.17944	-118.4725	WGS1984	2000			Axinopalpus biplagiatus (Dejean, 1825)	Animalia	Arthropoda	Insecta	Coleoptera	Carabidae	Axinopalpus	biplagiatus		(Dejean, 1825)
urn:catalog:CAS:ENT:8085299	12/20/2016	https://creativecommons.org/publicdomain/zero/1.0/	http://vertnet.org/resources/norms.html	http://essigdb.berkeley.edu/cgi/eme_query?bnhm_id=CASENT8085299&one=T	CAS	ENT	PreservedSpecimen	CASENT8085299	F. E. Blaisdell	1	adult	pin	7/3/1929	United States	Nevada	Pershing County	Lovelock				40.17944	-118.4725	WGS1984	2000			Axinopalpus biplagiatus (Dejean, 1825)	Animalia	Arthropoda	Insecta	Coleoptera	Carabidae	Axinopalpus	biplagiatus		(Dejean, 1825)
urn:catalog:CAS:ENT:8085298	12/20/2016	https://creativecommons.org/publicdomain/zero/1.0/	http://vertnet.org/resources/norms.html	http://essigdb.berkeley.edu/cgi/eme_query?bnhm_id=CASENT8085298&one=T	CAS	ENT	PreservedSpecimen	CASENT8085298	F. E. Blaisdell	1	adult	pin	7/3/1929	United States	Nevada	Pershing County	Lovelock				40.17944	-118.4725	WGS1984	2000			Axinopalpus biplagiatus (Dejean, 1825)	Animalia	Arthropoda	Insecta	Coleoptera	Carabidae	Axinopalpus	biplagiatus		(Dejean, 1825)
urn:catalog:CAS:ENT:8085297	12/20/2016	https://creativecommons.org/publicdomain/zero/1.0/	http://vertnet.org/resources/norms.html	http://essigdb.berkeley.edu/cgi/eme_query?bnhm_id=CASENT8085297&one=T	CAS	ENT	PreservedSpecimen	CASENT8085297	F. E. Blaisdell	1	adult	pin	7/3/1929	United States	Nevada	Pershing County	Lovelock				40.17944	-118.4725	WGS1984	2000			Axinopalpus biplagiatus (Dejean, 1825)	Animalia	Arthropoda	Insecta	Coleoptera	Carabidae	Axinopalpus	biplagiatus		(Dejean, 1825)
urn:catalog:CAS:ENT:8085304	12/21/2016	https://creativecommons.org/publicdomain/zero/1.0/	http://vertnet.org/resources/norms.html	http://essigdb.berkeley.edu/cgi/eme_query?bnhm_id=CASENT8085304&one=T	CAS	ENT	PreservedSpecimen	CASENT8085304	O. Bryant	1	adult	pin	5/27/1949	United States	Nevada	Washoe County	Mount Rose	Jun-00	1829	2134	39.33934	-119.86027	WGS1984	1000			Axinopalpus biplagiatus (Dejean, 1825)	Animalia	Arthropoda	Insecta	Coleoptera	Carabidae	Axinopalpus	biplagiatus		(Dejean, 1825)
urn:catalog:EMEC:EMEC:1139260		https://creativecommons.org/publicdomain/zero/1.0/	http://vertnet.org/resources/norms.html	http://essigdb.berkeley.edu/cgi/eme_query?bnhm_id=EMEC1139260&one=T	EMEC	EMEC	PreservedSpecimen	EMEC1139260	S.M. Clark	1	adult	pin	9/20/2005	United States	Nevada	Clark County	Newberry Mountains, Grapevine Canyon	2360 ft.	719.328		35.23333	-114.68333	unknown				Axinopalpus fusciceps LeConte, 1851	Animalia	Arthropoda	Insecta	Coleoptera	Carabidae	Axinopalpus	fusciceps		LeConte, 1851
urn:catalog:EMEC:EMEC:1137673	4/5/2016	https://creativecommons.org/publicdomain/zero/1.0/	http://vertnet.org/resources/norms.html	http://essigdb.berkeley.edu/cgi/eme_query?bnhm_id=EMEC1137673&one=T	EMEC	EMEC	PreservedSpecimen	EMEC1137673	W. Gagne, J. Haddock	1	adult	pin	6/23/1966	United States	Nevada	Eureka County	Humboldt River 23 miles West of Carlin				40.69893	-116.51743	WGS1984	500			Bembidion acutifrons LeConte, 1879	Animalia	Arthropoda	Insecta	Coleoptera	Carabidae	Bembidion	acutifrons		LeConte, 1879
urn:catalog:EMEC:EMEC:345758	11/4/2016	https://creativecommons.org/publicdomain/zero/1.0/	http://vertnet.org/resources/norms.html	http://essigdb.berkeley.edu/cgi/eme_query?bnhm_id=EMEC345758&one=T	EMEC	EMEC	PreservedSpecimen	EMEC345758	J. K. Liebherr	1	adult	pin	6/18/1980	United States	Nevada	Elko County	Ruby Valley @ Franklin R.	6200\'	1890		40.36001	-115.44789	WGS1984				Bembidion acutifrons LeConte, 1879	Animalia	Arthropoda	Insecta	Coleoptera	Carabidae	Bembidion	acutifrons		LeConte, 1879
urn:catalog:EMEC:EMEC:345759	11/4/2016	https://creativecommons.org/publicdomain/zero/1.0/	http://vertnet.org/resources/norms.html	http://essigdb.berkeley.edu/cgi/eme_query?bnhm_id=EMEC345759&one=T	EMEC	EMEC	PreservedSpecimen	EMEC345759	J. K. Liebherr	1	adult	pin	6/18/1980	United States	Nevada	Elko County	Deeth, 1.0 mi. E	5400\'	1646		41.06547	-115.27478	WGS1984				Bembidion acutifrons LeConte, 1879	Animalia	Arthropoda	Insecta	Coleoptera	Carabidae	Bembidion	acutifrons		LeConte, 1879
urn:catalog:EMEC:EMEC:345760	11/4/2016	https://creativecommons.org/publicdomain/zero/1.0/	http://vertnet.org/resources/norms.html	http://essigdb.berkeley.edu/cgi/eme_query?bnhm_id=EMEC345760&one=T	EMEC	EMEC	PreservedSpecimen	EMEC345760	J. K. Liebherr	1	adult	pin	6/18/1980	United States	Nevada	Elko County	Deeth, 1.0 mi. E	5400\'	1646		41.06547	-115.27478	WGS1984				Bembidion acutifrons LeConte, 1879	Animalia	Arthropoda	Insecta	Coleoptera	Carabidae	Bembidion	acutifrons		LeConte, 1879
urn:catalog:EMEC:EMEC:345761	11/4/2016	https://creativecommons.org/publicdomain/zero/1.0/	http://vertnet.org/resources/norms.html	http://essigdb.berkeley.edu/cgi/eme_query?bnhm_id=EMEC345761&one=T	EMEC	EMEC	PreservedSpecimen	EMEC345761	J. K. Liebherr	1	adult	pin	6/18/1980	United States	Nevada	Elko County	Deeth, 1.0 mi. E	5400\'	1646		41.06547	-115.27478	WGS1984				Bembidion acutifrons LeConte, 1879	Animalia	Arthropoda	Insecta	Coleoptera	Carabidae	Bembidion	acutifrons		LeConte, 1879
urn:catalog:OSAC:OSAC:2001413	2/4/2017	https://creativecommons.org/publicdomain/zero/1.0/	http://vertnet.org/resources/norms.html	http://essigdb.berkeley.edu/cgi/eme_query?bnhm_id=OSAC2001413&one=T	OSAC	OSAC	PreservedSpecimen	OSAC2001413	David R. Maddison, A. Elizabeth Arnold	1	adult	pin	5/25/2000	United States	Nevada	Douglas County	Spooner Summitt Rest Area		2175		39.1041	-119.8943	WGS1984				Bembidion anguliferum (LeConte, 1852)	Animalia	Arthropoda	Insecta	Coleoptera	Carabidae	Bembidion	anguliferum		(LeConte, 1852)
urn:catalog:OSAC:OSAC:2003094		https://creativecommons.org/publicdomain/zero/1.0/	http://vertnet.org/resources/norms.html	http://essigdb.berkeley.edu/cgi/eme_query?bnhm_id=OSAC2003094&one=T	OSAC	OSAC	PreservedSpecimen	OSAC2003094	David R. Maddison, A. Elizabeth Arnold	1	adult	pin	5/24/2000	United States	Nevada	Lyon County	Carson River near Weeks		390		39.2866	-119.2778	WGS1984				Bembidion approximatum (LeConte, 1852)	Animalia	Arthropoda	Insecta	Coleoptera	Carabidae	Bembidion	approximatum		(LeConte, 1852)
urn:catalog:EMEC:EMEC:345700	8/15/2016	https://creativecommons.org/publicdomain/zero/1.0/	http://vertnet.org/resources/norms.html	http://essigdb.berkeley.edu/cgi/eme_query?bnhm_id=EMEC345700&one=T	EMEC	EMEC	PreservedSpecimen	EMEC345700	J. K. Liebherr	1	adult	pin	6/15/1980	United States	Nevada	Nye County	Springdale, 1.0 mi. S	3400\'	1036		37.02993	-116.75695	WGS1984				Bembidion approximatum (LeConte, 1852)	Animalia	Arthropoda	Insecta	Coleoptera	Carabidae	Bembidion	approximatum		(LeConte, 1852)
urn:catalog:EMEC:EMEC:345709		https://creativecommons.org/publicdomain/zero/1.0/	http://vertnet.org/resources/norms.html	http://essigdb.berkeley.edu/cgi/eme_query?bnhm_id=EMEC345709&one=T	EMEC	EMEC	PreservedSpecimen	EMEC345709	J. K. Liebherr	1	adult	pin	6/18/1980	United States	Nevada	Elko County	Ruby Valley @ Franklin R.	6200\'	1890		40.36001	-115.44789	WGS1984				Bembidion approximatum (LeConte, 1852)	Animalia	Arthropoda	Insecta	Coleoptera	Carabidae	Bembidion	approximatum		(LeConte, 1852)
urn:catalog:EMEC:EMEC:345710		https://creativecommons.org/publicdomain/zero/1.0/	http://vertnet.org/resources/norms.html	http://essigdb.berkeley.edu/cgi/eme_query?bnhm_id=EMEC345710&one=T	EMEC	EMEC	PreservedSpecimen	EMEC345710	J. K. Liebherr	1	adult	pin	6/18/1980	United States	Nevada	Elko County	Ruby Valley @ Franklin R.	6200\'	1890		40.36001	-115.44789	WGS1984				Bembidion approximatum (LeConte, 1852)	Animalia	Arthropoda	Insecta	Coleoptera	Carabidae	Bembidion	approximatum		(LeConte, 1852)
urn:catalog:EMEC:EMEC:345711		https://creativecommons.org/publicdomain/zero/1.0/	http://vertnet.org/resources/norms.html	http://essigdb.berkeley.edu/cgi/eme_query?bnhm_id=EMEC345711&one=T	EMEC	EMEC	PreservedSpecimen	EMEC345711	J. K. Liebherr	1	adult	pin	6/16/1980	United States	Nevada	Lincoln County	Pahranagat N.W.R.	3400\'	1036		37.24629	-115.10866	WGS1984				Bembidion approximatum (LeConte, 1852)	Animalia	Arthropoda	Insecta	Coleoptera	Carabidae	Bembidion	approximatum		(LeConte, 1852)
urn:catalog:EMEC:EMEC:345712		https://creativecommons.org/publicdomain/zero/1.0/	http://vertnet.org/resources/norms.html	http://essigdb.berkeley.edu/cgi/eme_query?bnhm_id=EMEC345712&one=T	EMEC	EMEC	PreservedSpecimen	EMEC345712	J. K. Liebherr	1	adult	pin	6/16/1980	United States	Nevada	Lincoln County	Pahranagat N.W.R.	3400\'	1036		37.24629	-115.10866	WGS1984				Bembidion approximatum (LeConte, 1852)	Animalia	Arthropoda	Insecta	Coleoptera	Carabidae	Bembidion	approximatum		(LeConte, 1852)
urn:catalog:EMEC:EMEC:345713		https://creativecommons.org/publicdomain/zero/1.0/	http://vertnet.org/resources/norms.html	http://essigdb.berkeley.edu/cgi/eme_query?bnhm_id=EMEC345713&one=T	EMEC	EMEC	PreservedSpecimen	EMEC345713	J. K. Liebherr	1	adult	pin	6/16/1980	United States	Nevada	Lincoln County	Pahranagat N.W.R.	3400\'	1036		37.24629	-115.10866	WGS1984				Bembidion approximatum (LeConte, 1852)	Animalia	Arthropoda	Insecta	Coleoptera	Carabidae	Bembidion	approximatum		(LeConte, 1852)
urn:catalog:EMEC:EMEC:345714		https://creativecommons.org/publicdomain/zero/1.0/	http://vertnet.org/resources/norms.html	http://essigdb.berkeley.edu/cgi/eme_query?bnhm_id=EMEC345714&one=T	EMEC	EMEC	PreservedSpecimen	EMEC345714	J. K. Liebherr	1	adult	pin	6/16/1980	United States	Nevada	Lincoln County	Pahranagat N.W.R.	3400\'	1036		37.24629	-115.10866	WGS1984				Bembidion approximatum (LeConte, 1852)	Animalia	Arthropoda	Insecta	Coleoptera	Carabidae	Bembidion	approximatum		(LeConte, 1852)
urn:catalog:EMEC:EMEC:345715		https://creativecommons.org/publicdomain/zero/1.0/	http://vertnet.org/resources/norms.html	http://essigdb.berkeley.edu/cgi/eme_query?bnhm_id=EMEC345715&one=T	EMEC	EMEC	PreservedSpecimen	EMEC345715	J. K. Liebherr	1	adult	pin	6/16/1980	United States	Nevada	Lincoln County	Pahranagat N.W.R.	3400\'	1036		37.24629	-115.10866	WGS1984				Bembidion approximatum (LeConte, 1852)	Animalia	Arthropoda	Insecta	Coleoptera	Carabidae	Bembidion	approximatum		(LeConte, 1852)
urn:catalog:EMEC:EMEC:345716		https://creativecommons.org/publicdomain/zero/1.0/	http://vertnet.org/resources/norms.html	http://essigdb.berkeley.edu/cgi/eme_query?bnhm_id=EMEC345716&one=T	EMEC	EMEC	PreservedSpecimen	EMEC345716	J. K. Liebherr	1	adult	pin	6/16/1980	United States	Nevada	Lincoln County	Pahranagat N.W.R.	3400\'	1036		37.24629	-115.10866	WGS1984				Bembidion approximatum (LeConte, 1852)	Animalia	Arthropoda	Insecta	Coleoptera	Carabidae	Bembidion	approximatum		(LeConte, 1852)
urn:catalog:EMEC:EMEC:345717		https://creativecommons.org/publicdomain/zero/1.0/	http://vertnet.org/resources/norms.html	http://essigdb.berkeley.edu/cgi/eme_query?bnhm_id=EMEC345717&one=T	EMEC	EMEC	PreservedSpecimen	EMEC345717	J. K. Liebherr	1	adult	pin	6/16/1980	United States	Nevada	Lincoln County	Pahranagat N.W.R.	3400\'	1036		37.24629	-115.10866	WGS1984				Bembidion approximatum (LeConte, 1852)	Animalia	Arthropoda	Insecta	Coleoptera	Carabidae	Bembidion	approximatum		(LeConte, 1852)
urn:catalog:EMEC:EMEC:345718		https://creativecommons.org/publicdomain/zero/1.0/	http://vertnet.org/resources/norms.html	http://essigdb.berkeley.edu/cgi/eme_query?bnhm_id=EMEC345718&one=T	EMEC	EMEC	PreservedSpecimen	EMEC345718	J. K. Liebherr	1	adult	pin	6/16/1980	United States	Nevada	Lincoln County	Pahranagat N.W.R.	3400\'	1036		37.24629	-115.10866	WGS1984				Bembidion approximatum (LeConte, 1852)	Animalia	Arthropoda	Insecta	Coleoptera	Carabidae	Bembidion	approximatum		(LeConte, 1852)
urn:catalog:EMEC:EMEC:345701	8/15/2016	https://creativecommons.org/publicdomain/zero/1.0/	http://vertnet.org/resources/norms.html	http://essigdb.berkeley.edu/cgi/eme_query?bnhm_id=EMEC345701&one=T	EMEC	EMEC	PreservedSpecimen	EMEC345701	J. K. Liebherr	1	adult	pin	6/15/1980	United States	Nevada	Nye County	Springdale, 1.0 mi. S	3400\'	1036		37.02993	-116.75695	WGS1984				Bembidion approximatum (LeConte, 1852)	Animalia	Arthropoda	Insecta	Coleoptera	Carabidae	Bembidion	approximatum		(LeConte, 1852)
urn:catalog:EMEC:EMEC:345719		https://creativecommons.org/publicdomain/zero/1.0/	http://vertnet.org/resources/norms.html	http://essigdb.berkeley.edu/cgi/eme_query?bnhm_id=EMEC345719&one=T	EMEC	EMEC	PreservedSpecimen	EMEC345719	J. K. Liebherr	1	adult	pin	6/16/1980	United States	Nevada	Lincoln County	Pahranagat N.W.R.	3400\'	1036		37.24629	-115.10866	WGS1984				Bembidion approximatum (LeConte, 1852)	Animalia	Arthropoda	Insecta	Coleoptera	Carabidae	Bembidion	approximatum		(LeConte, 1852)
urn:catalog:EMEC:EMEC:345720		https://creativecommons.org/publicdomain/zero/1.0/	http://vertnet.org/resources/norms.html	http://essigdb.berkeley.edu/cgi/eme_query?bnhm_id=EMEC345720&one=T	EMEC	EMEC	PreservedSpecimen	EMEC345720	J. K. Liebherr	1	adult	pin	6/16/1980	United States	Nevada	Lincoln County	Pahranagat N.W.R.	3400\'	1036		37.24629	-115.10866	WGS1984				Bembidion approximatum (LeConte, 1852)	Animalia	Arthropoda	Insecta	Coleoptera	Carabidae	Bembidion	approximatum		(LeConte, 1852)
urn:catalog:EMEC:EMEC:345721		https://creativecommons.org/publicdomain/zero/1.0/	http://vertnet.org/resources/norms.html	http://essigdb.berkeley.edu/cgi/eme_query?bnhm_id=EMEC345721&one=T	EMEC	EMEC	PreservedSpecimen	EMEC345721	J. K. Liebherr	1	adult	pin	6/16/1980	United States	Nevada	Lincoln County	Pahranagat N.W.R.	3400\'	1036		37.24629	-115.10866	WGS1984				Bembidion approximatum (LeConte, 1852)	Animalia	Arthropoda	Insecta	Coleoptera	Carabidae	Bembidion	approximatum		(LeConte, 1852)
urn:catalog:EMEC:EMEC:345722		https://creativecommons.org/publicdomain/zero/1.0/	http://vertnet.org/resources/norms.html	http://essigdb.berkeley.edu/cgi/eme_query?bnhm_id=EMEC345722&one=T	EMEC	EMEC	PreservedSpecimen	EMEC345722	J. K. Liebherr	1	adult	pin	6/16/1980	United States	Nevada	Lincoln County	Pahranagat N.W.R.	3400\'	1036		37.24629	-115.10866	WGS1984				Bembidion approximatum (LeConte, 1852)	Animalia	Arthropoda	Insecta	Coleoptera	Carabidae	Bembidion	approximatum		(LeConte, 1852)
urn:catalog:EMEC:EMEC:345723		https://creativecommons.org/publicdomain/zero/1.0/	http://vertnet.org/resources/norms.html	http://essigdb.berkeley.edu/cgi/eme_query?bnhm_id=EMEC345723&one=T	EMEC	EMEC	PreservedSpecimen	EMEC345723	J. K. Liebherr	1	adult	pin	6/16/1980	United States	Nevada	Lincoln County	Pahranagat N.W.R.	3400\'	1036		37.24629	-115.10866	WGS1984				Bembidion approximatum (LeConte, 1852)	Animalia	Arthropoda	Insecta	Coleoptera	Carabidae	Bembidion	approximatum		(LeConte, 1852)
urn:catalog:EMEC:EMEC:345724		https://creativecommons.org/publicdomain/zero/1.0/	http://vertnet.org/resources/norms.html	http://essigdb.berkeley.edu/cgi/eme_query?bnhm_id=EMEC345724&one=T	EMEC	EMEC	PreservedSpecimen	EMEC345724	J. K. Liebherr	1	adult	pin	6/16/1980	United States	Nevada	Lincoln County	Pahranagat N.W.R.	3400\'	1036		37.24629	-115.10866	WGS1984				Bembidion approximatum (LeConte, 1852)	Animalia	Arthropoda	Insecta	Coleoptera	Carabidae	Bembidion	approximatum		(LeConte, 1852)
urn:catalog:EMEC:EMEC:345725		https://creativecommons.org/publicdomain/zero/1.0/	http://vertnet.org/resources/norms.html	http://essigdb.berkeley.edu/cgi/eme_query?bnhm_id=EMEC345725&one=T	EMEC	EMEC	PreservedSpecimen	EMEC345725	J. K. Liebherr	1	adult	pin	6/16/1980	United States	Nevada	Lincoln County	Pahranagat N.W.R.	3400\'	1036		37.24629	-115.10866	WGS1984				Bembidion approximatum (LeConte, 1852)	Animalia	Arthropoda	Insecta	Coleoptera	Carabidae	Bembidion	approximatum		(LeConte, 1852)
urn:catalog:EMEC:EMEC:345726		https://creativecommons.org/publicdomain/zero/1.0/	http://vertnet.org/resources/norms.html	http://essigdb.berkeley.edu/cgi/eme_query?bnhm_id=EMEC345726&one=T	EMEC	EMEC	PreservedSpecimen	EMEC345726	J. K. Liebherr	1	adult	pin	6/16/1980	United States	Nevada	Lincoln County	Pahranagat N.W.R.	3400\'	1036		37.24629	-115.10866	WGS1984				Bembidion approximatum (LeConte, 1852)	Animalia	Arthropoda	Insecta	Coleoptera	Carabidae	Bembidion	approximatum		(LeConte, 1852)
urn:catalog:EMEC:EMEC:345727		https://creativecommons.org/publicdomain/zero/1.0/	http://vertnet.org/resources/norms.html	http://essigdb.berkeley.edu/cgi/eme_query?bnhm_id=EMEC345727&one=T	EMEC	EMEC	PreservedSpecimen	EMEC345727	J. K. Liebherr	1	adult	pin	6/16/1980	United States	Nevada	Lincoln County	Pahranagat N.W.R.	3400\'	1036		37.24629	-115.10866	WGS1984				Bembidion approximatum (LeConte, 1852)	Animalia	Arthropoda	Insecta	Coleoptera	Carabidae	Bembidion	approximatum		(LeConte, 1852)
urn:catalog:EMEC:EMEC:345728		https://creativecommons.org/publicdomain/zero/1.0/	http://vertnet.org/resources/norms.html	http://essigdb.berkeley.edu/cgi/eme_query?bnhm_id=EMEC345728&one=T	EMEC	EMEC	PreservedSpecimen	EMEC345728	J. K. Liebherr	1	adult	pin	6/16/1980	United States	Nevada	Lincoln County	Pahranagat N.W.R.	3400\'	1036		37.24629	-115.10866	WGS1984				Bembidion approximatum (LeConte, 1852)	Animalia	Arthropoda	Insecta	Coleoptera	Carabidae	Bembidion	approximatum		(LeConte, 1852)
urn:catalog:EMEC:EMEC:345702	8/15/2016	https://creativecommons.org/publicdomain/zero/1.0/	http://vertnet.org/resources/norms.html	http://essigdb.berkeley.edu/cgi/eme_query?bnhm_id=EMEC345702&one=T	EMEC	EMEC	PreservedSpecimen	EMEC345702	J. K. Liebherr	1	adult	pin	6/15/1980	United States	Nevada	Nye County	Springdale, 1.0 mi. S	3400\'	1036		37.02993	-116.75695	WGS1984				Bembidion approximatum (LeConte, 1852)	Animalia	Arthropoda	Insecta	Coleoptera	Carabidae	Bembidion	approximatum		(LeConte, 1852)
urn:catalog:EMEC:EMEC:345729		https://creativecommons.org/publicdomain/zero/1.0/	http://vertnet.org/resources/norms.html	http://essigdb.berkeley.edu/cgi/eme_query?bnhm_id=EMEC345729&one=T	EMEC	EMEC	PreservedSpecimen	EMEC345729	J. K. Liebherr	1	adult	pin	6/16/1980	United States	Nevada	Lincoln County	Pahranagat N.W.R.	3400\'	1036		37.24629	-115.10866	WGS1984				Bembidion approximatum (LeConte, 1852)	Animalia	Arthropoda	Insecta	Coleoptera	Carabidae	Bembidion	approximatum		(LeConte, 1852)
urn:catalog:EMEC:EMEC:345730		https://creativecommons.org/publicdomain/zero/1.0/	http://vertnet.org/resources/norms.html	http://essigdb.berkeley.edu/cgi/eme_query?bnhm_id=EMEC345730&one=T	EMEC	EMEC	PreservedSpecimen	EMEC345730	J. K. Liebherr	1	adult	pin	6/16/1980	United States	Nevada	Lincoln County	Pahranagat N.W.R.	3400\'	1036		37.24629	-115.10866	WGS1984				Bembidion approximatum (LeConte, 1852)	Animalia	Arthropoda	Insecta	Coleoptera	Carabidae	Bembidion	approximatum		(LeConte, 1852)
urn:catalog:EMEC:EMEC:345731		https://creativecommons.org/publicdomain/zero/1.0/	http://vertnet.org/resources/norms.html	http://essigdb.berkeley.edu/cgi/eme_query?bnhm_id=EMEC345731&one=T	EMEC	EMEC	PreservedSpecimen	EMEC345731	J. K. Liebherr	1	adult	pin	6/16/1980	United States	Nevada	Lincoln County	Pahranagat N.W.R.	3400\'	1036		37.24629	-115.10866	WGS1984				Bembidion approximatum (LeConte, 1852)	Animalia	Arthropoda	Insecta	Coleoptera	Carabidae	Bembidion	approximatum		(LeConte, 1852)
urn:catalog:EMEC:EMEC:345732		https://creativecommons.org/publicdomain/zero/1.0/	http://vertnet.org/resources/norms.html	http://essigdb.berkeley.edu/cgi/eme_query?bnhm_id=EMEC345732&one=T	EMEC	EMEC	PreservedSpecimen	EMEC345732	J. K. Liebherr	1	adult	pin	6/16/1980	United States	Nevada	Lincoln County	Pahranagat N.W.R.	3400\'	1036		37.24629	-115.10866	WGS1984				Bembidion approximatum (LeConte, 1852)	Animalia	Arthropoda	Insecta	Coleoptera	Carabidae	Bembidion	approximatum		(LeConte, 1852)
urn:catalog:EMEC:EMEC:345703	8/15/2016	https://creativecommons.org/publicdomain/zero/1.0/	http://vertnet.org/resources/norms.html	http://essigdb.berkeley.edu/cgi/eme_query?bnhm_id=EMEC345703&one=T	EMEC	EMEC	PreservedSpecimen	EMEC345703	J. K. Liebherr	1	adult	pin	6/15/1980	United States	Nevada	Nye County	Springdale, 1.0 mi. S	3400\'	1036		37.02993	-116.75695	WGS1984				Bembidion approximatum (LeConte, 1852)	Animalia	Arthropoda	Insecta	Coleoptera	Carabidae	Bembidion	approximatum		(LeConte, 1852)
urn:catalog:EMEC:EMEC:345704		https://creativecommons.org/publicdomain/zero/1.0/	http://vertnet.org/resources/norms.html	http://essigdb.berkeley.edu/cgi/eme_query?bnhm_id=EMEC345704&one=T	EMEC	EMEC	PreservedSpecimen	EMEC345704	J. K. Liebherr	1	adult	pin	6/18/1980	United States	Nevada	Elko County	Ruby Valley @ Franklin R.	6200\'	1890		40.36001	-115.44789	WGS1984				Bembidion approximatum (LeConte, 1852)	Animalia	Arthropoda	Insecta	Coleoptera	Carabidae	Bembidion	approximatum		(LeConte, 1852)
urn:catalog:EMEC:EMEC:345705		https://creativecommons.org/publicdomain/zero/1.0/	http://vertnet.org/resources/norms.html	http://essigdb.berkeley.edu/cgi/eme_query?bnhm_id=EMEC345705&one=T	EMEC	EMEC	PreservedSpecimen	EMEC345705	J. K. Liebherr	1	adult	pin	6/18/1980	United States	Nevada	Elko County	Ruby Valley @ Franklin R.	6200\'	1890		40.36001	-115.44789	WGS1984				Bembidion approximatum (LeConte, 1852)	Animalia	Arthropoda	Insecta	Coleoptera	Carabidae	Bembidion	approximatum		(LeConte, 1852)
urn:catalog:EMEC:EMEC:345706		https://creativecommons.org/publicdomain/zero/1.0/	http://vertnet.org/resources/norms.html	http://essigdb.berkeley.edu/cgi/eme_query?bnhm_id=EMEC345706&one=T	EMEC	EMEC	PreservedSpecimen	EMEC345706	J. K. Liebherr	1	adult	pin	6/18/1980	United States	Nevada	Elko County	Ruby Valley @ Franklin R.	6200\'	1890		40.36001	-115.44789	WGS1984				Bembidion approximatum (LeConte, 1852)	Animalia	Arthropoda	Insecta	Coleoptera	Carabidae	Bembidion	approximatum		(LeConte, 1852)
urn:catalog:EMEC:EMEC:345707		https://creativecommons.org/publicdomain/zero/1.0/	http://vertnet.org/resources/norms.html	http://essigdb.berkeley.edu/cgi/eme_query?bnhm_id=EMEC345707&one=T	EMEC	EMEC	PreservedSpecimen	EMEC345707	J. K. Liebherr	1	adult	pin	6/18/1980	United States	Nevada	Elko County	Ruby Valley @ Franklin R.	6200\'	1890		40.36001	-115.44789	WGS1984				Bembidion approximatum (LeConte, 1852)	Animalia	Arthropoda	Insecta	Coleoptera	Carabidae	Bembidion	approximatum		(LeConte, 1852)
urn:catalog:EMEC:EMEC:345708		https://creativecommons.org/publicdomain/zero/1.0/	http://vertnet.org/resources/norms.html	http://essigdb.berkeley.edu/cgi/eme_query?bnhm_id=EMEC345708&one=T	EMEC	EMEC	PreservedSpecimen	EMEC345708	J. K. Liebherr	1	adult	pin	6/18/1980	United States	Nevada	Elko County	Ruby Valley @ Franklin R.	6200\'	1890		40.36001	-115.44789	WGS1984				Bembidion approximatum (LeConte, 1852)	Animalia	Arthropoda	Insecta	Coleoptera	Carabidae	Bembidion	approximatum		(LeConte, 1852)
urn:catalog:EMEC:EMEC:344881		https://creativecommons.org/publicdomain/zero/1.0/	http://vertnet.org/resources/norms.html	http://essigdb.berkeley.edu/cgi/eme_query?bnhm_id=EMEC344881&one=T	EMEC	EMEC	PreservedSpecimen	EMEC344881	Kipling Will, Rolf Aalbu	1	adult	pin	6/2/2012	United States	Nevada	Lander County	rt722 at Campbell Creek		2050		39.2653	-117.6864	WGS1984	10			Bembidion concolor (Kirby, 1837)	Animalia	Arthropoda	Insecta	Coleoptera	Carabidae	Bembidion	concolor		(Kirby, 1837)
urn:catalog:EMEC:EMEC:344882		https://creativecommons.org/publicdomain/zero/1.0/	http://vertnet.org/resources/norms.html	http://essigdb.berkeley.edu/cgi/eme_query?bnhm_id=EMEC344882&one=T	EMEC	EMEC	PreservedSpecimen	EMEC344882	Kipling Will, Rolf Aalbu	1	adult	pin	6/2/2012	United States	Nevada	Lander County	rt722 at Campbell Creek		2050		39.2653	-117.6864	WGS1984	10			Bembidion concolor (Kirby, 1837)	Animalia	Arthropoda	Insecta	Coleoptera	Carabidae	Bembidion	concolor		(Kirby, 1837)
urn:catalog:EMEC:EMEC:344883		https://creativecommons.org/publicdomain/zero/1.0/	http://vertnet.org/resources/norms.html	http://essigdb.berkeley.edu/cgi/eme_query?bnhm_id=EMEC344883&one=T	EMEC	EMEC	PreservedSpecimen	EMEC344883	Kipling Will, Rolf Aalbu	1	adult	pin	6/2/2012	United States	Nevada	Lander County	rt722 at Campbell Creek		2050		39.2653	-117.6864	WGS1984	10			Bembidion concolor (Kirby, 1837)	Animalia	Arthropoda	Insecta	Coleoptera	Carabidae	Bembidion	concolor		(Kirby, 1837)
urn:catalog:EMEC:EMEC:344884		https://creativecommons.org/publicdomain/zero/1.0/	http://vertnet.org/resources/norms.html	http://essigdb.berkeley.edu/cgi/eme_query?bnhm_id=EMEC344884&one=T	EMEC	EMEC	PreservedSpecimen	EMEC344884	Kipling Will, Rolf Aalbu	1	adult	pin	6/2/2012	United States	Nevada	Churchill County	rt722 at Big Den Creek		1652		39.2928	-117.8636	WGS1984	10			Bembidion concolor (Kirby, 1837)	Animalia	Arthropoda	Insecta	Coleoptera	Carabidae	Bembidion	concolor		(Kirby, 1837)
urn:catalog:EMEC:EMEC:344885		https://creativecommons.org/publicdomain/zero/1.0/	http://vertnet.org/resources/norms.html	http://essigdb.berkeley.edu/cgi/eme_query?bnhm_id=EMEC344885&one=T	EMEC	EMEC	PreservedSpecimen	EMEC344885	Kipling Will, Rolf Aalbu	1	adult	pin	6/2/2012	United States	Nevada	Churchill County	rt722 at Big Den Creek		1652		39.2928	-117.8636	WGS1984	10			Bembidion concolor (Kirby, 1837)	Animalia	Arthropoda	Insecta	Coleoptera	Carabidae	Bembidion	concolor		(Kirby, 1837)
urn:catalog:EMEC:EMEC:344886		https://creativecommons.org/publicdomain/zero/1.0/	http://vertnet.org/resources/norms.html	http://essigdb.berkeley.edu/cgi/eme_query?bnhm_id=EMEC344886&one=T	EMEC	EMEC	PreservedSpecimen	EMEC344886	Kipling Will, Rolf Aalbu	1	adult	pin	6/2/2012	United States	Nevada	Churchill County	rt722 at Big Den Creek		1652		39.2928	-117.8636	WGS1984	10			Bembidion concolor (Kirby, 1837)	Animalia	Arthropoda	Insecta	Coleoptera	Carabidae	Bembidion	concolor		(Kirby, 1837)
urn:catalog:EMEC:EMEC:344887	2/14/2016	https://creativecommons.org/publicdomain/zero/1.0/	http://vertnet.org/resources/norms.html	http://essigdb.berkeley.edu/cgi/eme_query?bnhm_id=EMEC344887&one=T	EMEC	EMEC	PreservedSpecimen	EMEC344887	Kipling Will, Frank Hsu, Riva Madan	1	adult	pin	6/13/2015	United States	Nevada	White Pine County	Great Basin National Park, Dead Lake		2904		38.93556	-114.27417	WGS1984	10			Bembidion concolor (Kirby, 1837)	Animalia	Arthropoda	Insecta	Coleoptera	Carabidae	Bembidion	concolor		(Kirby, 1837)
urn:catalog:EMEC:EMEC:344888	2/14/2016	https://creativecommons.org/publicdomain/zero/1.0/	http://vertnet.org/resources/norms.html	http://essigdb.berkeley.edu/cgi/eme_query?bnhm_id=EMEC344888&one=T	EMEC	EMEC	PreservedSpecimen	EMEC344888	Kipling Will, Frank Hsu, Riva Madan	1	adult	pin	6/13/2015	United States	Nevada	White Pine County	Great Basin National Park, Dead Lake		2904		38.93556	-114.27417	WGS1984	10			Bembidion concolor (Kirby, 1837)	Animalia	Arthropoda	Insecta	Coleoptera	Carabidae	Bembidion	concolor		(Kirby, 1837)
urn:catalog:EMEC:EMEC:344889	2/14/2016	https://creativecommons.org/publicdomain/zero/1.0/	http://vertnet.org/resources/norms.html	http://essigdb.berkeley.edu/cgi/eme_query?bnhm_id=EMEC344889&one=T	EMEC	EMEC	PreservedSpecimen	EMEC344889	Kipling Will, Frank Hsu, Riva Madan	1	adult	pin	6/13/2015	United States	Nevada	White Pine County	Great Basin National Park, Dead Lake		2904		38.93556	-114.27417	WGS1984	10			Bembidion concolor (Kirby, 1837)	Animalia	Arthropoda	Insecta	Coleoptera	Carabidae	Bembidion	concolor		(Kirby, 1837)
urn:catalog:EMEC:EMEC:1137672	4/5/2016	https://creativecommons.org/publicdomain/zero/1.0/	http://vertnet.org/resources/norms.html	http://essigdb.berkeley.edu/cgi/eme_query?bnhm_id=EMEC1137672&one=T	EMEC	EMEC	PreservedSpecimen	EMEC1137672	C. J. Lyon	1	adult	pin	7/1/1992	United States	Nevada	Washoe County	South end of Pyramid Lake	1140m	1140		39.89654	-119.46346	WGS1984	6213			Bembidion ephippigerum (LeConte, 1852)	Animalia	Arthropoda	Insecta	Coleoptera	Carabidae	Bembidion	ephippigerum		(LeConte, 1852)
urn:catalog:OSAC:OSAC:2002997		https://creativecommons.org/publicdomain/zero/1.0/	http://vertnet.org/resources/norms.html	http://essigdb.berkeley.edu/cgi/eme_query?bnhm_id=OSAC2002997&one=T	OSAC	OSAC	PreservedSpecimen	OSAC2002997	Kipling Will	1	adult	pin	6/12/2009	United States	Nevada	Elko County	Ruby Mtns		2173		40.33278	-115.52229	WGS1984				Bembidion fuchsii Blaisdell, 1902	Animalia	Arthropoda	Insecta	Coleoptera	Carabidae	Bembidion	fuchsii		Blaisdell, 1902
urn:catalog:EMEC:EMEC:344744	4/5/2016	https://creativecommons.org/publicdomain/zero/1.0/	http://vertnet.org/resources/norms.html	http://essigdb.berkeley.edu/cgi/eme_query?bnhm_id=EMEC344744&one=T	EMEC	EMEC	PreservedSpecimen	EMEC344744	J. Doyen	1			7/26/1976	United States	Nevada	Elko County	Ruby Marsh Road, Bureau of Land Management camp				40.15367	-115.5001	WGS1984	500			Bembidion graphicum Casey, 1918	Animalia	Arthropoda	Insecta	Coleoptera	Carabidae	Bembidion	graphicum		Casey, 1918
urn:catalog:EMEC:EMEC:1139211	4/5/2016	https://creativecommons.org/publicdomain/zero/1.0/	http://vertnet.org/resources/norms.html	http://essigdb.berkeley.edu/cgi/eme_query?bnhm_id=EMEC1139211&one=T	EMEC	EMEC	PreservedSpecimen	EMEC1139211	S.M. Clark	1	adult	pin	6/15/2006	United States	Nevada	White Pine County	Silver Creek above Silver Creek Reservoir	5600ft	1706.88		39.1	-114.15	unknown				Bembidion graphicum Casey, 1918	Animalia	Arthropoda	Insecta	Coleoptera	Carabidae	Bembidion	graphicum		Casey, 1918
urn:catalog:EMEC:EMEC:1139212	4/5/2016	https://creativecommons.org/publicdomain/zero/1.0/	http://vertnet.org/resources/norms.html	http://essigdb.berkeley.edu/cgi/eme_query?bnhm_id=EMEC1139212&one=T	EMEC	EMEC	PreservedSpecimen	EMEC1139212	S.M. Clark	1	adult	pin	6/15/2006	United States	Nevada	White Pine County	Silver Creek above Silver Creek Reservoir	5600ft	1706.88		39.1	-114.15	unknown				Bembidion graphicum Casey, 1918	Animalia	Arthropoda	Insecta	Coleoptera	Carabidae	Bembidion	graphicum		Casey, 1918
urn:catalog:EMEC:EMEC:345742		https://creativecommons.org/publicdomain/zero/1.0/	http://vertnet.org/resources/norms.html	http://essigdb.berkeley.edu/cgi/eme_query?bnhm_id=EMEC345742&one=T	EMEC	EMEC	PreservedSpecimen	EMEC345742	J. K. Liebherr	1	adult	pin	6/10/1980	United States	Nevada	Lyon County	Carson R. at Weeks	4500\'	1372		39.29321	-119.25134	WGS1984				Bembidion horni Hayward, 1897	Animalia	Arthropoda	Insecta	Coleoptera	Carabidae	Bembidion	horni		Hayward, 1897
urn:catalog:EMEC:EMEC:345743		https://creativecommons.org/publicdomain/zero/1.0/	http://vertnet.org/resources/norms.html	http://essigdb.berkeley.edu/cgi/eme_query?bnhm_id=EMEC345743&one=T	EMEC	EMEC	PreservedSpecimen	EMEC345743	J. K. Liebherr	1	adult	pin	6/10/1980	United States	Nevada	Lyon County	Carson R. at Weeks	4500\'	1372		39.29321	-119.25134	WGS1984				Bembidion horni Hayward, 1897	Animalia	Arthropoda	Insecta	Coleoptera	Carabidae	Bembidion	horni		Hayward, 1897
urn:catalog:OSAC:OSAC:2003336		https://creativecommons.org/publicdomain/zero/1.0/	http://vertnet.org/resources/norms.html	http://essigdb.berkeley.edu/cgi/eme_query?bnhm_id=OSAC2003336&one=T	OSAC	OSAC	PreservedSpecimen	OSAC2003336	Kipling Will, Rolf Aalbu	1	adult	pin	6/4/2012	United States	Nevada	Lander County	Groves Lake		2267		39.2397	-117.1639	WGS1984				Bembidion incrematum LeConte, 1860	Animalia	Arthropoda	Insecta	Coleoptera	Carabidae	Bembidion	incrematum		LeConte, 1860
urn:catalog:EMEC:EMEC:1139258	12/21/2016	https://creativecommons.org/publicdomain/zero/1.0/	http://vertnet.org/resources/norms.html	http://essigdb.berkeley.edu/cgi/eme_query?bnhm_id=EMEC1139258&one=T	EMEC	EMEC	PreservedSpecimen	EMEC1139258	S.M. Clark, Richard W. Baumann	1	adult	pin	11/11/1998	United States	Nevada	Nye County	Ash Meadows, Amargosa Valley				36.4252	-116.36526	WGS1984	5000			Bembidion incrematum LeConte, 1860	Animalia	Arthropoda	Insecta	Coleoptera	Carabidae	Bembidion	incrematum		LeConte, 1860
urn:catalog:EMEC:EMEC:345744		https://creativecommons.org/publicdomain/zero/1.0/	http://vertnet.org/resources/norms.html	http://essigdb.berkeley.edu/cgi/eme_query?bnhm_id=EMEC345744&one=T	EMEC	EMEC	PreservedSpecimen	EMEC345744	J. K. Liebherr	1	adult	pin	6/26/1980	United States	Nevada	Elko County	Humboldt R. at Halleck	5400\'	1646		40.95096	-115.44769	WGS1984				Bembidion incrematum LeConte, 1860	Animalia	Arthropoda	Insecta	Coleoptera	Carabidae	Bembidion	incrematum		LeConte, 1860
urn:catalog:OSAC:OSAC:2003004		https://creativecommons.org/publicdomain/zero/1.0/	http://vertnet.org/resources/norms.html	http://essigdb.berkeley.edu/cgi/eme_query?bnhm_id=OSAC2003004&one=T	OSAC	OSAC	PreservedSpecimen	OSAC2003004	Matthew C. Brandley, Ainsley Seago, Kipling Will	1	adult	pin	9/18/2005	United States	Nevada	Eureka County	I-80W bridge 1.6 mi E exit 254 (Dunphy), Humboldt River		1408		40.70516	-116.53118	WGS1984				Bembidion intermedium (Kirby, 1837)	Animalia	Arthropoda	Insecta	Coleoptera	Carabidae	Bembidion	intermedium		(Kirby, 1837)
urn:catalog:OSAC:OSAC:2003362		https://creativecommons.org/publicdomain/zero/1.0/	http://vertnet.org/resources/norms.html	http://essigdb.berkeley.edu/cgi/eme_query?bnhm_id=OSAC2003362&one=T	OSAC	OSAC	PreservedSpecimen	OSAC2003362	Matthew C. Brandley, Ainsley Seago, Kipling Will	1	adult	pin	9/18/2005	United States	Nevada	Eureka County	I-80W bridge 1.6 mi E exit 254 (Dunphy), Humboldt River		1408		40.70516	-116.53118	WGS1984				Bembidion intermedium (Kirby, 1837)	Animalia	Arthropoda	Insecta	Coleoptera	Carabidae	Bembidion	intermedium		(Kirby, 1837)
urn:catalog:EMEC:EMEC:1137805	10/10/2016	https://creativecommons.org/publicdomain/zero/1.0/	http://vertnet.org/resources/norms.html	http://essigdb.berkeley.edu/cgi/eme_query?bnhm_id=EMEC1137805&one=T	EMEC	EMEC	PreservedSpecimen	EMEC1137805	Kipling Will, Frank Hsu, Riva Madan	1			6/12/2015	United States	Nevada	White Pine County	Great Basin Nat. Pk., Teresa Lake		3140		39.0025	-114.31222	WGS1984	10			Bembidion laxatum Casey, 1918	Animalia	Arthropoda	Insecta	Coleoptera	Carabidae	Bembidion	laxatum		Casey, 1918
urn:catalog:EMEC:EMEC:1137806	10/10/2016	https://creativecommons.org/publicdomain/zero/1.0/	http://vertnet.org/resources/norms.html	http://essigdb.berkeley.edu/cgi/eme_query?bnhm_id=EMEC1137806&one=T	EMEC	EMEC	PreservedSpecimen	EMEC1137806	Kipling Will, Frank Hsu, Riva Madan	1			6/12/2015	United States	Nevada	White Pine County	Great Basin Nat. Pk., Teresa Lake		3140		39.0025	-114.31222	WGS1984	10			Bembidion laxatum Casey, 1918	Animalia	Arthropoda	Insecta	Coleoptera	Carabidae	Bembidion	laxatum		Casey, 1918
urn:catalog:EMEC:EMEC:1137803	10/13/2016	https://creativecommons.org/publicdomain/zero/1.0/	http://vertnet.org/resources/norms.html	http://essigdb.berkeley.edu/cgi/eme_query?bnhm_id=EMEC1137803&one=T	EMEC	EMEC	PreservedSpecimen	EMEC1137803	Kipling Will, Frank Hsu, Riva Madan	1			6/12/2015	United States	Nevada	White Pine County	Great Basin Nat. Pk., Teresa Lake		3140		39.0025	-114.31222	WGS1984	10			Bembidion laxatum Casey, 1918	Animalia	Arthropoda	Insecta	Coleoptera	Carabidae	Bembidion	laxatum		Casey, 1918
urn:catalog:EMEC:EMEC:1137804	10/13/2016	https://creativecommons.org/publicdomain/zero/1.0/	http://vertnet.org/resources/norms.html	http://essigdb.berkeley.edu/cgi/eme_query?bnhm_id=EMEC1137804&one=T	EMEC	EMEC	PreservedSpecimen	EMEC1137804	Kipling Will, Frank Hsu, Riva Madan	1			6/12/2015	United States	Nevada	White Pine County	Great Basin Nat. Pk., Teresa Lake		3140		39.0025	-114.31222	WGS1984	10			Bembidion laxatum Casey, 1918	Animalia	Arthropoda	Insecta	Coleoptera	Carabidae	Bembidion	laxatum		Casey, 1918
urn:catalog:EMEC:EMEC:1137807	10/13/2016	https://creativecommons.org/publicdomain/zero/1.0/	http://vertnet.org/resources/norms.html	http://essigdb.berkeley.edu/cgi/eme_query?bnhm_id=EMEC1137807&one=T	EMEC	EMEC	PreservedSpecimen	EMEC1137807	Kipling Will, Frank Hsu, Riva Madan	1			6/12/2015	United States	Nevada	White Pine County	Great Basin Nat. Pk., Teresa Lake		3140		39.0025	-114.31222	WGS1984	10			Bembidion laxatum Casey, 1918	Animalia	Arthropoda	Insecta	Coleoptera	Carabidae	Bembidion	laxatum		Casey, 1918
urn:catalog:EMEC:EMEC:1137808	10/13/2016	https://creativecommons.org/publicdomain/zero/1.0/	http://vertnet.org/resources/norms.html	http://essigdb.berkeley.edu/cgi/eme_query?bnhm_id=EMEC1137808&one=T	EMEC	EMEC	PreservedSpecimen	EMEC1137808	Kipling Will, Frank Hsu, Riva Madan	1			6/12/2015	United States	Nevada	White Pine County	Great Basin Nat. Pk., Teresa Lake		3140		39.0025	-114.31222	WGS1984	10			Bembidion laxatum Casey, 1918	Animalia	Arthropoda	Insecta	Coleoptera	Carabidae	Bembidion	laxatum		Casey, 1918
urn:catalog:EMEC:EMEC:344014	12/20/2016	https://creativecommons.org/publicdomain/zero/1.0/	http://vertnet.org/resources/norms.html	http://essigdb.berkeley.edu/cgi/eme_query?bnhm_id=EMEC344014&one=T	EMEC	EMEC	PreservedSpecimen	EMEC344014	B Brotherson, C. Campbell	1	adult	pin	9/12/2009	United States	Nevada	White Pine County	Great Basin National Park, Teresa Lake	10381\'	3164		39.0025	-114.31222	WGS1984	100			Bembidion laxatum Casey, 1918	Animalia	Arthropoda	Insecta	Coleoptera	Carabidae	Bembidion	laxatum		Casey, 1918
urn:catalog:EMEC:EMEC:344015	12/20/2016	https://creativecommons.org/publicdomain/zero/1.0/	http://vertnet.org/resources/norms.html	http://essigdb.berkeley.edu/cgi/eme_query?bnhm_id=EMEC344015&one=T	EMEC	EMEC	PreservedSpecimen	EMEC344015	B Brotherson, C. Campbell	1	adult	pin	9/12/2009	United States	Nevada	White Pine County	Great Basin National Park, Teresa Lake	10381\'	3164		39.0025	-114.31222	WGS1984	100			Bembidion laxatum Casey, 1918	Animalia	Arthropoda	Insecta	Coleoptera	Carabidae	Bembidion	laxatum		Casey, 1918
urn:catalog:EMEC:EMEC:344016	12/20/2016	https://creativecommons.org/publicdomain/zero/1.0/	http://vertnet.org/resources/norms.html	http://essigdb.berkeley.edu/cgi/eme_query?bnhm_id=EMEC344016&one=T	EMEC	EMEC	PreservedSpecimen	EMEC344016	B Brotherson, C. Campbell	1	adult	pin	9/12/2009	United States	Nevada	White Pine County	Great Basin National Park, Teresa Lake	10381\'	3164		39.0025	-114.31222	WGS1984	100			Bembidion laxatum Casey, 1918	Animalia	Arthropoda	Insecta	Coleoptera	Carabidae	Bembidion	laxatum		Casey, 1918
urn:catalog:OSAC:OSAC:2002153		https://creativecommons.org/publicdomain/zero/1.0/	http://vertnet.org/resources/norms.html	http://essigdb.berkeley.edu/cgi/eme_query?bnhm_id=OSAC2002153&one=T	OSAC	OSAC	PreservedSpecimen	OSAC2002153	David R. Maddison, A. Elizabeth Arnold	1	adult	pin	5/25/2000	United States	Nevada	Douglas County	Spooner Summitt Rest Area		2175		39.1041	-119.8943	WGS1984				Bembidion mutatum Gemminger and Harold, 1868	Animalia	Arthropoda	Insecta	Coleoptera	Carabidae	Bembidion	mutatum		Gemminger and Harold, 1868
urn:catalog:EMEC:EMEC:344895		https://creativecommons.org/publicdomain/zero/1.0/	http://vertnet.org/resources/norms.html	http://essigdb.berkeley.edu/cgi/eme_query?bnhm_id=EMEC344895&one=T	EMEC	EMEC	PreservedSpecimen	EMEC344895	Kipling Will, Rolf Aalbu	1	adult	pin	6/2/2012	United States	Nevada	Churchill County	rt722 at Big Den Creek		1652		39.2928	-117.8636	WGS1984	10			Bembidion nebraskense LeConte, 1863	Animalia	Arthropoda	Insecta	Coleoptera	Carabidae	Bembidion	nebraskense		LeConte, 1863
urn:catalog:EMEC:EMEC:344896		https://creativecommons.org/publicdomain/zero/1.0/	http://vertnet.org/resources/norms.html	http://essigdb.berkeley.edu/cgi/eme_query?bnhm_id=EMEC344896&one=T	EMEC	EMEC	PreservedSpecimen	EMEC344896	Kipling Will, Rolf Aalbu	1	adult	pin	6/2/2012	United States	Nevada	Churchill County	rt722 at Big Den Creek		1652		39.2928	-117.8636	WGS1984	10			Bembidion nebraskense LeConte, 1863	Animalia	Arthropoda	Insecta	Coleoptera	Carabidae	Bembidion	nebraskense		LeConte, 1863
urn:catalog:EMEC:EMEC:344897		https://creativecommons.org/publicdomain/zero/1.0/	http://vertnet.org/resources/norms.html	http://essigdb.berkeley.edu/cgi/eme_query?bnhm_id=EMEC344897&one=T	EMEC	EMEC	PreservedSpecimen	EMEC344897	Kipling Will, Rolf Aalbu	1	adult	pin	6/4/2012	United States	Nevada	Lander County	North Fork Big Creek		2335		39.3583	-117.0953	WGS1984	10			Bembidion nebraskense LeConte, 1863	Animalia	Arthropoda	Insecta	Coleoptera	Carabidae	Bembidion	nebraskense		LeConte, 1863
urn:catalog:EMEC:EMEC:344898		https://creativecommons.org/publicdomain/zero/1.0/	http://vertnet.org/resources/norms.html	http://essigdb.berkeley.edu/cgi/eme_query?bnhm_id=EMEC344898&one=T	EMEC	EMEC	PreservedSpecimen	EMEC344898	Kipling Will, Rolf Aalbu	1	adult	pin	6/4/2012	United States	Nevada	Lander County	North Fork Big Creek		2335		39.3583	-117.0953	WGS1984	10			Bembidion nebraskense LeConte, 1863	Animalia	Arthropoda	Insecta	Coleoptera	Carabidae	Bembidion	nebraskense		LeConte, 1863
urn:catalog:EMEC:EMEC:344899		https://creativecommons.org/publicdomain/zero/1.0/	http://vertnet.org/resources/norms.html	http://essigdb.berkeley.edu/cgi/eme_query?bnhm_id=EMEC344899&one=T	EMEC	EMEC	PreservedSpecimen	EMEC344899	Kipling Will, Rolf Aalbu	1	adult	pin	6/4/2012	United States	Nevada	Lander County	North Fork Big Creek		2335		39.3583	-117.0953	WGS1984	10			Bembidion nebraskense LeConte, 1863	Animalia	Arthropoda	Insecta	Coleoptera	Carabidae	Bembidion	nebraskense		LeConte, 1863
urn:catalog:EMEC:EMEC:344750		https://creativecommons.org/publicdomain/zero/1.0/	http://vertnet.org/resources/norms.html	http://essigdb.berkeley.edu/cgi/eme_query?bnhm_id=EMEC344750&one=T	EMEC	EMEC	PreservedSpecimen	EMEC344750	Kipling Will, Rolf Aalbu	1	adult	pin	6/2/2012	United States	Nevada	Lander County	rt722 at Campbell Creek		2050		39.2653	-117.6864	WGS1984	10			Bembidion nebraskense LeConte, 1863	Animalia	Arthropoda	Insecta	Coleoptera	Carabidae	Bembidion	nebraskense		LeConte, 1863
urn:catalog:EMEC:EMEC:344751		https://creativecommons.org/publicdomain/zero/1.0/	http://vertnet.org/resources/norms.html	http://essigdb.berkeley.edu/cgi/eme_query?bnhm_id=EMEC344751&one=T	EMEC	EMEC	PreservedSpecimen	EMEC344751	Kipling Will, Rolf Aalbu	1	adult	pin	6/2/2012	United States	Nevada	Lander County	rt722 at Campbell Creek		2050		39.2653	-117.6864	WGS1984	10			Bembidion nebraskense LeConte, 1863	Animalia	Arthropoda	Insecta	Coleoptera	Carabidae	Bembidion	nebraskense		LeConte, 1863
urn:catalog:EMEC:EMEC:344752		https://creativecommons.org/publicdomain/zero/1.0/	http://vertnet.org/resources/norms.html	http://essigdb.berkeley.edu/cgi/eme_query?bnhm_id=EMEC344752&one=T	EMEC	EMEC	PreservedSpecimen	EMEC344752	Kipling Will, Rolf Aalbu	1	adult	pin	6/2/2012	United States	Nevada	Lander County	rt722 at Campbell Creek		2050		39.2653	-117.6864	WGS1984	10			Bembidion nebraskense LeConte, 1863	Animalia	Arthropoda	Insecta	Coleoptera	Carabidae	Bembidion	nebraskense		LeConte, 1863
urn:catalog:EMEC:EMEC:344753		https://creativecommons.org/publicdomain/zero/1.0/	http://vertnet.org/resources/norms.html	http://essigdb.berkeley.edu/cgi/eme_query?bnhm_id=EMEC344753&one=T	EMEC	EMEC	PreservedSpecimen	EMEC344753	Kipling Will, Rolf Aalbu	1	adult	pin	6/2/2012	United States	Nevada	Lander County	rt722 at Campbell Creek		2050		39.2653	-117.6864	WGS1984	10			Bembidion nebraskense LeConte, 1863	Animalia	Arthropoda	Insecta	Coleoptera	Carabidae	Bembidion	nebraskense		LeConte, 1863
urn:catalog:EMEC:EMEC:344754		https://creativecommons.org/publicdomain/zero/1.0/	http://vertnet.org/resources/norms.html	http://essigdb.berkeley.edu/cgi/eme_query?bnhm_id=EMEC344754&one=T	EMEC	EMEC	PreservedSpecimen	EMEC344754	Kipling Will, Rolf Aalbu	1	adult	pin	6/2/2012	United States	Nevada	Lander County	rt722 at Campbell Creek		2050		39.2653	-117.6864	WGS1984	10			Bembidion nebraskense LeConte, 1863	Animalia	Arthropoda	Insecta	Coleoptera	Carabidae	Bembidion	nebraskense		LeConte, 1863
urn:catalog:EMEC:EMEC:344755		https://creativecommons.org/publicdomain/zero/1.0/	http://vertnet.org/resources/norms.html	http://essigdb.berkeley.edu/cgi/eme_query?bnhm_id=EMEC344755&one=T	EMEC	EMEC	PreservedSpecimen	EMEC344755	Kipling Will, Rolf Aalbu	1	adult	pin	6/2/2012	United States	Nevada	Lander County	rt722 at Campbell Creek		2050		39.2653	-117.6864	WGS1984	10			Bembidion nebraskense LeConte, 1863	Animalia	Arthropoda	Insecta	Coleoptera	Carabidae	Bembidion	nebraskense		LeConte, 1863
urn:catalog:EMEC:EMEC:344756		https://creativecommons.org/publicdomain/zero/1.0/	http://vertnet.org/resources/norms.html	http://essigdb.berkeley.edu/cgi/eme_query?bnhm_id=EMEC344756&one=T	EMEC	EMEC	PreservedSpecimen	EMEC344756	Kipling Will, Rolf Aalbu	1	adult	pin	6/2/2012	United States	Nevada	Lander County	rt722 at Campbell Creek		2050		39.2653	-117.6864	WGS1984	10			Bembidion nebraskense LeConte, 1863	Animalia	Arthropoda	Insecta	Coleoptera	Carabidae	Bembidion	nebraskense		LeConte, 1863
urn:catalog:EMEC:EMEC:344757		https://creativecommons.org/publicdomain/zero/1.0/	http://vertnet.org/resources/norms.html	http://essigdb.berkeley.edu/cgi/eme_query?bnhm_id=EMEC344757&one=T	EMEC	EMEC	PreservedSpecimen	EMEC344757	Kipling Will, Rolf Aalbu	1	adult	pin	6/2/2012	United States	Nevada	Lander County	rt722 at Campbell Creek		2050		39.2653	-117.6864	WGS1984	10			Bembidion nebraskense LeConte, 1863	Animalia	Arthropoda	Insecta	Coleoptera	Carabidae	Bembidion	nebraskense		LeConte, 1863
urn:catalog:EMEC:EMEC:344758		https://creativecommons.org/publicdomain/zero/1.0/	http://vertnet.org/resources/norms.html	http://essigdb.berkeley.edu/cgi/eme_query?bnhm_id=EMEC344758&one=T	EMEC	EMEC	PreservedSpecimen	EMEC344758	Kipling Will, Rolf Aalbu	1	adult	pin	6/2/2012	United States	Nevada	Lander County	rt722 at Campbell Creek		2050		39.2653	-117.6864	WGS1984	10			Bembidion nebraskense LeConte, 1863	Animalia	Arthropoda	Insecta	Coleoptera	Carabidae	Bembidion	nebraskense		LeConte, 1863
urn:catalog:EMEC:EMEC:344759	2/14/2016	https://creativecommons.org/publicdomain/zero/1.0/	http://vertnet.org/resources/norms.html	http://essigdb.berkeley.edu/cgi/eme_query?bnhm_id=EMEC344759&one=T	EMEC	EMEC	PreservedSpecimen	EMEC344759	Kipling Will, Frank Hsu, Riva Madan	1	adult	pin	6/12/2015	United States	Nevada	White Pine County	Great Basin National Park, Snake Creek		2163		38.91639	-114.18917	WGS1984	10			Bembidion nebraskense LeConte, 1863	Animalia	Arthropoda	Insecta	Coleoptera	Carabidae	Bembidion	nebraskense		LeConte, 1863
urn:catalog:EMEC:EMEC:344760		https://creativecommons.org/publicdomain/zero/1.0/	http://vertnet.org/resources/norms.html	http://essigdb.berkeley.edu/cgi/eme_query?bnhm_id=EMEC344760&one=T	EMEC	EMEC	PreservedSpecimen	EMEC344760	Kipling Will, Rolf Aalbu	1	adult	pin	6/3/2012	United States	Nevada	Lander County	North Fork Big Creek		2267		39.3453	-117.1061	WGS1984	10			Bembidion nebraskense LeConte, 1863	Animalia	Arthropoda	Insecta	Coleoptera	Carabidae	Bembidion	nebraskense		LeConte, 1863
urn:catalog:EMEC:EMEC:344890		https://creativecommons.org/publicdomain/zero/1.0/	http://vertnet.org/resources/norms.html	http://essigdb.berkeley.edu/cgi/eme_query?bnhm_id=EMEC344890&one=T	EMEC	EMEC	PreservedSpecimen	EMEC344890	Kipling Will, Rolf Aalbu	1	adult	pin	6/2/2012	United States	Nevada	Churchill County	rt722 at Big Den Creek		1652		39.2928	-117.8636	WGS1984	10			Bembidion nebraskense LeConte, 1863	Animalia	Arthropoda	Insecta	Coleoptera	Carabidae	Bembidion	nebraskense		LeConte, 1863
urn:catalog:EMEC:EMEC:344891		https://creativecommons.org/publicdomain/zero/1.0/	http://vertnet.org/resources/norms.html	http://essigdb.berkeley.edu/cgi/eme_query?bnhm_id=EMEC344891&one=T	EMEC	EMEC	PreservedSpecimen	EMEC344891	Kipling Will, Rolf Aalbu	1	adult	pin	6/2/2012	United States	Nevada	Churchill County	rt722 at Big Den Creek		1652		39.2928	-117.8636	WGS1984	10			Bembidion nebraskense LeConte, 1863	Animalia	Arthropoda	Insecta	Coleoptera	Carabidae	Bembidion	nebraskense		LeConte, 1863
urn:catalog:EMEC:EMEC:344892		https://creativecommons.org/publicdomain/zero/1.0/	http://vertnet.org/resources/norms.html	http://essigdb.berkeley.edu/cgi/eme_query?bnhm_id=EMEC344892&one=T	EMEC	EMEC	PreservedSpecimen	EMEC344892	Kipling Will, Rolf Aalbu	1	adult	pin	6/2/2012	United States	Nevada	Churchill County	rt722 at Big Den Creek		1652		39.2928	-117.8636	WGS1984	10			Bembidion nebraskense LeConte, 1863	Animalia	Arthropoda	Insecta	Coleoptera	Carabidae	Bembidion	nebraskense		LeConte, 1863
urn:catalog:EMEC:EMEC:344893		https://creativecommons.org/publicdomain/zero/1.0/	http://vertnet.org/resources/norms.html	http://essigdb.berkeley.edu/cgi/eme_query?bnhm_id=EMEC344893&one=T	EMEC	EMEC	PreservedSpecimen	EMEC344893	Kipling Will, Rolf Aalbu	1	adult	pin	6/2/2012	United States	Nevada	Churchill County	rt722 at Big Den Creek		1652		39.2928	-117.8636	WGS1984	10			Bembidion nebraskense LeConte, 1863	Animalia	Arthropoda	Insecta	Coleoptera	Carabidae	Bembidion	nebraskense		LeConte, 1863
urn:catalog:EMEC:EMEC:344894		https://creativecommons.org/publicdomain/zero/1.0/	http://vertnet.org/resources/norms.html	http://essigdb.berkeley.edu/cgi/eme_query?bnhm_id=EMEC344894&one=T	EMEC	EMEC	PreservedSpecimen	EMEC344894	Kipling Will, Rolf Aalbu	1	adult	pin	6/2/2012	United States	Nevada	Churchill County	rt722 at Big Den Creek		1652		39.2928	-117.8636	WGS1984	10			Bembidion nebraskense LeConte, 1863	Animalia	Arthropoda	Insecta	Coleoptera	Carabidae	Bembidion	nebraskense		LeConte, 1863
urn:catalog:EMEC:EMEC:344795		https://creativecommons.org/publicdomain/zero/1.0/	http://vertnet.org/resources/norms.html	http://essigdb.berkeley.edu/cgi/eme_query?bnhm_id=EMEC344795&one=T	EMEC	EMEC	PreservedSpecimen	EMEC344795	Kipling Will, Rolf Aalbu	1	adult	pin	6/2/2012	United States	Nevada	Lander County	rt722 at Campbell Creek		2050		39.2653	-117.6864	WGS1984	10			Bembidion nevadense Ulke, 1875	Animalia	Arthropoda	Insecta	Coleoptera	Carabidae	Bembidion	nevadense		Ulke, 1875
urn:catalog:EMEC:EMEC:344854	2/14/2016	https://creativecommons.org/publicdomain/zero/1.0/	http://vertnet.org/resources/norms.html	http://essigdb.berkeley.edu/cgi/eme_query?bnhm_id=EMEC344854&one=T	EMEC	EMEC	PreservedSpecimen	EMEC344854	Kipling Will, Frank Hsu, Riva Madan	1	adult	pin	6/12/2015	United States	Nevada	White Pine County	Great Basin National Park, Snake Creek		2163		38.91639	-114.18917	WGS1984	10			Bembidion nevadense Ulke, 1875	Animalia	Arthropoda	Insecta	Coleoptera	Carabidae	Bembidion	nevadense		Ulke, 1875
urn:catalog:EMEC:EMEC:344855	2/14/2016	https://creativecommons.org/publicdomain/zero/1.0/	http://vertnet.org/resources/norms.html	http://essigdb.berkeley.edu/cgi/eme_query?bnhm_id=EMEC344855&one=T	EMEC	EMEC	PreservedSpecimen	EMEC344855	Kipling Will, Frank Hsu, Riva Madan	1	adult	pin	6/12/2015	United States	Nevada	White Pine County	Great Basin National Park, Snake Creek		2163		38.91639	-114.18917	WGS1984	10			Bembidion nevadense Ulke, 1875	Animalia	Arthropoda	Insecta	Coleoptera	Carabidae	Bembidion	nevadense		Ulke, 1875
urn:catalog:EMEC:EMEC:344856	2/14/2016	https://creativecommons.org/publicdomain/zero/1.0/	http://vertnet.org/resources/norms.html	http://essigdb.berkeley.edu/cgi/eme_query?bnhm_id=EMEC344856&one=T	EMEC	EMEC	PreservedSpecimen	EMEC344856	Kipling Will, Frank Hsu, Riva Madan	1	adult	pin	6/12/2015	United States	Nevada	White Pine County	Great Basin National Park, Snake Creek		2163		38.91639	-114.18917	WGS1984	10			Bembidion nevadense Ulke, 1875	Animalia	Arthropoda	Insecta	Coleoptera	Carabidae	Bembidion	nevadense		Ulke, 1875
urn:catalog:EMEC:EMEC:344857	2/14/2016	https://creativecommons.org/publicdomain/zero/1.0/	http://vertnet.org/resources/norms.html	http://essigdb.berkeley.edu/cgi/eme_query?bnhm_id=EMEC344857&one=T	EMEC	EMEC	PreservedSpecimen	EMEC344857	Kipling Will, Frank Hsu, Riva Madan	1	adult	pin	6/12/2015	United States	Nevada	White Pine County	Great Basin National Park, Snake Creek		2163		38.91639	-114.18917	WGS1984	10			Bembidion nevadense Ulke, 1875	Animalia	Arthropoda	Insecta	Coleoptera	Carabidae	Bembidion	nevadense		Ulke, 1875
urn:catalog:EMEC:EMEC:344858	2/14/2016	https://creativecommons.org/publicdomain/zero/1.0/	http://vertnet.org/resources/norms.html	http://essigdb.berkeley.edu/cgi/eme_query?bnhm_id=EMEC344858&one=T	EMEC	EMEC	PreservedSpecimen	EMEC344858	Kipling Will, Frank Hsu, Riva Madan	1	adult	pin	6/12/2015	United States	Nevada	White Pine County	Great Basin National Park, Snake Creek		2163		38.91639	-114.18917	WGS1984	10			Bembidion nevadense Ulke, 1875	Animalia	Arthropoda	Insecta	Coleoptera	Carabidae	Bembidion	nevadense		Ulke, 1875
urn:catalog:EMEC:EMEC:344859	2/14/2016	https://creativecommons.org/publicdomain/zero/1.0/	http://vertnet.org/resources/norms.html	http://essigdb.berkeley.edu/cgi/eme_query?bnhm_id=EMEC344859&one=T	EMEC	EMEC	PreservedSpecimen	EMEC344859	Kipling Will, Frank Hsu, Riva Madan	1	adult	pin	6/12/2015	United States	Nevada	White Pine County	Great Basin National Park, Snake Creek		2163		38.91639	-114.18917	WGS1984	10			Bembidion nevadense Ulke, 1875	Animalia	Arthropoda	Insecta	Coleoptera	Carabidae	Bembidion	nevadense		Ulke, 1875
urn:catalog:EMEC:EMEC:344860	2/14/2016	https://creativecommons.org/publicdomain/zero/1.0/	http://vertnet.org/resources/norms.html	http://essigdb.berkeley.edu/cgi/eme_query?bnhm_id=EMEC344860&one=T	EMEC	EMEC	PreservedSpecimen	EMEC344860	Kipling Will, Frank Hsu, Riva Madan	1	adult	pin	6/12/2015	United States	Nevada	White Pine County	Great Basin National Park, Snake Creek		2163		38.91639	-114.18917	WGS1984	10			Bembidion nevadense Ulke, 1875	Animalia	Arthropoda	Insecta	Coleoptera	Carabidae	Bembidion	nevadense		Ulke, 1875
urn:catalog:EMEC:EMEC:344861	2/14/2016	https://creativecommons.org/publicdomain/zero/1.0/	http://vertnet.org/resources/norms.html	http://essigdb.berkeley.edu/cgi/eme_query?bnhm_id=EMEC344861&one=T	EMEC	EMEC	PreservedSpecimen	EMEC344861	Kipling Will, Frank Hsu, Riva Madan	1	adult	pin	6/12/2015	United States	Nevada	White Pine County	Great Basin National Park, Lower Wheeler Peak Trail		3120		39.005	-114.31	WGS1984	10			Bembidion nevadense Ulke, 1875	Animalia	Arthropoda	Insecta	Coleoptera	Carabidae	Bembidion	nevadense		Ulke, 1875
urn:catalog:EMEC:EMEC:344862	2/14/2016	https://creativecommons.org/publicdomain/zero/1.0/	http://vertnet.org/resources/norms.html	http://essigdb.berkeley.edu/cgi/eme_query?bnhm_id=EMEC344862&one=T	EMEC	EMEC	PreservedSpecimen	EMEC344862	Kipling Will, Frank Hsu, Riva Madan	1	adult	pin	6/11/2015	United States	Nevada	White Pine County	Great Basin National Park, Lehman Creek		2035		39.01139	-114.21222	WGS1984	10			Bembidion nevadense Ulke, 1875	Animalia	Arthropoda	Insecta	Coleoptera	Carabidae	Bembidion	nevadense		Ulke, 1875
urn:catalog:EMEC:EMEC:344863	2/14/2016	https://creativecommons.org/publicdomain/zero/1.0/	http://vertnet.org/resources/norms.html	http://essigdb.berkeley.edu/cgi/eme_query?bnhm_id=EMEC344863&one=T	EMEC	EMEC	PreservedSpecimen	EMEC344863	Kipling Will, Frank Hsu, Riva Madan	1	adult	pin	6/11/2015	United States	Nevada	White Pine County	Great Basin National Park, Lehman Creek		2035		39.01139	-114.21222	WGS1984	10			Bembidion nevadense Ulke, 1875	Animalia	Arthropoda	Insecta	Coleoptera	Carabidae	Bembidion	nevadense		Ulke, 1875
urn:catalog:EMEC:EMEC:344796	2/14/2016	https://creativecommons.org/publicdomain/zero/1.0/	http://vertnet.org/resources/norms.html	http://essigdb.berkeley.edu/cgi/eme_query?bnhm_id=EMEC344796&one=T	EMEC	EMEC	PreservedSpecimen	EMEC344796	Kipling Will, Frank Hsu, Riva Madan	1	adult	pin	6/12/2015	United States	Nevada	White Pine County	Great Basin National Park, Snake Creek		2163		38.91639	-114.18917	WGS1984	10			Bembidion nevadense Ulke, 1875	Animalia	Arthropoda	Insecta	Coleoptera	Carabidae	Bembidion	nevadense		Ulke, 1875
urn:catalog:EMEC:EMEC:344864	2/14/2016	https://creativecommons.org/publicdomain/zero/1.0/	http://vertnet.org/resources/norms.html	http://essigdb.berkeley.edu/cgi/eme_query?bnhm_id=EMEC344864&one=T	EMEC	EMEC	PreservedSpecimen	EMEC344864	Kipling Will, Frank Hsu, Riva Madan	1	adult	pin	6/11/2015	United States	Nevada	White Pine County	Great Basin National Park, Lehman Creek		2035		39.01139	-114.21222	WGS1984	10			Bembidion nevadense Ulke, 1875	Animalia	Arthropoda	Insecta	Coleoptera	Carabidae	Bembidion	nevadense		Ulke, 1875
urn:catalog:EMEC:EMEC:344865	2/14/2016	https://creativecommons.org/publicdomain/zero/1.0/	http://vertnet.org/resources/norms.html	http://essigdb.berkeley.edu/cgi/eme_query?bnhm_id=EMEC344865&one=T	EMEC	EMEC	PreservedSpecimen	EMEC344865	Kipling Will, Frank Hsu, Riva Madan	1	adult	pin	6/11/2015	United States	Nevada	White Pine County	Great Basin National Park, Lehman Creek		2035		39.01139	-114.21222	WGS1984	10			Bembidion nevadense Ulke, 1875	Animalia	Arthropoda	Insecta	Coleoptera	Carabidae	Bembidion	nevadense		Ulke, 1875
urn:catalog:EMEC:EMEC:344866	2/14/2016	https://creativecommons.org/publicdomain/zero/1.0/	http://vertnet.org/resources/norms.html	http://essigdb.berkeley.edu/cgi/eme_query?bnhm_id=EMEC344866&one=T	EMEC	EMEC	PreservedSpecimen	EMEC344866	Kipling Will, Frank Hsu, Riva Madan	1	adult	pin	6/11/2015	United States	Nevada	White Pine County	Great Basin National Park, Lehman Creek		2035		39.01139	-114.21222	WGS1984	10			Bembidion nevadense Ulke, 1875	Animalia	Arthropoda	Insecta	Coleoptera	Carabidae	Bembidion	nevadense		Ulke, 1875
urn:catalog:EMEC:EMEC:344867	2/14/2016	https://creativecommons.org/publicdomain/zero/1.0/	http://vertnet.org/resources/norms.html	http://essigdb.berkeley.edu/cgi/eme_query?bnhm_id=EMEC344867&one=T	EMEC	EMEC	PreservedSpecimen	EMEC344867	Kipling Will, Frank Hsu, Riva Madan	1	adult	pin	6/12/2015	United States	Nevada	White Pine County	Great Basin National Park, Teresa Lake		3140		39.0025	-114.31222	WGS1984	10			Bembidion nevadense Ulke, 1875	Animalia	Arthropoda	Insecta	Coleoptera	Carabidae	Bembidion	nevadense		Ulke, 1875
urn:catalog:EMEC:EMEC:344868	2/14/2016	https://creativecommons.org/publicdomain/zero/1.0/	http://vertnet.org/resources/norms.html	http://essigdb.berkeley.edu/cgi/eme_query?bnhm_id=EMEC344868&one=T	EMEC	EMEC	PreservedSpecimen	EMEC344868	Kipling Will, Frank Hsu, Riva Madan	1	adult	pin	6/12/2015	United States	Nevada	White Pine County	Great Basin National Park, Teresa Lake		3140		39.0025	-114.31222	WGS1984	10			Bembidion nevadense Ulke, 1875	Animalia	Arthropoda	Insecta	Coleoptera	Carabidae	Bembidion	nevadense		Ulke, 1875
urn:catalog:EMEC:EMEC:344869	2/14/2016	https://creativecommons.org/publicdomain/zero/1.0/	http://vertnet.org/resources/norms.html	http://essigdb.berkeley.edu/cgi/eme_query?bnhm_id=EMEC344869&one=T	EMEC	EMEC	PreservedSpecimen	EMEC344869	Kipling Will, Frank Hsu, Riva Madan	1	adult	pin	6/12/2015	United States	Nevada	White Pine County	Great Basin National Park, Teresa Lake		3140		39.0025	-114.31222	WGS1984	10			Bembidion nevadense Ulke, 1875	Animalia	Arthropoda	Insecta	Coleoptera	Carabidae	Bembidion	nevadense		Ulke, 1875
urn:catalog:EMEC:EMEC:344870	2/14/2016	https://creativecommons.org/publicdomain/zero/1.0/	http://vertnet.org/resources/norms.html	http://essigdb.berkeley.edu/cgi/eme_query?bnhm_id=EMEC344870&one=T	EMEC	EMEC	PreservedSpecimen	EMEC344870	Kipling Will, Frank Hsu, Riva Madan	1	adult	pin	6/12/2015	United States	Nevada	White Pine County	Great Basin National Park, Teresa Lake		3140		39.0025	-114.31222	WGS1984	10			Bembidion nevadense Ulke, 1875	Animalia	Arthropoda	Insecta	Coleoptera	Carabidae	Bembidion	nevadense		Ulke, 1875
urn:catalog:EMEC:EMEC:344871	2/14/2016	https://creativecommons.org/publicdomain/zero/1.0/	http://vertnet.org/resources/norms.html	http://essigdb.berkeley.edu/cgi/eme_query?bnhm_id=EMEC344871&one=T	EMEC	EMEC	PreservedSpecimen	EMEC344871	Kipling Will, Frank Hsu, Riva Madan	1	adult	pin	6/12/2015	United States	Nevada	White Pine County	Great Basin National Park, Teresa Lake		3140		39.0025	-114.31222	WGS1984	10			Bembidion nevadense Ulke, 1875	Animalia	Arthropoda	Insecta	Coleoptera	Carabidae	Bembidion	nevadense		Ulke, 1875
urn:catalog:EMEC:EMEC:344872	2/14/2016	https://creativecommons.org/publicdomain/zero/1.0/	http://vertnet.org/resources/norms.html	http://essigdb.berkeley.edu/cgi/eme_query?bnhm_id=EMEC344872&one=T	EMEC	EMEC	PreservedSpecimen	EMEC344872	Kipling Will, Frank Hsu, Riva Madan	1	adult	pin	6/13/2015	United States	Nevada	White Pine County	Great Basin National Park, Dead Lake		2904		38.93556	-114.27417	WGS1984	10			Bembidion nevadense Ulke, 1875	Animalia	Arthropoda	Insecta	Coleoptera	Carabidae	Bembidion	nevadense		Ulke, 1875
urn:catalog:EMEC:EMEC:344873	2/14/2016	https://creativecommons.org/publicdomain/zero/1.0/	http://vertnet.org/resources/norms.html	http://essigdb.berkeley.edu/cgi/eme_query?bnhm_id=EMEC344873&one=T	EMEC	EMEC	PreservedSpecimen	EMEC344873	Kipling Will, Frank Hsu, Riva Madan	1	adult	pin	6/13/2015	United States	Nevada	White Pine County	Great Basin National Park, Dead Lake		2904		38.93556	-114.27417	WGS1984	10			Bembidion nevadense Ulke, 1875	Animalia	Arthropoda	Insecta	Coleoptera	Carabidae	Bembidion	nevadense		Ulke, 1875
urn:catalog:EMEC:EMEC:344797	2/14/2016	https://creativecommons.org/publicdomain/zero/1.0/	http://vertnet.org/resources/norms.html	http://essigdb.berkeley.edu/cgi/eme_query?bnhm_id=EMEC344797&one=T	EMEC	EMEC	PreservedSpecimen	EMEC344797	Kipling Will, Frank Hsu, Riva Madan	1	adult	pin	6/12/2015	United States	Nevada	White Pine County	Great Basin National Park, Snake Creek		2163		38.91639	-114.18917	WGS1984	10			Bembidion nevadense Ulke, 1875	Animalia	Arthropoda	Insecta	Coleoptera	Carabidae	Bembidion	nevadense		Ulke, 1875
urn:catalog:EMEC:EMEC:344874	2/14/2016	https://creativecommons.org/publicdomain/zero/1.0/	http://vertnet.org/resources/norms.html	http://essigdb.berkeley.edu/cgi/eme_query?bnhm_id=EMEC344874&one=T	EMEC	EMEC	PreservedSpecimen	EMEC344874	Kipling Will, Frank Hsu, Riva Madan	1	adult	pin	6/13/2015	United States	Nevada	White Pine County	Great Basin National Park, Dead Lake		2904		38.93556	-114.27417	WGS1984	10			Bembidion nevadense Ulke, 1875	Animalia	Arthropoda	Insecta	Coleoptera	Carabidae	Bembidion	nevadense		Ulke, 1875
urn:catalog:EMEC:EMEC:344875	2/14/2016	https://creativecommons.org/publicdomain/zero/1.0/	http://vertnet.org/resources/norms.html	http://essigdb.berkeley.edu/cgi/eme_query?bnhm_id=EMEC344875&one=T	EMEC	EMEC	PreservedSpecimen	EMEC344875	Kipling Will, Frank Hsu, Riva Madan	1	adult	pin	6/13/2015	United States	Nevada	White Pine County	Great Basin National Park, Dead Lake		2904		38.93556	-114.27417	WGS1984	10			Bembidion nevadense Ulke, 1875	Animalia	Arthropoda	Insecta	Coleoptera	Carabidae	Bembidion	nevadense		Ulke, 1875
urn:catalog:EMEC:EMEC:344876	2/14/2016	https://creativecommons.org/publicdomain/zero/1.0/	http://vertnet.org/resources/norms.html	http://essigdb.berkeley.edu/cgi/eme_query?bnhm_id=EMEC344876&one=T	EMEC	EMEC	PreservedSpecimen	EMEC344876	Kipling Will, Frank Hsu, Riva Madan	1	adult	pin	6/13/2015	United States	Nevada	White Pine County	Great Basin National Park, Dead Lake		2904		38.93556	-114.27417	WGS1984	10			Bembidion nevadense Ulke, 1875	Animalia	Arthropoda	Insecta	Coleoptera	Carabidae	Bembidion	nevadense		Ulke, 1875
urn:catalog:EMEC:EMEC:344877	2/14/2016	https://creativecommons.org/publicdomain/zero/1.0/	http://vertnet.org/resources/norms.html	http://essigdb.berkeley.edu/cgi/eme_query?bnhm_id=EMEC344877&one=T	EMEC	EMEC	PreservedSpecimen	EMEC344877	Kipling Will, Frank Hsu, Riva Madan	1	adult	pin	6/13/2015	United States	Nevada	White Pine County	Great Basin National Park, Dead Lake		2904		38.93556	-114.27417	WGS1984	10			Bembidion nevadense Ulke, 1875	Animalia	Arthropoda	Insecta	Coleoptera	Carabidae	Bembidion	nevadense		Ulke, 1875
urn:catalog:EMEC:EMEC:344878	2/14/2016	https://creativecommons.org/publicdomain/zero/1.0/	http://vertnet.org/resources/norms.html	http://essigdb.berkeley.edu/cgi/eme_query?bnhm_id=EMEC344878&one=T	EMEC	EMEC	PreservedSpecimen	EMEC344878	Kipling Will, Frank Hsu, Riva Madan	1	adult	pin	6/13/2015	United States	Nevada	White Pine County	Great Basin National Park, Dead Lake		2904		38.93556	-114.27417	WGS1984	10			Bembidion nevadense Ulke, 1875	Animalia	Arthropoda	Insecta	Coleoptera	Carabidae	Bembidion	nevadense		Ulke, 1875
urn:catalog:EMEC:EMEC:344879	2/14/2016	https://creativecommons.org/publicdomain/zero/1.0/	http://vertnet.org/resources/norms.html	http://essigdb.berkeley.edu/cgi/eme_query?bnhm_id=EMEC344879&one=T	EMEC	EMEC	PreservedSpecimen	EMEC344879	Kipling Will, Frank Hsu, Riva Madan	1	adult	pin	6/13/2015	United States	Nevada	White Pine County	Great Basin National Park, Dead Lake		2904		38.93556	-114.27417	WGS1984	10			Bembidion nevadense Ulke, 1875	Animalia	Arthropoda	Insecta	Coleoptera	Carabidae	Bembidion	nevadense		Ulke, 1875
urn:catalog:EMEC:EMEC:344880	2/14/2016	https://creativecommons.org/publicdomain/zero/1.0/	http://vertnet.org/resources/norms.html	http://essigdb.berkeley.edu/cgi/eme_query?bnhm_id=EMEC344880&one=T	EMEC	EMEC	PreservedSpecimen	EMEC344880	Kipling Will, Frank Hsu, Riva Madan	1	adult	pin	6/13/2015	United States	Nevada	White Pine County	Great Basin National Park, Dead Lake		2904		38.93556	-114.27417	WGS1984	10			Bembidion nevadense Ulke, 1875	Animalia	Arthropoda	Insecta	Coleoptera	Carabidae	Bembidion	nevadense		Ulke, 1875
urn:catalog:EMEC:EMEC:344831	2/14/2016	https://creativecommons.org/publicdomain/zero/1.0/	http://vertnet.org/resources/norms.html	http://essigdb.berkeley.edu/cgi/eme_query?bnhm_id=EMEC344831&one=T	EMEC	EMEC	PreservedSpecimen	EMEC344831	Kipling Will, Frank Hsu, Riva Madan	1	adult	pin	6/13/2015	United States	Nevada	White Pine County	Great Basin National Park, Dead Lake		2904		38.93556	-114.27417	WGS1984	10			Bembidion nevadense Ulke, 1875	Animalia	Arthropoda	Insecta	Coleoptera	Carabidae	Bembidion	nevadense		Ulke, 1875
urn:catalog:EMEC:EMEC:344832	2/14/2016	https://creativecommons.org/publicdomain/zero/1.0/	http://vertnet.org/resources/norms.html	http://essigdb.berkeley.edu/cgi/eme_query?bnhm_id=EMEC344832&one=T	EMEC	EMEC	PreservedSpecimen	EMEC344832	Kipling Will, Frank Hsu, Riva Madan	1	adult	pin	6/13/2015	United States	Nevada	White Pine County	Great Basin National Park, Dead Lake		2904		38.93556	-114.27417	WGS1984	10			Bembidion nevadense Ulke, 1875	Animalia	Arthropoda	Insecta	Coleoptera	Carabidae	Bembidion	nevadense		Ulke, 1875
urn:catalog:EMEC:EMEC:344833	2/14/2016	https://creativecommons.org/publicdomain/zero/1.0/	http://vertnet.org/resources/norms.html	http://essigdb.berkeley.edu/cgi/eme_query?bnhm_id=EMEC344833&one=T	EMEC	EMEC	PreservedSpecimen	EMEC344833	Kipling Will, Frank Hsu, Riva Madan	1	adult	pin	6/13/2015	United States	Nevada	White Pine County	Great Basin National Park, Dead Lake		2904		38.93556	-114.27417	WGS1984	10			Bembidion nevadense Ulke, 1875	Animalia	Arthropoda	Insecta	Coleoptera	Carabidae	Bembidion	nevadense		Ulke, 1875
urn:catalog:EMEC:EMEC:344798	2/14/2016	https://creativecommons.org/publicdomain/zero/1.0/	http://vertnet.org/resources/norms.html	http://essigdb.berkeley.edu/cgi/eme_query?bnhm_id=EMEC344798&one=T	EMEC	EMEC	PreservedSpecimen	EMEC344798	Kipling Will, Frank Hsu, Riva Madan	1	adult	pin	6/12/2015	United States	Nevada	White Pine County	Great Basin National Park, Snake Creek		2163		38.91639	-114.18917	WGS1984	10			Bembidion nevadense Ulke, 1875	Animalia	Arthropoda	Insecta	Coleoptera	Carabidae	Bembidion	nevadense		Ulke, 1875
urn:catalog:EMEC:EMEC:344834	2/14/2016	https://creativecommons.org/publicdomain/zero/1.0/	http://vertnet.org/resources/norms.html	http://essigdb.berkeley.edu/cgi/eme_query?bnhm_id=EMEC344834&one=T	EMEC	EMEC	PreservedSpecimen	EMEC344834	Kipling Will, Frank Hsu, Riva Madan	1	adult	pin	6/13/2015	United States	Nevada	White Pine County	Great Basin National Park, Dead Lake		2904		38.93556	-114.27417	WGS1984	10			Bembidion nevadense Ulke, 1875	Animalia	Arthropoda	Insecta	Coleoptera	Carabidae	Bembidion	nevadense		Ulke, 1875
urn:catalog:EMEC:EMEC:344835	2/14/2016	https://creativecommons.org/publicdomain/zero/1.0/	http://vertnet.org/resources/norms.html	http://essigdb.berkeley.edu/cgi/eme_query?bnhm_id=EMEC344835&one=T	EMEC	EMEC	PreservedSpecimen	EMEC344835	Kipling Will, Frank Hsu, Riva Madan	1	adult	pin	6/13/2015	United States	Nevada	White Pine County	Great Basin National Park, Dead Lake		2904		38.93556	-114.27417	WGS1984	10			Bembidion nevadense Ulke, 1875	Animalia	Arthropoda	Insecta	Coleoptera	Carabidae	Bembidion	nevadense		Ulke, 1875
urn:catalog:EMEC:EMEC:344836	2/14/2016	https://creativecommons.org/publicdomain/zero/1.0/	http://vertnet.org/resources/norms.html	http://essigdb.berkeley.edu/cgi/eme_query?bnhm_id=EMEC344836&one=T	EMEC	EMEC	PreservedSpecimen	EMEC344836	Kipling Will, Frank Hsu, Riva Madan	1	adult	pin	6/13/2015	United States	Nevada	White Pine County	Great Basin National Park, Dead Lake		2904		38.93556	-114.27417	WGS1984	10			Bembidion nevadense Ulke, 1875	Animalia	Arthropoda	Insecta	Coleoptera	Carabidae	Bembidion	nevadense		Ulke, 1875
urn:catalog:EMEC:EMEC:344837	2/14/2016	https://creativecommons.org/publicdomain/zero/1.0/	http://vertnet.org/resources/norms.html	http://essigdb.berkeley.edu/cgi/eme_query?bnhm_id=EMEC344837&one=T	EMEC	EMEC	PreservedSpecimen	EMEC344837	Kipling Will, Frank Hsu, Riva Madan	1	adult	pin	6/13/2015	United States	Nevada	White Pine County	Great Basin National Park, Dead Lake		2904		38.93556	-114.27417	WGS1984	10			Bembidion nevadense Ulke, 1875	Animalia	Arthropoda	Insecta	Coleoptera	Carabidae	Bembidion	nevadense		Ulke, 1875
urn:catalog:EMEC:EMEC:344838	2/14/2016	https://creativecommons.org/publicdomain/zero/1.0/	http://vertnet.org/resources/norms.html	http://essigdb.berkeley.edu/cgi/eme_query?bnhm_id=EMEC344838&one=T	EMEC	EMEC	PreservedSpecimen	EMEC344838	Kipling Will, Frank Hsu, Riva Madan	1	adult	pin	6/13/2015	United States	Nevada	White Pine County	Great Basin National Park, Dead Lake		2904		38.93556	-114.27417	WGS1984	10			Bembidion nevadense Ulke, 1875	Animalia	Arthropoda	Insecta	Coleoptera	Carabidae	Bembidion	nevadense		Ulke, 1875
urn:catalog:EMEC:EMEC:344839	2/14/2016	https://creativecommons.org/publicdomain/zero/1.0/	http://vertnet.org/resources/norms.html	http://essigdb.berkeley.edu/cgi/eme_query?bnhm_id=EMEC344839&one=T	EMEC	EMEC	PreservedSpecimen	EMEC344839	Kipling Will, Frank Hsu, Riva Madan	1	adult	pin	6/13/2015	United States	Nevada	White Pine County	Great Basin National Park, Dead Lake		2904		38.93556	-114.27417	WGS1984	10			Bembidion nevadense Ulke, 1875	Animalia	Arthropoda	Insecta	Coleoptera	Carabidae	Bembidion	nevadense		Ulke, 1875
urn:catalog:EMEC:EMEC:344840	2/14/2016	https://creativecommons.org/publicdomain/zero/1.0/	http://vertnet.org/resources/norms.html	http://essigdb.berkeley.edu/cgi/eme_query?bnhm_id=EMEC344840&one=T	EMEC	EMEC	PreservedSpecimen	EMEC344840	Kipling Will, Frank Hsu, Riva Madan	1	adult	pin	6/13/2015	United States	Nevada	White Pine County	Great Basin National Park, Dead Lake		2904		38.93556	-114.27417	WGS1984	10			Bembidion nevadense Ulke, 1875	Animalia	Arthropoda	Insecta	Coleoptera	Carabidae	Bembidion	nevadense		Ulke, 1875
urn:catalog:EMEC:EMEC:344841	2/14/2016	https://creativecommons.org/publicdomain/zero/1.0/	http://vertnet.org/resources/norms.html	http://essigdb.berkeley.edu/cgi/eme_query?bnhm_id=EMEC344841&one=T	EMEC	EMEC	PreservedSpecimen	EMEC344841	Kipling Will, Frank Hsu, Riva Madan	1	adult	pin	6/13/2015	United States	Nevada	White Pine County	Great Basin National Park, Dead Lake		2904		38.93556	-114.27417	WGS1984	10			Bembidion nevadense Ulke, 1875	Animalia	Arthropoda	Insecta	Coleoptera	Carabidae	Bembidion	nevadense		Ulke, 1875
urn:catalog:EMEC:EMEC:344842	2/14/2016	https://creativecommons.org/publicdomain/zero/1.0/	http://vertnet.org/resources/norms.html	http://essigdb.berkeley.edu/cgi/eme_query?bnhm_id=EMEC344842&one=T	EMEC	EMEC	PreservedSpecimen	EMEC344842	Kipling Will, Frank Hsu, Riva Madan	1	adult	pin	6/13/2015	United States	Nevada	White Pine County	Great Basin National Park, Dead Lake		2904		38.93556	-114.27417	WGS1984	10			Bembidion nevadense Ulke, 1875	Animalia	Arthropoda	Insecta	Coleoptera	Carabidae	Bembidion	nevadense		Ulke, 1875
urn:catalog:EMEC:EMEC:344843	2/14/2016	https://creativecommons.org/publicdomain/zero/1.0/	http://vertnet.org/resources/norms.html	http://essigdb.berkeley.edu/cgi/eme_query?bnhm_id=EMEC344843&one=T	EMEC	EMEC	PreservedSpecimen	EMEC344843	Kipling Will, Frank Hsu, Riva Madan	1	adult	pin	6/13/2015	United States	Nevada	White Pine County	Great Basin National Park, Dead Lake		2904		38.93556	-114.27417	WGS1984	10			Bembidion nevadense Ulke, 1875	Animalia	Arthropoda	Insecta	Coleoptera	Carabidae	Bembidion	nevadense		Ulke, 1875
urn:catalog:EMEC:EMEC:344799	2/14/2016	https://creativecommons.org/publicdomain/zero/1.0/	http://vertnet.org/resources/norms.html	http://essigdb.berkeley.edu/cgi/eme_query?bnhm_id=EMEC344799&one=T	EMEC	EMEC	PreservedSpecimen	EMEC344799	Kipling Will, Frank Hsu, Riva Madan	1	adult	pin	6/12/2015	United States	Nevada	White Pine County	Great Basin National Park, Snake Creek		2163		38.91639	-114.18917	WGS1984	10			Bembidion nevadense Ulke, 1875	Animalia	Arthropoda	Insecta	Coleoptera	Carabidae	Bembidion	nevadense		Ulke, 1875
urn:catalog:EMEC:EMEC:344844	2/14/2016	https://creativecommons.org/publicdomain/zero/1.0/	http://vertnet.org/resources/norms.html	http://essigdb.berkeley.edu/cgi/eme_query?bnhm_id=EMEC344844&one=T	EMEC	EMEC	PreservedSpecimen	EMEC344844	Kipling Will, Frank Hsu, Riva Madan	1	adult	pin	6/13/2015	United States	Nevada	White Pine County	Great Basin National Park, Dead Lake		2904		38.93556	-114.27417	WGS1984	10			Bembidion nevadense Ulke, 1875	Animalia	Arthropoda	Insecta	Coleoptera	Carabidae	Bembidion	nevadense		Ulke, 1875
urn:catalog:EMEC:EMEC:344845	2/14/2016	https://creativecommons.org/publicdomain/zero/1.0/	http://vertnet.org/resources/norms.html	http://essigdb.berkeley.edu/cgi/eme_query?bnhm_id=EMEC344845&one=T	EMEC	EMEC	PreservedSpecimen	EMEC344845	Kipling Will, Frank Hsu, Riva Madan	1	adult	pin	6/13/2015	United States	Nevada	White Pine County	Great Basin National Park, Dead Lake		2904		38.93556	-114.27417	WGS1984	10			Bembidion nevadense Ulke, 1875	Animalia	Arthropoda	Insecta	Coleoptera	Carabidae	Bembidion	nevadense		Ulke, 1875
urn:catalog:EMEC:EMEC:344846	2/14/2016	https://creativecommons.org/publicdomain/zero/1.0/	http://vertnet.org/resources/norms.html	http://essigdb.berkeley.edu/cgi/eme_query?bnhm_id=EMEC344846&one=T	EMEC	EMEC	PreservedSpecimen	EMEC344846	Kipling Will, Frank Hsu, Riva Madan	1	adult	pin	6/13/2015	United States	Nevada	White Pine County	Great Basin National Park, Dead Lake		2904		38.93556	-114.27417	WGS1984	10			Bembidion nevadense Ulke, 1875	Animalia	Arthropoda	Insecta	Coleoptera	Carabidae	Bembidion	nevadense		Ulke, 1875
urn:catalog:EMEC:EMEC:344847	2/14/2016	https://creativecommons.org/publicdomain/zero/1.0/	http://vertnet.org/resources/norms.html	http://essigdb.berkeley.edu/cgi/eme_query?bnhm_id=EMEC344847&one=T	EMEC	EMEC	PreservedSpecimen	EMEC344847	Kipling Will, Frank Hsu, Riva Madan	1	adult	pin	6/13/2015	United States	Nevada	White Pine County	Great Basin National Park, Dead Lake		2904		38.93556	-114.27417	WGS1984	10			Bembidion nevadense Ulke, 1875	Animalia	Arthropoda	Insecta	Coleoptera	Carabidae	Bembidion	nevadense		Ulke, 1875
urn:catalog:EMEC:EMEC:344848	2/14/2016	https://creativecommons.org/publicdomain/zero/1.0/	http://vertnet.org/resources/norms.html	http://essigdb.berkeley.edu/cgi/eme_query?bnhm_id=EMEC344848&one=T	EMEC	EMEC	PreservedSpecimen	EMEC344848	Kipling Will, Frank Hsu, Riva Madan	1	adult	pin	6/13/2015	United States	Nevada	White Pine County	Great Basin National Park, Dead Lake		2904		38.93556	-114.27417	WGS1984	10			Bembidion nevadense Ulke, 1875	Animalia	Arthropoda	Insecta	Coleoptera	Carabidae	Bembidion	nevadense		Ulke, 1875
urn:catalog:EMEC:EMEC:344849	2/14/2016	https://creativecommons.org/publicdomain/zero/1.0/	http://vertnet.org/resources/norms.html	http://essigdb.berkeley.edu/cgi/eme_query?bnhm_id=EMEC344849&one=T	EMEC	EMEC	PreservedSpecimen	EMEC344849	Kipling Will, Frank Hsu, Riva Madan	1	adult	pin	6/13/2015	United States	Nevada	White Pine County	Great Basin National Park, Dead Lake		2904		38.93556	-114.27417	WGS1984	10			Bembidion nevadense Ulke, 1875	Animalia	Arthropoda	Insecta	Coleoptera	Carabidae	Bembidion	nevadense		Ulke, 1875
urn:catalog:EMEC:EMEC:344800	2/14/2016	https://creativecommons.org/publicdomain/zero/1.0/	http://vertnet.org/resources/norms.html	http://essigdb.berkeley.edu/cgi/eme_query?bnhm_id=EMEC344800&one=T	EMEC	EMEC	PreservedSpecimen	EMEC344800	Kipling Will, Frank Hsu, Riva Madan	1	adult	pin	6/13/2015	United States	Nevada	White Pine County	Great Basin National Park, Dead Lake		2904		38.93556	-114.27417	WGS1984	10			Bembidion nevadense Ulke, 1875	Animalia	Arthropoda	Insecta	Coleoptera	Carabidae	Bembidion	nevadense		Ulke, 1875
urn:catalog:EMEC:EMEC:344801		https://creativecommons.org/publicdomain/zero/1.0/	http://vertnet.org/resources/norms.html	http://essigdb.berkeley.edu/cgi/eme_query?bnhm_id=EMEC344801&one=T	EMEC	EMEC	PreservedSpecimen	EMEC344801	Kipling Will, Rolf Aalbu	1	adult	pin	6/2/2012	United States	Nevada	Churchill County	rt722 at Big Den Creek		1652		39.2928	-117.8636	WGS1984	10			Bembidion nevadense Ulke, 1875	Animalia	Arthropoda	Insecta	Coleoptera	Carabidae	Bembidion	nevadense		Ulke, 1875
urn:catalog:EMEC:EMEC:344802		https://creativecommons.org/publicdomain/zero/1.0/	http://vertnet.org/resources/norms.html	http://essigdb.berkeley.edu/cgi/eme_query?bnhm_id=EMEC344802&one=T	EMEC	EMEC	PreservedSpecimen	EMEC344802	Kipling Will, Rolf Aalbu	1	adult	pin	6/2/2012	United States	Nevada	Lander County	rt722 at Campbell Creek		2050		39.2653	-117.6864	WGS1984	10			Bembidion nevadense Ulke, 1875	Animalia	Arthropoda	Insecta	Coleoptera	Carabidae	Bembidion	nevadense		Ulke, 1875
urn:catalog:EMEC:EMEC:344803		https://creativecommons.org/publicdomain/zero/1.0/	http://vertnet.org/resources/norms.html	http://essigdb.berkeley.edu/cgi/eme_query?bnhm_id=EMEC344803&one=T	EMEC	EMEC	PreservedSpecimen	EMEC344803	Kipling Will, Rolf Aalbu	1	adult	pin	6/2/2012	United States	Nevada	Lander County	rt722 at Campbell Creek		2050		39.2653	-117.6864	WGS1984	10			Bembidion nevadense Ulke, 1875	Animalia	Arthropoda	Insecta	Coleoptera	Carabidae	Bembidion	nevadense		Ulke, 1875
urn:catalog:EMEC:EMEC:344850	2/14/2016	https://creativecommons.org/publicdomain/zero/1.0/	http://vertnet.org/resources/norms.html	http://essigdb.berkeley.edu/cgi/eme_query?bnhm_id=EMEC344850&one=T	EMEC	EMEC	PreservedSpecimen	EMEC344850	Kipling Will, Frank Hsu, Riva Madan	1	adult	pin	6/12/2015	United States	Nevada	White Pine County	Great Basin National Park, Snake Creek		2163		38.91639	-114.18917	WGS1984	10			Bembidion nevadense Ulke, 1875	Animalia	Arthropoda	Insecta	Coleoptera	Carabidae	Bembidion	nevadense		Ulke, 1875
urn:catalog:EMEC:EMEC:344804		https://creativecommons.org/publicdomain/zero/1.0/	http://vertnet.org/resources/norms.html	http://essigdb.berkeley.edu/cgi/eme_query?bnhm_id=EMEC344804&one=T	EMEC	EMEC	PreservedSpecimen	EMEC344804	Kipling Will, Rolf Aalbu	1	adult	pin	6/2/2012	United States	Nevada	Lander County	rt722 at Campbell Creek		2050		39.2653	-117.6864	WGS1984	10			Bembidion nevadense Ulke, 1875	Animalia	Arthropoda	Insecta	Coleoptera	Carabidae	Bembidion	nevadense		Ulke, 1875
urn:catalog:EMEC:EMEC:344805		https://creativecommons.org/publicdomain/zero/1.0/	http://vertnet.org/resources/norms.html	http://essigdb.berkeley.edu/cgi/eme_query?bnhm_id=EMEC344805&one=T	EMEC	EMEC	PreservedSpecimen	EMEC344805	Kipling Will, Rolf Aalbu	1	adult	pin	6/2/2012	United States	Nevada	Lander County	Carroll Summit		2320		39.2689	-117.7281	WGS1984	10			Bembidion nevadense Ulke, 1875	Animalia	Arthropoda	Insecta	Coleoptera	Carabidae	Bembidion	nevadense		Ulke, 1875
urn:catalog:EMEC:EMEC:344806		https://creativecommons.org/publicdomain/zero/1.0/	http://vertnet.org/resources/norms.html	http://essigdb.berkeley.edu/cgi/eme_query?bnhm_id=EMEC344806&one=T	EMEC	EMEC	PreservedSpecimen	EMEC344806	Kipling Will, Rolf Aalbu	1	adult	pin	6/2/2012	United States	Nevada	Lander County	Carroll Summit		2320		39.2689	-117.7281	WGS1984	10			Bembidion nevadense Ulke, 1875	Animalia	Arthropoda	Insecta	Coleoptera	Carabidae	Bembidion	nevadense		Ulke, 1875
urn:catalog:EMEC:EMEC:344807		https://creativecommons.org/publicdomain/zero/1.0/	http://vertnet.org/resources/norms.html	http://essigdb.berkeley.edu/cgi/eme_query?bnhm_id=EMEC344807&one=T	EMEC	EMEC	PreservedSpecimen	EMEC344807	Kipling Will, Rolf Aalbu	1	adult	pin	6/2/2012	United States	Nevada	Lander County	Carroll Summit		2320		39.2689	-117.7281	WGS1984	10			Bembidion nevadense Ulke, 1875	Animalia	Arthropoda	Insecta	Coleoptera	Carabidae	Bembidion	nevadense		Ulke, 1875
urn:catalog:EMEC:EMEC:344808		https://creativecommons.org/publicdomain/zero/1.0/	http://vertnet.org/resources/norms.html	http://essigdb.berkeley.edu/cgi/eme_query?bnhm_id=EMEC344808&one=T	EMEC	EMEC	PreservedSpecimen	EMEC344808	Kipling Will, Rolf Aalbu	1	adult	pin	6/2/2012	United States	Nevada	Lander County	Carroll Summit		2320		39.2689	-117.7281	WGS1984	10			Bembidion nevadense Ulke, 1875	Animalia	Arthropoda	Insecta	Coleoptera	Carabidae	Bembidion	nevadense		Ulke, 1875
urn:catalog:EMEC:EMEC:344809		https://creativecommons.org/publicdomain/zero/1.0/	http://vertnet.org/resources/norms.html	http://essigdb.berkeley.edu/cgi/eme_query?bnhm_id=EMEC344809&one=T	EMEC	EMEC	PreservedSpecimen	EMEC344809	Kipling Will, Rolf Aalbu	1	adult	pin	6/2/2012	United States	Nevada	Lander County	Carroll Summit		2320		39.2689	-117.7281	WGS1984	10			Bembidion nevadense Ulke, 1875	Animalia	Arthropoda	Insecta	Coleoptera	Carabidae	Bembidion	nevadense		Ulke, 1875
urn:catalog:EMEC:EMEC:344810		https://creativecommons.org/publicdomain/zero/1.0/	http://vertnet.org/resources/norms.html	http://essigdb.berkeley.edu/cgi/eme_query?bnhm_id=EMEC344810&one=T	EMEC	EMEC	PreservedSpecimen	EMEC344810	Kipling Will, Rolf Aalbu	1	adult	pin	6/2/2012	United States	Nevada	Lander County	Carroll Summit		2320		39.2689	-117.7281	WGS1984	10			Bembidion nevadense Ulke, 1875	Animalia	Arthropoda	Insecta	Coleoptera	Carabidae	Bembidion	nevadense		Ulke, 1875
urn:catalog:EMEC:EMEC:344811		https://creativecommons.org/publicdomain/zero/1.0/	http://vertnet.org/resources/norms.html	http://essigdb.berkeley.edu/cgi/eme_query?bnhm_id=EMEC344811&one=T	EMEC	EMEC	PreservedSpecimen	EMEC344811	Kipling Will, Rolf Aalbu	1	adult	pin	6/2/2012	United States	Nevada	Lander County	Carroll Summit		2320		39.2689	-117.7281	WGS1984	10			Bembidion nevadense Ulke, 1875	Animalia	Arthropoda	Insecta	Coleoptera	Carabidae	Bembidion	nevadense		Ulke, 1875
urn:catalog:EMEC:EMEC:344812		https://creativecommons.org/publicdomain/zero/1.0/	http://vertnet.org/resources/norms.html	http://essigdb.berkeley.edu/cgi/eme_query?bnhm_id=EMEC344812&one=T	EMEC	EMEC	PreservedSpecimen	EMEC344812	Kipling Will, Rolf Aalbu	1	adult	pin	6/2/2012	United States	Nevada	Lander County	Carroll Summit		2320		39.2689	-117.7281	WGS1984	10			Bembidion nevadense Ulke, 1875	Animalia	Arthropoda	Insecta	Coleoptera	Carabidae	Bembidion	nevadense		Ulke, 1875
urn:catalog:EMEC:EMEC:344813		https://creativecommons.org/publicdomain/zero/1.0/	http://vertnet.org/resources/norms.html	http://essigdb.berkeley.edu/cgi/eme_query?bnhm_id=EMEC344813&one=T	EMEC	EMEC	PreservedSpecimen	EMEC344813	Kipling Will, Rolf Aalbu	1	adult	pin	6/2/2012	United States	Nevada	Lander County	Carroll Summit		2320		39.2689	-117.7281	WGS1984	10			Bembidion nevadense Ulke, 1875	Animalia	Arthropoda	Insecta	Coleoptera	Carabidae	Bembidion	nevadense		Ulke, 1875
urn:catalog:EMEC:EMEC:344851	2/14/2016	https://creativecommons.org/publicdomain/zero/1.0/	http://vertnet.org/resources/norms.html	http://essigdb.berkeley.edu/cgi/eme_query?bnhm_id=EMEC344851&one=T	EMEC	EMEC	PreservedSpecimen	EMEC344851	Kipling Will, Frank Hsu, Riva Madan	1	adult	pin	6/12/2015	United States	Nevada	White Pine County	Great Basin National Park, Snake Creek		2163		38.91639	-114.18917	WGS1984	10			Bembidion nevadense Ulke, 1875	Animalia	Arthropoda	Insecta	Coleoptera	Carabidae	Bembidion	nevadense		Ulke, 1875
urn:catalog:EMEC:EMEC:344814		https://creativecommons.org/publicdomain/zero/1.0/	http://vertnet.org/resources/norms.html	http://essigdb.berkeley.edu/cgi/eme_query?bnhm_id=EMEC344814&one=T	EMEC	EMEC	PreservedSpecimen	EMEC344814	Kipling Will, Rolf Aalbu	1	adult	pin	6/2/2012	United States	Nevada	Lander County	Carroll Summit		2320		39.2689	-117.7281	WGS1984	10			Bembidion nevadense Ulke, 1875	Animalia	Arthropoda	Insecta	Coleoptera	Carabidae	Bembidion	nevadense		Ulke, 1875
urn:catalog:EMEC:EMEC:344815		https://creativecommons.org/publicdomain/zero/1.0/	http://vertnet.org/resources/norms.html	http://essigdb.berkeley.edu/cgi/eme_query?bnhm_id=EMEC344815&one=T	EMEC	EMEC	PreservedSpecimen	EMEC344815	Kipling Will, Rolf Aalbu	1	adult	pin	6/2/2012	United States	Nevada	Lander County	Carroll Summit		2320		39.2689	-117.7281	WGS1984	10			Bembidion nevadense Ulke, 1875	Animalia	Arthropoda	Insecta	Coleoptera	Carabidae	Bembidion	nevadense		Ulke, 1875
urn:catalog:EMEC:EMEC:344816		https://creativecommons.org/publicdomain/zero/1.0/	http://vertnet.org/resources/norms.html	http://essigdb.berkeley.edu/cgi/eme_query?bnhm_id=EMEC344816&one=T	EMEC	EMEC	PreservedSpecimen	EMEC344816	Kipling Will, Rolf Aalbu	1	adult	pin	6/2/2012	United States	Nevada	Lander County	Carroll Summit		2320		39.2689	-117.7281	WGS1984	10			Bembidion nevadense Ulke, 1875	Animalia	Arthropoda	Insecta	Coleoptera	Carabidae	Bembidion	nevadense		Ulke, 1875
urn:catalog:EMEC:EMEC:344817		https://creativecommons.org/publicdomain/zero/1.0/	http://vertnet.org/resources/norms.html	http://essigdb.berkeley.edu/cgi/eme_query?bnhm_id=EMEC344817&one=T	EMEC	EMEC	PreservedSpecimen	EMEC344817	Kipling Will, Rolf Aalbu	1	adult	pin	6/2/2012	United States	Nevada	Lander County	Carroll Summit		2320		39.2689	-117.7281	WGS1984	10			Bembidion nevadense Ulke, 1875	Animalia	Arthropoda	Insecta	Coleoptera	Carabidae	Bembidion	nevadense		Ulke, 1875
urn:catalog:EMEC:EMEC:344818		https://creativecommons.org/publicdomain/zero/1.0/	http://vertnet.org/resources/norms.html	http://essigdb.berkeley.edu/cgi/eme_query?bnhm_id=EMEC344818&one=T	EMEC	EMEC	PreservedSpecimen	EMEC344818	Kipling Will, Rolf Aalbu	1	adult	pin	6/2/2012	United States	Nevada	Lander County	Carroll Summit		2320		39.2689	-117.7281	WGS1984	10			Bembidion nevadense Ulke, 1875	Animalia	Arthropoda	Insecta	Coleoptera	Carabidae	Bembidion	nevadense		Ulke, 1875
urn:catalog:EMEC:EMEC:344819		https://creativecommons.org/publicdomain/zero/1.0/	http://vertnet.org/resources/norms.html	http://essigdb.berkeley.edu/cgi/eme_query?bnhm_id=EMEC344819&one=T	EMEC	EMEC	PreservedSpecimen	EMEC344819	Kipling Will, Rolf Aalbu	1	adult	pin	6/2/2012	United States	Nevada	Lander County	Carroll Summit		2320		39.2689	-117.7281	WGS1984	10			Bembidion nevadense Ulke, 1875	Animalia	Arthropoda	Insecta	Coleoptera	Carabidae	Bembidion	nevadense		Ulke, 1875
urn:catalog:EMEC:EMEC:344820		https://creativecommons.org/publicdomain/zero/1.0/	http://vertnet.org/resources/norms.html	http://essigdb.berkeley.edu/cgi/eme_query?bnhm_id=EMEC344820&one=T	EMEC	EMEC	PreservedSpecimen	EMEC344820	Kipling Will, Rolf Aalbu	1	adult	pin	6/2/2012	United States	Nevada	Lander County	Carroll Summit		2320		39.2689	-117.7281	WGS1984	10			Bembidion nevadense Ulke, 1875	Animalia	Arthropoda	Insecta	Coleoptera	Carabidae	Bembidion	nevadense		Ulke, 1875
urn:catalog:EMEC:EMEC:344821		https://creativecommons.org/publicdomain/zero/1.0/	http://vertnet.org/resources/norms.html	http://essigdb.berkeley.edu/cgi/eme_query?bnhm_id=EMEC344821&one=T	EMEC	EMEC	PreservedSpecimen	EMEC344821	Kipling Will, Rolf Aalbu	1	adult	pin	6/2/2012	United States	Nevada	Lander County	Carroll Summit		2320		39.2689	-117.7281	WGS1984	10			Bembidion nevadense Ulke, 1875	Animalia	Arthropoda	Insecta	Coleoptera	Carabidae	Bembidion	nevadense		Ulke, 1875
urn:catalog:EMEC:EMEC:344822		https://creativecommons.org/publicdomain/zero/1.0/	http://vertnet.org/resources/norms.html	http://essigdb.berkeley.edu/cgi/eme_query?bnhm_id=EMEC344822&one=T	EMEC	EMEC	PreservedSpecimen	EMEC344822	Kipling Will, Rolf Aalbu	1	adult	pin	6/2/2012	United States	Nevada	Lander County	Carroll Summit		2320		39.2689	-117.7281	WGS1984	10			Bembidion nevadense Ulke, 1875	Animalia	Arthropoda	Insecta	Coleoptera	Carabidae	Bembidion	nevadense		Ulke, 1875
urn:catalog:EMEC:EMEC:344823		https://creativecommons.org/publicdomain/zero/1.0/	http://vertnet.org/resources/norms.html	http://essigdb.berkeley.edu/cgi/eme_query?bnhm_id=EMEC344823&one=T	EMEC	EMEC	PreservedSpecimen	EMEC344823	Kipling Will, Rolf Aalbu	1	adult	pin	6/2/2012	United States	Nevada	Lander County	Carroll Summit		2320		39.2689	-117.7281	WGS1984	10			Bembidion nevadense Ulke, 1875	Animalia	Arthropoda	Insecta	Coleoptera	Carabidae	Bembidion	nevadense		Ulke, 1875
urn:catalog:EMEC:EMEC:344852	2/14/2016	https://creativecommons.org/publicdomain/zero/1.0/	http://vertnet.org/resources/norms.html	http://essigdb.berkeley.edu/cgi/eme_query?bnhm_id=EMEC344852&one=T	EMEC	EMEC	PreservedSpecimen	EMEC344852	Kipling Will, Frank Hsu, Riva Madan	1	adult	pin	6/12/2015	United States	Nevada	White Pine County	Great Basin National Park, Snake Creek		2163		38.91639	-114.18917	WGS1984	10			Bembidion nevadense Ulke, 1875	Animalia	Arthropoda	Insecta	Coleoptera	Carabidae	Bembidion	nevadense		Ulke, 1875
urn:catalog:EMEC:EMEC:344824		https://creativecommons.org/publicdomain/zero/1.0/	http://vertnet.org/resources/norms.html	http://essigdb.berkeley.edu/cgi/eme_query?bnhm_id=EMEC344824&one=T	EMEC	EMEC	PreservedSpecimen	EMEC344824	Kipling Will, Rolf Aalbu	1	adult	pin	6/2/2012	United States	Nevada	Lander County	Carroll Summit		2320		39.2689	-117.7281	WGS1984	10			Bembidion nevadense Ulke, 1875	Animalia	Arthropoda	Insecta	Coleoptera	Carabidae	Bembidion	nevadense		Ulke, 1875
urn:catalog:EMEC:EMEC:344825		https://creativecommons.org/publicdomain/zero/1.0/	http://vertnet.org/resources/norms.html	http://essigdb.berkeley.edu/cgi/eme_query?bnhm_id=EMEC344825&one=T	EMEC	EMEC	PreservedSpecimen	EMEC344825	Kipling Will, Rolf Aalbu	1	adult	pin	6/2/2012	United States	Nevada	Lander County	Carroll Summit		2320		39.2689	-117.7281	WGS1984	10			Bembidion nevadense Ulke, 1875	Animalia	Arthropoda	Insecta	Coleoptera	Carabidae	Bembidion	nevadense		Ulke, 1875
urn:catalog:EMEC:EMEC:344826		https://creativecommons.org/publicdomain/zero/1.0/	http://vertnet.org/resources/norms.html	http://essigdb.berkeley.edu/cgi/eme_query?bnhm_id=EMEC344826&one=T	EMEC	EMEC	PreservedSpecimen	EMEC344826	Kipling Will, Rolf Aalbu	1	adult	pin	6/2/2012	United States	Nevada	Lander County	Carroll Summit		2320		39.2689	-117.7281	WGS1984	10			Bembidion nevadense Ulke, 1875	Animalia	Arthropoda	Insecta	Coleoptera	Carabidae	Bembidion	nevadense		Ulke, 1875
urn:catalog:EMEC:EMEC:344827		https://creativecommons.org/publicdomain/zero/1.0/	http://vertnet.org/resources/norms.html	http://essigdb.berkeley.edu/cgi/eme_query?bnhm_id=EMEC344827&one=T	EMEC	EMEC	PreservedSpecimen	EMEC344827	Kipling Will, Rolf Aalbu	1	adult	pin	6/2/2012	United States	Nevada	Lander County	Carroll Summit		2320		39.2689	-117.7281	WGS1984	10			Bembidion nevadense Ulke, 1875	Animalia	Arthropoda	Insecta	Coleoptera	Carabidae	Bembidion	nevadense		Ulke, 1875
urn:catalog:EMEC:EMEC:344828		https://creativecommons.org/publicdomain/zero/1.0/	http://vertnet.org/resources/norms.html	http://essigdb.berkeley.edu/cgi/eme_query?bnhm_id=EMEC344828&one=T	EMEC	EMEC	PreservedSpecimen	EMEC344828	Kipling Will, Rolf Aalbu	1	adult	pin	6/2/2012	United States	Nevada	Lander County	Carroll Summit		2320		39.2689	-117.7281	WGS1984	10			Bembidion nevadense Ulke, 1875	Animalia	Arthropoda	Insecta	Coleoptera	Carabidae	Bembidion	nevadense		Ulke, 1875
urn:catalog:EMEC:EMEC:344853	2/14/2016	https://creativecommons.org/publicdomain/zero/1.0/	http://vertnet.org/resources/norms.html	http://essigdb.berkeley.edu/cgi/eme_query?bnhm_id=EMEC344853&one=T	EMEC	EMEC	PreservedSpecimen	EMEC344853	Kipling Will, Frank Hsu, Riva Madan	1	adult	pin	6/12/2015	United States	Nevada	White Pine County	Great Basin National Park, Snake Creek		2163		38.91639	-114.18917	WGS1984	10			Bembidion nevadense Ulke, 1875	Animalia	Arthropoda	Insecta	Coleoptera	Carabidae	Bembidion	nevadense		Ulke, 1875
urn:catalog:EMEC:EMEC:344622	12/20/2016	https://creativecommons.org/publicdomain/zero/1.0/	http://vertnet.org/resources/norms.html	http://essigdb.berkeley.edu/cgi/eme_query?bnhm_id=EMEC344622&one=T	EMEC	EMEC	PreservedSpecimen	EMEC344622	C Fisher, B Brotherson, M Coulter, C. Campbell	1	adult	pin	9/13/2009	United States	Nevada	White Pine County	Great Basin National Park, Grey Cliffs Campground				38.99026	-114.22276	WGS1984	500			Bembidion nevadense Ulke, 1875	Animalia	Arthropoda	Insecta	Coleoptera	Carabidae	Bembidion	nevadense		Ulke, 1875
urn:catalog:EMEC:EMEC:344623	12/20/2016	https://creativecommons.org/publicdomain/zero/1.0/	http://vertnet.org/resources/norms.html	http://essigdb.berkeley.edu/cgi/eme_query?bnhm_id=EMEC344623&one=T	EMEC	EMEC	PreservedSpecimen	EMEC344623	C Fisher, B Brotherson, M Coulter, C. Campbell	1	adult	pin	9/13/2009	United States	Nevada	White Pine County	Great Basin National Park, Grey Cliffs Campground				38.99026	-114.22276	WGS1984	500			Bembidion nevadense Ulke, 1875	Animalia	Arthropoda	Insecta	Coleoptera	Carabidae	Bembidion	nevadense		Ulke, 1875
urn:catalog:EMEC:EMEC:344624	12/20/2016	https://creativecommons.org/publicdomain/zero/1.0/	http://vertnet.org/resources/norms.html	http://essigdb.berkeley.edu/cgi/eme_query?bnhm_id=EMEC344624&one=T	EMEC	EMEC	PreservedSpecimen	EMEC344624	B Brotherson, C. Campbell	1	adult	pin	9/12/2009	United States	Nevada	White Pine County	Great Basin National Park, Teresa Lake	10381\'	3164		39.0025	-114.31222	WGS1984	100			Bembidion nevadense Ulke, 1875	Animalia	Arthropoda	Insecta	Coleoptera	Carabidae	Bembidion	nevadense		Ulke, 1875
urn:catalog:EMEC:EMEC:344741	12/14/2016	https://creativecommons.org/publicdomain/zero/1.0/	http://vertnet.org/resources/norms.html	http://essigdb.berkeley.edu/cgi/eme_query?bnhm_id=EMEC344741&one=T	EMEC	EMEC	PreservedSpecimen	EMEC344741	M. Brandley, A. Seago	1	adult	pin	9/18/2005	United States	Nevada	Eureka County	I-80 West, exit 254 (Dunphy exit) 1.6 miles East of bridge	1408m	1408		40.7	-116.53333	unknown				Bembidion nubiculosum Chaudoir, 1868	Animalia	Arthropoda	Insecta	Coleoptera	Carabidae	Bembidion	nubiculosum		Chaudoir, 1868
urn:catalog:EMEC:EMEC:1139210	12/14/2016	https://creativecommons.org/publicdomain/zero/1.0/	http://vertnet.org/resources/norms.html	http://essigdb.berkeley.edu/cgi/eme_query?bnhm_id=EMEC1139210&one=T	EMEC	EMEC	PreservedSpecimen	EMEC1139210	M.R. Whiting	1	adult	pin	5/9/1983	United States	Nevada	Churchill County	Carson River below Lanontan Dam				39.29884	-119.19162	WGS1984	5000			Bembidion nubiculosum Chaudoir, 1868	Animalia	Arthropoda	Insecta	Coleoptera	Carabidae	Bembidion	nubiculosum		Chaudoir, 1868
urn:catalog:OSAC:OSAC:2003253		https://creativecommons.org/publicdomain/zero/1.0/	http://vertnet.org/resources/norms.html	http://essigdb.berkeley.edu/cgi/eme_query?bnhm_id=OSAC2003253&one=T	OSAC	OSAC	PreservedSpecimen	OSAC2003253	Kipling Will, Rolf Aalbu	1	adult	pin	5/2/2012	United States	Nevada	Lander County	rt722 at Campbell Creek		2050		39.2653	-117.6864	WGS1984				Bembidion obscuripenne Blaisdell, 1902	Animalia	Arthropoda	Insecta	Coleoptera	Carabidae	Bembidion	obscuripenne		Blaisdell, 1902
urn:catalog:EMEC:EMEC:345746	8/15/2016	https://creativecommons.org/publicdomain/zero/1.0/	http://vertnet.org/resources/norms.html	http://essigdb.berkeley.edu/cgi/eme_query?bnhm_id=EMEC345746&one=T	EMEC	EMEC	PreservedSpecimen	EMEC345746	J. K. Liebherr	1	adult	pin	6/15/1980	United States	Nevada	Nye County	Springdale, 1.0 mi. S	3400\'	1036		37.02993	-116.75695	WGS1984				Bembidion obtusangulum LeConte, 1863	Animalia	Arthropoda	Insecta	Coleoptera	Carabidae	Bembidion	obtusangulum		LeConte, 1863
urn:catalog:EMEC:EMEC:345747	8/15/2016	https://creativecommons.org/publicdomain/zero/1.0/	http://vertnet.org/resources/norms.html	http://essigdb.berkeley.edu/cgi/eme_query?bnhm_id=EMEC345747&one=T	EMEC	EMEC	PreservedSpecimen	EMEC345747	J. K. Liebherr	1	adult	pin	6/15/1980	United States	Nevada	Nye County	Springdale, 1.0 mi. S	3400\'	1036		37.02993	-116.75695	WGS1984				Bembidion obtusangulum LeConte, 1863	Animalia	Arthropoda	Insecta	Coleoptera	Carabidae	Bembidion	obtusangulum		LeConte, 1863
urn:catalog:EMEC:EMEC:345748	8/15/2016	https://creativecommons.org/publicdomain/zero/1.0/	http://vertnet.org/resources/norms.html	http://essigdb.berkeley.edu/cgi/eme_query?bnhm_id=EMEC345748&one=T	EMEC	EMEC	PreservedSpecimen	EMEC345748	J. K. Liebherr	1	adult	pin	6/15/1980	United States	Nevada	Nye County	Springdale, 1.0 mi. S	3400\'	1036		37.02993	-116.75695	WGS1984				Bembidion obtusangulum LeConte, 1863	Animalia	Arthropoda	Insecta	Coleoptera	Carabidae	Bembidion	obtusangulum		LeConte, 1863
urn:catalog:EMEC:EMEC:345749		https://creativecommons.org/publicdomain/zero/1.0/	http://vertnet.org/resources/norms.html	http://essigdb.berkeley.edu/cgi/eme_query?bnhm_id=EMEC345749&one=T	EMEC	EMEC	PreservedSpecimen	EMEC345749	J. K. Liebherr	1	adult	pin	3/23/1980	United States	Nevada	Nye County	Beatty, 8.0 mi. S		1050		36.85263	-116.72664	WGS1984				Bembidion obtusangulum LeConte, 1863	Animalia	Arthropoda	Insecta	Coleoptera	Carabidae	Bembidion	obtusangulum		LeConte, 1863
urn:catalog:EMEC:EMEC:345750		https://creativecommons.org/publicdomain/zero/1.0/	http://vertnet.org/resources/norms.html	http://essigdb.berkeley.edu/cgi/eme_query?bnhm_id=EMEC345750&one=T	EMEC	EMEC	PreservedSpecimen	EMEC345750	J. K. Liebherr	1	adult	pin	3/23/1980	United States	Nevada	Nye County	Beatty, 8.0 mi. S		1050		36.85263	-116.72664	WGS1984				Bembidion obtusangulum LeConte, 1863	Animalia	Arthropoda	Insecta	Coleoptera	Carabidae	Bembidion	obtusangulum		LeConte, 1863
urn:catalog:EMEC:EMEC:345751		https://creativecommons.org/publicdomain/zero/1.0/	http://vertnet.org/resources/norms.html	http://essigdb.berkeley.edu/cgi/eme_query?bnhm_id=EMEC345751&one=T	EMEC	EMEC	PreservedSpecimen	EMEC345751	J. K. Liebherr	1	adult	pin	3/23/1980	United States	Nevada	Nye County	Beatty, 8.0 mi. S		1050		36.85263	-116.72664	WGS1984				Bembidion obtusangulum LeConte, 1863	Animalia	Arthropoda	Insecta	Coleoptera	Carabidae	Bembidion	obtusangulum		LeConte, 1863
urn:catalog:EMEC:EMEC:345752		https://creativecommons.org/publicdomain/zero/1.0/	http://vertnet.org/resources/norms.html	http://essigdb.berkeley.edu/cgi/eme_query?bnhm_id=EMEC345752&one=T	EMEC	EMEC	PreservedSpecimen	EMEC345752	J. K. Liebherr	1	adult	pin	3/23/1980	United States	Nevada	Nye County	Beatty, 8.0 mi. S		1050		36.85263	-116.72664	WGS1984				Bembidion obtusangulum LeConte, 1863	Animalia	Arthropoda	Insecta	Coleoptera	Carabidae	Bembidion	obtusangulum		LeConte, 1863
urn:catalog:EMEC:EMEC:1139239	4/5/2016	https://creativecommons.org/publicdomain/zero/1.0/	http://vertnet.org/resources/norms.html	http://essigdb.berkeley.edu/cgi/eme_query?bnhm_id=EMEC1139239&one=T	EMEC	EMEC	PreservedSpecimen	EMEC1139239	Richard W. Baumann	1	adult	pin	7/28/1998	United States	Nevada	Elko County	Sunflower Flat, Rd. 930, southeast of Mountain City		2012		41.79275	-115.75813	WGS1984	1000			Bembidion obtusangulum LeConte, 1863	Animalia	Arthropoda	Insecta	Coleoptera	Carabidae	Bembidion	obtusangulum		LeConte, 1863
urn:catalog:OSAC:OSAC:2003010		https://creativecommons.org/publicdomain/zero/1.0/	http://vertnet.org/resources/norms.html	http://essigdb.berkeley.edu/cgi/eme_query?bnhm_id=OSAC2003010&one=T	OSAC	OSAC	PreservedSpecimen	OSAC2003010	Kipling Will	1	adult	pin	6/14/2009	United States	Nevada	Elko County	Lamoille Creek, Ruby Mtns		2152		40.66269	-115.446	WGS1984				Bembidion quadrulum LeConte, 1861	Animalia	Arthropoda	Insecta	Coleoptera	Carabidae	Bembidion	quadrulum		LeConte, 1861
urn:catalog:OSAC:OSAC:2003322		https://creativecommons.org/publicdomain/zero/1.0/	http://vertnet.org/resources/norms.html	http://essigdb.berkeley.edu/cgi/eme_query?bnhm_id=OSAC2003322&one=T	OSAC	OSAC	PreservedSpecimen	OSAC2003322	Kipling Will	1	adult	pin	6/14/2009	United States	Nevada	Elko County	Lamoille Creek, Ruby Mtns		2152		40.66269	-115.446	WGS1984				Bembidion quadrulum LeConte, 1861	Animalia	Arthropoda	Insecta	Coleoptera	Carabidae	Bembidion	quadrulum		LeConte, 1861
urn:catalog:OSAC:OSAC:2003644		https://creativecommons.org/publicdomain/zero/1.0/	http://vertnet.org/resources/norms.html	http://essigdb.berkeley.edu/cgi/eme_query?bnhm_id=OSAC2003644&one=T	OSAC	OSAC	PreservedSpecimen	OSAC2003644	David R. Maddison, John Sproul	1	adult	pin	6/16/2013	United States	Nevada	Elko County	Lamoille Creek, Ruby Mtns		2296		40.6503	-115.4091	WGS1984				Bembidion quadrulum LeConte, 1861	Animalia	Arthropoda	Insecta	Coleoptera	Carabidae	Bembidion	quadrulum		LeConte, 1861
urn:catalog:EMEC:EMEC:345767		https://creativecommons.org/publicdomain/zero/1.0/	http://vertnet.org/resources/norms.html	http://essigdb.berkeley.edu/cgi/eme_query?bnhm_id=EMEC345767&one=T	EMEC	EMEC	PreservedSpecimen	EMEC345767	J. K. Liebherr	1	adult	pin	6/17/1980	United States	Nevada	Lincoln County	Kershaw-Ryan Rec. Area	4550\'	1383		37.58886	-114.52129	WGS1984				Bembidion striola (LeConte, 1852)	Animalia	Arthropoda	Insecta	Coleoptera	Carabidae	Bembidion	striola		(LeConte, 1852)
urn:catalog:EMEC:EMEC:345768		https://creativecommons.org/publicdomain/zero/1.0/	http://vertnet.org/resources/norms.html	http://essigdb.berkeley.edu/cgi/eme_query?bnhm_id=EMEC345768&one=T	EMEC	EMEC	PreservedSpecimen	EMEC345768	J. K. Liebherr	1	adult	pin	6/17/1980	United States	Nevada	Lincoln County	Kershaw-Ryan Rec. Area	4550\'	1383		37.58886	-114.52129	WGS1984				Bembidion striola (LeConte, 1852)	Animalia	Arthropoda	Insecta	Coleoptera	Carabidae	Bembidion	striola		(LeConte, 1852)
urn:catalog:EMEC:EMEC:345799	8/15/2016	https://creativecommons.org/publicdomain/zero/1.0/	http://vertnet.org/resources/norms.html	http://essigdb.berkeley.edu/cgi/eme_query?bnhm_id=EMEC345799&one=T	EMEC	EMEC	PreservedSpecimen	EMEC345799	J. K. Liebherr	1	adult	pin	6/15/1980	United States	Nevada	Nye County	Springdale, 1.0 mi. S	3400\'	1036		37.02993	-116.75695	WGS1984				Bembidion umbratum (LeConte, 1847)	Animalia	Arthropoda	Insecta	Coleoptera	Carabidae	Bembidion	umbratum		(LeConte, 1847)
urn:catalog:EMEC:EMEC:345800	8/15/2016	https://creativecommons.org/publicdomain/zero/1.0/	http://vertnet.org/resources/norms.html	http://essigdb.berkeley.edu/cgi/eme_query?bnhm_id=EMEC345800&one=T	EMEC	EMEC	PreservedSpecimen	EMEC345800	J. K. Liebherr	1	adult	pin	6/15/1980	United States	Nevada	Nye County	Springdale, 1.0 mi. S	3400\'	1036		37.02993	-116.75695	WGS1984				Bembidion umbratum (LeConte, 1847)	Animalia	Arthropoda	Insecta	Coleoptera	Carabidae	Bembidion	umbratum		(LeConte, 1847)
urn:catalog:EMEC:EMEC:345801	8/15/2016	https://creativecommons.org/publicdomain/zero/1.0/	http://vertnet.org/resources/norms.html	http://essigdb.berkeley.edu/cgi/eme_query?bnhm_id=EMEC345801&one=T	EMEC	EMEC	PreservedSpecimen	EMEC345801	J. K. Liebherr	1	adult	pin	6/15/1980	United States	Nevada	Nye County	Springdale, 1.0 mi. S	3400\'	1036		37.02993	-116.75695	WGS1984				Bembidion umbratum (LeConte, 1847)	Animalia	Arthropoda	Insecta	Coleoptera	Carabidae	Bembidion	umbratum		(LeConte, 1847)
urn:catalog:EMEC:EMEC:345802	8/15/2016	https://creativecommons.org/publicdomain/zero/1.0/	http://vertnet.org/resources/norms.html	http://essigdb.berkeley.edu/cgi/eme_query?bnhm_id=EMEC345802&one=T	EMEC	EMEC	PreservedSpecimen	EMEC345802	J. K. Liebherr	1	adult	pin	6/15/1980	United States	Nevada	Nye County	Springdale, 1.0 mi. S	3400\'	1036		37.02993	-116.75695	WGS1984				Bembidion umbratum (LeConte, 1847)	Animalia	Arthropoda	Insecta	Coleoptera	Carabidae	Bembidion	umbratum		(LeConte, 1847)
urn:catalog:EMEC:EMEC:345803	8/15/2016	https://creativecommons.org/publicdomain/zero/1.0/	http://vertnet.org/resources/norms.html	http://essigdb.berkeley.edu/cgi/eme_query?bnhm_id=EMEC345803&one=T	EMEC	EMEC	PreservedSpecimen	EMEC345803	J. K. Liebherr	1	adult	pin	6/15/1980	United States	Nevada	Nye County	Springdale, 1.0 mi. S	3400\'	1036		37.02993	-116.75695	WGS1984				Bembidion umbratum (LeConte, 1847)	Animalia	Arthropoda	Insecta	Coleoptera	Carabidae	Bembidion	umbratum		(LeConte, 1847)
urn:catalog:EMEC:EMEC:345804	8/15/2016	https://creativecommons.org/publicdomain/zero/1.0/	http://vertnet.org/resources/norms.html	http://essigdb.berkeley.edu/cgi/eme_query?bnhm_id=EMEC345804&one=T	EMEC	EMEC	PreservedSpecimen	EMEC345804	J. K. Liebherr	1	adult	pin	6/15/1980	United States	Nevada	Nye County	Springdale, 1.0 mi. S	3400\'	1036		37.02993	-116.75695	WGS1984				Bembidion umbratum (LeConte, 1847)	Animalia	Arthropoda	Insecta	Coleoptera	Carabidae	Bembidion	umbratum		(LeConte, 1847)
urn:catalog:EMEC:EMEC:345805	8/15/2016	https://creativecommons.org/publicdomain/zero/1.0/	http://vertnet.org/resources/norms.html	http://essigdb.berkeley.edu/cgi/eme_query?bnhm_id=EMEC345805&one=T	EMEC	EMEC	PreservedSpecimen	EMEC345805	J. K. Liebherr	1	adult	pin	6/15/1980	United States	Nevada	Nye County	Springdale, 1.0 mi. S	3400\'	1036		37.02993	-116.75695	WGS1984				Bembidion umbratum (LeConte, 1847)	Animalia	Arthropoda	Insecta	Coleoptera	Carabidae	Bembidion	umbratum		(LeConte, 1847)
urn:catalog:EMEC:EMEC:345806	8/15/2016	https://creativecommons.org/publicdomain/zero/1.0/	http://vertnet.org/resources/norms.html	http://essigdb.berkeley.edu/cgi/eme_query?bnhm_id=EMEC345806&one=T	EMEC	EMEC	PreservedSpecimen	EMEC345806	J. K. Liebherr	1	adult	pin	6/15/1980	United States	Nevada	Nye County	Springdale, 1.0 mi. S	3400\'	1036		37.02993	-116.75695	WGS1984				Bembidion umbratum (LeConte, 1847)	Animalia	Arthropoda	Insecta	Coleoptera	Carabidae	Bembidion	umbratum		(LeConte, 1847)
urn:catalog:EMEC:EMEC:345807	8/15/2016	https://creativecommons.org/publicdomain/zero/1.0/	http://vertnet.org/resources/norms.html	http://essigdb.berkeley.edu/cgi/eme_query?bnhm_id=EMEC345807&one=T	EMEC	EMEC	PreservedSpecimen	EMEC345807	J. K. Liebherr	1	adult	pin	6/15/1980	United States	Nevada	Nye County	Springdale, 1.0 mi. S	3400\'	1036		37.02993	-116.75695	WGS1984				Bembidion umbratum (LeConte, 1847)	Animalia	Arthropoda	Insecta	Coleoptera	Carabidae	Bembidion	umbratum		(LeConte, 1847)
urn:catalog:EMEC:EMEC:345793		https://creativecommons.org/publicdomain/zero/1.0/	http://vertnet.org/resources/norms.html	http://essigdb.berkeley.edu/cgi/eme_query?bnhm_id=EMEC345793&one=T	EMEC	EMEC	PreservedSpecimen	EMEC345793	J. K. Liebherr	1	adult	pin	6/10/1980	United States	Nevada	Lyon County	Carson R. at Weeks	4500\'	1372		39.29321	-119.25134	WGS1984				Bembidion umbratum (LeConte, 1847)	Animalia	Arthropoda	Insecta	Coleoptera	Carabidae	Bembidion	umbratum		(LeConte, 1847)
urn:catalog:EMEC:EMEC:345794		https://creativecommons.org/publicdomain/zero/1.0/	http://vertnet.org/resources/norms.html	http://essigdb.berkeley.edu/cgi/eme_query?bnhm_id=EMEC345794&one=T	EMEC	EMEC	PreservedSpecimen	EMEC345794	J. K. Liebherr	1	adult	pin	6/10/1980	United States	Nevada	Lyon County	Carson R. at Weeks	4500\'	1372		39.29321	-119.25134	WGS1984				Bembidion umbratum (LeConte, 1847)	Animalia	Arthropoda	Insecta	Coleoptera	Carabidae	Bembidion	umbratum		(LeConte, 1847)
urn:catalog:EMEC:EMEC:345795		https://creativecommons.org/publicdomain/zero/1.0/	http://vertnet.org/resources/norms.html	http://essigdb.berkeley.edu/cgi/eme_query?bnhm_id=EMEC345795&one=T	EMEC	EMEC	PreservedSpecimen	EMEC345795	J. K. Liebherr	1	adult	pin	6/10/1980	United States	Nevada	Lyon County	Carson R. at Weeks	4500\'	1372		39.29321	-119.25134	WGS1984				Bembidion umbratum (LeConte, 1847)	Animalia	Arthropoda	Insecta	Coleoptera	Carabidae	Bembidion	umbratum		(LeConte, 1847)
urn:catalog:EMEC:EMEC:345796		https://creativecommons.org/publicdomain/zero/1.0/	http://vertnet.org/resources/norms.html	http://essigdb.berkeley.edu/cgi/eme_query?bnhm_id=EMEC345796&one=T	EMEC	EMEC	PreservedSpecimen	EMEC345796	J. K. Liebherr	1	adult	pin	6/10/1980	United States	Nevada	Lyon County	Carson R. at Weeks	4500\'	1372		39.29321	-119.25134	WGS1984				Bembidion umbratum (LeConte, 1847)	Animalia	Arthropoda	Insecta	Coleoptera	Carabidae	Bembidion	umbratum		(LeConte, 1847)
urn:catalog:EMEC:EMEC:345797	8/15/2016	https://creativecommons.org/publicdomain/zero/1.0/	http://vertnet.org/resources/norms.html	http://essigdb.berkeley.edu/cgi/eme_query?bnhm_id=EMEC345797&one=T	EMEC	EMEC	PreservedSpecimen	EMEC345797	J. K. Liebherr	1	adult	pin	6/15/1980	United States	Nevada	Nye County	Springdale, 1.0 mi. S	3400\'	1036		37.02993	-116.75695	WGS1984				Bembidion umbratum (LeConte, 1847)	Animalia	Arthropoda	Insecta	Coleoptera	Carabidae	Bembidion	umbratum		(LeConte, 1847)
urn:catalog:EMEC:EMEC:345798	8/15/2016	https://creativecommons.org/publicdomain/zero/1.0/	http://vertnet.org/resources/norms.html	http://essigdb.berkeley.edu/cgi/eme_query?bnhm_id=EMEC345798&one=T	EMEC	EMEC	PreservedSpecimen	EMEC345798	J. K. Liebherr	1	adult	pin	6/15/1980	United States	Nevada	Nye County	Springdale, 1.0 mi. S	3400\'	1036		37.02993	-116.75695	WGS1984				Bembidion umbratum (LeConte, 1847)	Animalia	Arthropoda	Insecta	Coleoptera	Carabidae	Bembidion	umbratum		(LeConte, 1847)
urn:catalog:OSAC:OSAC:2001757		https://creativecommons.org/publicdomain/zero/1.0/	http://vertnet.org/resources/norms.html	http://essigdb.berkeley.edu/cgi/eme_query?bnhm_id=OSAC2001757&one=T	OSAC	OSAC	PreservedSpecimen	OSAC2001757	David R. Maddison, A. Elizabeth Arnold	1	adult	pin	5/24/2000	United States	Nevada	Lyon County	Carson River near Weeks		390		39.2866	-119.2778	WGS1984				Bembidion variolosum (Motschulsky, 1859)	Animalia	Arthropoda	Insecta	Coleoptera	Carabidae	Bembidion	variolosum		(Motschulsky, 1859)
urn:catalog:EMEC:EMEC:345808		https://creativecommons.org/publicdomain/zero/1.0/	http://vertnet.org/resources/norms.html	http://essigdb.berkeley.edu/cgi/eme_query?bnhm_id=EMEC345808&one=T	EMEC	EMEC	PreservedSpecimen	EMEC345808	J. K. Liebherr	1	adult	pin	6/10/1980	United States	Nevada	Washoe County	Washoe Lake N shore	5200\'	1585		39.27548	-119.79571	WGS1984				Bembidion versicolor (LeConte, 1847)	Animalia	Arthropoda	Insecta	Coleoptera	Carabidae	Bembidion	versicolor		(LeConte, 1847)
urn:catalog:EMEC:EMEC:345809		https://creativecommons.org/publicdomain/zero/1.0/	http://vertnet.org/resources/norms.html	http://essigdb.berkeley.edu/cgi/eme_query?bnhm_id=EMEC345809&one=T	EMEC	EMEC	PreservedSpecimen	EMEC345809	J. K. Liebherr	1	adult	pin	6/18/1980	United States	Nevada	Elko County	Deeth, 1.0 mi. E	5400\'	1646		41.06547	-115.27478	WGS1984				Bembidion versicolor (LeConte, 1847)	Animalia	Arthropoda	Insecta	Coleoptera	Carabidae	Bembidion	versicolor		(LeConte, 1847)
urn:catalog:EMEC:EMEC:345810		https://creativecommons.org/publicdomain/zero/1.0/	http://vertnet.org/resources/norms.html	http://essigdb.berkeley.edu/cgi/eme_query?bnhm_id=EMEC345810&one=T	EMEC	EMEC	PreservedSpecimen	EMEC345810	J. K. Liebherr	1	adult	pin	6/10/1980	United States	Nevada	Washoe County	Washoe Lake N shore	5200\'	1585		39.27548	-119.79571	WGS1984				Bembidion versicolor (LeConte, 1847)	Animalia	Arthropoda	Insecta	Coleoptera	Carabidae	Bembidion	versicolor		(LeConte, 1847)
urn:catalog:EMEC:EMEC:345811		https://creativecommons.org/publicdomain/zero/1.0/	http://vertnet.org/resources/norms.html	http://essigdb.berkeley.edu/cgi/eme_query?bnhm_id=EMEC345811&one=T	EMEC	EMEC	PreservedSpecimen	EMEC345811	J. K. Liebherr	1	adult	pin	6/18/1980	United States	Nevada	Elko County	Deeth, 1.0 mi. E	5400\'	1646		41.06547	-115.27478	WGS1984				Bembidion versicolor (LeConte, 1847)	Animalia	Arthropoda	Insecta	Coleoptera	Carabidae	Bembidion	versicolor		(LeConte, 1847)
urn:catalog:EMEC:EMEC:345812		https://creativecommons.org/publicdomain/zero/1.0/	http://vertnet.org/resources/norms.html	http://essigdb.berkeley.edu/cgi/eme_query?bnhm_id=EMEC345812&one=T	EMEC	EMEC	PreservedSpecimen	EMEC345812	J. K. Liebherr	1	adult	pin	6/18/1980	United States	Nevada	Elko County	Ruby Valley @ Franklin R.	6200\'	1890		40.36001	-115.44789	WGS1984				Bembidion versicolor (LeConte, 1847)	Animalia	Arthropoda	Insecta	Coleoptera	Carabidae	Bembidion	versicolor		(LeConte, 1847)
urn:catalog:EMEC:EMEC:345813		https://creativecommons.org/publicdomain/zero/1.0/	http://vertnet.org/resources/norms.html	http://essigdb.berkeley.edu/cgi/eme_query?bnhm_id=EMEC345813&one=T	EMEC	EMEC	PreservedSpecimen	EMEC345813	J. K. Liebherr	1	adult	pin	6/18/1980	United States	Nevada	Elko County	Ruby Valley @ Franklin R.	6200\'	1890		40.36001	-115.44789	WGS1984				Bembidion versicolor (LeConte, 1847)	Animalia	Arthropoda	Insecta	Coleoptera	Carabidae	Bembidion	versicolor		(LeConte, 1847)
urn:catalog:EMEC:EMEC:345814		https://creativecommons.org/publicdomain/zero/1.0/	http://vertnet.org/resources/norms.html	http://essigdb.berkeley.edu/cgi/eme_query?bnhm_id=EMEC345814&one=T	EMEC	EMEC	PreservedSpecimen	EMEC345814	J. K. Liebherr	1	adult	pin	6/18/1980	United States	Nevada	Elko County	Ruby Valley @ Franklin R.	6200\'	1890		40.36001	-115.44789	WGS1984				Bembidion versicolor (LeConte, 1847)	Animalia	Arthropoda	Insecta	Coleoptera	Carabidae	Bembidion	versicolor		(LeConte, 1847)
urn:catalog:EMEC:EMEC:345815		https://creativecommons.org/publicdomain/zero/1.0/	http://vertnet.org/resources/norms.html	http://essigdb.berkeley.edu/cgi/eme_query?bnhm_id=EMEC345815&one=T	EMEC	EMEC	PreservedSpecimen	EMEC345815	J. K. Liebherr	1	adult	pin	6/18/1980	United States	Nevada	Elko County	Ruby Valley @ Franklin R.	6200\'	1890		40.36001	-115.44789	WGS1984				Bembidion versicolor (LeConte, 1847)	Animalia	Arthropoda	Insecta	Coleoptera	Carabidae	Bembidion	versicolor		(LeConte, 1847)
urn:catalog:EMEC:EMEC:345816		https://creativecommons.org/publicdomain/zero/1.0/	http://vertnet.org/resources/norms.html	http://essigdb.berkeley.edu/cgi/eme_query?bnhm_id=EMEC345816&one=T	EMEC	EMEC	PreservedSpecimen	EMEC345816	J. K. Liebherr	1	adult	pin	6/18/1980	United States	Nevada	Elko County	Ruby Valley @ Franklin R.	6200\'	1890		40.36001	-115.44789	WGS1984				Bembidion versicolor (LeConte, 1847)	Animalia	Arthropoda	Insecta	Coleoptera	Carabidae	Bembidion	versicolor		(LeConte, 1847)
urn:catalog:EMEC:EMEC:345817		https://creativecommons.org/publicdomain/zero/1.0/	http://vertnet.org/resources/norms.html	http://essigdb.berkeley.edu/cgi/eme_query?bnhm_id=EMEC345817&one=T	EMEC	EMEC	PreservedSpecimen	EMEC345817	J. K. Liebherr	1	adult	pin	6/18/1980	United States	Nevada	Elko County	Ruby Valley @ Franklin R.	6200\'	1890		40.36001	-115.44789	WGS1984				Bembidion versicolor (LeConte, 1847)	Animalia	Arthropoda	Insecta	Coleoptera	Carabidae	Bembidion	versicolor		(LeConte, 1847)
urn:catalog:EMEC:EMEC:345818		https://creativecommons.org/publicdomain/zero/1.0/	http://vertnet.org/resources/norms.html	http://essigdb.berkeley.edu/cgi/eme_query?bnhm_id=EMEC345818&one=T	EMEC	EMEC	PreservedSpecimen	EMEC345818	J. K. Liebherr	1	adult	pin	6/18/1980	United States	Nevada	Elko County	Ruby Valley @ Franklin R.	6200\'	1890		40.36001	-115.44789	WGS1984				Bembidion versicolor (LeConte, 1847)	Animalia	Arthropoda	Insecta	Coleoptera	Carabidae	Bembidion	versicolor		(LeConte, 1847)
urn:catalog:EMEC:EMEC:345819		https://creativecommons.org/publicdomain/zero/1.0/	http://vertnet.org/resources/norms.html	http://essigdb.berkeley.edu/cgi/eme_query?bnhm_id=EMEC345819&one=T	EMEC	EMEC	PreservedSpecimen	EMEC345819	J. K. Liebherr	1	adult	pin	6/18/1980	United States	Nevada	Elko County	Ruby Valley @ Franklin R.	6200\'	1890		40.36001	-115.44789	WGS1984				Bembidion versicolor (LeConte, 1847)	Animalia	Arthropoda	Insecta	Coleoptera	Carabidae	Bembidion	versicolor		(LeConte, 1847)
urn:catalog:EMEC:EMEC:345820		https://creativecommons.org/publicdomain/zero/1.0/	http://vertnet.org/resources/norms.html	http://essigdb.berkeley.edu/cgi/eme_query?bnhm_id=EMEC345820&one=T	EMEC	EMEC	PreservedSpecimen	EMEC345820	J. K. Liebherr	1	adult	pin	6/18/1980	United States	Nevada	Elko County	Ruby Valley @ Franklin R.	6200\'	1890		40.36001	-115.44789	WGS1984				Bembidion versicolor (LeConte, 1847)	Animalia	Arthropoda	Insecta	Coleoptera	Carabidae	Bembidion	versicolor		(LeConte, 1847)
urn:catalog:EMEC:EMEC:345821		https://creativecommons.org/publicdomain/zero/1.0/	http://vertnet.org/resources/norms.html	http://essigdb.berkeley.edu/cgi/eme_query?bnhm_id=EMEC345821&one=T	EMEC	EMEC	PreservedSpecimen	EMEC345821	J. K. Liebherr	1	adult	pin	6/18/1980	United States	Nevada	Elko County	Ruby Valley @ Franklin R.	6200\'	1890		40.36001	-115.44789	WGS1984				Bembidion versicolor (LeConte, 1847)	Animalia	Arthropoda	Insecta	Coleoptera	Carabidae	Bembidion	versicolor		(LeConte, 1847)
urn:catalog:EMEC:EMEC:345822		https://creativecommons.org/publicdomain/zero/1.0/	http://vertnet.org/resources/norms.html	http://essigdb.berkeley.edu/cgi/eme_query?bnhm_id=EMEC345822&one=T	EMEC	EMEC	PreservedSpecimen	EMEC345822	J. K. Liebherr	1	adult	pin	6/18/1980	United States	Nevada	Elko County	Ruby Valley @ Franklin R.	6200\'	1890		40.36001	-115.44789	WGS1984				Bembidion versicolor (LeConte, 1847)	Animalia	Arthropoda	Insecta	Coleoptera	Carabidae	Bembidion	versicolor		(LeConte, 1847)
urn:catalog:EMEC:EMEC:345823		https://creativecommons.org/publicdomain/zero/1.0/	http://vertnet.org/resources/norms.html	http://essigdb.berkeley.edu/cgi/eme_query?bnhm_id=EMEC345823&one=T	EMEC	EMEC	PreservedSpecimen	EMEC345823	J. K. Liebherr	1	adult	pin	6/18/1980	United States	Nevada	Elko County	Ruby Valley @ Franklin R.	6200\'	1890		40.36001	-115.44789	WGS1984				Bembidion versicolor (LeConte, 1847)	Animalia	Arthropoda	Insecta	Coleoptera	Carabidae	Bembidion	versicolor		(LeConte, 1847)
urn:catalog:EMEC:EMEC:345824		https://creativecommons.org/publicdomain/zero/1.0/	http://vertnet.org/resources/norms.html	http://essigdb.berkeley.edu/cgi/eme_query?bnhm_id=EMEC345824&one=T	EMEC	EMEC	PreservedSpecimen	EMEC345824	J. K. Liebherr	1	adult	pin	6/18/1980	United States	Nevada	Elko County	Ruby Valley @ Franklin R.	6200\'	1890		40.36001	-115.44789	WGS1984				Bembidion versicolor (LeConte, 1847)	Animalia	Arthropoda	Insecta	Coleoptera	Carabidae	Bembidion	versicolor		(LeConte, 1847)
urn:catalog:EMEC:EMEC:345825		https://creativecommons.org/publicdomain/zero/1.0/	http://vertnet.org/resources/norms.html	http://essigdb.berkeley.edu/cgi/eme_query?bnhm_id=EMEC345825&one=T	EMEC	EMEC	PreservedSpecimen	EMEC345825	J. K. Liebherr	1	adult	pin	6/18/1980	United States	Nevada	Elko County	Ruby Valley @ Franklin R.	6200\'	1890		40.36001	-115.44789	WGS1984				Bembidion versicolor (LeConte, 1847)	Animalia	Arthropoda	Insecta	Coleoptera	Carabidae	Bembidion	versicolor		(LeConte, 1847)
urn:catalog:EMEC:EMEC:345826		https://creativecommons.org/publicdomain/zero/1.0/	http://vertnet.org/resources/norms.html	http://essigdb.berkeley.edu/cgi/eme_query?bnhm_id=EMEC345826&one=T	EMEC	EMEC	PreservedSpecimen	EMEC345826	J. K. Liebherr	1	adult	pin	6/18/1980	United States	Nevada	Elko County	Ruby Valley @ Franklin R.	6200\'	1890		40.36001	-115.44789	WGS1984				Bembidion versicolor (LeConte, 1847)	Animalia	Arthropoda	Insecta	Coleoptera	Carabidae	Bembidion	versicolor		(LeConte, 1847)
urn:catalog:EMEC:EMEC:345827		https://creativecommons.org/publicdomain/zero/1.0/	http://vertnet.org/resources/norms.html	http://essigdb.berkeley.edu/cgi/eme_query?bnhm_id=EMEC345827&one=T	EMEC	EMEC	PreservedSpecimen	EMEC345827	J. K. Liebherr	1	adult	pin	6/18/1980	United States	Nevada	Elko County	Ruby Valley @ Franklin R.	6200\'	1890		40.36001	-115.44789	WGS1984				Bembidion versicolor (LeConte, 1847)	Animalia	Arthropoda	Insecta	Coleoptera	Carabidae	Bembidion	versicolor		(LeConte, 1847)
urn:catalog:EMEC:EMEC:345828		https://creativecommons.org/publicdomain/zero/1.0/	http://vertnet.org/resources/norms.html	http://essigdb.berkeley.edu/cgi/eme_query?bnhm_id=EMEC345828&one=T	EMEC	EMEC	PreservedSpecimen	EMEC345828	J. K. Liebherr	1	adult	pin	6/18/1980	United States	Nevada	Elko County	Ruby Valley @ Franklin R.	6200\'	1890		40.36001	-115.44789	WGS1984				Bembidion versicolor (LeConte, 1847)	Animalia	Arthropoda	Insecta	Coleoptera	Carabidae	Bembidion	versicolor		(LeConte, 1847)
urn:catalog:EMEC:EMEC:345829		https://creativecommons.org/publicdomain/zero/1.0/	http://vertnet.org/resources/norms.html	http://essigdb.berkeley.edu/cgi/eme_query?bnhm_id=EMEC345829&one=T	EMEC	EMEC	PreservedSpecimen	EMEC345829	J. K. Liebherr	1	adult	pin	6/18/1980	United States	Nevada	Elko County	Ruby Valley @ Franklin R.	6200\'	1890		40.36001	-115.44789	WGS1984				Bembidion versicolor (LeConte, 1847)	Animalia	Arthropoda	Insecta	Coleoptera	Carabidae	Bembidion	versicolor		(LeConte, 1847)
urn:catalog:EMEC:EMEC:345830		https://creativecommons.org/publicdomain/zero/1.0/	http://vertnet.org/resources/norms.html	http://essigdb.berkeley.edu/cgi/eme_query?bnhm_id=EMEC345830&one=T	EMEC	EMEC	PreservedSpecimen	EMEC345830	J. K. Liebherr	1	adult	pin	6/18/1980	United States	Nevada	Elko County	Ruby Valley @ Franklin R.	6200\'	1890		40.36001	-115.44789	WGS1984				Bembidion versicolor (LeConte, 1847)	Animalia	Arthropoda	Insecta	Coleoptera	Carabidae	Bembidion	versicolor		(LeConte, 1847)
urn:catalog:EMEC:EMEC:345831		https://creativecommons.org/publicdomain/zero/1.0/	http://vertnet.org/resources/norms.html	http://essigdb.berkeley.edu/cgi/eme_query?bnhm_id=EMEC345831&one=T	EMEC	EMEC	PreservedSpecimen	EMEC345831	J. K. Liebherr	1	adult	pin	6/18/1980	United States	Nevada	Elko County	Ruby Valley @ Franklin R.	6200\'	1890		40.36001	-115.44789	WGS1984				Bembidion versicolor (LeConte, 1847)	Animalia	Arthropoda	Insecta	Coleoptera	Carabidae	Bembidion	versicolor		(LeConte, 1847)
urn:catalog:EMEC:EMEC:208840	4/4/2016	https://creativecommons.org/publicdomain/zero/1.0/	http://vertnet.org/resources/norms.html	http://essigdb.berkeley.edu/cgi/eme_query?bnhm_id=EMEC208840&one=T	EMEC	EMEC	PreservedSpecimen	EMEC208840		1	adult	pin	2001-06-24/2001-06-25	United States	Nevada	Elko County	Ruby Lake				40.19406	-115.46635	WGS1984	2275			Brachinus elongatulus Chaudoir, 1876	Animalia	Arthropoda	Insecta	Coleoptera	Carabidae	Brachinus	elongatulus		Chaudoir, 1876
urn:catalog:EMEC:EMEC:208841	4/4/2016	https://creativecommons.org/publicdomain/zero/1.0/	http://vertnet.org/resources/norms.html	http://essigdb.berkeley.edu/cgi/eme_query?bnhm_id=EMEC208841&one=T	EMEC	EMEC	PreservedSpecimen	EMEC208841		1	adult	pin	2001-06-24/2001-06-25	United States	Nevada	Elko County	Ruby Lake				40.19406	-115.46635	WGS1984	2275			Brachinus elongatulus Chaudoir, 1876	Animalia	Arthropoda	Insecta	Coleoptera	Carabidae	Brachinus	elongatulus		Chaudoir, 1876
urn:catalog:EMEC:EMEC:208842	4/4/2016	https://creativecommons.org/publicdomain/zero/1.0/	http://vertnet.org/resources/norms.html	http://essigdb.berkeley.edu/cgi/eme_query?bnhm_id=EMEC208842&one=T	EMEC	EMEC	PreservedSpecimen	EMEC208842		1	adult	pin	2001-06-24/2001-06-25	United States	Nevada	Elko County	Ruby Lake				40.19406	-115.46635	WGS1984	2275			Brachinus elongatulus Chaudoir, 1876	Animalia	Arthropoda	Insecta	Coleoptera	Carabidae	Brachinus	elongatulus		Chaudoir, 1876
urn:catalog:EMEC:EMEC:208843	4/4/2016	https://creativecommons.org/publicdomain/zero/1.0/	http://vertnet.org/resources/norms.html	http://essigdb.berkeley.edu/cgi/eme_query?bnhm_id=EMEC208843&one=T	EMEC	EMEC	PreservedSpecimen	EMEC208843		1	adult	pin	2001-06-24/2001-06-25	United States	Nevada	Elko County	Ruby Lake				40.19406	-115.46635	WGS1984	2275			Brachinus elongatulus Chaudoir, 1876	Animalia	Arthropoda	Insecta	Coleoptera	Carabidae	Brachinus	elongatulus		Chaudoir, 1876
urn:catalog:EMEC:EMEC:208844	4/4/2016	https://creativecommons.org/publicdomain/zero/1.0/	http://vertnet.org/resources/norms.html	http://essigdb.berkeley.edu/cgi/eme_query?bnhm_id=EMEC208844&one=T	EMEC	EMEC	PreservedSpecimen	EMEC208844		1	adult	pin	2001-06-24/2001-06-25	United States	Nevada	Elko County	Ruby Lake				40.19406	-115.46635	WGS1984	2275			Brachinus elongatulus Chaudoir, 1876	Animalia	Arthropoda	Insecta	Coleoptera	Carabidae	Brachinus	elongatulus		Chaudoir, 1876
urn:catalog:EMEC:EMEC:208845	4/4/2016	https://creativecommons.org/publicdomain/zero/1.0/	http://vertnet.org/resources/norms.html	http://essigdb.berkeley.edu/cgi/eme_query?bnhm_id=EMEC208845&one=T	EMEC	EMEC	PreservedSpecimen	EMEC208845		1	adult	pin	2001-06-24/2001-06-25	United States	Nevada	Elko County	Ruby Lake				40.19406	-115.46635	WGS1984	2275			Brachinus elongatulus Chaudoir, 1876	Animalia	Arthropoda	Insecta	Coleoptera	Carabidae	Brachinus	elongatulus		Chaudoir, 1876
urn:catalog:EMEC:EMEC:214683	4/4/2016	https://creativecommons.org/publicdomain/zero/1.0/	http://vertnet.org/resources/norms.html	http://essigdb.berkeley.edu/cgi/eme_query?bnhm_id=EMEC214683&one=T	EMEC	EMEC	PreservedSpecimen	EMEC214683		1	adult	pin	2001-06-24/2001-06-25	United States	Nevada	Elko County	Ruby Lake				40.19406	-115.46635	WGS1984	2275			Brachinus elongatulus Chaudoir, 1876	Animalia	Arthropoda	Insecta	Coleoptera	Carabidae	Brachinus	elongatulus		Chaudoir, 1876
urn:catalog:EMEC:EMEC:214684	4/4/2016	https://creativecommons.org/publicdomain/zero/1.0/	http://vertnet.org/resources/norms.html	http://essigdb.berkeley.edu/cgi/eme_query?bnhm_id=EMEC214684&one=T	EMEC	EMEC	PreservedSpecimen	EMEC214684		1	adult	pin	2001-06-24/2001-06-25	United States	Nevada	Elko County	Ruby Lake				40.19406	-115.46635	WGS1984	2275			Brachinus elongatulus Chaudoir, 1876	Animalia	Arthropoda	Insecta	Coleoptera	Carabidae	Brachinus	elongatulus		Chaudoir, 1876
urn:catalog:EMEC:EMEC:214685	4/4/2016	https://creativecommons.org/publicdomain/zero/1.0/	http://vertnet.org/resources/norms.html	http://essigdb.berkeley.edu/cgi/eme_query?bnhm_id=EMEC214685&one=T	EMEC	EMEC	PreservedSpecimen	EMEC214685		1	adult	pin	2001-06-24/2001-06-25	United States	Nevada	Elko County	Ruby Lake				40.19406	-115.46635	WGS1984	2275			Brachinus elongatulus Chaudoir, 1876	Animalia	Arthropoda	Insecta	Coleoptera	Carabidae	Brachinus	elongatulus		Chaudoir, 1876
urn:catalog:EMEC:EMEC:1137667	4/5/2016	https://creativecommons.org/publicdomain/zero/1.0/	http://vertnet.org/resources/norms.html	http://essigdb.berkeley.edu/cgi/eme_query?bnhm_id=EMEC1137667&one=T	EMEC	EMEC	PreservedSpecimen	EMEC1137667	R. L. Aalbu	1	adult	pin	2011-06-24/2011-06-25	United States	Nevada	Elko County	Ruby Mountains, Ruby Lake				40.19406	-115.46635	WGS1984	2275			Brachinus elongatulus Chaudoir, 1876	Animalia	Arthropoda	Insecta	Coleoptera	Carabidae	Brachinus	elongatulus		Chaudoir, 1876
urn:catalog:EMEC:EMEC:1137668	4/5/2016	https://creativecommons.org/publicdomain/zero/1.0/	http://vertnet.org/resources/norms.html	http://essigdb.berkeley.edu/cgi/eme_query?bnhm_id=EMEC1137668&one=T	EMEC	EMEC	PreservedSpecimen	EMEC1137668	R. L. Aalbu	1	adult	pin	2011-06-24/2011-06-25	United States	Nevada	Elko County	Ruby Mountains, Ruby Lake				40.19406	-115.46635	WGS1984	2275			Brachinus elongatulus Chaudoir, 1876	Animalia	Arthropoda	Insecta	Coleoptera	Carabidae	Brachinus	elongatulus		Chaudoir, 1876
urn:catalog:EMEC:EMEC:1137669	4/5/2016	https://creativecommons.org/publicdomain/zero/1.0/	http://vertnet.org/resources/norms.html	http://essigdb.berkeley.edu/cgi/eme_query?bnhm_id=EMEC1137669&one=T	EMEC	EMEC	PreservedSpecimen	EMEC1137669	R. L. Aalbu	1	adult	pin	2011-06-24/2011-06-25	United States	Nevada	Elko County	Ruby Mountains, Ruby Lake				40.19406	-115.46635	WGS1984	2275			Brachinus elongatulus Chaudoir, 1876	Animalia	Arthropoda	Insecta	Coleoptera	Carabidae	Brachinus	elongatulus		Chaudoir, 1876
urn:catalog:EMEC:EMEC:1137670	4/5/2016	https://creativecommons.org/publicdomain/zero/1.0/	http://vertnet.org/resources/norms.html	http://essigdb.berkeley.edu/cgi/eme_query?bnhm_id=EMEC1137670&one=T	EMEC	EMEC	PreservedSpecimen	EMEC1137670	R. L. Aalbu	1	adult	pin	2011-06-24/2011-06-25	United States	Nevada	Elko County	Ruby Mountains, Ruby Lake				40.19406	-115.46635	WGS1984	2275			Brachinus elongatulus Chaudoir, 1876	Animalia	Arthropoda	Insecta	Coleoptera	Carabidae	Brachinus	elongatulus		Chaudoir, 1876
urn:catalog:EMEC:EMEC:1137671	4/5/2016	https://creativecommons.org/publicdomain/zero/1.0/	http://vertnet.org/resources/norms.html	http://essigdb.berkeley.edu/cgi/eme_query?bnhm_id=EMEC1137671&one=T	EMEC	EMEC	PreservedSpecimen	EMEC1137671	R. L. Aalbu	1	adult	pin	2011-06-24/2011-06-25	United States	Nevada	Elko County	Ruby Mountains, Ruby Lake				40.19406	-115.46635	WGS1984	2275			Brachinus elongatulus Chaudoir, 1876	Animalia	Arthropoda	Insecta	Coleoptera	Carabidae	Brachinus	elongatulus		Chaudoir, 1876
urn:catalog:EMEC:EMEC:208846	12/20/2016	https://creativecommons.org/publicdomain/zero/1.0/	http://vertnet.org/resources/norms.html	http://essigdb.berkeley.edu/cgi/eme_query?bnhm_id=EMEC208846&one=T	EMEC	EMEC	PreservedSpecimen	EMEC208846	D. L. Wagner	1	adult	pin	2001-06-24/2001-06-25	United States	Nevada	Elko County	Ruby Lake				40.19406	-115.46635	WGS1984	2275			Brachinus elongatulus Chaudoir, 1876	Animalia	Arthropoda	Insecta	Coleoptera	Carabidae	Brachinus	elongatulus		Chaudoir, 1876
urn:catalog:EMEC:EMEC:214682	4/5/2016	https://creativecommons.org/publicdomain/zero/1.0/	http://vertnet.org/resources/norms.html	http://essigdb.berkeley.edu/cgi/eme_query?bnhm_id=EMEC214682&one=T	EMEC	EMEC	PreservedSpecimen	EMEC214682	J. K. Liebherr	1	adult	pin	6/18/1980	United States	Nevada	Elko County	Humboldt River at Halleck	5400\'	1645.92		40.95076	-115.45284	WGS1984	2000			Brachinus quadripennis Dejean, 1825	Animalia	Arthropoda	Insecta	Coleoptera	Carabidae	Brachinus	quadripennis		Dejean, 1825
urn:catalog:EMEC:EMEC:1139208	4/5/2016	https://creativecommons.org/publicdomain/zero/1.0/	http://vertnet.org/resources/norms.html	http://essigdb.berkeley.edu/cgi/eme_query?bnhm_id=EMEC1139208&one=T	EMEC	EMEC	PreservedSpecimen	EMEC1139208	S.M. Clark	1	adult	pin	7/13/2005	United States	Nevada	Pershing County	Humboldt River, above Rye Patch Reservoir	4140ft.	1261.872		40.7	-118.21667	unknown				Brachinus quadripennis Dejean, 1825	Animalia	Arthropoda	Insecta	Coleoptera	Carabidae	Brachinus	quadripennis		Dejean, 1825
urn:catalog:EMEC:EMEC:1139209	4/5/2016	https://creativecommons.org/publicdomain/zero/1.0/	http://vertnet.org/resources/norms.html	http://essigdb.berkeley.edu/cgi/eme_query?bnhm_id=EMEC1139209&one=T	EMEC	EMEC	PreservedSpecimen	EMEC1139209	S.M. Clark	1	adult	pin	7/13/2005	United States	Nevada	Pershing County	Humboldt River, above Rye Patch Reservoir	4140ft.	1261.872		40.7	-118.21667	unknown				Brachinus quadripennis Dejean, 1825	Animalia	Arthropoda	Insecta	Coleoptera	Carabidae	Brachinus	quadripennis		Dejean, 1825
urn:catalog:EMEC:EMEC:214681	4/5/2016	https://creativecommons.org/publicdomain/zero/1.0/	http://vertnet.org/resources/norms.html	http://essigdb.berkeley.edu/cgi/eme_query?bnhm_id=EMEC214681&one=T	EMEC	EMEC	PreservedSpecimen	EMEC214681	J. K. Liebherr	1	adult	pin	6/18/1980	United States	Nevada	Elko County	Humboldt River at Halleck	5400\'	1645.92		40.95076	-115.45284	WGS1984	2000			Brachinus quadripennis Dejean, 1825	Animalia	Arthropoda	Insecta	Coleoptera	Carabidae	Brachinus	quadripennis		Dejean, 1825
urn:catalog:EMEC:EMEC:1075367		https://creativecommons.org/publicdomain/zero/1.0/	http://vertnet.org/resources/norms.html	http://essigdb.berkeley.edu/cgi/eme_query?bnhm_id=EMEC1075367&one=T	EMEC	EMEC	PreservedSpecimen	EMEC1075367	Kipling Will, Frank Hsu, Riva Madan	1			6/13/2015	United States	Nevada	White Pine County	Great Basin Nat. Pk., Dead Lake		2904		38.93556	-114.27417	WGS1984	10			Bradycellus congener (LeConte, 1847)	Animalia	Arthropoda	Insecta	Coleoptera	Carabidae	Bradycellus	congener		(LeConte, 1847)
urn:catalog:EMEC:EMEC:1139264	12/20/2016	https://creativecommons.org/publicdomain/zero/1.0/	http://vertnet.org/resources/norms.html	http://essigdb.berkeley.edu/cgi/eme_query?bnhm_id=EMEC1139264&one=T	EMEC	EMEC	PreservedSpecimen	EMEC1139264		1	adult	pin	8/10/1961	United States	Nevada	Nye County	Nevada Test Site, Mercury				36.61704	-116.01691	WGS1984	5000			Bradycellus nitidus (Dejean, 1829)	Animalia	Arthropoda	Insecta	Coleoptera	Carabidae	Bradycellus	nitidus		(Dejean, 1829)
urn:catalog:CAS:ENT:8302832	4/5/2016	https://creativecommons.org/publicdomain/zero/1.0/	http://vertnet.org/resources/norms.html	http://essigdb.berkeley.edu/cgi/eme_query?bnhm_id=CASENT8302832&one=T	CAS	ENT	PreservedSpecimen	CASENT8302832	W.L. Pratt	1	adult	pin	6/9/1994	United States	Nevada	Clark County	Whitney Top, 5189 Sheppard Cir.	525m.	525		36.10533	-115.05991	WGS1984	100			Bradycellus rivalis (Say, 1823)	Animalia	Arthropoda	Insecta	Coleoptera	Carabidae	Bradycellus	rivalis		(Say, 1823)
urn:catalog:EMEC:EMEC:1139266		https://creativecommons.org/publicdomain/zero/1.0/	http://vertnet.org/resources/norms.html	http://essigdb.berkeley.edu/cgi/eme_query?bnhm_id=EMEC1139266&one=T	EMEC	EMEC	PreservedSpecimen	EMEC1139266	S.M. Clark	1	adult	pin	9/20/2005	United States	Nevada	Clark County	Newberry Mountains, Grapevine Canyon	2360 ft.	719.328		35.23333	-114.68333	unknown				Bradycellus rivalis (Say, 1823)	Animalia	Arthropoda	Insecta	Coleoptera	Carabidae	Bradycellus	rivalis		(Say, 1823)
urn:catalog:EMEC:EMEC:1139267		https://creativecommons.org/publicdomain/zero/1.0/	http://vertnet.org/resources/norms.html	http://essigdb.berkeley.edu/cgi/eme_query?bnhm_id=EMEC1139267&one=T	EMEC	EMEC	PreservedSpecimen	EMEC1139267	S.M. Clark	1	adult	pin	9/20/2005	United States	Nevada	Clark County	Newberry Mountains, Grapevine Canyon	2360 ft.	719.328		35.23333	-114.68333	unknown				Bradycellus rivalis (Say, 1823)	Animalia	Arthropoda	Insecta	Coleoptera	Carabidae	Bradycellus	rivalis		(Say, 1823)
urn:catalog:EMEC:EMEC:1139268		https://creativecommons.org/publicdomain/zero/1.0/	http://vertnet.org/resources/norms.html	http://essigdb.berkeley.edu/cgi/eme_query?bnhm_id=EMEC1139268&one=T	EMEC	EMEC	PreservedSpecimen	EMEC1139268	S.M. Clark	1	adult	pin	9/20/2005	United States	Nevada	Clark County	Newberry Mountains, Grapevine Canyon	2360 ft.	719.328		35.23333	-114.68333	unknown				Bradycellus rivalis (Say, 1823)	Animalia	Arthropoda	Insecta	Coleoptera	Carabidae	Bradycellus	rivalis		(Say, 1823)
urn:catalog:EMEC:EMEC:1139265	12/20/2016	https://creativecommons.org/publicdomain/zero/1.0/	http://vertnet.org/resources/norms.html	http://essigdb.berkeley.edu/cgi/eme_query?bnhm_id=EMEC1139265&one=T	EMEC	EMEC	PreservedSpecimen	EMEC1139265		1	adult	pin	1964-01-01/1964-12-31	United States	Nevada	Nye County	Nevada Test Site, Mercury				36.61704	-116.01691	WGS1984	5000			Bradycellus rivalis (Say, 1823)	Animalia	Arthropoda	Insecta	Coleoptera	Carabidae	Bradycellus	rivalis		(Say, 1823)
urn:catalog:EMEC:EMEC:344705	2/14/2016	https://creativecommons.org/publicdomain/zero/1.0/	http://vertnet.org/resources/norms.html	http://essigdb.berkeley.edu/cgi/eme_query?bnhm_id=EMEC344705&one=T	EMEC	EMEC	PreservedSpecimen	EMEC344705	Kipling Will, Frank Hsu, Riva Madan	1	adult	pin	2015-06-11/2015-06-13	United States	Nevada	White Pine County	Great Basin National Park, Blue Canyon		2433		39.05361	-114.3025	WGS1984	10			Calathus advena Leconte, 1848	Animalia	Arthropoda	Insecta	Coleoptera	Carabidae	Calathus	advena		Leconte, 1848
urn:catalog:EMEC:EMEC:344706	2/14/2016	https://creativecommons.org/publicdomain/zero/1.0/	http://vertnet.org/resources/norms.html	http://essigdb.berkeley.edu/cgi/eme_query?bnhm_id=EMEC344706&one=T	EMEC	EMEC	PreservedSpecimen	EMEC344706	Kipling Will, Frank Hsu, Riva Madan	1	adult	pin	6/13/2015	United States	Nevada	White Pine County	Great Basin National Park, Wheeler Peak Trailhead		3036		39.00944	-114.30722	WGS1984	10			Calathus advena Leconte, 1848	Animalia	Arthropoda	Insecta	Coleoptera	Carabidae	Calathus	advena		Leconte, 1848
urn:catalog:EMEC:EMEC:344707	2/14/2016	https://creativecommons.org/publicdomain/zero/1.0/	http://vertnet.org/resources/norms.html	http://essigdb.berkeley.edu/cgi/eme_query?bnhm_id=EMEC344707&one=T	EMEC	EMEC	PreservedSpecimen	EMEC344707	Kipling Will, Frank Hsu, Riva Madan	1	adult	pin	6/13/2015	United States	Nevada	White Pine County	Great Basin National Park, Wheeler Peak Trailhead		3036		39.00944	-114.30722	WGS1984	10			Calathus advena Leconte, 1848	Animalia	Arthropoda	Insecta	Coleoptera	Carabidae	Calathus	advena		Leconte, 1848
urn:catalog:EMEC:EMEC:344708	2/14/2016	https://creativecommons.org/publicdomain/zero/1.0/	http://vertnet.org/resources/norms.html	http://essigdb.berkeley.edu/cgi/eme_query?bnhm_id=EMEC344708&one=T	EMEC	EMEC	PreservedSpecimen	EMEC344708	Kipling Will, Frank Hsu, Riva Madan	1	adult	pin	6/13/2015	United States	Nevada	White Pine County	Great Basin National Park, Wheeler Peak Trailhead		3036		39.00944	-114.30722	WGS1984	10			Calathus advena Leconte, 1848	Animalia	Arthropoda	Insecta	Coleoptera	Carabidae	Calathus	advena		Leconte, 1848
urn:catalog:EMEC:EMEC:344709	2/14/2016	https://creativecommons.org/publicdomain/zero/1.0/	http://vertnet.org/resources/norms.html	http://essigdb.berkeley.edu/cgi/eme_query?bnhm_id=EMEC344709&one=T	EMEC	EMEC	PreservedSpecimen	EMEC344709	Kipling Will, Frank Hsu, Riva Madan	1	adult	pin	6/13/2015	United States	Nevada	White Pine County	Great Basin National Park, Wheeler Peak Trailhead		3036		39.00944	-114.30722	WGS1984	10			Calathus advena Leconte, 1848	Animalia	Arthropoda	Insecta	Coleoptera	Carabidae	Calathus	advena		Leconte, 1848
urn:catalog:EMEC:EMEC:344710	2/14/2016	https://creativecommons.org/publicdomain/zero/1.0/	http://vertnet.org/resources/norms.html	http://essigdb.berkeley.edu/cgi/eme_query?bnhm_id=EMEC344710&one=T	EMEC	EMEC	PreservedSpecimen	EMEC344710	Kipling Will, Frank Hsu, Riva Madan	1	adult	pin	6/13/2015	United States	Nevada	White Pine County	Great Basin National Park, Wheeler Peak Trailhead		3036		39.00944	-114.30722	WGS1984	10			Calathus advena Leconte, 1848	Animalia	Arthropoda	Insecta	Coleoptera	Carabidae	Calathus	advena		Leconte, 1848
urn:catalog:EMEC:EMEC:344711	2/14/2016	https://creativecommons.org/publicdomain/zero/1.0/	http://vertnet.org/resources/norms.html	http://essigdb.berkeley.edu/cgi/eme_query?bnhm_id=EMEC344711&one=T	EMEC	EMEC	PreservedSpecimen	EMEC344711	Kipling Will, Frank Hsu, Riva Madan	1	adult	pin	6/13/2015	United States	Nevada	White Pine County	Great Basin National Park, Wheeler Peak Trailhead		3036		39.00944	-114.30722	WGS1984	10			Calathus advena Leconte, 1848	Animalia	Arthropoda	Insecta	Coleoptera	Carabidae	Calathus	advena		Leconte, 1848
urn:catalog:EMEC:EMEC:344712	2/14/2016	https://creativecommons.org/publicdomain/zero/1.0/	http://vertnet.org/resources/norms.html	http://essigdb.berkeley.edu/cgi/eme_query?bnhm_id=EMEC344712&one=T	EMEC	EMEC	PreservedSpecimen	EMEC344712	Kipling Will, Frank Hsu, Riva Madan	1	adult	pin	6/13/2015	United States	Nevada	White Pine County	Great Basin National Park, Wheeler Peak Trailhead		3036		39.00944	-114.30722	WGS1984	10			Calathus advena Leconte, 1848	Animalia	Arthropoda	Insecta	Coleoptera	Carabidae	Calathus	advena		Leconte, 1848
urn:catalog:EMEC:EMEC:344713	2/14/2016	https://creativecommons.org/publicdomain/zero/1.0/	http://vertnet.org/resources/norms.html	http://essigdb.berkeley.edu/cgi/eme_query?bnhm_id=EMEC344713&one=T	EMEC	EMEC	PreservedSpecimen	EMEC344713	Kipling Will, Frank Hsu, Riva Madan	1	adult	pin	6/13/2015	United States	Nevada	White Pine County	Great Basin National Park, Wheeler Peak Trailhead		3036		39.00944	-114.30722	WGS1984	10			Calathus advena Leconte, 1848	Animalia	Arthropoda	Insecta	Coleoptera	Carabidae	Calathus	advena		Leconte, 1848
urn:catalog:EMEC:EMEC:344714	2/14/2016	https://creativecommons.org/publicdomain/zero/1.0/	http://vertnet.org/resources/norms.html	http://essigdb.berkeley.edu/cgi/eme_query?bnhm_id=EMEC344714&one=T	EMEC	EMEC	PreservedSpecimen	EMEC344714	Kipling Will, Frank Hsu, Riva Madan	1	adult	pin	6/13/2015	United States	Nevada	White Pine County	Great Basin National Park, Wheeler Peak Trailhead		3036		39.00944	-114.30722	WGS1984	10			Calathus advena Leconte, 1848	Animalia	Arthropoda	Insecta	Coleoptera	Carabidae	Calathus	advena		Leconte, 1848
urn:catalog:EMEC:EMEC:344715	2/14/2016	https://creativecommons.org/publicdomain/zero/1.0/	http://vertnet.org/resources/norms.html	http://essigdb.berkeley.edu/cgi/eme_query?bnhm_id=EMEC344715&one=T	EMEC	EMEC	PreservedSpecimen	EMEC344715	Kipling Will, Frank Hsu, Riva Madan	1	adult	pin	6/13/2015	United States	Nevada	White Pine County	Great Basin National Park, Wheeler Peak Trailhead		3036		39.00944	-114.30722	WGS1984	10			Calathus advena Leconte, 1848	Animalia	Arthropoda	Insecta	Coleoptera	Carabidae	Calathus	advena		Leconte, 1848
urn:catalog:EMEC:EMEC:344716	2/14/2016	https://creativecommons.org/publicdomain/zero/1.0/	http://vertnet.org/resources/norms.html	http://essigdb.berkeley.edu/cgi/eme_query?bnhm_id=EMEC344716&one=T	EMEC	EMEC	PreservedSpecimen	EMEC344716	Kipling Will, Frank Hsu, Riva Madan	1	adult	pin	6/13/2015	United States	Nevada	White Pine County	Great Basin National Park, Wheeler Peak Trailhead		3036		39.00944	-114.30722	WGS1984	10			Calathus advena Leconte, 1848	Animalia	Arthropoda	Insecta	Coleoptera	Carabidae	Calathus	advena		Leconte, 1848
urn:catalog:EMEC:EMEC:344717	2/14/2016	https://creativecommons.org/publicdomain/zero/1.0/	http://vertnet.org/resources/norms.html	http://essigdb.berkeley.edu/cgi/eme_query?bnhm_id=EMEC344717&one=T	EMEC	EMEC	PreservedSpecimen	EMEC344717	Kipling Will, Frank Hsu, Riva Madan	1	adult	pin	6/12/2015	United States	Nevada	White Pine County	Great Basin National Park, Teresa Lake		3140		39.0025	-114.31222	WGS1984	10			Calathus advena Leconte, 1848	Animalia	Arthropoda	Insecta	Coleoptera	Carabidae	Calathus	advena		Leconte, 1848
urn:catalog:EMEC:EMEC:344718	2/14/2016	https://creativecommons.org/publicdomain/zero/1.0/	http://vertnet.org/resources/norms.html	http://essigdb.berkeley.edu/cgi/eme_query?bnhm_id=EMEC344718&one=T	EMEC	EMEC	PreservedSpecimen	EMEC344718	Kipling Will, Frank Hsu, Riva Madan	1	adult	pin	6/12/2015	United States	Nevada	White Pine County	Great Basin National Park, Teresa Lake		3140		39.0025	-114.31222	WGS1984	10			Calathus advena Leconte, 1848	Animalia	Arthropoda	Insecta	Coleoptera	Carabidae	Calathus	advena		Leconte, 1848
urn:catalog:EMEC:EMEC:344719	2/14/2016	https://creativecommons.org/publicdomain/zero/1.0/	http://vertnet.org/resources/norms.html	http://essigdb.berkeley.edu/cgi/eme_query?bnhm_id=EMEC344719&one=T	EMEC	EMEC	PreservedSpecimen	EMEC344719	Kipling Will, Frank Hsu, Riva Madan	1	adult	pin	6/12/2015	United States	Nevada	White Pine County	Great Basin National Park, Teresa Lake		3140		39.0025	-114.31222	WGS1984	10			Calathus advena Leconte, 1848	Animalia	Arthropoda	Insecta	Coleoptera	Carabidae	Calathus	advena		Leconte, 1848
urn:catalog:EMEC:EMEC:344720	2/14/2016	https://creativecommons.org/publicdomain/zero/1.0/	http://vertnet.org/resources/norms.html	http://essigdb.berkeley.edu/cgi/eme_query?bnhm_id=EMEC344720&one=T	EMEC	EMEC	PreservedSpecimen	EMEC344720	Kipling Will, Frank Hsu, Riva Madan	1	adult	pin	6/12/2015	United States	Nevada	White Pine County	Great Basin National Park, Teresa Lake		3140		39.0025	-114.31222	WGS1984	10			Calathus advena Leconte, 1848	Animalia	Arthropoda	Insecta	Coleoptera	Carabidae	Calathus	advena		Leconte, 1848
urn:catalog:EMEC:EMEC:344721	2/14/2016	https://creativecommons.org/publicdomain/zero/1.0/	http://vertnet.org/resources/norms.html	http://essigdb.berkeley.edu/cgi/eme_query?bnhm_id=EMEC344721&one=T	EMEC	EMEC	PreservedSpecimen	EMEC344721	Kipling Will, Frank Hsu, Riva Madan	1	adult	pin	6/12/2015	United States	Nevada	White Pine County	Great Basin National Park, Teresa Lake		3140		39.0025	-114.31222	WGS1984	10			Calathus advena Leconte, 1848	Animalia	Arthropoda	Insecta	Coleoptera	Carabidae	Calathus	advena		Leconte, 1848
urn:catalog:EMEC:EMEC:344722	2/14/2016	https://creativecommons.org/publicdomain/zero/1.0/	http://vertnet.org/resources/norms.html	http://essigdb.berkeley.edu/cgi/eme_query?bnhm_id=EMEC344722&one=T	EMEC	EMEC	PreservedSpecimen	EMEC344722	Kipling Will, Frank Hsu, Riva Madan	1	adult	pin	6/12/2015	United States	Nevada	White Pine County	Great Basin National Park, Teresa Lake		3140		39.0025	-114.31222	WGS1984	10			Calathus advena Leconte, 1848	Animalia	Arthropoda	Insecta	Coleoptera	Carabidae	Calathus	advena		Leconte, 1848
urn:catalog:EMEC:EMEC:344723	2/14/2016	https://creativecommons.org/publicdomain/zero/1.0/	http://vertnet.org/resources/norms.html	http://essigdb.berkeley.edu/cgi/eme_query?bnhm_id=EMEC344723&one=T	EMEC	EMEC	PreservedSpecimen	EMEC344723	Kipling Will, Frank Hsu, Riva Madan	1	adult	pin	6/12/2015	United States	Nevada	White Pine County	Great Basin National Park, Teresa Lake		3140		39.0025	-114.31222	WGS1984	10			Calathus advena Leconte, 1848	Animalia	Arthropoda	Insecta	Coleoptera	Carabidae	Calathus	advena		Leconte, 1848
urn:catalog:EMEC:EMEC:344724	2/14/2016	https://creativecommons.org/publicdomain/zero/1.0/	http://vertnet.org/resources/norms.html	http://essigdb.berkeley.edu/cgi/eme_query?bnhm_id=EMEC344724&one=T	EMEC	EMEC	PreservedSpecimen	EMEC344724	Kipling Will, Frank Hsu, Riva Madan	1	adult	pin	6/12/2015	United States	Nevada	White Pine County	Great Basin National Park, Teresa Lake		3140		39.0025	-114.31222	WGS1984	10			Calathus advena Leconte, 1848	Animalia	Arthropoda	Insecta	Coleoptera	Carabidae	Calathus	advena		Leconte, 1848
urn:catalog:EMEC:EMEC:344678		https://creativecommons.org/publicdomain/zero/1.0/	http://vertnet.org/resources/norms.html	http://essigdb.berkeley.edu/cgi/eme_query?bnhm_id=EMEC344678&one=T	EMEC	EMEC	PreservedSpecimen	EMEC344678	Kipling Will, D. R. Maddison, John Sproul	1	adult	pin	6/16/2013	United States	Nevada	Elko County	Ruby Range, Lamoille Canyon		2872		40.5947	-115.3833	WGS1984	10			Calathus advena Leconte, 1848	Animalia	Arthropoda	Insecta	Coleoptera	Carabidae	Calathus	advena		Leconte, 1848
urn:catalog:EMEC:EMEC:344679		https://creativecommons.org/publicdomain/zero/1.0/	http://vertnet.org/resources/norms.html	http://essigdb.berkeley.edu/cgi/eme_query?bnhm_id=EMEC344679&one=T	EMEC	EMEC	PreservedSpecimen	EMEC344679	Kipling Will, D. R. Maddison, John Sproul	1	adult	pin	6/16/2013	United States	Nevada	Elko County	Ruby Range, Lamoille Canyon		2872		40.5947	-115.3833	WGS1984	10			Calathus advena Leconte, 1848	Animalia	Arthropoda	Insecta	Coleoptera	Carabidae	Calathus	advena		Leconte, 1848
urn:catalog:EMEC:EMEC:344680		https://creativecommons.org/publicdomain/zero/1.0/	http://vertnet.org/resources/norms.html	http://essigdb.berkeley.edu/cgi/eme_query?bnhm_id=EMEC344680&one=T	EMEC	EMEC	PreservedSpecimen	EMEC344680	Kipling Will, D. R. Maddison, John Sproul	1	adult	pin	6/16/2013	United States	Nevada	Elko County	Ruby Range, Lamoille Canyon		2872		40.5947	-115.3833	WGS1984	10			Calathus advena Leconte, 1848	Animalia	Arthropoda	Insecta	Coleoptera	Carabidae	Calathus	advena		Leconte, 1848
urn:catalog:EMEC:EMEC:344681	2/14/2016	https://creativecommons.org/publicdomain/zero/1.0/	http://vertnet.org/resources/norms.html	http://essigdb.berkeley.edu/cgi/eme_query?bnhm_id=EMEC344681&one=T	EMEC	EMEC	PreservedSpecimen	EMEC344681	Kipling Will, Frank Hsu, Riva Madan	1	adult	pin	2015-06-10/2015-06-13	United States	Nevada	White Pine County	Great Basin National Park, Snake Creek		2491		38.92528	-114.25222	WGS1984	10			Calathus advena Leconte, 1848	Animalia	Arthropoda	Insecta	Coleoptera	Carabidae	Calathus	advena		Leconte, 1848
urn:catalog:EMEC:EMEC:344682	2/14/2016	https://creativecommons.org/publicdomain/zero/1.0/	http://vertnet.org/resources/norms.html	http://essigdb.berkeley.edu/cgi/eme_query?bnhm_id=EMEC344682&one=T	EMEC	EMEC	PreservedSpecimen	EMEC344682	Kipling Will, Frank Hsu, Riva Madan	1	adult	pin	2015-06-10/2015-06-13	United States	Nevada	White Pine County	Great Basin National Park, Snake Creek		2491		38.92528	-114.25222	WGS1984	10			Calathus advena Leconte, 1848	Animalia	Arthropoda	Insecta	Coleoptera	Carabidae	Calathus	advena		Leconte, 1848
urn:catalog:EMEC:EMEC:344683	2/14/2016	https://creativecommons.org/publicdomain/zero/1.0/	http://vertnet.org/resources/norms.html	http://essigdb.berkeley.edu/cgi/eme_query?bnhm_id=EMEC344683&one=T	EMEC	EMEC	PreservedSpecimen	EMEC344683	Kipling Will, Frank Hsu, Riva Madan	1	adult	pin	2015-06-10/2015-06-13	United States	Nevada	White Pine County	Great Basin National Park, Snake Creek		2491		38.92528	-114.25222	WGS1984	10			Calathus advena Leconte, 1848	Animalia	Arthropoda	Insecta	Coleoptera	Carabidae	Calathus	advena		Leconte, 1848
urn:catalog:EMEC:EMEC:344684	2/14/2016	https://creativecommons.org/publicdomain/zero/1.0/	http://vertnet.org/resources/norms.html	http://essigdb.berkeley.edu/cgi/eme_query?bnhm_id=EMEC344684&one=T	EMEC	EMEC	PreservedSpecimen	EMEC344684	Kipling Will, Frank Hsu, Riva Madan	1	adult	pin	2015-06-10/2015-06-13	United States	Nevada	White Pine County	Great Basin National Park, Snake Creek		2491		38.92528	-114.25222	WGS1984	10			Calathus advena Leconte, 1848	Animalia	Arthropoda	Insecta	Coleoptera	Carabidae	Calathus	advena		Leconte, 1848
urn:catalog:EMEC:EMEC:344685	2/14/2016	https://creativecommons.org/publicdomain/zero/1.0/	http://vertnet.org/resources/norms.html	http://essigdb.berkeley.edu/cgi/eme_query?bnhm_id=EMEC344685&one=T	EMEC	EMEC	PreservedSpecimen	EMEC344685	Kipling Will, Frank Hsu, Riva Madan	1	adult	pin	2015-06-10/2015-06-13	United States	Nevada	White Pine County	Great Basin National Park, Snake Creek		2491		38.92528	-114.25222	WGS1984	10			Calathus advena Leconte, 1848	Animalia	Arthropoda	Insecta	Coleoptera	Carabidae	Calathus	advena		Leconte, 1848
urn:catalog:EMEC:EMEC:344686	2/14/2016	https://creativecommons.org/publicdomain/zero/1.0/	http://vertnet.org/resources/norms.html	http://essigdb.berkeley.edu/cgi/eme_query?bnhm_id=EMEC344686&one=T	EMEC	EMEC	PreservedSpecimen	EMEC344686	Kipling Will, Frank Hsu, Riva Madan	1	adult	pin	2015-06-10/2015-06-13	United States	Nevada	White Pine County	Great Basin National Park, Snake Creek		2491		38.92528	-114.25222	WGS1984	10			Calathus advena Leconte, 1848	Animalia	Arthropoda	Insecta	Coleoptera	Carabidae	Calathus	advena		Leconte, 1848
urn:catalog:EMEC:EMEC:344687	2/14/2016	https://creativecommons.org/publicdomain/zero/1.0/	http://vertnet.org/resources/norms.html	http://essigdb.berkeley.edu/cgi/eme_query?bnhm_id=EMEC344687&one=T	EMEC	EMEC	PreservedSpecimen	EMEC344687	Kipling Will, Frank Hsu, Riva Madan	1	adult	pin	2015-06-10/2015-06-13	United States	Nevada	White Pine County	Great Basin National Park, Snake Creek		2491		38.92528	-114.25222	WGS1984	10			Calathus advena Leconte, 1848	Animalia	Arthropoda	Insecta	Coleoptera	Carabidae	Calathus	advena		Leconte, 1848
urn:catalog:EMEC:EMEC:344688	2/14/2016	https://creativecommons.org/publicdomain/zero/1.0/	http://vertnet.org/resources/norms.html	http://essigdb.berkeley.edu/cgi/eme_query?bnhm_id=EMEC344688&one=T	EMEC	EMEC	PreservedSpecimen	EMEC344688	Kipling Will, Frank Hsu, Riva Madan	1	adult	pin	2015-06-10/2015-06-13	United States	Nevada	White Pine County	Great Basin National Park, Snake Creek		2491		38.92528	-114.25222	WGS1984	10			Calathus advena Leconte, 1848	Animalia	Arthropoda	Insecta	Coleoptera	Carabidae	Calathus	advena		Leconte, 1848
urn:catalog:EMEC:EMEC:344689	2/14/2016	https://creativecommons.org/publicdomain/zero/1.0/	http://vertnet.org/resources/norms.html	http://essigdb.berkeley.edu/cgi/eme_query?bnhm_id=EMEC344689&one=T	EMEC	EMEC	PreservedSpecimen	EMEC344689	Kipling Will, Frank Hsu, Riva Madan	1	adult	pin	2015-06-10/2015-06-13	United States	Nevada	White Pine County	Great Basin National Park, Snake Creek		2491		38.92528	-114.25222	WGS1984	10			Calathus advena Leconte, 1848	Animalia	Arthropoda	Insecta	Coleoptera	Carabidae	Calathus	advena		Leconte, 1848
urn:catalog:EMEC:EMEC:344690	2/14/2016	https://creativecommons.org/publicdomain/zero/1.0/	http://vertnet.org/resources/norms.html	http://essigdb.berkeley.edu/cgi/eme_query?bnhm_id=EMEC344690&one=T	EMEC	EMEC	PreservedSpecimen	EMEC344690	Kipling Will, Frank Hsu, Riva Madan	1	adult	pin	2015-06-10/2015-06-13	United States	Nevada	White Pine County	Great Basin National Park, Snake Creek		2491		38.92528	-114.25222	WGS1984	10			Calathus advena Leconte, 1848	Animalia	Arthropoda	Insecta	Coleoptera	Carabidae	Calathus	advena		Leconte, 1848
urn:catalog:EMEC:EMEC:344691	2/14/2016	https://creativecommons.org/publicdomain/zero/1.0/	http://vertnet.org/resources/norms.html	http://essigdb.berkeley.edu/cgi/eme_query?bnhm_id=EMEC344691&one=T	EMEC	EMEC	PreservedSpecimen	EMEC344691	Kipling Will, Frank Hsu, Riva Madan	1	adult	pin	2015-06-10/2015-06-13	United States	Nevada	White Pine County	Great Basin National Park, Snake Creek		2491		38.92528	-114.25222	WGS1984	10			Calathus advena Leconte, 1848	Animalia	Arthropoda	Insecta	Coleoptera	Carabidae	Calathus	advena		Leconte, 1848
urn:catalog:EMEC:EMEC:344692	2/14/2016	https://creativecommons.org/publicdomain/zero/1.0/	http://vertnet.org/resources/norms.html	http://essigdb.berkeley.edu/cgi/eme_query?bnhm_id=EMEC344692&one=T	EMEC	EMEC	PreservedSpecimen	EMEC344692	Kipling Will, Frank Hsu, Riva Madan	1	adult	pin	2015-06-10/2015-06-13	United States	Nevada	White Pine County	Great Basin National Park, Snake Creek		2491		38.92528	-114.25222	WGS1984	10			Calathus advena Leconte, 1848	Animalia	Arthropoda	Insecta	Coleoptera	Carabidae	Calathus	advena		Leconte, 1848
urn:catalog:EMEC:EMEC:344693	2/14/2016	https://creativecommons.org/publicdomain/zero/1.0/	http://vertnet.org/resources/norms.html	http://essigdb.berkeley.edu/cgi/eme_query?bnhm_id=EMEC344693&one=T	EMEC	EMEC	PreservedSpecimen	EMEC344693	Kipling Will, Frank Hsu, Riva Madan	1	adult	pin	6/12/2015	United States	Nevada	White Pine County	Great Basin National Park, Lower Wheeler Peak Trail		3120		39.005	-114.31	WGS1984	10			Calathus advena Leconte, 1848	Animalia	Arthropoda	Insecta	Coleoptera	Carabidae	Calathus	advena		Leconte, 1848
urn:catalog:EMEC:EMEC:344694	2/14/2016	https://creativecommons.org/publicdomain/zero/1.0/	http://vertnet.org/resources/norms.html	http://essigdb.berkeley.edu/cgi/eme_query?bnhm_id=EMEC344694&one=T	EMEC	EMEC	PreservedSpecimen	EMEC344694	Kipling Will, Frank Hsu, Riva Madan	1	adult	pin	2015-06-11/2015-06-13	United States	Nevada	White Pine County	Great Basin National Park, Blue Canyon		2433		39.05361	-114.3025	WGS1984	10			Calathus advena Leconte, 1848	Animalia	Arthropoda	Insecta	Coleoptera	Carabidae	Calathus	advena		Leconte, 1848
urn:catalog:EMEC:EMEC:344695	2/14/2016	https://creativecommons.org/publicdomain/zero/1.0/	http://vertnet.org/resources/norms.html	http://essigdb.berkeley.edu/cgi/eme_query?bnhm_id=EMEC344695&one=T	EMEC	EMEC	PreservedSpecimen	EMEC344695	Kipling Will, Frank Hsu, Riva Madan	1	adult	pin	2015-06-11/2015-06-13	United States	Nevada	White Pine County	Great Basin National Park, Blue Canyon		2433		39.05361	-114.3025	WGS1984	10			Calathus advena Leconte, 1848	Animalia	Arthropoda	Insecta	Coleoptera	Carabidae	Calathus	advena		Leconte, 1848
urn:catalog:EMEC:EMEC:344696	2/14/2016	https://creativecommons.org/publicdomain/zero/1.0/	http://vertnet.org/resources/norms.html	http://essigdb.berkeley.edu/cgi/eme_query?bnhm_id=EMEC344696&one=T	EMEC	EMEC	PreservedSpecimen	EMEC344696	Kipling Will, Frank Hsu, Riva Madan	1	adult	pin	2015-06-11/2015-06-13	United States	Nevada	White Pine County	Great Basin National Park, Blue Canyon		2433		39.05361	-114.3025	WGS1984	10			Calathus advena Leconte, 1848	Animalia	Arthropoda	Insecta	Coleoptera	Carabidae	Calathus	advena		Leconte, 1848
urn:catalog:EMEC:EMEC:344697	2/14/2016	https://creativecommons.org/publicdomain/zero/1.0/	http://vertnet.org/resources/norms.html	http://essigdb.berkeley.edu/cgi/eme_query?bnhm_id=EMEC344697&one=T	EMEC	EMEC	PreservedSpecimen	EMEC344697	Kipling Will, Frank Hsu, Riva Madan	1	adult	pin	2015-06-11/2015-06-13	United States	Nevada	White Pine County	Great Basin National Park, Blue Canyon		2433		39.05361	-114.3025	WGS1984	10			Calathus advena Leconte, 1848	Animalia	Arthropoda	Insecta	Coleoptera	Carabidae	Calathus	advena		Leconte, 1848
urn:catalog:EMEC:EMEC:344698	2/14/2016	https://creativecommons.org/publicdomain/zero/1.0/	http://vertnet.org/resources/norms.html	http://essigdb.berkeley.edu/cgi/eme_query?bnhm_id=EMEC344698&one=T	EMEC	EMEC	PreservedSpecimen	EMEC344698	Kipling Will, Frank Hsu, Riva Madan	1	adult	pin	2015-06-11/2015-06-13	United States	Nevada	White Pine County	Great Basin National Park, Blue Canyon		2433		39.05361	-114.3025	WGS1984	10			Calathus advena Leconte, 1848	Animalia	Arthropoda	Insecta	Coleoptera	Carabidae	Calathus	advena		Leconte, 1848
urn:catalog:EMEC:EMEC:344699	2/14/2016	https://creativecommons.org/publicdomain/zero/1.0/	http://vertnet.org/resources/norms.html	http://essigdb.berkeley.edu/cgi/eme_query?bnhm_id=EMEC344699&one=T	EMEC	EMEC	PreservedSpecimen	EMEC344699	Kipling Will, Frank Hsu, Riva Madan	1	adult	pin	2015-06-11/2015-06-13	United States	Nevada	White Pine County	Great Basin National Park, Blue Canyon		2433		39.05361	-114.3025	WGS1984	10			Calathus advena Leconte, 1848	Animalia	Arthropoda	Insecta	Coleoptera	Carabidae	Calathus	advena		Leconte, 1848
urn:catalog:EMEC:EMEC:344700	2/14/2016	https://creativecommons.org/publicdomain/zero/1.0/	http://vertnet.org/resources/norms.html	http://essigdb.berkeley.edu/cgi/eme_query?bnhm_id=EMEC344700&one=T	EMEC	EMEC	PreservedSpecimen	EMEC344700	Kipling Will, Frank Hsu, Riva Madan	1	adult	pin	2015-06-11/2015-06-13	United States	Nevada	White Pine County	Great Basin National Park, Blue Canyon		2433		39.05361	-114.3025	WGS1984	10			Calathus advena Leconte, 1848	Animalia	Arthropoda	Insecta	Coleoptera	Carabidae	Calathus	advena		Leconte, 1848
urn:catalog:EMEC:EMEC:344701	2/14/2016	https://creativecommons.org/publicdomain/zero/1.0/	http://vertnet.org/resources/norms.html	http://essigdb.berkeley.edu/cgi/eme_query?bnhm_id=EMEC344701&one=T	EMEC	EMEC	PreservedSpecimen	EMEC344701	Kipling Will, Frank Hsu, Riva Madan	1	adult	pin	2015-06-11/2015-06-13	United States	Nevada	White Pine County	Great Basin National Park, Blue Canyon		2433		39.05361	-114.3025	WGS1984	10			Calathus advena Leconte, 1848	Animalia	Arthropoda	Insecta	Coleoptera	Carabidae	Calathus	advena		Leconte, 1848
urn:catalog:EMEC:EMEC:344702	2/14/2016	https://creativecommons.org/publicdomain/zero/1.0/	http://vertnet.org/resources/norms.html	http://essigdb.berkeley.edu/cgi/eme_query?bnhm_id=EMEC344702&one=T	EMEC	EMEC	PreservedSpecimen	EMEC344702	Kipling Will, Frank Hsu, Riva Madan	1	adult	pin	2015-06-11/2015-06-13	United States	Nevada	White Pine County	Great Basin National Park, Blue Canyon		2433		39.05361	-114.3025	WGS1984	10			Calathus advena Leconte, 1848	Animalia	Arthropoda	Insecta	Coleoptera	Carabidae	Calathus	advena		Leconte, 1848
urn:catalog:EMEC:EMEC:344703	2/14/2016	https://creativecommons.org/publicdomain/zero/1.0/	http://vertnet.org/resources/norms.html	http://essigdb.berkeley.edu/cgi/eme_query?bnhm_id=EMEC344703&one=T	EMEC	EMEC	PreservedSpecimen	EMEC344703	Kipling Will, Frank Hsu, Riva Madan	1	adult	pin	2015-06-11/2015-06-13	United States	Nevada	White Pine County	Great Basin National Park, Blue Canyon		2433		39.05361	-114.3025	WGS1984	10			Calathus advena Leconte, 1848	Animalia	Arthropoda	Insecta	Coleoptera	Carabidae	Calathus	advena		Leconte, 1848
urn:catalog:EMEC:EMEC:344704	2/14/2016	https://creativecommons.org/publicdomain/zero/1.0/	http://vertnet.org/resources/norms.html	http://essigdb.berkeley.edu/cgi/eme_query?bnhm_id=EMEC344704&one=T	EMEC	EMEC	PreservedSpecimen	EMEC344704	Kipling Will, Frank Hsu, Riva Madan	1	adult	pin	2015-06-11/2015-06-13	United States	Nevada	White Pine County	Great Basin National Park, Blue Canyon		2433		39.05361	-114.3025	WGS1984	10			Calathus advena Leconte, 1848	Animalia	Arthropoda	Insecta	Coleoptera	Carabidae	Calathus	advena		Leconte, 1848
urn:catalog:EMEC:EMEC:211170	7/4/2016	https://creativecommons.org/publicdomain/zero/1.0/	http://vertnet.org/resources/norms.html	http://essigdb.berkeley.edu/cgi/eme_query?bnhm_id=EMEC211170&one=T	EMEC	EMEC	PreservedSpecimen	EMEC211170	J. Doyen	1	adult	pin	7/12/1971	United States	Nevada	White Pine County	Mt. Wheeler	10,000\'	3048		39.00972	-114.30667	WGS1984	600			Calathus advena Leconte, 1848	Animalia	Arthropoda	Insecta	Coleoptera	Carabidae	Calathus	advena		Leconte, 1848
urn:catalog:EMEC:EMEC:344676	7/4/2016	https://creativecommons.org/publicdomain/zero/1.0/	http://vertnet.org/resources/norms.html	http://essigdb.berkeley.edu/cgi/eme_query?bnhm_id=EMEC344676&one=T	EMEC	EMEC	PreservedSpecimen	EMEC344676	J. Doyen	1	adult	pin	7/12/1971	United States	Nevada	White Pine County	Mt. Wheeler	10,000\'	3048		39.00972	-114.30667	WGS1984	600			Calathus advena Leconte, 1848	Animalia	Arthropoda	Insecta	Coleoptera	Carabidae	Calathus	advena		Leconte, 1848
urn:catalog:EMEC:EMEC:344677	7/4/2016	https://creativecommons.org/publicdomain/zero/1.0/	http://vertnet.org/resources/norms.html	http://essigdb.berkeley.edu/cgi/eme_query?bnhm_id=EMEC344677&one=T	EMEC	EMEC	PreservedSpecimen	EMEC344677	J. Doyen	1	adult	pin	7/12/1971	United States	Nevada	White Pine County	Mt. Wheeler	10,000\'	3048		39.00972	-114.30667	WGS1984	600			Calathus advena Leconte, 1848	Animalia	Arthropoda	Insecta	Coleoptera	Carabidae	Calathus	advena		Leconte, 1848
urn:catalog:EMEC:EMEC:1137660	4/5/2016	https://creativecommons.org/publicdomain/zero/1.0/	http://vertnet.org/resources/norms.html	http://essigdb.berkeley.edu/cgi/eme_query?bnhm_id=EMEC1137660&one=T	EMEC	EMEC	PreservedSpecimen	EMEC1137660	J. Hafernik, S. L. Szerlip	1	adult	pin	6/10/1973	United States	Nevada	Nye County	East Face of Toiyabe Mountains at Bowman Creek	6600-7000\'el	2011.68	2133.6	39.17186	-117.10722	WGS1984	1000			Calosoma prominens LeConte, 1853	Animalia	Arthropoda	Insecta	Coleoptera	Carabidae	Calosoma	prominens		LeConte, 1853
urn:catalog:EMEC:EMEC:1137640		https://creativecommons.org/publicdomain/zero/1.0/	http://vertnet.org/resources/norms.html	http://essigdb.berkeley.edu/cgi/eme_query?bnhm_id=EMEC1137640&one=T	EMEC	EMEC	PreservedSpecimen	EMEC1137640	Kipling Will, Rolf Aalbu	1	adult	pin	6/4/2012	United States	Nevada	Nye County	0.7km NNE Dobbin Summit		2560		38.945	-116.5122	WGS1984	10			Carabus taedatus agassii LeConte, 1850	Animalia	Arthropoda	Insecta	Coleoptera	Carabidae	Carabus	taedatus	agassii	LeConte, 1850
urn:catalog:EMEC:EMEC:1137641		https://creativecommons.org/publicdomain/zero/1.0/	http://vertnet.org/resources/norms.html	http://essigdb.berkeley.edu/cgi/eme_query?bnhm_id=EMEC1137641&one=T	EMEC	EMEC	PreservedSpecimen	EMEC1137641	Kipling Will, Rolf Aalbu	1	adult	pin	6/4/2012	United States	Nevada	Nye County	0.7km NNE Dobbin Summit		2560		38.945	-116.5122	WGS1984	10			Carabus taedatus agassii LeConte, 1850	Animalia	Arthropoda	Insecta	Coleoptera	Carabidae	Carabus	taedatus	agassii	LeConte, 1850
urn:catalog:EMEC:EMEC:1137642		https://creativecommons.org/publicdomain/zero/1.0/	http://vertnet.org/resources/norms.html	http://essigdb.berkeley.edu/cgi/eme_query?bnhm_id=EMEC1137642&one=T	EMEC	EMEC	PreservedSpecimen	EMEC1137642	Kipling Will, Rolf Aalbu	1	adult	pin	6/4/2012	United States	Nevada	Nye County	0.7km NNE Dobbin Summit		2560		38.945	-116.5122	WGS1984	10			Carabus taedatus agassii LeConte, 1850	Animalia	Arthropoda	Insecta	Coleoptera	Carabidae	Carabus	taedatus	agassii	LeConte, 1850
urn:catalog:EMEC:EMEC:1137643	2/14/2016	https://creativecommons.org/publicdomain/zero/1.0/	http://vertnet.org/resources/norms.html	http://essigdb.berkeley.edu/cgi/eme_query?bnhm_id=EMEC1137643&one=T	EMEC	EMEC	PreservedSpecimen	EMEC1137643	Kipling Will, Frank Hsu, Riva Madan	1	adult	pin	6/12/2015	United States	Nevada	White Pine County	Great Basin National Park, Snake Creek		2163		38.91639	-114.18917	WGS1984	10			Carabus taedatus agassii LeConte, 1850	Animalia	Arthropoda	Insecta	Coleoptera	Carabidae	Carabus	taedatus	agassii	LeConte, 1850
urn:catalog:EMEC:EMEC:1137644	2/14/2016	https://creativecommons.org/publicdomain/zero/1.0/	http://vertnet.org/resources/norms.html	http://essigdb.berkeley.edu/cgi/eme_query?bnhm_id=EMEC1137644&one=T	EMEC	EMEC	PreservedSpecimen	EMEC1137644	Kipling Will, Frank Hsu, Riva Madan	1	adult	pin	6/12/2015	United States	Nevada	White Pine County	Great Basin National Park, Snake Creek		2163		38.91639	-114.18917	WGS1984	10			Carabus taedatus agassii LeConte, 1850	Animalia	Arthropoda	Insecta	Coleoptera	Carabidae	Carabus	taedatus	agassii	LeConte, 1850
urn:catalog:EMEC:EMEC:1137645	2/14/2016	https://creativecommons.org/publicdomain/zero/1.0/	http://vertnet.org/resources/norms.html	http://essigdb.berkeley.edu/cgi/eme_query?bnhm_id=EMEC1137645&one=T	EMEC	EMEC	PreservedSpecimen	EMEC1137645	Kipling Will, Frank Hsu, Riva Madan	1	adult	pin	6/12/2015	United States	Nevada	White Pine County	Great Basin National Park, Snake Creek		2163		38.91639	-114.18917	WGS1984	10			Carabus taedatus agassii LeConte, 1850	Animalia	Arthropoda	Insecta	Coleoptera	Carabidae	Carabus	taedatus	agassii	LeConte, 1850
urn:catalog:EMEC:EMEC:1137646	2/14/2016	https://creativecommons.org/publicdomain/zero/1.0/	http://vertnet.org/resources/norms.html	http://essigdb.berkeley.edu/cgi/eme_query?bnhm_id=EMEC1137646&one=T	EMEC	EMEC	PreservedSpecimen	EMEC1137646	Kipling Will, Frank Hsu, Riva Madan	1	adult	pin	6/13/2015	United States	Nevada	White Pine County	Great Basin National Park, Wheeler Peak Trailhead		3036		39.00944	-114.30722	WGS1984	10			Carabus taedatus agassii LeConte, 1850	Animalia	Arthropoda	Insecta	Coleoptera	Carabidae	Carabus	taedatus	agassii	LeConte, 1850
urn:catalog:EMEC:EMEC:1137647	2/14/2016	https://creativecommons.org/publicdomain/zero/1.0/	http://vertnet.org/resources/norms.html	http://essigdb.berkeley.edu/cgi/eme_query?bnhm_id=EMEC1137647&one=T	EMEC	EMEC	PreservedSpecimen	EMEC1137647	Kipling Will, Frank Hsu, Riva Madan	1	adult	pin	6/13/2015	United States	Nevada	White Pine County	Great Basin National Park, Wheeler Peak Trailhead		3036		39.00944	-114.30722	WGS1984	10			Carabus taedatus agassii LeConte, 1850	Animalia	Arthropoda	Insecta	Coleoptera	Carabidae	Carabus	taedatus	agassii	LeConte, 1850
urn:catalog:EMEC:EMEC:1137648	2/14/2016	https://creativecommons.org/publicdomain/zero/1.0/	http://vertnet.org/resources/norms.html	http://essigdb.berkeley.edu/cgi/eme_query?bnhm_id=EMEC1137648&one=T	EMEC	EMEC	PreservedSpecimen	EMEC1137648	Kipling Will, Frank Hsu, Riva Madan	1	adult	pin	6/13/2015	United States	Nevada	White Pine County	Great Basin National Park, Wheeler Peak Trailhead		3036		39.00944	-114.30722	WGS1984	10			Carabus taedatus agassii LeConte, 1850	Animalia	Arthropoda	Insecta	Coleoptera	Carabidae	Carabus	taedatus	agassii	LeConte, 1850
urn:catalog:EMEC:EMEC:208864	12/20/2016	https://creativecommons.org/publicdomain/zero/1.0/	http://vertnet.org/resources/norms.html	http://essigdb.berkeley.edu/cgi/eme_query?bnhm_id=EMEC208864&one=T	EMEC	EMEC	PreservedSpecimen	EMEC208864	W. C. Russell	1	adult	pin	6/1/1929	United States	Nevada	White Pine County	Baker Creek	8500ft.	2591		38.97332	-114.25674	WGS1984	1000			Carabus taedatus agassii LeConte, 1850	Animalia	Arthropoda	Insecta	Coleoptera	Carabidae	Carabus	taedatus	agassii	LeConte, 1850
urn:catalog:EMEC:EMEC:208865	12/20/2016	https://creativecommons.org/publicdomain/zero/1.0/	http://vertnet.org/resources/norms.html	http://essigdb.berkeley.edu/cgi/eme_query?bnhm_id=EMEC208865&one=T	EMEC	EMEC	PreservedSpecimen	EMEC208865	La Rivers	1	adult	pin	6/25/1941	United States	Nevada	Elko County	Lamoille				40.72788	-115.47309	WGS1984	3000			Carabus taedatus agassii LeConte, 1850	Animalia	Arthropoda	Insecta	Coleoptera	Carabidae	Carabus	taedatus	agassii	LeConte, 1850
urn:catalog:EMEC:EMEC:208863	12/21/2016	https://creativecommons.org/publicdomain/zero/1.0/	http://vertnet.org/resources/norms.html	http://essigdb.berkeley.edu/cgi/eme_query?bnhm_id=EMEC208863&one=T	EMEC	EMEC	PreservedSpecimen	EMEC208863	J. Doyen	1	adult	pin	7/24/1976	United States	Nevada	White Pine County	Bird Creek Camp				39.46274	-114.65242	WGS1984	1000			Carabus taedatus agassii LeConte, 1850	Animalia	Arthropoda	Insecta	Coleoptera	Carabidae	Carabus	taedatus	agassii	LeConte, 1850
urn:catalog:EMEC:EMEC:705862	12/20/2016	https://creativecommons.org/publicdomain/zero/1.0/	http://vertnet.org/resources/norms.html	http://essigdb.berkeley.edu/cgi/eme_query?bnhm_id=EMEC705862&one=T	EMEC	EMEC	PreservedSpecimen	EMEC705862	T. Ellis	1	adult	pin	7/23/2004	United States	Nevada	White Pine County	Great Basin National Park				38.94512	-114.24082	WGS1984	40000			Carabus taedatus Fabricius, 1787	Animalia	Arthropoda	Insecta	Coleoptera	Carabidae	Carabus	taedatus		Fabricius, 1787
urn:catalog:EMEC:EMEC:705863	12/20/2016	https://creativecommons.org/publicdomain/zero/1.0/	http://vertnet.org/resources/norms.html	http://essigdb.berkeley.edu/cgi/eme_query?bnhm_id=EMEC705863&one=T	EMEC	EMEC	PreservedSpecimen	EMEC705863	T. Ellis	1	adult	pin	7/30/2004	United States	Nevada	White Pine County	Great Basin National Park				38.94512	-114.24082	WGS1984	40000			Carabus taedatus Fabricius, 1787	Animalia	Arthropoda	Insecta	Coleoptera	Carabidae	Carabus	taedatus		Fabricius, 1787
urn:catalog:EMEC:EMEC:705865	12/20/2016	https://creativecommons.org/publicdomain/zero/1.0/	http://vertnet.org/resources/norms.html	http://essigdb.berkeley.edu/cgi/eme_query?bnhm_id=EMEC705865&one=T	EMEC	EMEC	PreservedSpecimen	EMEC705865	T. Ellis	1	adult	pin	7/23/2004	United States	Nevada	White Pine County	Great Basin National Park				38.94512	-114.24082	WGS1984	40000			Carabus taedatus Fabricius, 1787	Animalia	Arthropoda	Insecta	Coleoptera	Carabidae	Carabus	taedatus		Fabricius, 1787
urn:catalog:EMEC:EMEC:705864	12/20/2016	https://creativecommons.org/publicdomain/zero/1.0/	http://vertnet.org/resources/norms.html	http://essigdb.berkeley.edu/cgi/eme_query?bnhm_id=EMEC705864&one=T	EMEC	EMEC	PreservedSpecimen	EMEC705864	M. Horner	1	adult	pin	8/4/2006	United States	Nevada	White Pine County	Great Basin National Park				38.94512	-114.24082	WGS1984	40000			Carabus taedatus Fabricius, 1787	Animalia	Arthropoda	Insecta	Coleoptera	Carabidae	Carabus	taedatus		Fabricius, 1787
urn:catalog:CAS:ENT:8302833	4/5/2016	https://creativecommons.org/publicdomain/zero/1.0/	http://vertnet.org/resources/norms.html	http://essigdb.berkeley.edu/cgi/eme_query?bnhm_id=CASENT8302833&one=T	CAS	ENT	PreservedSpecimen	CASENT8302833	Steve Rodela	1	adult	pin	5/6/1967	United States	Nevada	Clark County	Red Rock				36.13191	-115.45876	WGS1984	5000			Chlaenius obsoletus LeConte, 1851	Animalia	Arthropoda	Insecta	Coleoptera	Carabidae	Chlaenius	obsoletus		LeConte, 1851
urn:catalog:CAS:ENT:8085305	12/20/2016	https://creativecommons.org/publicdomain/zero/1.0/	http://vertnet.org/resources/norms.html	http://essigdb.berkeley.edu/cgi/eme_query?bnhm_id=CASENT8085305&one=T	CAS	ENT	PreservedSpecimen	CASENT8085305	J. R. Slevin	1	adult	pin	5/5/1913	United States	Nevada	Lincoln County	Caliente				37.61496	-114.51194	WGS1984	5000			Chlaenius pennsylvanicus blanditus Casey, 1920	Animalia	Arthropoda	Insecta	Coleoptera	Carabidae	Chlaenius	pennsylvanicus	blanditus	Casey, 1920
urn:catalog:EMEC:EMEC:1139237	4/5/2016	https://creativecommons.org/publicdomain/zero/1.0/	http://vertnet.org/resources/norms.html	http://essigdb.berkeley.edu/cgi/eme_query?bnhm_id=EMEC1139237&one=T	EMEC	EMEC	PreservedSpecimen	EMEC1139237	S.M. Clark	1	adult	pin	7/13/2005	United States	Nevada	Pershing County	Humboldt River, above Rye Patch Reservoir	4140ft.	1261.872		40.7	-118.21667	unknown				Clivina punctulata LeConte, 1852	Animalia	Arthropoda	Insecta	Coleoptera	Carabidae	Clivina	punctulata		LeConte, 1852
urn:catalog:EMEC:EMEC:1139238	4/5/2016	https://creativecommons.org/publicdomain/zero/1.0/	http://vertnet.org/resources/norms.html	http://essigdb.berkeley.edu/cgi/eme_query?bnhm_id=EMEC1139238&one=T	EMEC	EMEC	PreservedSpecimen	EMEC1139238	S.M. Clark	1	adult	pin	7/13/2005	United States	Nevada	Pershing County	Humboldt River, above Rye Patch Reservoir	4140ft.	1261.872		40.7	-118.21667	unknown				Clivina punctulata LeConte, 1852	Animalia	Arthropoda	Insecta	Coleoptera	Carabidae	Clivina	punctulata		LeConte, 1852
urn:catalog:EMEC:EMEC:1139240	4/5/2016	https://creativecommons.org/publicdomain/zero/1.0/	http://vertnet.org/resources/norms.html	http://essigdb.berkeley.edu/cgi/eme_query?bnhm_id=EMEC1139240&one=T	EMEC	EMEC	PreservedSpecimen	EMEC1139240	Andrew H. Barnum	1	adult	pin	8/13/1961	United States	Nevada	Clark County	Lee Canyon				36.3911	-115.59308	WGS1984	11000			Cymindis arizonensis Schaeffer, 1910	Animalia	Arthropoda	Insecta	Coleoptera	Carabidae	Cymindis	arizonensis		Schaeffer, 1910
urn:catalog:CAS:ENT:8085306	12/21/2016	https://creativecommons.org/publicdomain/zero/1.0/	http://vertnet.org/resources/norms.html	http://essigdb.berkeley.edu/cgi/eme_query?bnhm_id=CASENT8085306&one=T	CAS	ENT	PreservedSpecimen	CASENT8085306	J. R. Slevin	1	adult	pin	5/5/1974	United States	Nevada	Lincoln County	Wells				41.11159	-114.96449	WGS1984	1000			Cymindis arizonensis Schaeffer, 1910	Animalia	Arthropoda	Insecta	Coleoptera	Carabidae	Cymindis	arizonensis		Schaeffer, 1910
urn:catalog:EMEC:EMEC:1139245	4/4/2016	https://creativecommons.org/publicdomain/zero/1.0/	http://vertnet.org/resources/norms.html	http://essigdb.berkeley.edu/cgi/eme_query?bnhm_id=EMEC1139245&one=T	EMEC	EMEC	PreservedSpecimen	EMEC1139245		1	adult	pin	4/21/1987	United States	Nevada	Washoe County	Galena Creek at Hwy 431 above Reno				39.35594	-119.85354	WGS1984	100			Diplous aterrimus (Dejean, 1828)	Animalia	Arthropoda	Insecta	Coleoptera	Carabidae	Diplous	aterrimus		(Dejean, 1828)
urn:catalog:EMEC:EMEC:1139246	4/5/2016	https://creativecommons.org/publicdomain/zero/1.0/	http://vertnet.org/resources/norms.html	http://essigdb.berkeley.edu/cgi/eme_query?bnhm_id=EMEC1139246&one=T	EMEC	EMEC	PreservedSpecimen	EMEC1139246	Richard W. Baumann	1	adult	pin	4/3/1981	United States	Nevada	Clark County	Cold Creek Spring Mountains				36.4205	-115.74045	WGS1984	2500			Diplous aterrimus (Dejean, 1828)	Animalia	Arthropoda	Insecta	Coleoptera	Carabidae	Diplous	aterrimus		(Dejean, 1828)
urn:catalog:EMEC:EMEC:1139247	4/5/2016	https://creativecommons.org/publicdomain/zero/1.0/	http://vertnet.org/resources/norms.html	http://essigdb.berkeley.edu/cgi/eme_query?bnhm_id=EMEC1139247&one=T	EMEC	EMEC	PreservedSpecimen	EMEC1139247	Baumann, Mower	1	adult	pin	5/19/1983	United States	Nevada	Washoe County	Galena Creek, Hwy 27 2 miles below Mt. Rose Ski area				39.34336	-119.86934	WGS1984	1000			Diplous aterrimus (Dejean, 1828)	Animalia	Arthropoda	Insecta	Coleoptera	Carabidae	Diplous	aterrimus		(Dejean, 1828)
urn:catalog:EMEC:EMEC:1139248	4/5/2016	https://creativecommons.org/publicdomain/zero/1.0/	http://vertnet.org/resources/norms.html	http://essigdb.berkeley.edu/cgi/eme_query?bnhm_id=EMEC1139248&one=T	EMEC	EMEC	PreservedSpecimen	EMEC1139248	Baumann, Mower	1	adult	pin	5/19/1983	United States	Nevada	Washoe County	Third Creek at Highway 27				39.27376	-119.94796	WGS1984	500			Diplous aterrimus (Dejean, 1828)	Animalia	Arthropoda	Insecta	Coleoptera	Carabidae	Diplous	aterrimus		(Dejean, 1828)
urn:catalog:CAS:ENT:8085307	12/29/2016	https://creativecommons.org/publicdomain/zero/1.0/	http://vertnet.org/resources/norms.html	http://essigdb.berkeley.edu/cgi/eme_query?bnhm_id=CASENT8085307&one=T	CAS	ENT	PreservedSpecimen	CASENT8085307	D. H. Kavanaugh	1	adult	pin	7/26/1971	United States	Nevada	Washoe County	Sierra Nevada, third creek at highway 27	7250\'	2210		39.27376	-119.94796	WGS1984	500			Diplous filicornis (Casey, 1918)	Animalia	Arthropoda	Insecta	Coleoptera	Carabidae	Diplous	filicornis		(Casey, 1918)
urn:catalog:EMEC:EMEC:1138423		https://creativecommons.org/publicdomain/zero/1.0/	http://vertnet.org/resources/norms.html	http://essigdb.berkeley.edu/cgi/eme_query?bnhm_id=EMEC1138423&one=T	EMEC	EMEC	PreservedSpecimen	EMEC1138423	Kipling Will, Frank Hsu, Riva Madan	1	adult	pin	6/11/2015	United States	Nevada	White Pine County	Great Basin Nat. Pk., Lehman Creek		2035		39.01139	-114.21222	WGS1984	10			Discoderus amoenus LeConte, 1863	Animalia	Arthropoda	Insecta	Coleoptera	Carabidae	Discoderus	amoenus		LeConte, 1863
urn:catalog:EMEC:EMEC:1138424		https://creativecommons.org/publicdomain/zero/1.0/	http://vertnet.org/resources/norms.html	http://essigdb.berkeley.edu/cgi/eme_query?bnhm_id=EMEC1138424&one=T	EMEC	EMEC	PreservedSpecimen	EMEC1138424	Kipling Will, Frank Hsu, Riva Madan	1	adult	pin	6/11/2015	United States	Nevada	White Pine County	Great Basin Nat. Pk., Lehman Creek		2035		39.01139	-114.21222	WGS1984	10			Discoderus amoenus LeConte, 1863	Animalia	Arthropoda	Insecta	Coleoptera	Carabidae	Discoderus	amoenus		LeConte, 1863
urn:catalog:EMEC:EMEC:1138425		https://creativecommons.org/publicdomain/zero/1.0/	http://vertnet.org/resources/norms.html	http://essigdb.berkeley.edu/cgi/eme_query?bnhm_id=EMEC1138425&one=T	EMEC	EMEC	PreservedSpecimen	EMEC1138425	Kipling Will, Frank Hsu, Riva Madan	1	adult	pin	6/11/2015	United States	Nevada	White Pine County	Great Basin Nat. Pk., Lehman Creek		2035		39.01139	-114.21222	WGS1984	10			Discoderus amoenus LeConte, 1863	Animalia	Arthropoda	Insecta	Coleoptera	Carabidae	Discoderus	amoenus		LeConte, 1863
urn:catalog:EMEC:EMEC:1138426		https://creativecommons.org/publicdomain/zero/1.0/	http://vertnet.org/resources/norms.html	http://essigdb.berkeley.edu/cgi/eme_query?bnhm_id=EMEC1138426&one=T	EMEC	EMEC	PreservedSpecimen	EMEC1138426	Kipling Will, Frank Hsu, Riva Madan	1	adult	pin	6/11/2015	United States	Nevada	White Pine County	Great Basin Nat. Pk., Lehman Creek		2035		39.01139	-114.21222	WGS1984	10			Discoderus amoenus LeConte, 1863	Animalia	Arthropoda	Insecta	Coleoptera	Carabidae	Discoderus	amoenus		LeConte, 1863
urn:catalog:EMEC:EMEC:1138427		https://creativecommons.org/publicdomain/zero/1.0/	http://vertnet.org/resources/norms.html	http://essigdb.berkeley.edu/cgi/eme_query?bnhm_id=EMEC1138427&one=T	EMEC	EMEC	PreservedSpecimen	EMEC1138427	Kipling Will, Frank Hsu, Riva Madan	1	adult	pin	6/11/2015	United States	Nevada	White Pine County	Great Basin Nat. Pk., Lehman Creek		2035		39.01139	-114.21222	WGS1984	10			Discoderus amoenus LeConte, 1863	Animalia	Arthropoda	Insecta	Coleoptera	Carabidae	Discoderus	amoenus		LeConte, 1863
urn:catalog:EMEC:EMEC:1138442		https://creativecommons.org/publicdomain/zero/1.0/	http://vertnet.org/resources/norms.html	http://essigdb.berkeley.edu/cgi/eme_query?bnhm_id=EMEC1138442&one=T	EMEC	EMEC	PreservedSpecimen	EMEC1138442	S.M. Clark, R.C. Mower	1	adult	pin	9/19/2005	United States	Nevada	Clark County		3530 ft	1076		35.46667	-114.91667	WGS1984				Discoderus amoenus LeConte, 1863	Animalia	Arthropoda	Insecta	Coleoptera	Carabidae	Discoderus	amoenus		LeConte, 1863
urn:catalog:EMEC:EMEC:1138443		https://creativecommons.org/publicdomain/zero/1.0/	http://vertnet.org/resources/norms.html	http://essigdb.berkeley.edu/cgi/eme_query?bnhm_id=EMEC1138443&one=T	EMEC	EMEC	PreservedSpecimen	EMEC1138443	S.M. Clark, R.C. Mower	1	adult	pin	9/19/2005	United States	Nevada	Clark County		3530 ft	1076		35.46667	-114.91667	WGS1984				Discoderus amoenus LeConte, 1863	Animalia	Arthropoda	Insecta	Coleoptera	Carabidae	Discoderus	amoenus		LeConte, 1863
urn:catalog:EMEC:EMEC:1138444	12/21/2016	https://creativecommons.org/publicdomain/zero/1.0/	http://vertnet.org/resources/norms.html	http://essigdb.berkeley.edu/cgi/eme_query?bnhm_id=EMEC1138444&one=T	EMEC	EMEC	PreservedSpecimen	EMEC1138444	A. K. Johnson	1	adult	pin	6/11/1975	United States	Nevada	Nye County	Nevada Testing Site, Rock Valley				36.69526	-116.17424	WGS1984	5000			Discoderus amoenus LeConte, 1863	Animalia	Arthropoda	Insecta	Coleoptera	Carabidae	Discoderus	amoenus		LeConte, 1863
urn:catalog:EMEC:EMEC:1138445	12/20/2016	https://creativecommons.org/publicdomain/zero/1.0/	http://vertnet.org/resources/norms.html	http://essigdb.berkeley.edu/cgi/eme_query?bnhm_id=EMEC1138445&one=T	EMEC	EMEC	PreservedSpecimen	EMEC1138445	J. T. Doyen, B. Manion	1	adult	pin	6/24/1968	United States	Nevada	White Pine County	Lehman Creek, 5 mi w Baker				39.00988	-114.20893	WGS1984	2000			Discoderus amoenus LeConte, 1863	Animalia	Arthropoda	Insecta	Coleoptera	Carabidae	Discoderus	amoenus		LeConte, 1863
urn:catalog:EMEC:EMEC:1138446	12/20/2016	https://creativecommons.org/publicdomain/zero/1.0/	http://vertnet.org/resources/norms.html	http://essigdb.berkeley.edu/cgi/eme_query?bnhm_id=EMEC1138446&one=T	EMEC	EMEC	PreservedSpecimen	EMEC1138446	J. T. Doyen, B. Manion	1	adult	pin	6/24/1968	United States	Nevada	White Pine County	Lehman Creek, 5 mi w Baker				39.00988	-114.20893	WGS1984	2000			Discoderus amoenus LeConte, 1863	Animalia	Arthropoda	Insecta	Coleoptera	Carabidae	Discoderus	amoenus		LeConte, 1863
urn:catalog:EMEC:EMEC:1138447	12/20/2016	https://creativecommons.org/publicdomain/zero/1.0/	http://vertnet.org/resources/norms.html	http://essigdb.berkeley.edu/cgi/eme_query?bnhm_id=EMEC1138447&one=T	EMEC	EMEC	PreservedSpecimen	EMEC1138447	J. Robertson	1	adult	pin	4/3/1968	United States	Nevada	Clark County	Las Vegas				36.20268	-115.2361	WGS1984	16409			Discoderus amoenus LeConte, 1863	Animalia	Arthropoda	Insecta	Coleoptera	Carabidae	Discoderus	amoenus		LeConte, 1863
urn:catalog:EMEC:EMEC:705858	12/20/2016	https://creativecommons.org/publicdomain/zero/1.0/	http://vertnet.org/resources/norms.html	http://essigdb.berkeley.edu/cgi/eme_query?bnhm_id=EMEC705858&one=T	EMEC	EMEC	PreservedSpecimen	EMEC705858	M. Horner	1	adult	pin	8/7/2007	United States	Nevada	White Pine County	Great Basin National Park				38.94512	-114.24082	WGS1984	40000			Discoderus amoenus LeConte, 1863	Animalia	Arthropoda	Insecta	Coleoptera	Carabidae	Discoderus	amoenus		LeConte, 1863
urn:catalog:EMEC:EMEC:705859	12/20/2016	https://creativecommons.org/publicdomain/zero/1.0/	http://vertnet.org/resources/norms.html	http://essigdb.berkeley.edu/cgi/eme_query?bnhm_id=EMEC705859&one=T	EMEC	EMEC	PreservedSpecimen	EMEC705859	M. Horner	1	adult	pin	7/25/2007	United States	Nevada	White Pine County	Great Basin National Park				38.94512	-114.24082	WGS1984	40000			Discoderus amoenus LeConte, 1863	Animalia	Arthropoda	Insecta	Coleoptera	Carabidae	Discoderus	amoenus		LeConte, 1863
urn:catalog:EMEC:EMEC:705860	12/20/2016	https://creativecommons.org/publicdomain/zero/1.0/	http://vertnet.org/resources/norms.html	http://essigdb.berkeley.edu/cgi/eme_query?bnhm_id=EMEC705860&one=T	EMEC	EMEC	PreservedSpecimen	EMEC705860	M. Horner	1	adult	pin	7/31/2007	United States	Nevada	White Pine County	Great Basin National Park				38.94512	-114.24082	WGS1984	40000			Discoderus amoenus LeConte, 1863	Animalia	Arthropoda	Insecta	Coleoptera	Carabidae	Discoderus	amoenus		LeConte, 1863
urn:catalog:CAS:ENT:8085308	12/20/2016	https://creativecommons.org/publicdomain/zero/1.0/	http://vertnet.org/resources/norms.html	http://essigdb.berkeley.edu/cgi/eme_query?bnhm_id=CASENT8085308&one=T	CAS	ENT	PreservedSpecimen	CASENT8085308	L. S. Slevin	1	adult	pin	5/31/1931	United States	Nevada	Washoe County	Verdi				39.51833	-119.98778	WGS1984	2000			Elaphropus anthrax (LeConte, 1852)	Animalia	Arthropoda	Insecta	Coleoptera	Carabidae	Elaphropus	anthrax		(LeConte, 1852)
urn:catalog:EMEC:EMEC:1139242	4/4/2016	https://creativecommons.org/publicdomain/zero/1.0/	http://vertnet.org/resources/norms.html	http://essigdb.berkeley.edu/cgi/eme_query?bnhm_id=EMEC1139242&one=T	EMEC	EMEC	PreservedSpecimen	EMEC1139242		1	adult	pin	8/22/1959	United States	Nevada	Nye County	Mercury				36.67345	-115.98915	WGS1984	1500			Elaphropus conjugens Notman, 1919	Animalia	Arthropoda	Insecta	Coleoptera	Carabidae	Elaphropus	conjugens		Notman, 1919
urn:catalog:EMEC:EMEC:1139243		https://creativecommons.org/publicdomain/zero/1.0/	http://vertnet.org/resources/norms.html	http://essigdb.berkeley.edu/cgi/eme_query?bnhm_id=EMEC1139243&one=T	EMEC	EMEC	PreservedSpecimen	EMEC1139243	S.M. Clark	1	adult	pin	9/20/2005	United States	Nevada	Clark County	Newberry Mountains, Grapevine Canyon	2360 ft	719.328		35.23333	-114.68333	unknown				Elaphropus conjugens Notman, 1919	Animalia	Arthropoda	Insecta	Coleoptera	Carabidae	Elaphropus	conjugens		Notman, 1919
urn:catalog:EMEC:EMEC:1139244		https://creativecommons.org/publicdomain/zero/1.0/	http://vertnet.org/resources/norms.html	http://essigdb.berkeley.edu/cgi/eme_query?bnhm_id=EMEC1139244&one=T	EMEC	EMEC	PreservedSpecimen	EMEC1139244	S.M. Clark	1	adult	pin	9/20/2005	United States	Nevada	Clark County	Newberry Mountains, Sacatone Canyon	2230 ft.	679.704		35.25	-114.68333	unknown				Elaphropus conjugens Notman, 1919	Animalia	Arthropoda	Insecta	Coleoptera	Carabidae	Elaphropus	conjugens		Notman, 1919
urn:catalog:EMEC:EMEC:1137616	4/5/2016	https://creativecommons.org/publicdomain/zero/1.0/	http://vertnet.org/resources/norms.html	http://essigdb.berkeley.edu/cgi/eme_query?bnhm_id=EMEC1137616&one=T	EMEC	EMEC	PreservedSpecimen	EMEC1137616	M. Brandley, A. Seago	1	adult	pin	9/18/2005	United States	Nevada	Eureka County	I-80W, exit 254 (Dunphy exit) 1.6mi east of bridge, Humboldt River		1408		40.7	-116.53333	unknown				Elaphropus dolosus (LeConte, 1848)	Animalia	Arthropoda	Insecta	Coleoptera	Carabidae	Elaphropus	dolosus		(LeConte, 1848)
urn:catalog:EMEC:EMEC:1137617	4/5/2016	https://creativecommons.org/publicdomain/zero/1.0/	http://vertnet.org/resources/norms.html	http://essigdb.berkeley.edu/cgi/eme_query?bnhm_id=EMEC1137617&one=T	EMEC	EMEC	PreservedSpecimen	EMEC1137617	M. Brandley, A. Seago	1	adult	pin	9/18/2005	United States	Nevada	Eureka County	I-80W, exit 254 (Dunphy exit) 1.6mi east of bridge, Humboldt River		1408		40.7	-116.53333	unknown				Elaphropus dolosus (LeConte, 1848)	Animalia	Arthropoda	Insecta	Coleoptera	Carabidae	Elaphropus	dolosus		(LeConte, 1848)
urn:catalog:CAS:ENT:8085309	12/20/2016	https://creativecommons.org/publicdomain/zero/1.0/	http://vertnet.org/resources/norms.html	http://essigdb.berkeley.edu/cgi/eme_query?bnhm_id=CASENT8085309&one=T	CAS	ENT	PreservedSpecimen	CASENT8085309	L.S. Slevin	1	adult	pin	8/23/1955	United States	Nevada	Clark County	Mesquite				36.80556	-114.06639	WGS1984	2000			Elaphropus dolosus (LeConte, 1848)	Animalia	Arthropoda	Insecta	Coleoptera	Carabidae	Elaphropus	dolosus		(LeConte, 1848)
urn:catalog:CAS:ENT:8085310	12/20/2016	https://creativecommons.org/publicdomain/zero/1.0/	http://vertnet.org/resources/norms.html	http://essigdb.berkeley.edu/cgi/eme_query?bnhm_id=CASENT8085310&one=T	CAS	ENT	PreservedSpecimen	CASENT8085310	L.S. Slevin	1	adult	pin	8/23/1955	United States	Nevada	Clark County	Mesquite				36.80556	-114.06639	WGS1984	2000			Elaphropus dolosus (LeConte, 1848)	Animalia	Arthropoda	Insecta	Coleoptera	Carabidae	Elaphropus	dolosus		(LeConte, 1848)
urn:catalog:CAS:ENT:8302834	4/5/2016	https://creativecommons.org/publicdomain/zero/1.0/	http://vertnet.org/resources/norms.html	http://essigdb.berkeley.edu/cgi/eme_query?bnhm_id=CASENT8302834&one=T	CAS	ENT	PreservedSpecimen	CASENT8302834	J.R. Logan	1	adult	pin	4/28/1967	United States	Nevada	Clark County	Lake Mead				36.17246	-114.42987	WGS1984	40790			Galerita lecontei Dejean, 1831	Animalia	Arthropoda	Insecta	Coleoptera	Carabidae	Galerita	lecontei		Dejean, 1831
urn:catalog:CAS:ENT:8085269	12/19/2016	https://creativecommons.org/publicdomain/zero/1.0/	http://vertnet.org/resources/norms.html	http://essigdb.berkeley.edu/cgi/eme_query?bnhm_id=CASENT8085269&one=T	CAS	ENT	PreservedSpecimen	CASENT8085269	W.L. Pratt	1	adult	pin	1995-10-03/1996-04-25	United States	Nevada	Clark County	Sheep Mountains, South of Mormon Pass				36.55	-115.08333	WGS1984				Harpalus ellipsis Leconte, 1847	Animalia	Arthropoda	Insecta	Coleoptera	Carabidae	Harpalus	ellipsis		Leconte, 1847
urn:catalog:CAS:ENT:8085270	12/19/2016	https://creativecommons.org/publicdomain/zero/1.0/	http://vertnet.org/resources/norms.html	http://essigdb.berkeley.edu/cgi/eme_query?bnhm_id=CASENT8085270&one=T	CAS	ENT	PreservedSpecimen	CASENT8085270	W.L. Pratt	1	adult	pin	1995-10-03/1996-04-25	United States	Nevada	Clark County	Sheep Mountains, South of Mormon Pass				36.55	-115.08333	WGS1984				Harpalus ellipsis Leconte, 1847	Animalia	Arthropoda	Insecta	Coleoptera	Carabidae	Harpalus	ellipsis		Leconte, 1847
urn:catalog:CAS:ENT:8085271	12/19/2016	https://creativecommons.org/publicdomain/zero/1.0/	http://vertnet.org/resources/norms.html	http://essigdb.berkeley.edu/cgi/eme_query?bnhm_id=CASENT8085271&one=T	CAS	ENT	PreservedSpecimen	CASENT8085271	W.L. Pratt	1	adult	pin	1995-10-03/1996-04-25	United States	Nevada	Clark County	Sheep Mountains, South of Mormon Pass				36.55	-115.08333	WGS1984				Harpalus ellipsis Leconte, 1847	Animalia	Arthropoda	Insecta	Coleoptera	Carabidae	Harpalus	ellipsis		Leconte, 1847
urn:catalog:CAS:ENT:8085272	12/22/2016	https://creativecommons.org/publicdomain/zero/1.0/	http://vertnet.org/resources/norms.html	http://essigdb.berkeley.edu/cgi/eme_query?bnhm_id=CASENT8085272&one=T	CAS	ENT	PreservedSpecimen	CASENT8085272	D. Thomas	1	adult	pin	3/18/1972	United States	Nevada	Clark County	Toiyabe National Forest				36.20996	-115.70557	WGS1984	34457			Harpalus ellipsis Leconte, 1847	Animalia	Arthropoda	Insecta	Coleoptera	Carabidae	Harpalus	ellipsis		Leconte, 1847
urn:catalog:EMEC:EMEC:1137711		https://creativecommons.org/publicdomain/zero/1.0/	http://vertnet.org/resources/norms.html	http://essigdb.berkeley.edu/cgi/eme_query?bnhm_id=EMEC1137711&one=T	EMEC	EMEC	PreservedSpecimen	EMEC1137711	Kipling Will	1	adult	pin	6/12/2009	United States	Nevada	Elko County	Ruby Mts.,1.3 km NW Harrison Pass		2173		40.3328	-115.5222	WGS1984	10			Harpalus fraternus LeConte, 1852	Animalia	Arthropoda	Insecta	Coleoptera	Carabidae	Harpalus	fraternus		LeConte, 1852
urn:catalog:EMEC:EMEC:1137712		https://creativecommons.org/publicdomain/zero/1.0/	http://vertnet.org/resources/norms.html	http://essigdb.berkeley.edu/cgi/eme_query?bnhm_id=EMEC1137712&one=T	EMEC	EMEC	PreservedSpecimen	EMEC1137712	Kipling Will	1	adult	pin	6/12/2009	United States	Nevada	Elko County	Ruby Mts.,1.3 km NW Harrison Pass		2173		40.3328	-115.5222	WGS1984	10			Harpalus fraternus LeConte, 1852	Animalia	Arthropoda	Insecta	Coleoptera	Carabidae	Harpalus	fraternus		LeConte, 1852
urn:catalog:EMEC:EMEC:1137713		https://creativecommons.org/publicdomain/zero/1.0/	http://vertnet.org/resources/norms.html	http://essigdb.berkeley.edu/cgi/eme_query?bnhm_id=EMEC1137713&one=T	EMEC	EMEC	PreservedSpecimen	EMEC1137713	Kipling Will	1	adult	pin	6/12/2009	United States	Nevada	Elko County	Ruby Mts.,1.3 km NW Harrison Pass		2173		40.3328	-115.5222	WGS1984	10			Harpalus fraternus LeConte, 1852	Animalia	Arthropoda	Insecta	Coleoptera	Carabidae	Harpalus	fraternus		LeConte, 1852
urn:catalog:EMEC:EMEC:1137714		https://creativecommons.org/publicdomain/zero/1.0/	http://vertnet.org/resources/norms.html	http://essigdb.berkeley.edu/cgi/eme_query?bnhm_id=EMEC1137714&one=T	EMEC	EMEC	PreservedSpecimen	EMEC1137714	Kipling Will	1	adult	pin	6/12/2009	United States	Nevada	Elko County	Ruby Mts.,1.3 km NW Harrison Pass		2173		40.3328	-115.5222	WGS1984	10			Harpalus fraternus LeConte, 1852	Animalia	Arthropoda	Insecta	Coleoptera	Carabidae	Harpalus	fraternus		LeConte, 1852
urn:catalog:EMEC:EMEC:1137715		https://creativecommons.org/publicdomain/zero/1.0/	http://vertnet.org/resources/norms.html	http://essigdb.berkeley.edu/cgi/eme_query?bnhm_id=EMEC1137715&one=T	EMEC	EMEC	PreservedSpecimen	EMEC1137715	Kipling Will	1	adult	pin	6/12/2009	United States	Nevada	Elko County	Ruby Mts.,1.3 km NW Harrison Pass		2173		40.3328	-115.5222	WGS1984	10			Harpalus fraternus LeConte, 1852	Animalia	Arthropoda	Insecta	Coleoptera	Carabidae	Harpalus	fraternus		LeConte, 1852
urn:catalog:EMEC:EMEC:1137716	2/14/2016	https://creativecommons.org/publicdomain/zero/1.0/	http://vertnet.org/resources/norms.html	http://essigdb.berkeley.edu/cgi/eme_query?bnhm_id=EMEC1137716&one=T	EMEC	EMEC	PreservedSpecimen	EMEC1137716	Kipling Will, Frank Hsu, Riva Madan	1	adult	pin	2015-06-11/2015-06-13	United States	Nevada	White Pine County	Great Basin National Park, Blue Canyon		2433		39.05361	-114.3025	WGS1984	10			Harpalus fraternus LeConte, 1852	Animalia	Arthropoda	Insecta	Coleoptera	Carabidae	Harpalus	fraternus		LeConte, 1852
urn:catalog:EMEC:EMEC:1137717	2/14/2016	https://creativecommons.org/publicdomain/zero/1.0/	http://vertnet.org/resources/norms.html	http://essigdb.berkeley.edu/cgi/eme_query?bnhm_id=EMEC1137717&one=T	EMEC	EMEC	PreservedSpecimen	EMEC1137717	Kipling Will, Frank Hsu, Riva Madan	1	adult	pin	2015-06-11/2015-06-13	United States	Nevada	White Pine County	Great Basin National Park, Blue Canyon		2433		39.05361	-114.3025	WGS1984	10			Harpalus fraternus LeConte, 1852	Animalia	Arthropoda	Insecta	Coleoptera	Carabidae	Harpalus	fraternus		LeConte, 1852
urn:catalog:EMEC:EMEC:1137718		https://creativecommons.org/publicdomain/zero/1.0/	http://vertnet.org/resources/norms.html	http://essigdb.berkeley.edu/cgi/eme_query?bnhm_id=EMEC1137718&one=T	EMEC	EMEC	PreservedSpecimen	EMEC1137718	Kipling Will, D. R. Maddison, John Sproul	1	adult	pin	6/16/2013	United States	Nevada	Elko County	Ruby Range, Lamoille Canyon		2606		40.6181	-115.3686	WGS1984	10			Harpalus fraternus LeConte, 1852	Animalia	Arthropoda	Insecta	Coleoptera	Carabidae	Harpalus	fraternus		LeConte, 1852
urn:catalog:EMEC:EMEC:1137719		https://creativecommons.org/publicdomain/zero/1.0/	http://vertnet.org/resources/norms.html	http://essigdb.berkeley.edu/cgi/eme_query?bnhm_id=EMEC1137719&one=T	EMEC	EMEC	PreservedSpecimen	EMEC1137719	Kipling Will, D. R. Maddison, John Sproul	1	adult	pin	6/16/2013	United States	Nevada	Elko County	Ruby Range, Lamoille Canyon		2606		40.6181	-115.3686	WGS1984	10			Harpalus fraternus LeConte, 1852	Animalia	Arthropoda	Insecta	Coleoptera	Carabidae	Harpalus	fraternus		LeConte, 1852
urn:catalog:EMEC:EMEC:1137720		https://creativecommons.org/publicdomain/zero/1.0/	http://vertnet.org/resources/norms.html	http://essigdb.berkeley.edu/cgi/eme_query?bnhm_id=EMEC1137720&one=T	EMEC	EMEC	PreservedSpecimen	EMEC1137720	Kipling Will, Rolf Aalbu	1	adult	pin	6/3/2012	United States	Nevada	Lander County	North Fork Big Creek		2267		39.3453	-117.1061	WGS1984	10			Harpalus fraternus LeConte, 1852	Animalia	Arthropoda	Insecta	Coleoptera	Carabidae	Harpalus	fraternus		LeConte, 1852
urn:catalog:EMEC:EMEC:1137721		https://creativecommons.org/publicdomain/zero/1.0/	http://vertnet.org/resources/norms.html	http://essigdb.berkeley.edu/cgi/eme_query?bnhm_id=EMEC1137721&one=T	EMEC	EMEC	PreservedSpecimen	EMEC1137721	Kipling Will, Rolf Aalbu	1	adult	pin	6/3/2012	United States	Nevada	Lander County	North Fork Big Creek		2267		39.3453	-117.1061	WGS1984	10			Harpalus fraternus LeConte, 1852	Animalia	Arthropoda	Insecta	Coleoptera	Carabidae	Harpalus	fraternus		LeConte, 1852
urn:catalog:EMEC:EMEC:1137722		https://creativecommons.org/publicdomain/zero/1.0/	http://vertnet.org/resources/norms.html	http://essigdb.berkeley.edu/cgi/eme_query?bnhm_id=EMEC1137722&one=T	EMEC	EMEC	PreservedSpecimen	EMEC1137722	Kipling Will, Rolf Aalbu	1	adult	pin	6/3/2012	United States	Nevada	Lander County	North Fork Big Creek		2267		39.3453	-117.1061	WGS1984	10			Harpalus fraternus LeConte, 1852	Animalia	Arthropoda	Insecta	Coleoptera	Carabidae	Harpalus	fraternus		LeConte, 1852
urn:catalog:EMEC:EMEC:1137723		https://creativecommons.org/publicdomain/zero/1.0/	http://vertnet.org/resources/norms.html	http://essigdb.berkeley.edu/cgi/eme_query?bnhm_id=EMEC1137723&one=T	EMEC	EMEC	PreservedSpecimen	EMEC1137723	Kipling Will, Rolf Aalbu	1	adult	pin	6/4/2012	United States	Nevada	Nye County	0.7km NNE Dobbin Summit		2560		38.945	-116.5122	WGS1984	10			Harpalus fraternus LeConte, 1852	Animalia	Arthropoda	Insecta	Coleoptera	Carabidae	Harpalus	fraternus		LeConte, 1852
urn:catalog:EMEC:EMEC:1137724		https://creativecommons.org/publicdomain/zero/1.0/	http://vertnet.org/resources/norms.html	http://essigdb.berkeley.edu/cgi/eme_query?bnhm_id=EMEC1137724&one=T	EMEC	EMEC	PreservedSpecimen	EMEC1137724	Kipling Will, Rolf Aalbu	1	adult	pin	6/4/2012	United States	Nevada	Nye County	0.7km NNE Dobbin Summit		2560		38.945	-116.5122	WGS1984	10			Harpalus fraternus LeConte, 1852	Animalia	Arthropoda	Insecta	Coleoptera	Carabidae	Harpalus	fraternus		LeConte, 1852
urn:catalog:EMEC:EMEC:1137725		https://creativecommons.org/publicdomain/zero/1.0/	http://vertnet.org/resources/norms.html	http://essigdb.berkeley.edu/cgi/eme_query?bnhm_id=EMEC1137725&one=T	EMEC	EMEC	PreservedSpecimen	EMEC1137725	Kipling Will, Rolf Aalbu	1	adult	pin	6/4/2012	United States	Nevada	Nye County	0.7km NNE Dobbin Summit		2560		38.945	-116.5122	WGS1984	10			Harpalus fraternus LeConte, 1852	Animalia	Arthropoda	Insecta	Coleoptera	Carabidae	Harpalus	fraternus		LeConte, 1852
urn:catalog:EMEC:EMEC:1137726		https://creativecommons.org/publicdomain/zero/1.0/	http://vertnet.org/resources/norms.html	http://essigdb.berkeley.edu/cgi/eme_query?bnhm_id=EMEC1137726&one=T	EMEC	EMEC	PreservedSpecimen	EMEC1137726	Kipling Will, Rolf Aalbu	1	adult	pin	6/4/2012	United States	Nevada	Nye County	0.7km NNE Dobbin Summit		2560		38.945	-116.5122	WGS1984	10			Harpalus fraternus LeConte, 1852	Animalia	Arthropoda	Insecta	Coleoptera	Carabidae	Harpalus	fraternus		LeConte, 1852
urn:catalog:EMEC:EMEC:1137727		https://creativecommons.org/publicdomain/zero/1.0/	http://vertnet.org/resources/norms.html	http://essigdb.berkeley.edu/cgi/eme_query?bnhm_id=EMEC1137727&one=T	EMEC	EMEC	PreservedSpecimen	EMEC1137727	Kipling Will, Rolf Aalbu	1	adult	pin	6/4/2012	United States	Nevada	Nye County	0.7km NNE Dobbin Summit		2560		38.945	-116.5122	WGS1984	10			Harpalus fraternus LeConte, 1852	Animalia	Arthropoda	Insecta	Coleoptera	Carabidae	Harpalus	fraternus		LeConte, 1852
urn:catalog:EMEC:EMEC:1137728		https://creativecommons.org/publicdomain/zero/1.0/	http://vertnet.org/resources/norms.html	http://essigdb.berkeley.edu/cgi/eme_query?bnhm_id=EMEC1137728&one=T	EMEC	EMEC	PreservedSpecimen	EMEC1137728	Kipling Will, Frank Hsu, Riva Madan	1	adult	pin	6/9/2015	United States	Nevada	Mineral County	Queen Canyon		2268		37.90194	-118.3525	WGS1984	10			Harpalus fraternus LeConte, 1852	Animalia	Arthropoda	Insecta	Coleoptera	Carabidae	Harpalus	fraternus		LeConte, 1852
urn:catalog:EMEC:EMEC:1137729	2/14/2016	https://creativecommons.org/publicdomain/zero/1.0/	http://vertnet.org/resources/norms.html	http://essigdb.berkeley.edu/cgi/eme_query?bnhm_id=EMEC1137729&one=T	EMEC	EMEC	PreservedSpecimen	EMEC1137729	Kipling Will, Frank Hsu, Riva Madan	1	adult	pin	6/10/2015	United States	Nevada	White Pine County	Great Basin National Park, Baker Lake Trail		2370		38.98194	-114.24361	WGS1984	10			Harpalus fraternus LeConte, 1852	Animalia	Arthropoda	Insecta	Coleoptera	Carabidae	Harpalus	fraternus		LeConte, 1852
urn:catalog:EMEC:EMEC:1137730		https://creativecommons.org/publicdomain/zero/1.0/	http://vertnet.org/resources/norms.html	http://essigdb.berkeley.edu/cgi/eme_query?bnhm_id=EMEC1137730&one=T	EMEC	EMEC	PreservedSpecimen	EMEC1137730	Kipling Will	1	adult	pin	6/14/2009	United States	Nevada	Elko County	Ruby Mts., Lamoille Canyon		2667		40.6033	-115.3778	WGS1984	10			Harpalus fraternus LeConte, 1852	Animalia	Arthropoda	Insecta	Coleoptera	Carabidae	Harpalus	fraternus		LeConte, 1852
urn:catalog:EMEC:EMEC:1137731	2/14/2016	https://creativecommons.org/publicdomain/zero/1.0/	http://vertnet.org/resources/norms.html	http://essigdb.berkeley.edu/cgi/eme_query?bnhm_id=EMEC1137731&one=T	EMEC	EMEC	PreservedSpecimen	EMEC1137731	Kipling Will, Frank Hsu, Riva Madan	1	adult	pin	6/12/2015	United States	Nevada	White Pine County	Great Basin National Park, Snake Creek		2163		38.91639	-114.18917	WGS1984	10			Harpalus fraternus LeConte, 1852	Animalia	Arthropoda	Insecta	Coleoptera	Carabidae	Harpalus	fraternus		LeConte, 1852
urn:catalog:EMEC:EMEC:1137732		https://creativecommons.org/publicdomain/zero/1.0/	http://vertnet.org/resources/norms.html	http://essigdb.berkeley.edu/cgi/eme_query?bnhm_id=EMEC1137732&one=T	EMEC	EMEC	PreservedSpecimen	EMEC1137732	Kipling Will	1	adult	pin	6/14/2009	United States	Nevada	Elko County	Ruby Mts., Lamoille Canyon		2496		40.6425	-115.3753	WGS1984	10			Harpalus fraternus LeConte, 1852	Animalia	Arthropoda	Insecta	Coleoptera	Carabidae	Harpalus	fraternus		LeConte, 1852
urn:catalog:EMEC:EMEC:208870	12/22/2016	https://creativecommons.org/publicdomain/zero/1.0/	http://vertnet.org/resources/norms.html	http://essigdb.berkeley.edu/cgi/eme_query?bnhm_id=EMEC208870&one=T	EMEC	EMEC	PreservedSpecimen	EMEC208870	A. K. Johnson	1	adult	pin	6/21/1974	United States	Nevada	Washoe County	NW Washoe Co. 1mi.West, 1 1/2 mi. South Coleman Ranch				41.95863	-119.81488	unknown				Harpalus fraternus LeConte, 1852	Animalia	Arthropoda	Insecta	Coleoptera	Carabidae	Harpalus	fraternus		LeConte, 1852
urn:catalog:EMEC:EMEC:208871	12/21/2016	https://creativecommons.org/publicdomain/zero/1.0/	http://vertnet.org/resources/norms.html	http://essigdb.berkeley.edu/cgi/eme_query?bnhm_id=EMEC208871&one=T	EMEC	EMEC	PreservedSpecimen	EMEC208871	J. Doyen	1	adult	pin	7/23/1976	United States	Nevada	White Pine County	Schell Creek Range, Success Summit				39.25502	-114.69542	WGS1984	500			Harpalus fraternus LeConte, 1852	Animalia	Arthropoda	Insecta	Coleoptera	Carabidae	Harpalus	fraternus		LeConte, 1852
urn:catalog:EMEC:EMEC:208872	12/21/2016	https://creativecommons.org/publicdomain/zero/1.0/	http://vertnet.org/resources/norms.html	http://essigdb.berkeley.edu/cgi/eme_query?bnhm_id=EMEC208872&one=T	EMEC	EMEC	PreservedSpecimen	EMEC208872	E.I. Schlinger	1	adult	pin	7/1/1954	United States	Nevada	Clark County	Willow Creek Camp, Charleston Mountains				36.41787	-115.76399	WGS1984	500			Harpalus fraternus LeConte, 1852	Animalia	Arthropoda	Insecta	Coleoptera	Carabidae	Harpalus	fraternus		LeConte, 1852
urn:catalog:EMEC:EMEC:208873	12/21/2016	https://creativecommons.org/publicdomain/zero/1.0/	http://vertnet.org/resources/norms.html	http://essigdb.berkeley.edu/cgi/eme_query?bnhm_id=EMEC208873&one=T	EMEC	EMEC	PreservedSpecimen	EMEC208873	G. R. Noonan, S.A. Rewolinski	1	adult	pin	7/29/1984	United States	Nevada	Elko County	Ruby Mountains	1899m	1899		40.4341	-115.47505	WGS1984	45359			Harpalus fraternus LeConte, 1852	Animalia	Arthropoda	Insecta	Coleoptera	Carabidae	Harpalus	fraternus		LeConte, 1852
urn:catalog:EMEC:EMEC:344093	12/20/2016	https://creativecommons.org/publicdomain/zero/1.0/	http://vertnet.org/resources/norms.html	http://essigdb.berkeley.edu/cgi/eme_query?bnhm_id=EMEC344093&one=T	EMEC	EMEC	PreservedSpecimen	EMEC344093	T. Ellis	1	adult	pin	7/23/2004	United States	Nevada	White Pine County	Great Basin National Park				38.94512	-114.24082	WGS1984	40000			Harpalus fraternus LeConte, 1852	Animalia	Arthropoda	Insecta	Coleoptera	Carabidae	Harpalus	fraternus		LeConte, 1852
urn:catalog:EMEC:EMEC:344094	12/20/2016	https://creativecommons.org/publicdomain/zero/1.0/	http://vertnet.org/resources/norms.html	http://essigdb.berkeley.edu/cgi/eme_query?bnhm_id=EMEC344094&one=T	EMEC	EMEC	PreservedSpecimen	EMEC344094	T. Ellis	1	adult	pin	7/7/2004	United States	Nevada	White Pine County	Great Basin National Park				38.94512	-114.24082	WGS1984	40000			Harpalus fraternus LeConte, 1852	Animalia	Arthropoda	Insecta	Coleoptera	Carabidae	Harpalus	fraternus		LeConte, 1852
urn:catalog:EMEC:EMEC:344095	12/20/2016	https://creativecommons.org/publicdomain/zero/1.0/	http://vertnet.org/resources/norms.html	http://essigdb.berkeley.edu/cgi/eme_query?bnhm_id=EMEC344095&one=T	EMEC	EMEC	PreservedSpecimen	EMEC344095	T. Ellis	1	adult	pin	7/23/2004	United States	Nevada	White Pine County	Great Basin National Park				38.94512	-114.24082	WGS1984	40000			Harpalus fraternus LeConte, 1852	Animalia	Arthropoda	Insecta	Coleoptera	Carabidae	Harpalus	fraternus		LeConte, 1852
urn:catalog:EMEC:EMEC:344096	12/20/2016	https://creativecommons.org/publicdomain/zero/1.0/	http://vertnet.org/resources/norms.html	http://essigdb.berkeley.edu/cgi/eme_query?bnhm_id=EMEC344096&one=T	EMEC	EMEC	PreservedSpecimen	EMEC344096	T. Ellis	1	adult	pin	7/30/2004	United States	Nevada	White Pine County	Great Basin National Park				38.94512	-114.24082	WGS1984	40000			Harpalus fraternus LeConte, 1852	Animalia	Arthropoda	Insecta	Coleoptera	Carabidae	Harpalus	fraternus		LeConte, 1852
urn:catalog:EMEC:EMEC:1137694	12/15/2016	https://creativecommons.org/publicdomain/zero/1.0/	http://vertnet.org/resources/norms.html	http://essigdb.berkeley.edu/cgi/eme_query?bnhm_id=EMEC1137694&one=T	EMEC	EMEC	PreservedSpecimen	EMEC1137694	Kipling Will, Frank Hsu, Riva Madan	1	adult	pin	6/10/2015	United States	Nevada	White Pine County	Great Basin National Park, Baker Lake Trail		2370		38.98194	-114.24361	WGS1984	10			Harpalus fuscipalpis Sturm, 1818	Animalia	Arthropoda	Insecta	Coleoptera	Carabidae	Harpalus	fuscipalpis		Sturm, 1818
urn:catalog:EMEC:EMEC:344041	12/21/2016	https://creativecommons.org/publicdomain/zero/1.0/	http://vertnet.org/resources/norms.html	http://essigdb.berkeley.edu/cgi/eme_query?bnhm_id=EMEC344041&one=T	EMEC	EMEC	PreservedSpecimen	EMEC344041	J. T. Doyen, B. Manion	1	adult	pin	6/22/1968	United States	Nevada	Lander County	Austin, , 16 miles south, Big Creek Campground				39.34548	-117.13683	WGS1984	1000			Harpalus fuscipalpis Sturm, 1818	Animalia	Arthropoda	Insecta	Coleoptera	Carabidae	Harpalus	fuscipalpis		Sturm, 1818
urn:catalog:EMEC:EMEC:344042	12/20/2016	https://creativecommons.org/publicdomain/zero/1.0/	http://vertnet.org/resources/norms.html	http://essigdb.berkeley.edu/cgi/eme_query?bnhm_id=EMEC344042&one=T	EMEC	EMEC	PreservedSpecimen	EMEC344042	P. A. Rude	1	adult	pin	6/11/1970	United States	Nevada	Washoe County	21 mi Southeast of Eagleville				41.09056	-119.91893	WGS1984	1642			Harpalus fuscipalpis Sturm, 1818	Animalia	Arthropoda	Insecta	Coleoptera	Carabidae	Harpalus	fuscipalpis		Sturm, 1818
urn:catalog:EMEC:EMEC:344043	12/20/2016	https://creativecommons.org/publicdomain/zero/1.0/	http://vertnet.org/resources/norms.html	http://essigdb.berkeley.edu/cgi/eme_query?bnhm_id=EMEC344043&one=T	EMEC	EMEC	PreservedSpecimen	EMEC344043	P. A. Rude	1	adult	pin	6/11/1970	United States	Nevada	Washoe County	21 mi Southeast of Eagleville				41.09056	-119.91893	WGS1984	1642			Harpalus fuscipalpis Sturm, 1818	Animalia	Arthropoda	Insecta	Coleoptera	Carabidae	Harpalus	fuscipalpis		Sturm, 1818
urn:catalog:EMEC:EMEC:344044	12/20/2016	https://creativecommons.org/publicdomain/zero/1.0/	http://vertnet.org/resources/norms.html	http://essigdb.berkeley.edu/cgi/eme_query?bnhm_id=EMEC344044&one=T	EMEC	EMEC	PreservedSpecimen	EMEC344044	P. A. Rude	1	adult	pin	6/11/1970	United States	Nevada	Washoe County	31 mi Northwest of Gerlach				41.09669	-119.3874	WGS1984	5000			Harpalus fuscipalpis Sturm, 1818	Animalia	Arthropoda	Insecta	Coleoptera	Carabidae	Harpalus	fuscipalpis		Sturm, 1818
urn:catalog:EMEC:EMEC:344045	12/21/2016	https://creativecommons.org/publicdomain/zero/1.0/	http://vertnet.org/resources/norms.html	http://essigdb.berkeley.edu/cgi/eme_query?bnhm_id=EMEC344045&one=T	EMEC	EMEC	PreservedSpecimen	EMEC344045	J. Hafernik, S. L. Szerlip	1	adult	pin	6/8/1973	United States	Nevada	Washoe County	3 mi South of Nixon along Truckee River	3800\'	1158		39.78953	-119.35057	WGS1984	500			Harpalus fuscipalpis Sturm, 1818	Animalia	Arthropoda	Insecta	Coleoptera	Carabidae	Harpalus	fuscipalpis		Sturm, 1818
urn:catalog:EMEC:EMEC:344046	12/21/2016	https://creativecommons.org/publicdomain/zero/1.0/	http://vertnet.org/resources/norms.html	http://essigdb.berkeley.edu/cgi/eme_query?bnhm_id=EMEC344046&one=T	EMEC	EMEC	PreservedSpecimen	EMEC344046	J. W. MacSwain	1	adult	pin	6/20/1958	United States	Nevada	Storey County	6mi. Northeast of Dayton				39.30106	-119.51691	WGS1984	200			Harpalus fuscipalpis Sturm, 1818	Animalia	Arthropoda	Insecta	Coleoptera	Carabidae	Harpalus	fuscipalpis		Sturm, 1818
urn:catalog:EMEC:EMEC:344047	12/22/2016	https://creativecommons.org/publicdomain/zero/1.0/	http://vertnet.org/resources/norms.html	http://essigdb.berkeley.edu/cgi/eme_query?bnhm_id=EMEC344047&one=T	EMEC	EMEC	PreservedSpecimen	EMEC344047	J. T. Doyen	1	adult	pin	8/6/1978	United States	Nevada	White Pine County	Snake Range, Snake Creek	6200\'	1890		38.91932	-114.12679	WGS1984	500			Harpalus fuscipalpis Sturm, 1818	Animalia	Arthropoda	Insecta	Coleoptera	Carabidae	Harpalus	fuscipalpis		Sturm, 1818
urn:catalog:EMEC:EMEC:344048	12/20/2016	https://creativecommons.org/publicdomain/zero/1.0/	http://vertnet.org/resources/norms.html	http://essigdb.berkeley.edu/cgi/eme_query?bnhm_id=EMEC344048&one=T	EMEC	EMEC	PreservedSpecimen	EMEC344048	R. E. Dietz	1	adult	pin	6/11/1970	United States	Nevada	Washoe County	21 mi Southeast of Eagleville				41.09056	-119.91893	WGS1984	1642			Harpalus fuscipalpis Sturm, 1818	Animalia	Arthropoda	Insecta	Coleoptera	Carabidae	Harpalus	fuscipalpis		Sturm, 1818
urn:catalog:CAS:ENT:8085267	12/21/2016	https://creativecommons.org/publicdomain/zero/1.0/	http://vertnet.org/resources/norms.html	http://essigdb.berkeley.edu/cgi/eme_query?bnhm_id=CASENT8085267&one=T	CAS	ENT	PreservedSpecimen	CASENT8085267		1	adult	pin	6/4/1969	United States	Nevada	Lander County					39.93381	-117.03791	WGS1984	14542			Harpalus fuscipalpis Sturm, 1818	Animalia	Arthropoda	Insecta	Coleoptera	Carabidae	Harpalus	fuscipalpis		Sturm, 1818
urn:catalog:CAS:ENT:8085268	12/21/2016	https://creativecommons.org/publicdomain/zero/1.0/	http://vertnet.org/resources/norms.html	http://essigdb.berkeley.edu/cgi/eme_query?bnhm_id=CASENT8085268&one=T	CAS	ENT	PreservedSpecimen	CASENT8085268	B.W.Miller Miller	1	adult	pin	6/4/1969	United States	Nevada	Lander County					39.93381	-117.03791	WGS1984	14542			Harpalus fuscipalpis Sturm, 1818	Animalia	Arthropoda	Insecta	Coleoptera	Carabidae	Harpalus	fuscipalpis		Sturm, 1818
urn:catalog:EMEC:EMEC:344050		https://creativecommons.org/publicdomain/zero/1.0/	http://vertnet.org/resources/norms.html	http://essigdb.berkeley.edu/cgi/eme_query?bnhm_id=EMEC344050&one=T	EMEC	EMEC	PreservedSpecimen	EMEC344050	Kipling Will, Frank Hsu, Riva Madan	1	adult	pin	6/12/2015	United States	Nevada	White Pine County	Great Basin Nat. Pk., Snake Creek		2163		38.91639	-114.18917	WGS1984	10			Harpalus opacipennis (Haldeman, 1843)	Animalia	Arthropoda	Insecta	Coleoptera	Carabidae	Harpalus	opacipennis		(Haldeman, 1843)
urn:catalog:EMEC:EMEC:344059		https://creativecommons.org/publicdomain/zero/1.0/	http://vertnet.org/resources/norms.html	http://essigdb.berkeley.edu/cgi/eme_query?bnhm_id=EMEC344059&one=T	EMEC	EMEC	PreservedSpecimen	EMEC344059	Kipling Will, Frank Hsu, Riva Madan	1	adult	pin	6/10/2015	United States	Nevada	White Pine County	Great Basin Nat. Pk., Baker Lake Trail		2370		38.98194	-114.24361	WGS1984	10			Harpalus opacipennis (Haldeman, 1843)	Animalia	Arthropoda	Insecta	Coleoptera	Carabidae	Harpalus	opacipennis		(Haldeman, 1843)
urn:catalog:EMEC:EMEC:344060		https://creativecommons.org/publicdomain/zero/1.0/	http://vertnet.org/resources/norms.html	http://essigdb.berkeley.edu/cgi/eme_query?bnhm_id=EMEC344060&one=T	EMEC	EMEC	PreservedSpecimen	EMEC344060	Kipling Will, Frank Hsu, Riva Madan	1	adult	pin	6/11/2015	United States	Nevada	White Pine County	Great Basin Nat. Pk., Grey Cliffs		2112		38.98972	-114.215	WGS1984	10			Harpalus opacipennis (Haldeman, 1843)	Animalia	Arthropoda	Insecta	Coleoptera	Carabidae	Harpalus	opacipennis		(Haldeman, 1843)
urn:catalog:EMEC:EMEC:344061		https://creativecommons.org/publicdomain/zero/1.0/	http://vertnet.org/resources/norms.html	http://essigdb.berkeley.edu/cgi/eme_query?bnhm_id=EMEC344061&one=T	EMEC	EMEC	PreservedSpecimen	EMEC344061	Kipling Will, Frank Hsu, Riva Madan	1	adult	pin	6/11/2015	United States	Nevada	White Pine County	Great Basin Nat. Pk., Grey Cliffs		2112		38.98972	-114.215	WGS1984	10			Harpalus opacipennis (Haldeman, 1843)	Animalia	Arthropoda	Insecta	Coleoptera	Carabidae	Harpalus	opacipennis		(Haldeman, 1843)
urn:catalog:EMEC:EMEC:344062		https://creativecommons.org/publicdomain/zero/1.0/	http://vertnet.org/resources/norms.html	http://essigdb.berkeley.edu/cgi/eme_query?bnhm_id=EMEC344062&one=T	EMEC	EMEC	PreservedSpecimen	EMEC344062	Kipling Will, Frank Hsu, Riva Madan	1	adult	pin	6/11/2015	United States	Nevada	White Pine County	Great Basin Nat. Pk., Grey Cliffs		2112		38.98972	-114.215	WGS1984	10			Harpalus opacipennis (Haldeman, 1843)	Animalia	Arthropoda	Insecta	Coleoptera	Carabidae	Harpalus	opacipennis		(Haldeman, 1843)
urn:catalog:EMEC:EMEC:344063		https://creativecommons.org/publicdomain/zero/1.0/	http://vertnet.org/resources/norms.html	http://essigdb.berkeley.edu/cgi/eme_query?bnhm_id=EMEC344063&one=T	EMEC	EMEC	PreservedSpecimen	EMEC344063	Kipling Will, Frank Hsu, Riva Madan	1	adult	pin	6/11/2015	United States	Nevada	White Pine County	Great Basin Nat. Pk., Grey Cliffs		2112		38.98972	-114.215	WGS1984	10			Harpalus opacipennis (Haldeman, 1843)	Animalia	Arthropoda	Insecta	Coleoptera	Carabidae	Harpalus	opacipennis		(Haldeman, 1843)
urn:catalog:EMEC:EMEC:344064		https://creativecommons.org/publicdomain/zero/1.0/	http://vertnet.org/resources/norms.html	http://essigdb.berkeley.edu/cgi/eme_query?bnhm_id=EMEC344064&one=T	EMEC	EMEC	PreservedSpecimen	EMEC344064	Kipling Will, Frank Hsu, Riva Madan	1	adult	pin	6/11/2015	United States	Nevada	White Pine County	Great Basin Nat. Pk., Grey Cliffs		2112		38.98972	-114.215	WGS1984	10			Harpalus opacipennis (Haldeman, 1843)	Animalia	Arthropoda	Insecta	Coleoptera	Carabidae	Harpalus	opacipennis		(Haldeman, 1843)
urn:catalog:EMEC:EMEC:344065		https://creativecommons.org/publicdomain/zero/1.0/	http://vertnet.org/resources/norms.html	http://essigdb.berkeley.edu/cgi/eme_query?bnhm_id=EMEC344065&one=T	EMEC	EMEC	PreservedSpecimen	EMEC344065	Kipling Will, Frank Hsu, Riva Madan	1	adult	pin	6/11/2015	United States	Nevada	White Pine County	Great Basin Nat. Pk., Lehman Creek		2035		39.01139	-114.21222	WGS1984	10			Harpalus opacipennis (Haldeman, 1843)	Animalia	Arthropoda	Insecta	Coleoptera	Carabidae	Harpalus	opacipennis		(Haldeman, 1843)
urn:catalog:EMEC:EMEC:344066		https://creativecommons.org/publicdomain/zero/1.0/	http://vertnet.org/resources/norms.html	http://essigdb.berkeley.edu/cgi/eme_query?bnhm_id=EMEC344066&one=T	EMEC	EMEC	PreservedSpecimen	EMEC344066	Kipling Will, Frank Hsu, Riva Madan	1	adult	pin	2015-06-11/2015-06-13	United States	Nevada	White Pine County	Great Basin Nat. Pk., Blue Canyon		2439		39.05361	-114.30194	WGS1984	10			Harpalus opacipennis (Haldeman, 1843)	Animalia	Arthropoda	Insecta	Coleoptera	Carabidae	Harpalus	opacipennis		(Haldeman, 1843)
urn:catalog:EMEC:EMEC:344067		https://creativecommons.org/publicdomain/zero/1.0/	http://vertnet.org/resources/norms.html	http://essigdb.berkeley.edu/cgi/eme_query?bnhm_id=EMEC344067&one=T	EMEC	EMEC	PreservedSpecimen	EMEC344067	Kipling Will, Frank Hsu, Riva Madan	1	adult	pin	2015-06-11/2015-06-13	United States	Nevada	White Pine County	Great Basin Nat. Pk., Blue Canyon		2439		39.05361	-114.30194	WGS1984	10			Harpalus opacipennis (Haldeman, 1843)	Animalia	Arthropoda	Insecta	Coleoptera	Carabidae	Harpalus	opacipennis		(Haldeman, 1843)
urn:catalog:EMEC:EMEC:344068		https://creativecommons.org/publicdomain/zero/1.0/	http://vertnet.org/resources/norms.html	http://essigdb.berkeley.edu/cgi/eme_query?bnhm_id=EMEC344068&one=T	EMEC	EMEC	PreservedSpecimen	EMEC344068	Kipling Will, Frank Hsu, Riva Madan	1	adult	pin	2015-06-11/2015-06-13	United States	Nevada	White Pine County	Great Basin Nat. Pk., Blue Canyon		2439		39.05361	-114.30194	WGS1984	10			Harpalus opacipennis (Haldeman, 1843)	Animalia	Arthropoda	Insecta	Coleoptera	Carabidae	Harpalus	opacipennis		(Haldeman, 1843)
urn:catalog:EMEC:EMEC:344051		https://creativecommons.org/publicdomain/zero/1.0/	http://vertnet.org/resources/norms.html	http://essigdb.berkeley.edu/cgi/eme_query?bnhm_id=EMEC344051&one=T	EMEC	EMEC	PreservedSpecimen	EMEC344051	Kipling Will, Frank Hsu, Riva Madan	1	adult	pin	6/12/2015	United States	Nevada	White Pine County	Great Basin Nat. Pk., Snake Creek		2163		38.91639	-114.18917	WGS1984	10			Harpalus opacipennis (Haldeman, 1843)	Animalia	Arthropoda	Insecta	Coleoptera	Carabidae	Harpalus	opacipennis		(Haldeman, 1843)
urn:catalog:EMEC:EMEC:344069		https://creativecommons.org/publicdomain/zero/1.0/	http://vertnet.org/resources/norms.html	http://essigdb.berkeley.edu/cgi/eme_query?bnhm_id=EMEC344069&one=T	EMEC	EMEC	PreservedSpecimen	EMEC344069	Kipling Will, Frank Hsu, Riva Madan	1	adult	pin	2015-06-11/2015-06-13	United States	Nevada	White Pine County	Great Basin Nat. Pk., Blue Canyon		2439		39.05361	-114.30194	WGS1984	10			Harpalus opacipennis (Haldeman, 1843)	Animalia	Arthropoda	Insecta	Coleoptera	Carabidae	Harpalus	opacipennis		(Haldeman, 1843)
urn:catalog:EMEC:EMEC:344070		https://creativecommons.org/publicdomain/zero/1.0/	http://vertnet.org/resources/norms.html	http://essigdb.berkeley.edu/cgi/eme_query?bnhm_id=EMEC344070&one=T	EMEC	EMEC	PreservedSpecimen	EMEC344070	Kipling Will, Frank Hsu, Riva Madan	1	adult	pin	2015-06-11/2015-06-13	United States	Nevada	White Pine County	Great Basin Nat. Pk., Blue Canyon		2439		39.05361	-114.30194	WGS1984	10			Harpalus opacipennis (Haldeman, 1843)	Animalia	Arthropoda	Insecta	Coleoptera	Carabidae	Harpalus	opacipennis		(Haldeman, 1843)
urn:catalog:EMEC:EMEC:344071		https://creativecommons.org/publicdomain/zero/1.0/	http://vertnet.org/resources/norms.html	http://essigdb.berkeley.edu/cgi/eme_query?bnhm_id=EMEC344071&one=T	EMEC	EMEC	PreservedSpecimen	EMEC344071	Kipling Will, Frank Hsu, Riva Madan	1	adult	pin	2015-06-11/2015-06-13	United States	Nevada	White Pine County	Great Basin Nat. Pk., Blue Canyon		2439		39.05361	-114.30194	WGS1984	10			Harpalus opacipennis (Haldeman, 1843)	Animalia	Arthropoda	Insecta	Coleoptera	Carabidae	Harpalus	opacipennis		(Haldeman, 1843)
urn:catalog:EMEC:EMEC:344072		https://creativecommons.org/publicdomain/zero/1.0/	http://vertnet.org/resources/norms.html	http://essigdb.berkeley.edu/cgi/eme_query?bnhm_id=EMEC344072&one=T	EMEC	EMEC	PreservedSpecimen	EMEC344072	Kipling Will, Frank Hsu, Riva Madan	1	adult	pin	2015-06-11/2015-06-13	United States	Nevada	White Pine County	Great Basin Nat. Pk., Blue Canyon		2439		39.05361	-114.30194	WGS1984	10			Harpalus opacipennis (Haldeman, 1843)	Animalia	Arthropoda	Insecta	Coleoptera	Carabidae	Harpalus	opacipennis		(Haldeman, 1843)
urn:catalog:EMEC:EMEC:344073		https://creativecommons.org/publicdomain/zero/1.0/	http://vertnet.org/resources/norms.html	http://essigdb.berkeley.edu/cgi/eme_query?bnhm_id=EMEC344073&one=T	EMEC	EMEC	PreservedSpecimen	EMEC344073	Kipling Will, Frank Hsu, Riva Madan	1	adult	pin	6/10/2015	United States	Nevada	White Pine County	Great Basin Nat. Pk., Baker Campground		2365		38.98306	-114.24361	WGS1984	10			Harpalus opacipennis (Haldeman, 1843)	Animalia	Arthropoda	Insecta	Coleoptera	Carabidae	Harpalus	opacipennis		(Haldeman, 1843)
urn:catalog:EMEC:EMEC:344074		https://creativecommons.org/publicdomain/zero/1.0/	http://vertnet.org/resources/norms.html	http://essigdb.berkeley.edu/cgi/eme_query?bnhm_id=EMEC344074&one=T	EMEC	EMEC	PreservedSpecimen	EMEC344074	Kipling Will, Frank Hsu, Riva Madan	1	adult	pin	6/13/2015	United States	Nevada	White Pine County	Great Basin Nat. Pk., Baker Campground		2354		38.98306	-114.24361	WGS1984	10			Harpalus opacipennis (Haldeman, 1843)	Animalia	Arthropoda	Insecta	Coleoptera	Carabidae	Harpalus	opacipennis		(Haldeman, 1843)
urn:catalog:EMEC:EMEC:344052		https://creativecommons.org/publicdomain/zero/1.0/	http://vertnet.org/resources/norms.html	http://essigdb.berkeley.edu/cgi/eme_query?bnhm_id=EMEC344052&one=T	EMEC	EMEC	PreservedSpecimen	EMEC344052	Kipling Will, Frank Hsu, Riva Madan	1	adult	pin	6/12/2015	United States	Nevada	White Pine County	Great Basin Nat. Pk., Snake Creek		2163		38.91639	-114.18917	WGS1984	10			Harpalus opacipennis (Haldeman, 1843)	Animalia	Arthropoda	Insecta	Coleoptera	Carabidae	Harpalus	opacipennis		(Haldeman, 1843)
urn:catalog:EMEC:EMEC:344053		https://creativecommons.org/publicdomain/zero/1.0/	http://vertnet.org/resources/norms.html	http://essigdb.berkeley.edu/cgi/eme_query?bnhm_id=EMEC344053&one=T	EMEC	EMEC	PreservedSpecimen	EMEC344053	Kipling Will, Frank Hsu, Riva Madan	1	adult	pin	6/12/2015	United States	Nevada	White Pine County	Great Basin Nat. Pk., Snake Creek		2163		38.91639	-114.18917	WGS1984	10			Harpalus opacipennis (Haldeman, 1843)	Animalia	Arthropoda	Insecta	Coleoptera	Carabidae	Harpalus	opacipennis		(Haldeman, 1843)
urn:catalog:EMEC:EMEC:344054		https://creativecommons.org/publicdomain/zero/1.0/	http://vertnet.org/resources/norms.html	http://essigdb.berkeley.edu/cgi/eme_query?bnhm_id=EMEC344054&one=T	EMEC	EMEC	PreservedSpecimen	EMEC344054	Kipling Will, Frank Hsu, Riva Madan	1	adult	pin	6/12/2015	United States	Nevada	White Pine County	Great Basin Nat. Pk., Snake Creek		2163		38.91639	-114.18917	WGS1984	10			Harpalus opacipennis (Haldeman, 1843)	Animalia	Arthropoda	Insecta	Coleoptera	Carabidae	Harpalus	opacipennis		(Haldeman, 1843)
urn:catalog:EMEC:EMEC:344055		https://creativecommons.org/publicdomain/zero/1.0/	http://vertnet.org/resources/norms.html	http://essigdb.berkeley.edu/cgi/eme_query?bnhm_id=EMEC344055&one=T	EMEC	EMEC	PreservedSpecimen	EMEC344055	Kipling Will, Frank Hsu, Riva Madan	1	adult	pin	6/12/2015	United States	Nevada	White Pine County	Great Basin Nat. Pk., Snake Creek		2163		38.91639	-114.18917	WGS1984	10			Harpalus opacipennis (Haldeman, 1843)	Animalia	Arthropoda	Insecta	Coleoptera	Carabidae	Harpalus	opacipennis		(Haldeman, 1843)
urn:catalog:EMEC:EMEC:344056		https://creativecommons.org/publicdomain/zero/1.0/	http://vertnet.org/resources/norms.html	http://essigdb.berkeley.edu/cgi/eme_query?bnhm_id=EMEC344056&one=T	EMEC	EMEC	PreservedSpecimen	EMEC344056	Kipling Will, Frank Hsu, Riva Madan	1	adult	pin	6/12/2015	United States	Nevada	White Pine County	Great Basin Nat. Pk., Snake Creek		2163		38.91639	-114.18917	WGS1984	10			Harpalus opacipennis (Haldeman, 1843)	Animalia	Arthropoda	Insecta	Coleoptera	Carabidae	Harpalus	opacipennis		(Haldeman, 1843)
urn:catalog:EMEC:EMEC:344057		https://creativecommons.org/publicdomain/zero/1.0/	http://vertnet.org/resources/norms.html	http://essigdb.berkeley.edu/cgi/eme_query?bnhm_id=EMEC344057&one=T	EMEC	EMEC	PreservedSpecimen	EMEC344057	Kipling Will, Frank Hsu, Riva Madan	1	adult	pin	6/10/2015	United States	Nevada	White Pine County	Great Basin Nat. Pk., Baker Lake Trail		2370		38.98194	-114.24361	WGS1984	10			Harpalus opacipennis (Haldeman, 1843)	Animalia	Arthropoda	Insecta	Coleoptera	Carabidae	Harpalus	opacipennis		(Haldeman, 1843)
urn:catalog:EMEC:EMEC:344058		https://creativecommons.org/publicdomain/zero/1.0/	http://vertnet.org/resources/norms.html	http://essigdb.berkeley.edu/cgi/eme_query?bnhm_id=EMEC344058&one=T	EMEC	EMEC	PreservedSpecimen	EMEC344058	Kipling Will, Frank Hsu, Riva Madan	1	adult	pin	6/10/2015	United States	Nevada	White Pine County	Great Basin Nat. Pk., Baker Lake Trail		2370		38.98194	-114.24361	WGS1984	10			Harpalus opacipennis (Haldeman, 1843)	Animalia	Arthropoda	Insecta	Coleoptera	Carabidae	Harpalus	opacipennis		(Haldeman, 1843)
urn:catalog:EMEC:EMEC:344075	12/21/2016	https://creativecommons.org/publicdomain/zero/1.0/	http://vertnet.org/resources/norms.html	http://essigdb.berkeley.edu/cgi/eme_query?bnhm_id=EMEC344075&one=T	EMEC	EMEC	PreservedSpecimen	EMEC344075	J. Doyen	1	adult	pin	7/12/1971	United States	Nevada	White Pine County	Mt. Wheeler	9000\'	2743.2		39.01719	-114.27943	WGS1984	1000			Harpalus opacipennis (Haldeman, 1843)	Animalia	Arthropoda	Insecta	Coleoptera	Carabidae	Harpalus	opacipennis		(Haldeman, 1843)
urn:catalog:CAS:ENT:8302835	4/5/2016	https://creativecommons.org/publicdomain/zero/1.0/	http://vertnet.org/resources/norms.html	http://essigdb.berkeley.edu/cgi/eme_query?bnhm_id=CASENT8302835&one=T	CAS	ENT	PreservedSpecimen	CASENT8302835	E. Smith	1	adult	pin	10/10/1974	United States	Nevada	Clark County					36.17228	-115.15243	WGS1984	140000			Laemostenus complanatus (Dejean, 1828)	Animalia	Arthropoda	Insecta	Coleoptera	Carabidae	Laemostenus	complanatus		(Dejean, 1828)
urn:catalog:CAS:ENT:8085311	12/22/2016	https://creativecommons.org/publicdomain/zero/1.0/	http://vertnet.org/resources/norms.html	http://essigdb.berkeley.edu/cgi/eme_query?bnhm_id=CASENT8085311&one=T	CAS	ENT	PreservedSpecimen	CASENT8085311	R. C. Bechtel, G. M. Nishida	1	adult	pin	9/6/1972	United States	Nevada	Lander County	Spencers Hot Springs				39.32687	-116.85981	WGS1984	1000			Lebia perita Casey, 1920	Animalia	Arthropoda	Insecta	Coleoptera	Carabidae	Lebia	perita		Casey, 1920
urn:catalog:CAS:ENT:8085312	12/21/2016	https://creativecommons.org/publicdomain/zero/1.0/	http://vertnet.org/resources/norms.html	http://essigdb.berkeley.edu/cgi/eme_query?bnhm_id=CASENT8085312&one=T	CAS	ENT	PreservedSpecimen	CASENT8085312	H.E. Gallaway	1	adult	pin	7/25/1956	United States	Nevada	Douglas County	Minden				38.95407	-119.76573	WGS1984	500			Lebia perita Casey, 1920	Animalia	Arthropoda	Insecta	Coleoptera	Carabidae	Lebia	perita		Casey, 1920
urn:catalog:CAS:ENT:8302836	4/5/2016	https://creativecommons.org/publicdomain/zero/1.0/	http://vertnet.org/resources/norms.html	http://essigdb.berkeley.edu/cgi/eme_query?bnhm_id=CASENT8302836&one=T	CAS	ENT	PreservedSpecimen	CASENT8302836	Miller	1	adult	pin	6/22/1970	United States	Nevada	Clark County	Paradise Valley				36.06011	-115.12087	WGS1984	4344			Notiobia terminata (Say, 1823)	Animalia	Arthropoda	Insecta	Coleoptera	Carabidae	Notiobia	terminata		(Say, 1823)
urn:catalog:EMEC:EMEC:1139235	4/5/2016	https://creativecommons.org/publicdomain/zero/1.0/	http://vertnet.org/resources/norms.html	http://essigdb.berkeley.edu/cgi/eme_query?bnhm_id=EMEC1139235&one=T	EMEC	EMEC	PreservedSpecimen	EMEC1139235	Baumann, Nelson, Wells	1	adult	pin	4/20/1987	United States	Nevada	Elko County	Lamoille Creek Power Plant Picnic area		1981		40.69138	-115.47622	WGS1984	100			Notiophilus nitens LeConte, 1857	Animalia	Arthropoda	Insecta	Coleoptera	Carabidae	Notiophilus	nitens		LeConte, 1857
urn:catalog:EMEC:EMEC:1137661		https://creativecommons.org/publicdomain/zero/1.0/	http://vertnet.org/resources/norms.html	http://essigdb.berkeley.edu/cgi/eme_query?bnhm_id=EMEC1137661&one=T	EMEC	EMEC	PreservedSpecimen	EMEC1137661	Kipling Will	1	adult	pin	6/13/2009	United States	Nevada	Elko County	Ruby Lake		1830		40.2242	-115.4742	WGS1984	10			Patrobus fossifrons (Eschscholtz, 1823)	Animalia	Arthropoda	Insecta	Coleoptera	Carabidae	Patrobus	fossifrons		(Eschscholtz, 1823)
urn:catalog:EMEC:EMEC:1137662		https://creativecommons.org/publicdomain/zero/1.0/	http://vertnet.org/resources/norms.html	http://essigdb.berkeley.edu/cgi/eme_query?bnhm_id=EMEC1137662&one=T	EMEC	EMEC	PreservedSpecimen	EMEC1137662	Kipling Will	1	adult	pin	6/13/2009	United States	Nevada	Elko County	Ruby Lake		1830		40.2242	-115.4742	WGS1984	10			Patrobus fossifrons (Eschscholtz, 1823)	Animalia	Arthropoda	Insecta	Coleoptera	Carabidae	Patrobus	fossifrons		(Eschscholtz, 1823)
urn:catalog:EMEC:EMEC:1137663		https://creativecommons.org/publicdomain/zero/1.0/	http://vertnet.org/resources/norms.html	http://essigdb.berkeley.edu/cgi/eme_query?bnhm_id=EMEC1137663&one=T	EMEC	EMEC	PreservedSpecimen	EMEC1137663	Kipling Will	1	adult	pin	6/13/2009	United States	Nevada	Elko County	Ruby Lake		1830		40.2242	-115.4742	WGS1984	10			Patrobus fossifrons (Eschscholtz, 1823)	Animalia	Arthropoda	Insecta	Coleoptera	Carabidae	Patrobus	fossifrons		(Eschscholtz, 1823)
urn:catalog:EMEC:EMEC:1137664		https://creativecommons.org/publicdomain/zero/1.0/	http://vertnet.org/resources/norms.html	http://essigdb.berkeley.edu/cgi/eme_query?bnhm_id=EMEC1137664&one=T	EMEC	EMEC	PreservedSpecimen	EMEC1137664	Kipling Will	1	adult	pin	6/13/2009	United States	Nevada	Elko County	Ruby Lake		1830		40.2242	-115.4742	WGS1984	10			Patrobus fossifrons (Eschscholtz, 1823)	Animalia	Arthropoda	Insecta	Coleoptera	Carabidae	Patrobus	fossifrons		(Eschscholtz, 1823)
urn:catalog:EMEC:EMEC:1137665		https://creativecommons.org/publicdomain/zero/1.0/	http://vertnet.org/resources/norms.html	http://essigdb.berkeley.edu/cgi/eme_query?bnhm_id=EMEC1137665&one=T	EMEC	EMEC	PreservedSpecimen	EMEC1137665	Kipling Will	1	adult	pin	6/13/2009	United States	Nevada	Elko County	Ruby Lake		1830		40.2242	-115.4742	WGS1984	10			Patrobus fossifrons (Eschscholtz, 1823)	Animalia	Arthropoda	Insecta	Coleoptera	Carabidae	Patrobus	fossifrons		(Eschscholtz, 1823)
urn:catalog:EMEC:EMEC:1137666		https://creativecommons.org/publicdomain/zero/1.0/	http://vertnet.org/resources/norms.html	http://essigdb.berkeley.edu/cgi/eme_query?bnhm_id=EMEC1137666&one=T	EMEC	EMEC	PreservedSpecimen	EMEC1137666	Kipling Will	1	adult	pin	6/13/2009	United States	Nevada	Elko County	Ruby Lake		1830		40.2242	-115.4742	WGS1984	10			Patrobus fossifrons (Eschscholtz, 1823)	Animalia	Arthropoda	Insecta	Coleoptera	Carabidae	Patrobus	fossifrons		(Eschscholtz, 1823)
urn:catalog:EMEC:EMEC:1139262	4/5/2016	https://creativecommons.org/publicdomain/zero/1.0/	http://vertnet.org/resources/norms.html	http://essigdb.berkeley.edu/cgi/eme_query?bnhm_id=EMEC1139262&one=T	EMEC	EMEC	PreservedSpecimen	EMEC1139262	Baumann, Whiting	1	adult	pin	5/16/1985	United States	Nevada	Lincoln County	Spring Valley Creek				38.04525	-114.17812	WGS1984	1000			Patrobus fossifrons (Eschscholtz, 1823)	Animalia	Arthropoda	Insecta	Coleoptera	Carabidae	Patrobus	fossifrons		(Eschscholtz, 1823)
urn:catalog:EMEC:EMEC:1139263	4/5/2016	https://creativecommons.org/publicdomain/zero/1.0/	http://vertnet.org/resources/norms.html	http://essigdb.berkeley.edu/cgi/eme_query?bnhm_id=EMEC1139263&one=T	EMEC	EMEC	PreservedSpecimen	EMEC1139263	Baumann, Whiting	1	adult	pin	5/16/1985	United States	Nevada	Lincoln County	Spring Valley Creek				38.04525	-114.17812	WGS1984	1000			Patrobus fossifrons (Eschscholtz, 1823)	Animalia	Arthropoda	Insecta	Coleoptera	Carabidae	Patrobus	fossifrons		(Eschscholtz, 1823)
urn:catalog:EMEC:EMEC:1139261	4/5/2016	https://creativecommons.org/publicdomain/zero/1.0/	http://vertnet.org/resources/norms.html	http://essigdb.berkeley.edu/cgi/eme_query?bnhm_id=EMEC1139261&one=T	EMEC	EMEC	PreservedSpecimen	EMEC1139261	Baumann, Whiting	1	adult	pin	5/16/1985	United States	Nevada	Lincoln County	Spring Valley Creek				38.04525	-114.17812	WGS1984	1000			Patrobus fossifrons (Eschscholtz, 1823)	Animalia	Arthropoda	Insecta	Coleoptera	Carabidae	Patrobus	fossifrons		(Eschscholtz, 1823)
urn:catalog:EMEC:EMEC:1139241	4/5/2016	https://creativecommons.org/publicdomain/zero/1.0/	http://vertnet.org/resources/norms.html	http://essigdb.berkeley.edu/cgi/eme_query?bnhm_id=EMEC1139241&one=T	EMEC	EMEC	PreservedSpecimen	EMEC1139241	Richard W. Baumann	1	adult	pin	4/19/2004	United States	Nevada	Humbolt County	Winnemucca				40.97679	-117.73931	WGS1984	3730			Polyderis rufotestacea (Hayward, 1900)	Animalia	Arthropoda	Insecta	Coleoptera	Carabidae	Polyderis	rufotestacea		(Hayward, 1900)
urn:catalog:EMEC:EMEC:1139259	4/5/2016	https://creativecommons.org/publicdomain/zero/1.0/	http://vertnet.org/resources/norms.html	http://essigdb.berkeley.edu/cgi/eme_query?bnhm_id=EMEC1139259&one=T	EMEC	EMEC	PreservedSpecimen	EMEC1139259	Baumann, Huillet	1	adult	pin	4/21/1997	United States	Nevada	Clark County	Muddy Spring, Moapa Valley				36.71667	-114.7	unknown				Pseudaptinus rufulus (LeConte, 1851)	Animalia	Arthropoda	Insecta	Coleoptera	Carabidae	Pseudaptinus	rufulus		(LeConte, 1851)
urn:catalog:CAS:ENT:8302837	4/5/2016	https://creativecommons.org/publicdomain/zero/1.0/	http://vertnet.org/resources/norms.html	http://essigdb.berkeley.edu/cgi/eme_query?bnhm_id=CASENT8302837&one=T	CAS	ENT	PreservedSpecimen	CASENT8302837	Danzineer	1	adult	pin	9/22/1973	United States	Nevada	Clark County	Las Vegas Wash				36.08943	-114.94761	WGS1984	3154			Pseudaptinus rufulus (LeConte, 1851)	Animalia	Arthropoda	Insecta	Coleoptera	Carabidae	Pseudaptinus	rufulus		(LeConte, 1851)
urn:catalog:EMEC:EMEC:1075366		https://creativecommons.org/publicdomain/zero/1.0/	http://vertnet.org/resources/norms.html	http://essigdb.berkeley.edu/cgi/eme_query?bnhm_id=EMEC1075366&one=T	EMEC	EMEC	PreservedSpecimen	EMEC1075366	Kipling Will, Frank Hsu, Riva Madan	1			6/13/2015	United States	Nevada	White Pine County	Great Basin Nat. Pk., Trail to Dead Lake		2790		38.92972	-114.27083	WGS1984	10			Psydrus piceus LeConte, 1846	Animalia	Arthropoda	Insecta	Coleoptera	Carabidae	Psydrus	piceus		LeConte, 1846
urn:catalog:EMEC:EMEC:344607		https://creativecommons.org/publicdomain/zero/1.0/	http://vertnet.org/resources/norms.html	http://essigdb.berkeley.edu/cgi/eme_query?bnhm_id=EMEC344607&one=T	EMEC	EMEC	PreservedSpecimen	EMEC344607	Kipling Will	1	adult	pin	6/13/2009	United States	Nevada	Elko County	Ruby Lake		1830		40.2242	-115.4742	WGS1984	10			Pterostichus luctuosus (Dejean, 1828)	Animalia	Arthropoda	Insecta	Coleoptera	Carabidae	Pterostichus	luctuosus		LeConte, 1846
urn:catalog:EMEC:EMEC:344608		https://creativecommons.org/publicdomain/zero/1.0/	http://vertnet.org/resources/norms.html	http://essigdb.berkeley.edu/cgi/eme_query?bnhm_id=EMEC344608&one=T	EMEC	EMEC	PreservedSpecimen	EMEC344608	Kipling Will	1	adult	pin	6/13/2009	United States	Nevada	Elko County	Ruby Lake		1830		40.2242	-115.4742	WGS1984	10			Pterostichus luctuosus (Dejean, 1828)	Animalia	Arthropoda	Insecta	Coleoptera	Carabidae	Pterostichus	luctuosus		(Dejean, 1828)
urn:catalog:EMEC:EMEC:344609		https://creativecommons.org/publicdomain/zero/1.0/	http://vertnet.org/resources/norms.html	http://essigdb.berkeley.edu/cgi/eme_query?bnhm_id=EMEC344609&one=T	EMEC	EMEC	PreservedSpecimen	EMEC344609	Kipling Will	1	adult	pin	6/13/2009	United States	Nevada	Elko County	Ruby Lake		1830		40.2242	-115.4742	WGS1984	10			Pterostichus luctuosus (Dejean, 1828)	Animalia	Arthropoda	Insecta	Coleoptera	Carabidae	Pterostichus	luctuosus		(Dejean, 1828)
urn:catalog:EMEC:EMEC:344610		https://creativecommons.org/publicdomain/zero/1.0/	http://vertnet.org/resources/norms.html	http://essigdb.berkeley.edu/cgi/eme_query?bnhm_id=EMEC344610&one=T	EMEC	EMEC	PreservedSpecimen	EMEC344610	Kipling Will	1	adult	pin	6/13/2009	United States	Nevada	Elko County	Ruby Lake		1830		40.2242	-115.4742	WGS1984	10			Pterostichus luctuosus (Dejean, 1828)	Animalia	Arthropoda	Insecta	Coleoptera	Carabidae	Pterostichus	luctuosus		(Dejean, 1828)
urn:catalog:EMEC:EMEC:344611		https://creativecommons.org/publicdomain/zero/1.0/	http://vertnet.org/resources/norms.html	http://essigdb.berkeley.edu/cgi/eme_query?bnhm_id=EMEC344611&one=T	EMEC	EMEC	PreservedSpecimen	EMEC344611	Kipling Will	1	adult	pin	6/13/2009	United States	Nevada	Elko County	Ruby Lake		1830		40.2242	-115.4742	WGS1984	10			Pterostichus luctuosus (Dejean, 1828)	Animalia	Arthropoda	Insecta	Coleoptera	Carabidae	Pterostichus	luctuosus		(Dejean, 1828)
urn:catalog:EMEC:EMEC:344612		https://creativecommons.org/publicdomain/zero/1.0/	http://vertnet.org/resources/norms.html	http://essigdb.berkeley.edu/cgi/eme_query?bnhm_id=EMEC344612&one=T	EMEC	EMEC	PreservedSpecimen	EMEC344612	Kipling Will	1	adult	pin	6/13/2009	United States	Nevada	Elko County	Ruby Lake		1830		40.2242	-115.4742	WGS1984	10			Pterostichus luctuosus (Dejean, 1828)	Animalia	Arthropoda	Insecta	Coleoptera	Carabidae	Pterostichus	luctuosus		(Dejean, 1828)
urn:catalog:EMEC:EMEC:344613		https://creativecommons.org/publicdomain/zero/1.0/	http://vertnet.org/resources/norms.html	http://essigdb.berkeley.edu/cgi/eme_query?bnhm_id=EMEC344613&one=T	EMEC	EMEC	PreservedSpecimen	EMEC344613	Kipling Will	1	adult	pin	6/13/2009	United States	Nevada	Elko County	Ruby Lake		1830		40.2242	-115.4742	WGS1984	10			Pterostichus luctuosus (Dejean, 1828)	Animalia	Arthropoda	Insecta	Coleoptera	Carabidae	Pterostichus	luctuosus		(Dejean, 1828)
urn:catalog:EMEC:EMEC:344614		https://creativecommons.org/publicdomain/zero/1.0/	http://vertnet.org/resources/norms.html	http://essigdb.berkeley.edu/cgi/eme_query?bnhm_id=EMEC344614&one=T	EMEC	EMEC	PreservedSpecimen	EMEC344614	Kipling Will	1	adult	pin	6/13/2009	United States	Nevada	Elko County	Ruby Lake		1830		40.2242	-115.4742	WGS1984	10			Pterostichus luctuosus (Dejean, 1828)	Animalia	Arthropoda	Insecta	Coleoptera	Carabidae	Pterostichus	luctuosus		(Dejean, 1828)
urn:catalog:EMEC:EMEC:344615		https://creativecommons.org/publicdomain/zero/1.0/	http://vertnet.org/resources/norms.html	http://essigdb.berkeley.edu/cgi/eme_query?bnhm_id=EMEC344615&one=T	EMEC	EMEC	PreservedSpecimen	EMEC344615	Kipling Will	1	adult	pin	6/13/2009	United States	Nevada	Elko County	Ruby Lake		1830		40.2242	-115.4742	WGS1984	10			Pterostichus luctuosus (Dejean, 1828)	Animalia	Arthropoda	Insecta	Coleoptera	Carabidae	Pterostichus	luctuosus		(Dejean, 1828)
urn:catalog:EMEC:EMEC:344606		https://creativecommons.org/publicdomain/zero/1.0/	http://vertnet.org/resources/norms.html	http://essigdb.berkeley.edu/cgi/eme_query?bnhm_id=EMEC344606&one=T	EMEC	EMEC	PreservedSpecimen	EMEC344606	Kipling Will	1	adult	pin	6/13/2009	United States	Nevada	Elko County	Ruby Lake		1830		40.2242	-115.4742	WGS1984	10			Pterostichus luctuosus (Dejean, 1828)	Animalia	Arthropoda	Insecta	Coleoptera	Carabidae	Pterostichus	luctuosus		(Dejean, 1828)
urn:catalog:EMEC:EMEC:344649	9/13/2015	https://creativecommons.org/publicdomain/zero/1.0/	http://vertnet.org/resources/norms.html	http://essigdb.berkeley.edu/cgi/eme_query?bnhm_id=EMEC344649&one=T	EMEC	EMEC	PreservedSpecimen	EMEC344649	Kipling Will	1	adult	pin	6/12/2009	United States	Nevada	Elko County	Ruby Mountains, 1.3 kilometers northwest of Harrison Pass		2173		40.3328	-115.5222	WGS1984	10			Pterostichus lustrans LeConte, 1851	Animalia	Arthropoda	Insecta	Coleoptera	Carabidae	Pterostichus	lustrans		LeConte, 1851
urn:catalog:EMEC:EMEC:344650	9/13/2015	https://creativecommons.org/publicdomain/zero/1.0/	http://vertnet.org/resources/norms.html	http://essigdb.berkeley.edu/cgi/eme_query?bnhm_id=EMEC344650&one=T	EMEC	EMEC	PreservedSpecimen	EMEC344650	Kipling Will	1	adult	pin	6/12/2009	United States	Nevada	Elko County	Ruby Mountains, 1.3 kilometers northwest of Harrison Pass		2173		40.3328	-115.5222	WGS1984	10			Pterostichus lustrans LeConte, 1851	Animalia	Arthropoda	Insecta	Coleoptera	Carabidae	Pterostichus	lustrans		LeConte, 1851
urn:catalog:EMEC:EMEC:344651	9/13/2015	https://creativecommons.org/publicdomain/zero/1.0/	http://vertnet.org/resources/norms.html	http://essigdb.berkeley.edu/cgi/eme_query?bnhm_id=EMEC344651&one=T	EMEC	EMEC	PreservedSpecimen	EMEC344651	Kipling Will	1	adult	pin	6/12/2009	United States	Nevada	Elko County	Ruby Mountains, 1.3 kilometers northwest of Harrison Pass		2173		40.3328	-115.5222	WGS1984	10			Pterostichus lustrans LeConte, 1851	Animalia	Arthropoda	Insecta	Coleoptera	Carabidae	Pterostichus	lustrans		LeConte, 1851
urn:catalog:EMEC:EMEC:344652	9/13/2015	https://creativecommons.org/publicdomain/zero/1.0/	http://vertnet.org/resources/norms.html	http://essigdb.berkeley.edu/cgi/eme_query?bnhm_id=EMEC344652&one=T	EMEC	EMEC	PreservedSpecimen	EMEC344652	Kipling Will	1	adult	pin	6/12/2009	United States	Nevada	Elko County	Ruby Mountains, 1.3 kilometers northwest of Harrison Pass		2173		40.3328	-115.5222	WGS1984	10			Pterostichus lustrans LeConte, 1851	Animalia	Arthropoda	Insecta	Coleoptera	Carabidae	Pterostichus	lustrans		LeConte, 1851
urn:catalog:EMEC:EMEC:344653	9/13/2015	https://creativecommons.org/publicdomain/zero/1.0/	http://vertnet.org/resources/norms.html	http://essigdb.berkeley.edu/cgi/eme_query?bnhm_id=EMEC344653&one=T	EMEC	EMEC	PreservedSpecimen	EMEC344653	Kipling Will	1	adult	pin	6/12/2009	United States	Nevada	Elko County	Ruby Mountains, 1.3 kilometers northwest of Harrison Pass		2173		40.3328	-115.5222	WGS1984	10			Pterostichus lustrans LeConte, 1851	Animalia	Arthropoda	Insecta	Coleoptera	Carabidae	Pterostichus	lustrans		LeConte, 1851
urn:catalog:EMEC:EMEC:344654	9/13/2015	https://creativecommons.org/publicdomain/zero/1.0/	http://vertnet.org/resources/norms.html	http://essigdb.berkeley.edu/cgi/eme_query?bnhm_id=EMEC344654&one=T	EMEC	EMEC	PreservedSpecimen	EMEC344654	Kipling Will	1	adult	pin	6/12/2009	United States	Nevada	Elko County	Ruby Mountains, 1.3 kilometers northwest of Harrison Pass		2173		40.3328	-115.5222	WGS1984	10			Pterostichus lustrans LeConte, 1851	Animalia	Arthropoda	Insecta	Coleoptera	Carabidae	Pterostichus	lustrans		LeConte, 1851
urn:catalog:EMEC:EMEC:344655		https://creativecommons.org/publicdomain/zero/1.0/	http://vertnet.org/resources/norms.html	http://essigdb.berkeley.edu/cgi/eme_query?bnhm_id=EMEC344655&one=T	EMEC	EMEC	PreservedSpecimen	EMEC344655	Kipling Will, Rolf Aalbu	1	adult	pin	6/4/2012	United States	Nevada	Lander County	Kingston Lake		2267		39.2397	-117.1639	WGS1984	10			Pterostichus lustrans LeConte, 1851	Animalia	Arthropoda	Insecta	Coleoptera	Carabidae	Pterostichus	lustrans		LeConte, 1851
urn:catalog:EMEC:EMEC:344656		https://creativecommons.org/publicdomain/zero/1.0/	http://vertnet.org/resources/norms.html	http://essigdb.berkeley.edu/cgi/eme_query?bnhm_id=EMEC344656&one=T	EMEC	EMEC	PreservedSpecimen	EMEC344656	Kipling Will, Rolf Aalbu	1	adult	pin	6/4/2012	United States	Nevada	Lander County	Kingston Lake		2267		39.2397	-117.1639	WGS1984	10			Pterostichus lustrans LeConte, 1851	Animalia	Arthropoda	Insecta	Coleoptera	Carabidae	Pterostichus	lustrans		LeConte, 1851
urn:catalog:EMEC:EMEC:344657		https://creativecommons.org/publicdomain/zero/1.0/	http://vertnet.org/resources/norms.html	http://essigdb.berkeley.edu/cgi/eme_query?bnhm_id=EMEC344657&one=T	EMEC	EMEC	PreservedSpecimen	EMEC344657	Kipling Will, Rolf Aalbu	1	adult	pin	6/4/2012	United States	Nevada	Lander County	Kingston Lake		2267		39.2397	-117.1639	WGS1984	10			Pterostichus lustrans LeConte, 1851	Animalia	Arthropoda	Insecta	Coleoptera	Carabidae	Pterostichus	lustrans		LeConte, 1851
urn:catalog:EMEC:EMEC:344658		https://creativecommons.org/publicdomain/zero/1.0/	http://vertnet.org/resources/norms.html	http://essigdb.berkeley.edu/cgi/eme_query?bnhm_id=EMEC344658&one=T	EMEC	EMEC	PreservedSpecimen	EMEC344658	Kipling Will, Rolf Aalbu	1	adult	pin	6/4/2012	United States	Nevada	Lander County	Kingston Lake		2267		39.2397	-117.1639	WGS1984	10			Pterostichus lustrans LeConte, 1851	Animalia	Arthropoda	Insecta	Coleoptera	Carabidae	Pterostichus	lustrans		LeConte, 1851
urn:catalog:EMEC:EMEC:344659		https://creativecommons.org/publicdomain/zero/1.0/	http://vertnet.org/resources/norms.html	http://essigdb.berkeley.edu/cgi/eme_query?bnhm_id=EMEC344659&one=T	EMEC	EMEC	PreservedSpecimen	EMEC344659	Kipling Will, Rolf Aalbu	1	adult	pin	6/4/2012	United States	Nevada	Lander County	Kingston Lake		2267		39.2397	-117.1639	WGS1984	10			Pterostichus lustrans LeConte, 1851	Animalia	Arthropoda	Insecta	Coleoptera	Carabidae	Pterostichus	lustrans		LeConte, 1851
urn:catalog:EMEC:EMEC:344660		https://creativecommons.org/publicdomain/zero/1.0/	http://vertnet.org/resources/norms.html	http://essigdb.berkeley.edu/cgi/eme_query?bnhm_id=EMEC344660&one=T	EMEC	EMEC	PreservedSpecimen	EMEC344660	Kipling Will, Rolf Aalbu	1	adult	pin	6/4/2012	United States	Nevada	Lander County	Kingston Lake		2267		39.2397	-117.1639	WGS1984	10			Pterostichus lustrans LeConte, 1851	Animalia	Arthropoda	Insecta	Coleoptera	Carabidae	Pterostichus	lustrans		LeConte, 1851
urn:catalog:EMEC:EMEC:344661		https://creativecommons.org/publicdomain/zero/1.0/	http://vertnet.org/resources/norms.html	http://essigdb.berkeley.edu/cgi/eme_query?bnhm_id=EMEC344661&one=T	EMEC	EMEC	PreservedSpecimen	EMEC344661	Kipling Will, Rolf Aalbu	1	adult	pin	6/4/2012	United States	Nevada	Lander County	Kingston Lake		2267		39.2397	-117.1639	WGS1984	10			Pterostichus lustrans LeConte, 1851	Animalia	Arthropoda	Insecta	Coleoptera	Carabidae	Pterostichus	lustrans		LeConte, 1851
urn:catalog:EMEC:EMEC:344662	2/14/2016	https://creativecommons.org/publicdomain/zero/1.0/	http://vertnet.org/resources/norms.html	http://essigdb.berkeley.edu/cgi/eme_query?bnhm_id=EMEC344662&one=T	EMEC	EMEC	PreservedSpecimen	EMEC344662	Kipling Will, Frank Hsu, Riva Madan	1	adult	pin	6/12/2015	United States	Nevada	White Pine County	Great Basin National Park, Snake Creek		2163		38.91639	-114.18917	WGS1984	10			Pterostichus lustrans LeConte, 1851	Animalia	Arthropoda	Insecta	Coleoptera	Carabidae	Pterostichus	lustrans		LeConte, 1851
urn:catalog:EMEC:EMEC:344663	2/14/2016	https://creativecommons.org/publicdomain/zero/1.0/	http://vertnet.org/resources/norms.html	http://essigdb.berkeley.edu/cgi/eme_query?bnhm_id=EMEC344663&one=T	EMEC	EMEC	PreservedSpecimen	EMEC344663	Kipling Will, Frank Hsu, Riva Madan	1	adult	pin	6/12/2015	United States	Nevada	White Pine County	Great Basin National Park, Snake Creek		2163		38.91639	-114.18917	WGS1984	10			Pterostichus lustrans LeConte, 1851	Animalia	Arthropoda	Insecta	Coleoptera	Carabidae	Pterostichus	lustrans		LeConte, 1851
urn:catalog:EMEC:EMEC:344664	2/14/2016	https://creativecommons.org/publicdomain/zero/1.0/	http://vertnet.org/resources/norms.html	http://essigdb.berkeley.edu/cgi/eme_query?bnhm_id=EMEC344664&one=T	EMEC	EMEC	PreservedSpecimen	EMEC344664	Kipling Will, Frank Hsu, Riva Madan	1	adult	pin	6/12/2015	United States	Nevada	White Pine County	Great Basin National Park, Snake Creek		2163		38.91639	-114.18917	WGS1984	10			Pterostichus lustrans LeConte, 1851	Animalia	Arthropoda	Insecta	Coleoptera	Carabidae	Pterostichus	lustrans		LeConte, 1851
urn:catalog:EMEC:EMEC:344665	2/14/2016	https://creativecommons.org/publicdomain/zero/1.0/	http://vertnet.org/resources/norms.html	http://essigdb.berkeley.edu/cgi/eme_query?bnhm_id=EMEC344665&one=T	EMEC	EMEC	PreservedSpecimen	EMEC344665	Kipling Will, Frank Hsu, Riva Madan	1	adult	pin	6/11/2015	United States	Nevada	White Pine County	Great Basin National Park, Grey Cliffs		2112		38.98972	-114.215	WGS1984	10			Pterostichus lustrans LeConte, 1851	Animalia	Arthropoda	Insecta	Coleoptera	Carabidae	Pterostichus	lustrans		LeConte, 1851
urn:catalog:EMEC:EMEC:344666	2/14/2016	https://creativecommons.org/publicdomain/zero/1.0/	http://vertnet.org/resources/norms.html	http://essigdb.berkeley.edu/cgi/eme_query?bnhm_id=EMEC344666&one=T	EMEC	EMEC	PreservedSpecimen	EMEC344666	Kipling Will, Frank Hsu, Riva Madan	1	adult	pin	6/11/2015	United States	Nevada	White Pine County	Great Basin National Park, Lehman Creek		2035		39.01139	-114.21222	WGS1984	10			Pterostichus lustrans LeConte, 1851	Animalia	Arthropoda	Insecta	Coleoptera	Carabidae	Pterostichus	lustrans		LeConte, 1851
urn:catalog:EMEC:EMEC:344667	2/14/2016	https://creativecommons.org/publicdomain/zero/1.0/	http://vertnet.org/resources/norms.html	http://essigdb.berkeley.edu/cgi/eme_query?bnhm_id=EMEC344667&one=T	EMEC	EMEC	PreservedSpecimen	EMEC344667	Kipling Will, Frank Hsu, Riva Madan	1	adult	pin	6/11/2015	United States	Nevada	White Pine County	Great Basin National Park, Lehman Creek		2035		39.01139	-114.21222	WGS1984	10			Pterostichus lustrans LeConte, 1851	Animalia	Arthropoda	Insecta	Coleoptera	Carabidae	Pterostichus	lustrans		LeConte, 1851
urn:catalog:EMEC:EMEC:344668	2/14/2016	https://creativecommons.org/publicdomain/zero/1.0/	http://vertnet.org/resources/norms.html	http://essigdb.berkeley.edu/cgi/eme_query?bnhm_id=EMEC344668&one=T	EMEC	EMEC	PreservedSpecimen	EMEC344668	Kipling Will, Frank Hsu, Riva Madan	1	adult	pin	6/11/2015	United States	Nevada	White Pine County	Great Basin National Park, Lehman Creek		2035		39.01139	-114.21222	WGS1984	10			Pterostichus lustrans LeConte, 1851	Animalia	Arthropoda	Insecta	Coleoptera	Carabidae	Pterostichus	lustrans		LeConte, 1851
urn:catalog:EMEC:EMEC:344669	2/14/2016	https://creativecommons.org/publicdomain/zero/1.0/	http://vertnet.org/resources/norms.html	http://essigdb.berkeley.edu/cgi/eme_query?bnhm_id=EMEC344669&one=T	EMEC	EMEC	PreservedSpecimen	EMEC344669	Kipling Will, Frank Hsu, Riva Madan	1	adult	pin	6/10/2015	United States	Nevada	White Pine County	Great Basin National Park, Baker Lake Trail		2370		38.98194	-114.24361	WGS1984	10			Pterostichus lustrans LeConte, 1851	Animalia	Arthropoda	Insecta	Coleoptera	Carabidae	Pterostichus	lustrans		LeConte, 1851
urn:catalog:EMEC:EMEC:344670	2/14/2016	https://creativecommons.org/publicdomain/zero/1.0/	http://vertnet.org/resources/norms.html	http://essigdb.berkeley.edu/cgi/eme_query?bnhm_id=EMEC344670&one=T	EMEC	EMEC	PreservedSpecimen	EMEC344670	Kipling Will, Frank Hsu, Riva Madan	1	adult	pin	6/10/2015	United States	Nevada	White Pine County	Great Basin National Park, Baker Lake Trail		2370		38.98194	-114.24361	WGS1984	10			Pterostichus lustrans LeConte, 1851	Animalia	Arthropoda	Insecta	Coleoptera	Carabidae	Pterostichus	lustrans		LeConte, 1851
urn:catalog:EMEC:EMEC:344671	2/14/2016	https://creativecommons.org/publicdomain/zero/1.0/	http://vertnet.org/resources/norms.html	http://essigdb.berkeley.edu/cgi/eme_query?bnhm_id=EMEC344671&one=T	EMEC	EMEC	PreservedSpecimen	EMEC344671	Kipling Will, Frank Hsu, Riva Madan	1	adult	pin	6/10/2015	United States	Nevada	White Pine County	Great Basin National Park, Baker Lake Trail		2370		38.98194	-114.24361	WGS1984	10			Pterostichus lustrans LeConte, 1851	Animalia	Arthropoda	Insecta	Coleoptera	Carabidae	Pterostichus	lustrans		LeConte, 1851
urn:catalog:EMEC:EMEC:344672	2/14/2016	https://creativecommons.org/publicdomain/zero/1.0/	http://vertnet.org/resources/norms.html	http://essigdb.berkeley.edu/cgi/eme_query?bnhm_id=EMEC344672&one=T	EMEC	EMEC	PreservedSpecimen	EMEC344672	Kipling Will, Frank Hsu, Riva Madan	1	adult	pin	6/10/2015	United States	Nevada	White Pine County	Great Basin National Park, Baker Lake Trail		2370		38.98194	-114.24361	WGS1984	10			Pterostichus lustrans LeConte, 1851	Animalia	Arthropoda	Insecta	Coleoptera	Carabidae	Pterostichus	lustrans		LeConte, 1851
urn:catalog:EMEC:EMEC:344673	2/14/2016	https://creativecommons.org/publicdomain/zero/1.0/	http://vertnet.org/resources/norms.html	http://essigdb.berkeley.edu/cgi/eme_query?bnhm_id=EMEC344673&one=T	EMEC	EMEC	PreservedSpecimen	EMEC344673	Kipling Will, Frank Hsu, Riva Madan	1	adult	pin	6/10/2015	United States	Nevada	White Pine County	Great Basin National Park, Baker Lake Trail		2370		38.98194	-114.24361	WGS1984	10			Pterostichus lustrans LeConte, 1851	Animalia	Arthropoda	Insecta	Coleoptera	Carabidae	Pterostichus	lustrans		LeConte, 1851
urn:catalog:EMEC:EMEC:344442	9/13/2015	https://creativecommons.org/publicdomain/zero/1.0/	http://vertnet.org/resources/norms.html	http://essigdb.berkeley.edu/cgi/eme_query?bnhm_id=EMEC344442&one=T	EMEC	EMEC	PreservedSpecimen	EMEC344442	Kipling Will	1	adult	pin	6/14/2009	United States	Nevada	Elko County	Ruby Mountains, Lamoille Canyon		2496		40.6425	-115.3753	WGS1984	10			Pterostichus protractus LeConte, 1860	Animalia	Arthropoda	Insecta	Coleoptera	Carabidae	Pterostichus	protractus		LeConte, 1860
urn:catalog:EMEC:EMEC:344451	9/13/2015	https://creativecommons.org/publicdomain/zero/1.0/	http://vertnet.org/resources/norms.html	http://essigdb.berkeley.edu/cgi/eme_query?bnhm_id=EMEC344451&one=T	EMEC	EMEC	PreservedSpecimen	EMEC344451	Kipling Will	1	adult	pin	6/14/2009	United States	Nevada	Elko County	Ruby Mountains, Lamoille Canyon		2496		40.6425	-115.3753	WGS1984	10			Pterostichus protractus LeConte, 1860	Animalia	Arthropoda	Insecta	Coleoptera	Carabidae	Pterostichus	protractus		LeConte, 1860
urn:catalog:EMEC:EMEC:344541		https://creativecommons.org/publicdomain/zero/1.0/	http://vertnet.org/resources/norms.html	http://essigdb.berkeley.edu/cgi/eme_query?bnhm_id=EMEC344541&one=T	EMEC	EMEC	PreservedSpecimen	EMEC344541	Kipling Will, Rolf Aalbu	1	adult	pin	6/4/2012	United States	Nevada	Lander County	North Fork Big Creek		2335		39.3583	-117.0953	WGS1984	10			Pterostichus protractus LeConte, 1860	Animalia	Arthropoda	Insecta	Coleoptera	Carabidae	Pterostichus	protractus		LeConte, 1860
urn:catalog:EMEC:EMEC:344542	2/14/2016	https://creativecommons.org/publicdomain/zero/1.0/	http://vertnet.org/resources/norms.html	http://essigdb.berkeley.edu/cgi/eme_query?bnhm_id=EMEC344542&one=T	EMEC	EMEC	PreservedSpecimen	EMEC344542	Kipling Will, Frank Hsu, Riva Madan	1	adult	pin	6/13/2015	United States	Nevada	White Pine County	Great Basin National Park, Dead Lake		2904		38.93556	-114.27417	WGS1984	10			Pterostichus protractus LeConte, 1860	Animalia	Arthropoda	Insecta	Coleoptera	Carabidae	Pterostichus	protractus		LeConte, 1860
urn:catalog:EMEC:EMEC:344543	2/14/2016	https://creativecommons.org/publicdomain/zero/1.0/	http://vertnet.org/resources/norms.html	http://essigdb.berkeley.edu/cgi/eme_query?bnhm_id=EMEC344543&one=T	EMEC	EMEC	PreservedSpecimen	EMEC344543	Kipling Will, Frank Hsu, Riva Madan	1	adult	pin	6/13/2015	United States	Nevada	White Pine County	Great Basin National Park, Dead Lake		2904		38.93556	-114.27417	WGS1984	10			Pterostichus protractus LeConte, 1860	Animalia	Arthropoda	Insecta	Coleoptera	Carabidae	Pterostichus	protractus		LeConte, 1860
urn:catalog:EMEC:EMEC:344544	2/14/2016	https://creativecommons.org/publicdomain/zero/1.0/	http://vertnet.org/resources/norms.html	http://essigdb.berkeley.edu/cgi/eme_query?bnhm_id=EMEC344544&one=T	EMEC	EMEC	PreservedSpecimen	EMEC344544	Kipling Will, Frank Hsu, Riva Madan	1	adult	pin	6/13/2015	United States	Nevada	White Pine County	Great Basin National Park, Dead Lake		2904		38.93556	-114.27417	WGS1984	10			Pterostichus protractus LeConte, 1860	Animalia	Arthropoda	Insecta	Coleoptera	Carabidae	Pterostichus	protractus		LeConte, 1860
urn:catalog:EMEC:EMEC:344545	2/14/2016	https://creativecommons.org/publicdomain/zero/1.0/	http://vertnet.org/resources/norms.html	http://essigdb.berkeley.edu/cgi/eme_query?bnhm_id=EMEC344545&one=T	EMEC	EMEC	PreservedSpecimen	EMEC344545	Kipling Will, Frank Hsu, Riva Madan	1	adult	pin	6/13/2015	United States	Nevada	White Pine County	Great Basin National Park, Dead Lake		2904		38.93556	-114.27417	WGS1984	10			Pterostichus protractus LeConte, 1860	Animalia	Arthropoda	Insecta	Coleoptera	Carabidae	Pterostichus	protractus		LeConte, 1860
urn:catalog:EMEC:EMEC:344546	2/14/2016	https://creativecommons.org/publicdomain/zero/1.0/	http://vertnet.org/resources/norms.html	http://essigdb.berkeley.edu/cgi/eme_query?bnhm_id=EMEC344546&one=T	EMEC	EMEC	PreservedSpecimen	EMEC344546	Kipling Will, Frank Hsu, Riva Madan	1	adult	pin	6/13/2015	United States	Nevada	White Pine County	Great Basin National Park, Dead Lake		2904		38.93556	-114.27417	WGS1984	10			Pterostichus protractus LeConte, 1860	Animalia	Arthropoda	Insecta	Coleoptera	Carabidae	Pterostichus	protractus		LeConte, 1860
urn:catalog:EMEC:EMEC:344547	2/14/2016	https://creativecommons.org/publicdomain/zero/1.0/	http://vertnet.org/resources/norms.html	http://essigdb.berkeley.edu/cgi/eme_query?bnhm_id=EMEC344547&one=T	EMEC	EMEC	PreservedSpecimen	EMEC344547	Kipling Will, Frank Hsu, Riva Madan	1	adult	pin	6/13/2015	United States	Nevada	White Pine County	Great Basin National Park, Dead Lake		2904		38.93556	-114.27417	WGS1984	10			Pterostichus protractus LeConte, 1860	Animalia	Arthropoda	Insecta	Coleoptera	Carabidae	Pterostichus	protractus		LeConte, 1860
urn:catalog:EMEC:EMEC:344548	2/14/2016	https://creativecommons.org/publicdomain/zero/1.0/	http://vertnet.org/resources/norms.html	http://essigdb.berkeley.edu/cgi/eme_query?bnhm_id=EMEC344548&one=T	EMEC	EMEC	PreservedSpecimen	EMEC344548	Kipling Will, Frank Hsu, Riva Madan	1	adult	pin	6/13/2015	United States	Nevada	White Pine County	Great Basin National Park, Dead Lake		2904		38.93556	-114.27417	WGS1984	10			Pterostichus protractus LeConte, 1860	Animalia	Arthropoda	Insecta	Coleoptera	Carabidae	Pterostichus	protractus		LeConte, 1860
urn:catalog:EMEC:EMEC:344549	2/14/2016	https://creativecommons.org/publicdomain/zero/1.0/	http://vertnet.org/resources/norms.html	http://essigdb.berkeley.edu/cgi/eme_query?bnhm_id=EMEC344549&one=T	EMEC	EMEC	PreservedSpecimen	EMEC344549	Kipling Will, Frank Hsu, Riva Madan	1	adult	pin	6/11/2015	United States	Nevada	White Pine County	Great Basin National Park, NF road 446		2732		39.02417	-114.27306	WGS1984	10			Pterostichus protractus LeConte, 1860	Animalia	Arthropoda	Insecta	Coleoptera	Carabidae	Pterostichus	protractus		LeConte, 1860
urn:catalog:EMEC:EMEC:344550	2/14/2016	https://creativecommons.org/publicdomain/zero/1.0/	http://vertnet.org/resources/norms.html	http://essigdb.berkeley.edu/cgi/eme_query?bnhm_id=EMEC344550&one=T	EMEC	EMEC	PreservedSpecimen	EMEC344550	Kipling Will, Frank Hsu, Riva Madan	1	adult	pin	6/11/2015	United States	Nevada	White Pine County	Great Basin National Park, NF road 446		2732		39.02417	-114.27306	WGS1984	10			Pterostichus protractus LeConte, 1860	Animalia	Arthropoda	Insecta	Coleoptera	Carabidae	Pterostichus	protractus		LeConte, 1860
urn:catalog:EMEC:EMEC:344452	9/13/2015	https://creativecommons.org/publicdomain/zero/1.0/	http://vertnet.org/resources/norms.html	http://essigdb.berkeley.edu/cgi/eme_query?bnhm_id=EMEC344452&one=T	EMEC	EMEC	PreservedSpecimen	EMEC344452	Kipling Will	1	adult	pin	6/14/2009	United States	Nevada	Elko County	Ruby Mountains, Lamoille Canyon		2496		40.6425	-115.3753	WGS1984	10			Pterostichus protractus LeConte, 1860	Animalia	Arthropoda	Insecta	Coleoptera	Carabidae	Pterostichus	protractus		LeConte, 1860
urn:catalog:EMEC:EMEC:344551	2/14/2016	https://creativecommons.org/publicdomain/zero/1.0/	http://vertnet.org/resources/norms.html	http://essigdb.berkeley.edu/cgi/eme_query?bnhm_id=EMEC344551&one=T	EMEC	EMEC	PreservedSpecimen	EMEC344551	Kipling Will, Frank Hsu, Riva Madan	1	adult	pin	2015-06-10/2015-06-13	United States	Nevada	White Pine County	Great Basin National Park, Snake Creek		2491		38.92528	-114.25222	WGS1984	10			Pterostichus protractus LeConte, 1860	Animalia	Arthropoda	Insecta	Coleoptera	Carabidae	Pterostichus	protractus		LeConte, 1860
urn:catalog:EMEC:EMEC:344552	2/14/2016	https://creativecommons.org/publicdomain/zero/1.0/	http://vertnet.org/resources/norms.html	http://essigdb.berkeley.edu/cgi/eme_query?bnhm_id=EMEC344552&one=T	EMEC	EMEC	PreservedSpecimen	EMEC344552	Kipling Will, Frank Hsu, Riva Madan	1	adult	pin	2015-06-10/2015-06-13	United States	Nevada	White Pine County	Great Basin National Park, Snake Creek		2491		38.92528	-114.25222	WGS1984	10			Pterostichus protractus LeConte, 1860	Animalia	Arthropoda	Insecta	Coleoptera	Carabidae	Pterostichus	protractus		LeConte, 1860
urn:catalog:EMEC:EMEC:344553	2/14/2016	https://creativecommons.org/publicdomain/zero/1.0/	http://vertnet.org/resources/norms.html	http://essigdb.berkeley.edu/cgi/eme_query?bnhm_id=EMEC344553&one=T	EMEC	EMEC	PreservedSpecimen	EMEC344553	Kipling Will, Frank Hsu, Riva Madan	1	adult	pin	2015-06-10/2015-06-13	United States	Nevada	White Pine County	Great Basin National Park, Snake Creek		2491		38.92528	-114.25222	WGS1984	10			Pterostichus protractus LeConte, 1860	Animalia	Arthropoda	Insecta	Coleoptera	Carabidae	Pterostichus	protractus		LeConte, 1860
urn:catalog:EMEC:EMEC:344554	2/14/2016	https://creativecommons.org/publicdomain/zero/1.0/	http://vertnet.org/resources/norms.html	http://essigdb.berkeley.edu/cgi/eme_query?bnhm_id=EMEC344554&one=T	EMEC	EMEC	PreservedSpecimen	EMEC344554	Kipling Will, Frank Hsu, Riva Madan	1	adult	pin	2015-06-10/2015-06-13	United States	Nevada	White Pine County	Great Basin National Park, Snake Creek		2491		38.92528	-114.25222	WGS1984	10			Pterostichus protractus LeConte, 1860	Animalia	Arthropoda	Insecta	Coleoptera	Carabidae	Pterostichus	protractus		LeConte, 1860
urn:catalog:EMEC:EMEC:344555	2/14/2016	https://creativecommons.org/publicdomain/zero/1.0/	http://vertnet.org/resources/norms.html	http://essigdb.berkeley.edu/cgi/eme_query?bnhm_id=EMEC344555&one=T	EMEC	EMEC	PreservedSpecimen	EMEC344555	Kipling Will, Frank Hsu, Riva Madan	1	adult	pin	2015-06-10/2015-06-13	United States	Nevada	White Pine County	Great Basin National Park, Snake Creek		2491		38.92528	-114.25222	WGS1984	10			Pterostichus protractus LeConte, 1860	Animalia	Arthropoda	Insecta	Coleoptera	Carabidae	Pterostichus	protractus		LeConte, 1860
urn:catalog:EMEC:EMEC:344556	2/14/2016	https://creativecommons.org/publicdomain/zero/1.0/	http://vertnet.org/resources/norms.html	http://essigdb.berkeley.edu/cgi/eme_query?bnhm_id=EMEC344556&one=T	EMEC	EMEC	PreservedSpecimen	EMEC344556	Kipling Will, Frank Hsu, Riva Madan	1	adult	pin	2015-06-10/2015-06-13	United States	Nevada	White Pine County	Great Basin National Park, Snake Creek		2491		38.92528	-114.25222	WGS1984	10			Pterostichus protractus LeConte, 1860	Animalia	Arthropoda	Insecta	Coleoptera	Carabidae	Pterostichus	protractus		LeConte, 1860
urn:catalog:EMEC:EMEC:344557	2/14/2016	https://creativecommons.org/publicdomain/zero/1.0/	http://vertnet.org/resources/norms.html	http://essigdb.berkeley.edu/cgi/eme_query?bnhm_id=EMEC344557&one=T	EMEC	EMEC	PreservedSpecimen	EMEC344557	Kipling Will, Frank Hsu, Riva Madan	1	adult	pin	2015-06-10/2015-06-13	United States	Nevada	White Pine County	Great Basin National Park, Snake Creek		2491		38.92528	-114.25222	WGS1984	10			Pterostichus protractus LeConte, 1860	Animalia	Arthropoda	Insecta	Coleoptera	Carabidae	Pterostichus	protractus		LeConte, 1860
urn:catalog:EMEC:EMEC:344558	2/14/2016	https://creativecommons.org/publicdomain/zero/1.0/	http://vertnet.org/resources/norms.html	http://essigdb.berkeley.edu/cgi/eme_query?bnhm_id=EMEC344558&one=T	EMEC	EMEC	PreservedSpecimen	EMEC344558	Kipling Will, Frank Hsu, Riva Madan	1	adult	pin	2015-06-10/2015-06-13	United States	Nevada	White Pine County	Great Basin National Park, Snake Creek		2491		38.92528	-114.25222	WGS1984	10			Pterostichus protractus LeConte, 1860	Animalia	Arthropoda	Insecta	Coleoptera	Carabidae	Pterostichus	protractus		LeConte, 1860
urn:catalog:EMEC:EMEC:344559	2/14/2016	https://creativecommons.org/publicdomain/zero/1.0/	http://vertnet.org/resources/norms.html	http://essigdb.berkeley.edu/cgi/eme_query?bnhm_id=EMEC344559&one=T	EMEC	EMEC	PreservedSpecimen	EMEC344559	Kipling Will, Frank Hsu, Riva Madan	1	adult	pin	2015-06-10/2015-06-13	United States	Nevada	White Pine County	Great Basin National Park, Snake Creek		2491		38.92528	-114.25222	WGS1984	10			Pterostichus protractus LeConte, 1860	Animalia	Arthropoda	Insecta	Coleoptera	Carabidae	Pterostichus	protractus		LeConte, 1860
urn:catalog:EMEC:EMEC:344560	2/14/2016	https://creativecommons.org/publicdomain/zero/1.0/	http://vertnet.org/resources/norms.html	http://essigdb.berkeley.edu/cgi/eme_query?bnhm_id=EMEC344560&one=T	EMEC	EMEC	PreservedSpecimen	EMEC344560	Kipling Will, Frank Hsu, Riva Madan	1	adult	pin	2015-06-10/2015-06-13	United States	Nevada	White Pine County	Great Basin National Park, Snake Creek		2491		38.92528	-114.25222	WGS1984	10			Pterostichus protractus LeConte, 1860	Animalia	Arthropoda	Insecta	Coleoptera	Carabidae	Pterostichus	protractus		LeConte, 1860
urn:catalog:EMEC:EMEC:344453	9/13/2015	https://creativecommons.org/publicdomain/zero/1.0/	http://vertnet.org/resources/norms.html	http://essigdb.berkeley.edu/cgi/eme_query?bnhm_id=EMEC344453&one=T	EMEC	EMEC	PreservedSpecimen	EMEC344453	Kipling Will	1	adult	pin	6/14/2009	United States	Nevada	Elko County	Ruby Mountains, Lamoille Canyon		2496		40.6425	-115.3753	WGS1984	10			Pterostichus protractus LeConte, 1860	Animalia	Arthropoda	Insecta	Coleoptera	Carabidae	Pterostichus	protractus		LeConte, 1860
urn:catalog:EMEC:EMEC:344561	2/14/2016	https://creativecommons.org/publicdomain/zero/1.0/	http://vertnet.org/resources/norms.html	http://essigdb.berkeley.edu/cgi/eme_query?bnhm_id=EMEC344561&one=T	EMEC	EMEC	PreservedSpecimen	EMEC344561	Kipling Will, Frank Hsu, Riva Madan	1	adult	pin	2015-06-10/2015-06-13	United States	Nevada	White Pine County	Great Basin National Park, Snake Creek		2491		38.92528	-114.25222	WGS1984	10			Pterostichus protractus LeConte, 1860	Animalia	Arthropoda	Insecta	Coleoptera	Carabidae	Pterostichus	protractus		LeConte, 1860
urn:catalog:EMEC:EMEC:344562	2/14/2016	https://creativecommons.org/publicdomain/zero/1.0/	http://vertnet.org/resources/norms.html	http://essigdb.berkeley.edu/cgi/eme_query?bnhm_id=EMEC344562&one=T	EMEC	EMEC	PreservedSpecimen	EMEC344562	Kipling Will, Frank Hsu, Riva Madan	1	adult	pin	2015-06-11/2015-06-13	United States	Nevada	White Pine County	Great Basin National Park, Blue Canyon		2433		39.05361	-114.3025	WGS1984	10			Pterostichus protractus LeConte, 1860	Animalia	Arthropoda	Insecta	Coleoptera	Carabidae	Pterostichus	protractus		LeConte, 1860
urn:catalog:EMEC:EMEC:344563	2/14/2016	https://creativecommons.org/publicdomain/zero/1.0/	http://vertnet.org/resources/norms.html	http://essigdb.berkeley.edu/cgi/eme_query?bnhm_id=EMEC344563&one=T	EMEC	EMEC	PreservedSpecimen	EMEC344563	Kipling Will, Frank Hsu, Riva Madan	1	adult	pin	2015-06-11/2015-06-13	United States	Nevada	White Pine County	Great Basin National Park, Blue Canyon		2433		39.05361	-114.3025	WGS1984	10			Pterostichus protractus LeConte, 1860	Animalia	Arthropoda	Insecta	Coleoptera	Carabidae	Pterostichus	protractus		LeConte, 1860
urn:catalog:EMEC:EMEC:344564	2/14/2016	https://creativecommons.org/publicdomain/zero/1.0/	http://vertnet.org/resources/norms.html	http://essigdb.berkeley.edu/cgi/eme_query?bnhm_id=EMEC344564&one=T	EMEC	EMEC	PreservedSpecimen	EMEC344564	Kipling Will, Frank Hsu, Riva Madan	1	adult	pin	2015-06-11/2015-06-13	United States	Nevada	White Pine County	Great Basin National Park, Blue Canyon		2433		39.05361	-114.3025	WGS1984	10			Pterostichus protractus LeConte, 1860	Animalia	Arthropoda	Insecta	Coleoptera	Carabidae	Pterostichus	protractus		LeConte, 1860
urn:catalog:EMEC:EMEC:344565	2/14/2016	https://creativecommons.org/publicdomain/zero/1.0/	http://vertnet.org/resources/norms.html	http://essigdb.berkeley.edu/cgi/eme_query?bnhm_id=EMEC344565&one=T	EMEC	EMEC	PreservedSpecimen	EMEC344565	Kipling Will, Frank Hsu, Riva Madan	1	adult	pin	2015-06-11/2015-06-13	United States	Nevada	White Pine County	Great Basin National Park, Blue Canyon		2433		39.05361	-114.3025	WGS1984	10			Pterostichus protractus LeConte, 1860	Animalia	Arthropoda	Insecta	Coleoptera	Carabidae	Pterostichus	protractus		LeConte, 1860
urn:catalog:EMEC:EMEC:344566	2/14/2016	https://creativecommons.org/publicdomain/zero/1.0/	http://vertnet.org/resources/norms.html	http://essigdb.berkeley.edu/cgi/eme_query?bnhm_id=EMEC344566&one=T	EMEC	EMEC	PreservedSpecimen	EMEC344566	Kipling Will, Frank Hsu, Riva Madan	1	adult	pin	2015-06-11/2015-06-13	United States	Nevada	White Pine County	Great Basin National Park, Blue Canyon		2433		39.05361	-114.3025	WGS1984	10			Pterostichus protractus LeConte, 1860	Animalia	Arthropoda	Insecta	Coleoptera	Carabidae	Pterostichus	protractus		LeConte, 1860
urn:catalog:EMEC:EMEC:344567	2/14/2016	https://creativecommons.org/publicdomain/zero/1.0/	http://vertnet.org/resources/norms.html	http://essigdb.berkeley.edu/cgi/eme_query?bnhm_id=EMEC344567&one=T	EMEC	EMEC	PreservedSpecimen	EMEC344567	Kipling Will, Frank Hsu, Riva Madan	1	adult	pin	2015-06-11/2015-06-13	United States	Nevada	White Pine County	Great Basin National Park, Blue Canyon		2433		39.05361	-114.3025	WGS1984	10			Pterostichus protractus LeConte, 1860	Animalia	Arthropoda	Insecta	Coleoptera	Carabidae	Pterostichus	protractus		LeConte, 1860
urn:catalog:EMEC:EMEC:344568	2/14/2016	https://creativecommons.org/publicdomain/zero/1.0/	http://vertnet.org/resources/norms.html	http://essigdb.berkeley.edu/cgi/eme_query?bnhm_id=EMEC344568&one=T	EMEC	EMEC	PreservedSpecimen	EMEC344568	Kipling Will, Frank Hsu, Riva Madan	1	adult	pin	2015-06-11/2015-06-13	United States	Nevada	White Pine County	Great Basin National Park, Blue Canyon		2433		39.05361	-114.3025	WGS1984	10			Pterostichus protractus LeConte, 1860	Animalia	Arthropoda	Insecta	Coleoptera	Carabidae	Pterostichus	protractus		LeConte, 1860
urn:catalog:EMEC:EMEC:344569	2/14/2016	https://creativecommons.org/publicdomain/zero/1.0/	http://vertnet.org/resources/norms.html	http://essigdb.berkeley.edu/cgi/eme_query?bnhm_id=EMEC344569&one=T	EMEC	EMEC	PreservedSpecimen	EMEC344569	Kipling Will, Frank Hsu, Riva Madan	1	adult	pin	2015-06-11/2015-06-13	United States	Nevada	White Pine County	Great Basin National Park, Blue Canyon		2433		39.05361	-114.3025	WGS1984	10			Pterostichus protractus LeConte, 1860	Animalia	Arthropoda	Insecta	Coleoptera	Carabidae	Pterostichus	protractus		LeConte, 1860
urn:catalog:EMEC:EMEC:344570	2/14/2016	https://creativecommons.org/publicdomain/zero/1.0/	http://vertnet.org/resources/norms.html	http://essigdb.berkeley.edu/cgi/eme_query?bnhm_id=EMEC344570&one=T	EMEC	EMEC	PreservedSpecimen	EMEC344570	Kipling Will, Frank Hsu, Riva Madan	1	adult	pin	2015-06-11/2015-06-13	United States	Nevada	White Pine County	Great Basin National Park, Blue Canyon		2433		39.05361	-114.3025	WGS1984	10			Pterostichus protractus LeConte, 1860	Animalia	Arthropoda	Insecta	Coleoptera	Carabidae	Pterostichus	protractus		LeConte, 1860
urn:catalog:EMEC:EMEC:344454	9/13/2015	https://creativecommons.org/publicdomain/zero/1.0/	http://vertnet.org/resources/norms.html	http://essigdb.berkeley.edu/cgi/eme_query?bnhm_id=EMEC344454&one=T	EMEC	EMEC	PreservedSpecimen	EMEC344454	Kipling Will	1	adult	pin	6/14/2009	United States	Nevada	Elko County	Ruby Mountains, Lamoille Canyon		2496		40.6425	-115.3753	WGS1984	10			Pterostichus protractus LeConte, 1860	Animalia	Arthropoda	Insecta	Coleoptera	Carabidae	Pterostichus	protractus		LeConte, 1860
urn:catalog:EMEC:EMEC:344571	2/14/2016	https://creativecommons.org/publicdomain/zero/1.0/	http://vertnet.org/resources/norms.html	http://essigdb.berkeley.edu/cgi/eme_query?bnhm_id=EMEC344571&one=T	EMEC	EMEC	PreservedSpecimen	EMEC344571	Kipling Will, Frank Hsu, Riva Madan	1	adult	pin	2015-06-11/2015-06-13	United States	Nevada	White Pine County	Great Basin National Park, Blue Canyon		2433		39.05361	-114.3025	WGS1984	10			Pterostichus protractus LeConte, 1860	Animalia	Arthropoda	Insecta	Coleoptera	Carabidae	Pterostichus	protractus		LeConte, 1860
urn:catalog:EMEC:EMEC:344572	2/14/2016	https://creativecommons.org/publicdomain/zero/1.0/	http://vertnet.org/resources/norms.html	http://essigdb.berkeley.edu/cgi/eme_query?bnhm_id=EMEC344572&one=T	EMEC	EMEC	PreservedSpecimen	EMEC344572	Kipling Will, Frank Hsu, Riva Madan	1	adult	pin	2015-06-11/2015-06-13	United States	Nevada	White Pine County	Great Basin National Park, Blue Canyon		2433		39.05361	-114.3025	WGS1984	10			Pterostichus protractus LeConte, 1860	Animalia	Arthropoda	Insecta	Coleoptera	Carabidae	Pterostichus	protractus		LeConte, 1860
urn:catalog:EMEC:EMEC:344573	2/14/2016	https://creativecommons.org/publicdomain/zero/1.0/	http://vertnet.org/resources/norms.html	http://essigdb.berkeley.edu/cgi/eme_query?bnhm_id=EMEC344573&one=T	EMEC	EMEC	PreservedSpecimen	EMEC344573	Kipling Will, Frank Hsu, Riva Madan	1	adult	pin	2015-06-11/2015-06-13	United States	Nevada	White Pine County	Great Basin National Park, Blue Canyon		2433		39.05361	-114.3025	WGS1984	10			Pterostichus protractus LeConte, 1860	Animalia	Arthropoda	Insecta	Coleoptera	Carabidae	Pterostichus	protractus		LeConte, 1860
urn:catalog:EMEC:EMEC:344574	2/14/2016	https://creativecommons.org/publicdomain/zero/1.0/	http://vertnet.org/resources/norms.html	http://essigdb.berkeley.edu/cgi/eme_query?bnhm_id=EMEC344574&one=T	EMEC	EMEC	PreservedSpecimen	EMEC344574	Kipling Will, Frank Hsu, Riva Madan	1	adult	pin	6/13/2015	United States	Nevada	White Pine County	Great Basin National Park, Wheeler Peak Trailhead		3036		39.00944	-114.30722	WGS1984	10			Pterostichus protractus LeConte, 1860	Animalia	Arthropoda	Insecta	Coleoptera	Carabidae	Pterostichus	protractus		LeConte, 1860
urn:catalog:EMEC:EMEC:344575	2/14/2016	https://creativecommons.org/publicdomain/zero/1.0/	http://vertnet.org/resources/norms.html	http://essigdb.berkeley.edu/cgi/eme_query?bnhm_id=EMEC344575&one=T	EMEC	EMEC	PreservedSpecimen	EMEC344575	Kipling Will, Frank Hsu, Riva Madan	1	adult	pin	6/13/2015	United States	Nevada	White Pine County	Great Basin National Park, Wheeler Peak Trailhead		3036		39.00944	-114.30722	WGS1984	10			Pterostichus protractus LeConte, 1860	Animalia	Arthropoda	Insecta	Coleoptera	Carabidae	Pterostichus	protractus		LeConte, 1860
urn:catalog:EMEC:EMEC:344576	2/14/2016	https://creativecommons.org/publicdomain/zero/1.0/	http://vertnet.org/resources/norms.html	http://essigdb.berkeley.edu/cgi/eme_query?bnhm_id=EMEC344576&one=T	EMEC	EMEC	PreservedSpecimen	EMEC344576	Kipling Will, Frank Hsu, Riva Madan	1	adult	pin	6/13/2015	United States	Nevada	White Pine County	Great Basin National Park, Wheeler Peak Trailhead		3036		39.00944	-114.30722	WGS1984	10			Pterostichus protractus LeConte, 1860	Animalia	Arthropoda	Insecta	Coleoptera	Carabidae	Pterostichus	protractus		LeConte, 1860
urn:catalog:EMEC:EMEC:344577	2/14/2016	https://creativecommons.org/publicdomain/zero/1.0/	http://vertnet.org/resources/norms.html	http://essigdb.berkeley.edu/cgi/eme_query?bnhm_id=EMEC344577&one=T	EMEC	EMEC	PreservedSpecimen	EMEC344577	Kipling Will, Frank Hsu, Riva Madan	1	adult	pin	6/13/2015	United States	Nevada	White Pine County	Great Basin National Park, Wheeler Peak Trailhead		3036		39.00944	-114.30722	WGS1984	10			Pterostichus protractus LeConte, 1860	Animalia	Arthropoda	Insecta	Coleoptera	Carabidae	Pterostichus	protractus		LeConte, 1860
urn:catalog:EMEC:EMEC:344578	2/14/2016	https://creativecommons.org/publicdomain/zero/1.0/	http://vertnet.org/resources/norms.html	http://essigdb.berkeley.edu/cgi/eme_query?bnhm_id=EMEC344578&one=T	EMEC	EMEC	PreservedSpecimen	EMEC344578	Kipling Will, Frank Hsu, Riva Madan	1	adult	pin	2015-06-11/2015-06-13	United States	Nevada	White Pine County	Great Basin National Park, Osceola Ditch Trail		2542		39.02917	-114.26583	WGS1984	10			Pterostichus protractus LeConte, 1860	Animalia	Arthropoda	Insecta	Coleoptera	Carabidae	Pterostichus	protractus		LeConte, 1860
urn:catalog:EMEC:EMEC:344579	2/14/2016	https://creativecommons.org/publicdomain/zero/1.0/	http://vertnet.org/resources/norms.html	http://essigdb.berkeley.edu/cgi/eme_query?bnhm_id=EMEC344579&one=T	EMEC	EMEC	PreservedSpecimen	EMEC344579	Kipling Will, Frank Hsu, Riva Madan	1	adult	pin	2015-06-11/2015-06-13	United States	Nevada	White Pine County	Great Basin National Park, Osceola Ditch Trail		2542		39.02917	-114.26583	WGS1984	10			Pterostichus protractus LeConte, 1860	Animalia	Arthropoda	Insecta	Coleoptera	Carabidae	Pterostichus	protractus		LeConte, 1860
urn:catalog:EMEC:EMEC:344580	2/14/2016	https://creativecommons.org/publicdomain/zero/1.0/	http://vertnet.org/resources/norms.html	http://essigdb.berkeley.edu/cgi/eme_query?bnhm_id=EMEC344580&one=T	EMEC	EMEC	PreservedSpecimen	EMEC344580	Kipling Will, Frank Hsu, Riva Madan	1	adult	pin	2015-06-11/2015-06-13	United States	Nevada	White Pine County	Great Basin National Park, NF road 446		2732		39.02417	-114.27306	WGS1984	10			Pterostichus protractus LeConte, 1860	Animalia	Arthropoda	Insecta	Coleoptera	Carabidae	Pterostichus	protractus		LeConte, 1860
urn:catalog:EMEC:EMEC:344455	9/13/2015	https://creativecommons.org/publicdomain/zero/1.0/	http://vertnet.org/resources/norms.html	http://essigdb.berkeley.edu/cgi/eme_query?bnhm_id=EMEC344455&one=T	EMEC	EMEC	PreservedSpecimen	EMEC344455	Kipling Will	1	adult	pin	6/14/2009	United States	Nevada	Elko County	Ruby Mountains, Lamoille Canyon		2496		40.6425	-115.3753	WGS1984	10			Pterostichus protractus LeConte, 1860	Animalia	Arthropoda	Insecta	Coleoptera	Carabidae	Pterostichus	protractus		LeConte, 1860
urn:catalog:EMEC:EMEC:344581	2/14/2016	https://creativecommons.org/publicdomain/zero/1.0/	http://vertnet.org/resources/norms.html	http://essigdb.berkeley.edu/cgi/eme_query?bnhm_id=EMEC344581&one=T	EMEC	EMEC	PreservedSpecimen	EMEC344581	Kipling Will, Frank Hsu, Riva Madan	1	adult	pin	2015-06-11/2015-06-13	United States	Nevada	White Pine County	Great Basin National Park, NF road 446		2732		39.02417	-114.27306	WGS1984	10			Pterostichus protractus LeConte, 1860	Animalia	Arthropoda	Insecta	Coleoptera	Carabidae	Pterostichus	protractus		LeConte, 1860
urn:catalog:EMEC:EMEC:344582	2/14/2016	https://creativecommons.org/publicdomain/zero/1.0/	http://vertnet.org/resources/norms.html	http://essigdb.berkeley.edu/cgi/eme_query?bnhm_id=EMEC344582&one=T	EMEC	EMEC	PreservedSpecimen	EMEC344582	Kipling Will, Frank Hsu, Riva Madan	1	adult	pin	6/12/2015	United States	Nevada	White Pine County	Great Basin National Park, Teresa Lake		3140		39.0025	-114.31222	WGS1984	10			Pterostichus protractus LeConte, 1860	Animalia	Arthropoda	Insecta	Coleoptera	Carabidae	Pterostichus	protractus		LeConte, 1860
urn:catalog:EMEC:EMEC:344583	2/14/2016	https://creativecommons.org/publicdomain/zero/1.0/	http://vertnet.org/resources/norms.html	http://essigdb.berkeley.edu/cgi/eme_query?bnhm_id=EMEC344583&one=T	EMEC	EMEC	PreservedSpecimen	EMEC344583	Kipling Will, Frank Hsu, Riva Madan	1	adult	pin	6/12/2015	United States	Nevada	White Pine County	Great Basin National Park, Teresa Lake		3140		39.0025	-114.31222	WGS1984	10			Pterostichus protractus LeConte, 1860	Animalia	Arthropoda	Insecta	Coleoptera	Carabidae	Pterostichus	protractus		LeConte, 1860
urn:catalog:EMEC:EMEC:344584	2/14/2016	https://creativecommons.org/publicdomain/zero/1.0/	http://vertnet.org/resources/norms.html	http://essigdb.berkeley.edu/cgi/eme_query?bnhm_id=EMEC344584&one=T	EMEC	EMEC	PreservedSpecimen	EMEC344584	Kipling Will, Frank Hsu, Riva Madan	1	adult	pin	6/12/2015	United States	Nevada	White Pine County	Great Basin National Park, Teresa Lake		3140		39.0025	-114.31222	WGS1984	10			Pterostichus protractus LeConte, 1860	Animalia	Arthropoda	Insecta	Coleoptera	Carabidae	Pterostichus	protractus		LeConte, 1860
urn:catalog:EMEC:EMEC:344585	2/14/2016	https://creativecommons.org/publicdomain/zero/1.0/	http://vertnet.org/resources/norms.html	http://essigdb.berkeley.edu/cgi/eme_query?bnhm_id=EMEC344585&one=T	EMEC	EMEC	PreservedSpecimen	EMEC344585	Kipling Will, Frank Hsu, Riva Madan	1	adult	pin	6/12/2015	United States	Nevada	White Pine County	Great Basin National Park, Teresa Lake		3140		39.0025	-114.31222	WGS1984	10			Pterostichus protractus LeConte, 1860	Animalia	Arthropoda	Insecta	Coleoptera	Carabidae	Pterostichus	protractus		LeConte, 1860
urn:catalog:EMEC:EMEC:344586	2/14/2016	https://creativecommons.org/publicdomain/zero/1.0/	http://vertnet.org/resources/norms.html	http://essigdb.berkeley.edu/cgi/eme_query?bnhm_id=EMEC344586&one=T	EMEC	EMEC	PreservedSpecimen	EMEC344586	Kipling Will, Frank Hsu, Riva Madan	1	adult	pin	6/12/2015	United States	Nevada	White Pine County	Great Basin National Park, Teresa Lake		3140		39.0025	-114.31222	WGS1984	10			Pterostichus protractus LeConte, 1860	Animalia	Arthropoda	Insecta	Coleoptera	Carabidae	Pterostichus	protractus		LeConte, 1860
urn:catalog:EMEC:EMEC:344587	2/14/2016	https://creativecommons.org/publicdomain/zero/1.0/	http://vertnet.org/resources/norms.html	http://essigdb.berkeley.edu/cgi/eme_query?bnhm_id=EMEC344587&one=T	EMEC	EMEC	PreservedSpecimen	EMEC344587	Kipling Will, Frank Hsu, Riva Madan	1	adult	pin	6/12/2015	United States	Nevada	White Pine County	Great Basin National Park, Teresa Lake		3140		39.0025	-114.31222	WGS1984	10			Pterostichus protractus LeConte, 1860	Animalia	Arthropoda	Insecta	Coleoptera	Carabidae	Pterostichus	protractus		LeConte, 1860
urn:catalog:EMEC:EMEC:344588	2/14/2016	https://creativecommons.org/publicdomain/zero/1.0/	http://vertnet.org/resources/norms.html	http://essigdb.berkeley.edu/cgi/eme_query?bnhm_id=EMEC344588&one=T	EMEC	EMEC	PreservedSpecimen	EMEC344588	Kipling Will, Frank Hsu, Riva Madan	1	adult	pin	6/12/2015	United States	Nevada	White Pine County	Great Basin National Park, Teresa Lake		3140		39.0025	-114.31222	WGS1984	10			Pterostichus protractus LeConte, 1860	Animalia	Arthropoda	Insecta	Coleoptera	Carabidae	Pterostichus	protractus		LeConte, 1860
urn:catalog:EMEC:EMEC:344589	2/14/2016	https://creativecommons.org/publicdomain/zero/1.0/	http://vertnet.org/resources/norms.html	http://essigdb.berkeley.edu/cgi/eme_query?bnhm_id=EMEC344589&one=T	EMEC	EMEC	PreservedSpecimen	EMEC344589	Kipling Will, Frank Hsu, Riva Madan	1	adult	pin	6/12/2015	United States	Nevada	White Pine County	Great Basin National Park, Teresa Lake		3140		39.0025	-114.31222	WGS1984	10			Pterostichus protractus LeConte, 1860	Animalia	Arthropoda	Insecta	Coleoptera	Carabidae	Pterostichus	protractus		LeConte, 1860
urn:catalog:EMEC:EMEC:344590	2/14/2016	https://creativecommons.org/publicdomain/zero/1.0/	http://vertnet.org/resources/norms.html	http://essigdb.berkeley.edu/cgi/eme_query?bnhm_id=EMEC344590&one=T	EMEC	EMEC	PreservedSpecimen	EMEC344590	Kipling Will, Frank Hsu, Riva Madan	1	adult	pin	6/12/2015	United States	Nevada	White Pine County	Great Basin National Park, Teresa Lake		3140		39.0025	-114.31222	WGS1984	10			Pterostichus protractus LeConte, 1860	Animalia	Arthropoda	Insecta	Coleoptera	Carabidae	Pterostichus	protractus		LeConte, 1860
urn:catalog:EMEC:EMEC:344456	9/13/2015	https://creativecommons.org/publicdomain/zero/1.0/	http://vertnet.org/resources/norms.html	http://essigdb.berkeley.edu/cgi/eme_query?bnhm_id=EMEC344456&one=T	EMEC	EMEC	PreservedSpecimen	EMEC344456	Kipling Will	1	adult	pin	6/14/2009	United States	Nevada	Elko County	Ruby Mountains, Lamoille Canyon		2496		40.6425	-115.3753	WGS1984	10			Pterostichus protractus LeConte, 1860	Animalia	Arthropoda	Insecta	Coleoptera	Carabidae	Pterostichus	protractus		LeConte, 1860
urn:catalog:EMEC:EMEC:344591	2/14/2016	https://creativecommons.org/publicdomain/zero/1.0/	http://vertnet.org/resources/norms.html	http://essigdb.berkeley.edu/cgi/eme_query?bnhm_id=EMEC344591&one=T	EMEC	EMEC	PreservedSpecimen	EMEC344591	Kipling Will, Frank Hsu, Riva Madan	1	adult	pin	6/10/2015	United States	Nevada	White Pine County	Great Basin National Park, Baker Lake Trail		2370		38.98194	-114.24361	WGS1984	10			Pterostichus protractus LeConte, 1860	Animalia	Arthropoda	Insecta	Coleoptera	Carabidae	Pterostichus	protractus		LeConte, 1860
urn:catalog:EMEC:EMEC:344592	2/14/2016	https://creativecommons.org/publicdomain/zero/1.0/	http://vertnet.org/resources/norms.html	http://essigdb.berkeley.edu/cgi/eme_query?bnhm_id=EMEC344592&one=T	EMEC	EMEC	PreservedSpecimen	EMEC344592	Kipling Will, Frank Hsu, Riva Madan	1	adult	pin	6/10/2015	United States	Nevada	White Pine County	Great Basin National Park, Baker Lake Trail		2370		38.98194	-114.24361	WGS1984	10			Pterostichus protractus LeConte, 1860	Animalia	Arthropoda	Insecta	Coleoptera	Carabidae	Pterostichus	protractus		LeConte, 1860
urn:catalog:EMEC:EMEC:344593	2/14/2016	https://creativecommons.org/publicdomain/zero/1.0/	http://vertnet.org/resources/norms.html	http://essigdb.berkeley.edu/cgi/eme_query?bnhm_id=EMEC344593&one=T	EMEC	EMEC	PreservedSpecimen	EMEC344593	Kipling Will, Frank Hsu, Riva Madan	1	adult	pin	6/10/2015	United States	Nevada	White Pine County	Great Basin National Park, Baker Lake Trail		2370		38.98194	-114.24361	WGS1984	10			Pterostichus protractus LeConte, 1860	Animalia	Arthropoda	Insecta	Coleoptera	Carabidae	Pterostichus	protractus		LeConte, 1860
urn:catalog:EMEC:EMEC:344594	2/14/2016	https://creativecommons.org/publicdomain/zero/1.0/	http://vertnet.org/resources/norms.html	http://essigdb.berkeley.edu/cgi/eme_query?bnhm_id=EMEC344594&one=T	EMEC	EMEC	PreservedSpecimen	EMEC344594	Kipling Will, Frank Hsu, Riva Madan	1	adult	pin	6/10/2015	United States	Nevada	White Pine County	Great Basin National Park, Baker Lake Trail		2370		38.98194	-114.24361	WGS1984	10			Pterostichus protractus LeConte, 1860	Animalia	Arthropoda	Insecta	Coleoptera	Carabidae	Pterostichus	protractus		LeConte, 1860
urn:catalog:EMEC:EMEC:344595	2/14/2016	https://creativecommons.org/publicdomain/zero/1.0/	http://vertnet.org/resources/norms.html	http://essigdb.berkeley.edu/cgi/eme_query?bnhm_id=EMEC344595&one=T	EMEC	EMEC	PreservedSpecimen	EMEC344595	Kipling Will, Frank Hsu, Riva Madan	1	adult	pin	6/10/2015	United States	Nevada	White Pine County	Great Basin National Park, Baker Lake Trail		2370		38.98194	-114.24361	WGS1984	10			Pterostichus protractus LeConte, 1860	Animalia	Arthropoda	Insecta	Coleoptera	Carabidae	Pterostichus	protractus		LeConte, 1860
urn:catalog:EMEC:EMEC:344596	2/14/2016	https://creativecommons.org/publicdomain/zero/1.0/	http://vertnet.org/resources/norms.html	http://essigdb.berkeley.edu/cgi/eme_query?bnhm_id=EMEC344596&one=T	EMEC	EMEC	PreservedSpecimen	EMEC344596	Kipling Will, Frank Hsu, Riva Madan	1	adult	pin	6/10/2015	United States	Nevada	White Pine County	Great Basin National Park, Baker Lake Trail		2370		38.98194	-114.24361	WGS1984	10			Pterostichus protractus LeConte, 1860	Animalia	Arthropoda	Insecta	Coleoptera	Carabidae	Pterostichus	protractus		LeConte, 1860
urn:catalog:EMEC:EMEC:344597	2/14/2016	https://creativecommons.org/publicdomain/zero/1.0/	http://vertnet.org/resources/norms.html	http://essigdb.berkeley.edu/cgi/eme_query?bnhm_id=EMEC344597&one=T	EMEC	EMEC	PreservedSpecimen	EMEC344597	Kipling Will, Frank Hsu, Riva Madan	1	adult	pin	2015-06-11/2015-06-13	United States	Nevada	White Pine County	Great Basin National Park, Blue Canyon		2439		39.05361	-114.30194	WGS1984	10			Pterostichus protractus LeConte, 1860	Animalia	Arthropoda	Insecta	Coleoptera	Carabidae	Pterostichus	protractus		LeConte, 1860
urn:catalog:EMEC:EMEC:344457	9/13/2015	https://creativecommons.org/publicdomain/zero/1.0/	http://vertnet.org/resources/norms.html	http://essigdb.berkeley.edu/cgi/eme_query?bnhm_id=EMEC344457&one=T	EMEC	EMEC	PreservedSpecimen	EMEC344457	Kipling Will	1	adult	pin	6/12/2009	United States	Nevada	Elko County	Ruby Mountains, 1.3 kilometers northwest of Harrison Pass		2173		40.3328	-115.5222	WGS1984	10			Pterostichus protractus LeConte, 1860	Animalia	Arthropoda	Insecta	Coleoptera	Carabidae	Pterostichus	protractus		LeConte, 1860
urn:catalog:EMEC:EMEC:344458	9/13/2015	https://creativecommons.org/publicdomain/zero/1.0/	http://vertnet.org/resources/norms.html	http://essigdb.berkeley.edu/cgi/eme_query?bnhm_id=EMEC344458&one=T	EMEC	EMEC	PreservedSpecimen	EMEC344458	Kipling Will	1	adult	pin	6/12/2009	United States	Nevada	Elko County	Ruby Mountains, 4.1 kilometers south of Harrison Pass		2311		40.2883	-115.5114	WGS1984	10			Pterostichus protractus LeConte, 1860	Animalia	Arthropoda	Insecta	Coleoptera	Carabidae	Pterostichus	protractus		LeConte, 1860
urn:catalog:EMEC:EMEC:344459	9/13/2015	https://creativecommons.org/publicdomain/zero/1.0/	http://vertnet.org/resources/norms.html	http://essigdb.berkeley.edu/cgi/eme_query?bnhm_id=EMEC344459&one=T	EMEC	EMEC	PreservedSpecimen	EMEC344459	Kipling Will	1	adult	pin	6/12/2009	United States	Nevada	Elko County	Ruby Mountains, 4.1 kilometers south of Harrison Pass		2311		40.2883	-115.5114	WGS1984	10			Pterostichus protractus LeConte, 1860	Animalia	Arthropoda	Insecta	Coleoptera	Carabidae	Pterostichus	protractus		LeConte, 1860
urn:catalog:EMEC:EMEC:344460	9/13/2015	https://creativecommons.org/publicdomain/zero/1.0/	http://vertnet.org/resources/norms.html	http://essigdb.berkeley.edu/cgi/eme_query?bnhm_id=EMEC344460&one=T	EMEC	EMEC	PreservedSpecimen	EMEC344460	Kipling Will	1	adult	pin	6/12/2009	United States	Nevada	Elko County	Ruby Mountains, 4.1 kilometers south of Harrison Pass		2311		40.2883	-115.5114	WGS1984	10			Pterostichus protractus LeConte, 1860	Animalia	Arthropoda	Insecta	Coleoptera	Carabidae	Pterostichus	protractus		LeConte, 1860
urn:catalog:EMEC:EMEC:344443	9/13/2015	https://creativecommons.org/publicdomain/zero/1.0/	http://vertnet.org/resources/norms.html	http://essigdb.berkeley.edu/cgi/eme_query?bnhm_id=EMEC344443&one=T	EMEC	EMEC	PreservedSpecimen	EMEC344443	Kipling Will	1	adult	pin	6/14/2009	United States	Nevada	Elko County	Ruby Mountains, Lamoille Canyon		2496		40.6425	-115.3753	WGS1984	10			Pterostichus protractus LeConte, 1860	Animalia	Arthropoda	Insecta	Coleoptera	Carabidae	Pterostichus	protractus		LeConte, 1860
urn:catalog:EMEC:EMEC:344461		https://creativecommons.org/publicdomain/zero/1.0/	http://vertnet.org/resources/norms.html	http://essigdb.berkeley.edu/cgi/eme_query?bnhm_id=EMEC344461&one=T	EMEC	EMEC	PreservedSpecimen	EMEC344461	Kipling Will, Rolf Aalbu	1	adult	pin	6/3/2012	United States	Nevada	Lander County	North Fork Big Creek		2535		39.3583	-117.0953	WGS1984	10			Pterostichus protractus LeConte, 1860	Animalia	Arthropoda	Insecta	Coleoptera	Carabidae	Pterostichus	protractus		LeConte, 1860
urn:catalog:EMEC:EMEC:344462		https://creativecommons.org/publicdomain/zero/1.0/	http://vertnet.org/resources/norms.html	http://essigdb.berkeley.edu/cgi/eme_query?bnhm_id=EMEC344462&one=T	EMEC	EMEC	PreservedSpecimen	EMEC344462	Kipling Will, Rolf Aalbu	1	adult	pin	6/3/2012	United States	Nevada	Lander County	North Fork Big Creek		2267		39.3453	-117.1061	WGS1984	10			Pterostichus protractus LeConte, 1860	Animalia	Arthropoda	Insecta	Coleoptera	Carabidae	Pterostichus	protractus		LeConte, 1860
urn:catalog:EMEC:EMEC:344463	2/14/2016	https://creativecommons.org/publicdomain/zero/1.0/	http://vertnet.org/resources/norms.html	http://essigdb.berkeley.edu/cgi/eme_query?bnhm_id=EMEC344463&one=T	EMEC	EMEC	PreservedSpecimen	EMEC344463	Kipling Will, Frank Hsu, Riva Madan	1	adult	pin	6/10/2015	United States	Nevada	White Pine County	Great Basin National Park, Baker Lake Trail		2370		38.98194	-114.24361	WGS1984	10			Pterostichus protractus LeConte, 1860	Animalia	Arthropoda	Insecta	Coleoptera	Carabidae	Pterostichus	protractus		LeConte, 1860
urn:catalog:EMEC:EMEC:344464	2/14/2016	https://creativecommons.org/publicdomain/zero/1.0/	http://vertnet.org/resources/norms.html	http://essigdb.berkeley.edu/cgi/eme_query?bnhm_id=EMEC344464&one=T	EMEC	EMEC	PreservedSpecimen	EMEC344464	Kipling Will, Frank Hsu, Riva Madan	1	adult	pin	6/10/2015	United States	Nevada	White Pine County	Great Basin National Park, Baker Lake Trail		2370		38.98194	-114.24361	WGS1984	10			Pterostichus protractus LeConte, 1860	Animalia	Arthropoda	Insecta	Coleoptera	Carabidae	Pterostichus	protractus		LeConte, 1860
urn:catalog:EMEC:EMEC:344465	2/14/2016	https://creativecommons.org/publicdomain/zero/1.0/	http://vertnet.org/resources/norms.html	http://essigdb.berkeley.edu/cgi/eme_query?bnhm_id=EMEC344465&one=T	EMEC	EMEC	PreservedSpecimen	EMEC344465	Kipling Will, Frank Hsu, Riva Madan	1	adult	pin	6/10/2015	United States	Nevada	White Pine County	Great Basin National Park, Baker Lake Trail		2370		38.98194	-114.24361	WGS1984	10			Pterostichus protractus LeConte, 1860	Animalia	Arthropoda	Insecta	Coleoptera	Carabidae	Pterostichus	protractus		LeConte, 1860
urn:catalog:EMEC:EMEC:344466	2/14/2016	https://creativecommons.org/publicdomain/zero/1.0/	http://vertnet.org/resources/norms.html	http://essigdb.berkeley.edu/cgi/eme_query?bnhm_id=EMEC344466&one=T	EMEC	EMEC	PreservedSpecimen	EMEC344466	Kipling Will, Frank Hsu, Riva Madan	1	adult	pin	6/10/2015	United States	Nevada	White Pine County	Great Basin National Park, Baker Lake Trail		2370		38.98194	-114.24361	WGS1984	10			Pterostichus protractus LeConte, 1860	Animalia	Arthropoda	Insecta	Coleoptera	Carabidae	Pterostichus	protractus		LeConte, 1860
urn:catalog:EMEC:EMEC:344467	2/14/2016	https://creativecommons.org/publicdomain/zero/1.0/	http://vertnet.org/resources/norms.html	http://essigdb.berkeley.edu/cgi/eme_query?bnhm_id=EMEC344467&one=T	EMEC	EMEC	PreservedSpecimen	EMEC344467	Kipling Will, Frank Hsu, Riva Madan	1	adult	pin	6/10/2015	United States	Nevada	White Pine County	Great Basin National Park, Baker Lake Trail		2370		38.98194	-114.24361	WGS1984	10			Pterostichus protractus LeConte, 1860	Animalia	Arthropoda	Insecta	Coleoptera	Carabidae	Pterostichus	protractus		LeConte, 1860
urn:catalog:EMEC:EMEC:344468	2/14/2016	https://creativecommons.org/publicdomain/zero/1.0/	http://vertnet.org/resources/norms.html	http://essigdb.berkeley.edu/cgi/eme_query?bnhm_id=EMEC344468&one=T	EMEC	EMEC	PreservedSpecimen	EMEC344468	Kipling Will, Frank Hsu, Riva Madan	1	adult	pin	6/10/2015	United States	Nevada	White Pine County	Great Basin National Park, Baker Lake Trail		2370		38.98194	-114.24361	WGS1984	10			Pterostichus protractus LeConte, 1860	Animalia	Arthropoda	Insecta	Coleoptera	Carabidae	Pterostichus	protractus		LeConte, 1860
urn:catalog:EMEC:EMEC:344469	2/14/2016	https://creativecommons.org/publicdomain/zero/1.0/	http://vertnet.org/resources/norms.html	http://essigdb.berkeley.edu/cgi/eme_query?bnhm_id=EMEC344469&one=T	EMEC	EMEC	PreservedSpecimen	EMEC344469	Kipling Will, Frank Hsu, Riva Madan	1	adult	pin	6/10/2015	United States	Nevada	White Pine County	Great Basin National Park, Baker Lake Trail		2370		38.98194	-114.24361	WGS1984	10			Pterostichus protractus LeConte, 1860	Animalia	Arthropoda	Insecta	Coleoptera	Carabidae	Pterostichus	protractus		LeConte, 1860
urn:catalog:EMEC:EMEC:344470	2/14/2016	https://creativecommons.org/publicdomain/zero/1.0/	http://vertnet.org/resources/norms.html	http://essigdb.berkeley.edu/cgi/eme_query?bnhm_id=EMEC344470&one=T	EMEC	EMEC	PreservedSpecimen	EMEC344470	Kipling Will, Frank Hsu, Riva Madan	1	adult	pin	6/10/2015	United States	Nevada	White Pine County	Great Basin National Park, Baker Lake Trail		2370		38.98194	-114.24361	WGS1984	10			Pterostichus protractus LeConte, 1860	Animalia	Arthropoda	Insecta	Coleoptera	Carabidae	Pterostichus	protractus		LeConte, 1860
urn:catalog:EMEC:EMEC:344444	9/13/2015	https://creativecommons.org/publicdomain/zero/1.0/	http://vertnet.org/resources/norms.html	http://essigdb.berkeley.edu/cgi/eme_query?bnhm_id=EMEC344444&one=T	EMEC	EMEC	PreservedSpecimen	EMEC344444	Kipling Will	1	adult	pin	6/14/2009	United States	Nevada	Elko County	Ruby Mountains, Lamoille Canyon		2496		40.6425	-115.3753	WGS1984	10			Pterostichus protractus LeConte, 1860	Animalia	Arthropoda	Insecta	Coleoptera	Carabidae	Pterostichus	protractus		LeConte, 1860
urn:catalog:EMEC:EMEC:344471	2/14/2016	https://creativecommons.org/publicdomain/zero/1.0/	http://vertnet.org/resources/norms.html	http://essigdb.berkeley.edu/cgi/eme_query?bnhm_id=EMEC344471&one=T	EMEC	EMEC	PreservedSpecimen	EMEC344471	Kipling Will, Frank Hsu, Riva Madan	1	adult	pin	6/10/2015	United States	Nevada	White Pine County	Great Basin National Park, Baker Lake Trail		2370		38.98194	-114.24361	WGS1984	10			Pterostichus protractus LeConte, 1860	Animalia	Arthropoda	Insecta	Coleoptera	Carabidae	Pterostichus	protractus		LeConte, 1860
urn:catalog:EMEC:EMEC:344472	2/14/2016	https://creativecommons.org/publicdomain/zero/1.0/	http://vertnet.org/resources/norms.html	http://essigdb.berkeley.edu/cgi/eme_query?bnhm_id=EMEC344472&one=T	EMEC	EMEC	PreservedSpecimen	EMEC344472	Kipling Will, Frank Hsu, Riva Madan	1	adult	pin	6/10/2015	United States	Nevada	White Pine County	Great Basin National Park, Baker Lake Trail		2370		38.98194	-114.24361	WGS1984	10			Pterostichus protractus LeConte, 1860	Animalia	Arthropoda	Insecta	Coleoptera	Carabidae	Pterostichus	protractus		LeConte, 1860
urn:catalog:EMEC:EMEC:344473	2/14/2016	https://creativecommons.org/publicdomain/zero/1.0/	http://vertnet.org/resources/norms.html	http://essigdb.berkeley.edu/cgi/eme_query?bnhm_id=EMEC344473&one=T	EMEC	EMEC	PreservedSpecimen	EMEC344473	Kipling Will, Frank Hsu, Riva Madan	1	adult	pin	6/10/2015	United States	Nevada	White Pine County	Great Basin National Park, Baker Lake Trail		2370		38.98194	-114.24361	WGS1984	10			Pterostichus protractus LeConte, 1860	Animalia	Arthropoda	Insecta	Coleoptera	Carabidae	Pterostichus	protractus		LeConte, 1860
urn:catalog:EMEC:EMEC:344474	2/14/2016	https://creativecommons.org/publicdomain/zero/1.0/	http://vertnet.org/resources/norms.html	http://essigdb.berkeley.edu/cgi/eme_query?bnhm_id=EMEC344474&one=T	EMEC	EMEC	PreservedSpecimen	EMEC344474	Kipling Will, Frank Hsu, Riva Madan	1	adult	pin	6/10/2015	United States	Nevada	White Pine County	Great Basin National Park, Baker Lake Trail		2370		38.98194	-114.24361	WGS1984	10			Pterostichus protractus LeConte, 1860	Animalia	Arthropoda	Insecta	Coleoptera	Carabidae	Pterostichus	protractus		LeConte, 1860
urn:catalog:EMEC:EMEC:344475	2/14/2016	https://creativecommons.org/publicdomain/zero/1.0/	http://vertnet.org/resources/norms.html	http://essigdb.berkeley.edu/cgi/eme_query?bnhm_id=EMEC344475&one=T	EMEC	EMEC	PreservedSpecimen	EMEC344475	Kipling Will, Frank Hsu, Riva Madan	1	adult	pin	6/10/2015	United States	Nevada	White Pine County	Great Basin National Park, Baker Lake Trail		2370		38.98194	-114.24361	WGS1984	10			Pterostichus protractus LeConte, 1860	Animalia	Arthropoda	Insecta	Coleoptera	Carabidae	Pterostichus	protractus		LeConte, 1860
urn:catalog:EMEC:EMEC:344476	2/14/2016	https://creativecommons.org/publicdomain/zero/1.0/	http://vertnet.org/resources/norms.html	http://essigdb.berkeley.edu/cgi/eme_query?bnhm_id=EMEC344476&one=T	EMEC	EMEC	PreservedSpecimen	EMEC344476	Kipling Will, Frank Hsu, Riva Madan	1	adult	pin	6/10/2015	United States	Nevada	White Pine County	Great Basin National Park, Baker Lake Trail		2370		38.98194	-114.24361	WGS1984	10			Pterostichus protractus LeConte, 1860	Animalia	Arthropoda	Insecta	Coleoptera	Carabidae	Pterostichus	protractus		LeConte, 1860
urn:catalog:EMEC:EMEC:344477	2/14/2016	https://creativecommons.org/publicdomain/zero/1.0/	http://vertnet.org/resources/norms.html	http://essigdb.berkeley.edu/cgi/eme_query?bnhm_id=EMEC344477&one=T	EMEC	EMEC	PreservedSpecimen	EMEC344477	Kipling Will, Frank Hsu, Riva Madan	1	adult	pin	6/10/2015	United States	Nevada	White Pine County	Great Basin National Park, Baker Lake Trail		2370		38.98194	-114.24361	WGS1984	10			Pterostichus protractus LeConte, 1860	Animalia	Arthropoda	Insecta	Coleoptera	Carabidae	Pterostichus	protractus		LeConte, 1860
urn:catalog:EMEC:EMEC:344478	2/14/2016	https://creativecommons.org/publicdomain/zero/1.0/	http://vertnet.org/resources/norms.html	http://essigdb.berkeley.edu/cgi/eme_query?bnhm_id=EMEC344478&one=T	EMEC	EMEC	PreservedSpecimen	EMEC344478	Kipling Will, Frank Hsu, Riva Madan	1	adult	pin	6/10/2015	United States	Nevada	White Pine County	Great Basin National Park, Baker Lake Trail		2370		38.98194	-114.24361	WGS1984	10			Pterostichus protractus LeConte, 1860	Animalia	Arthropoda	Insecta	Coleoptera	Carabidae	Pterostichus	protractus		LeConte, 1860
urn:catalog:EMEC:EMEC:344479	2/14/2016	https://creativecommons.org/publicdomain/zero/1.0/	http://vertnet.org/resources/norms.html	http://essigdb.berkeley.edu/cgi/eme_query?bnhm_id=EMEC344479&one=T	EMEC	EMEC	PreservedSpecimen	EMEC344479	Kipling Will, Frank Hsu, Riva Madan	1	adult	pin	6/10/2015	United States	Nevada	White Pine County	Great Basin National Park, Baker Lake Trail		2370		38.98194	-114.24361	WGS1984	10			Pterostichus protractus LeConte, 1860	Animalia	Arthropoda	Insecta	Coleoptera	Carabidae	Pterostichus	protractus		LeConte, 1860
urn:catalog:EMEC:EMEC:344480		https://creativecommons.org/publicdomain/zero/1.0/	http://vertnet.org/resources/norms.html	http://essigdb.berkeley.edu/cgi/eme_query?bnhm_id=EMEC344480&one=T	EMEC	EMEC	PreservedSpecimen	EMEC344480	Kipling Will, D. R. Maddison, John Sproul	1	adult	pin	6/16/2013	United States	Nevada	Elko County	Ruby Range, Lamoille Canyon		2606		40.6181	-115.3686	WGS1984	10			Pterostichus protractus LeConte, 1860	Animalia	Arthropoda	Insecta	Coleoptera	Carabidae	Pterostichus	protractus		LeConte, 1860
urn:catalog:EMEC:EMEC:344445	9/13/2015	https://creativecommons.org/publicdomain/zero/1.0/	http://vertnet.org/resources/norms.html	http://essigdb.berkeley.edu/cgi/eme_query?bnhm_id=EMEC344445&one=T	EMEC	EMEC	PreservedSpecimen	EMEC344445	Kipling Will	1	adult	pin	6/14/2009	United States	Nevada	Elko County	Ruby Mountains, Lamoille Canyon		2496		40.6425	-115.3753	WGS1984	10			Pterostichus protractus LeConte, 1860	Animalia	Arthropoda	Insecta	Coleoptera	Carabidae	Pterostichus	protractus		LeConte, 1860
urn:catalog:EMEC:EMEC:344481		https://creativecommons.org/publicdomain/zero/1.0/	http://vertnet.org/resources/norms.html	http://essigdb.berkeley.edu/cgi/eme_query?bnhm_id=EMEC344481&one=T	EMEC	EMEC	PreservedSpecimen	EMEC344481	Kipling Will, Rolf Aalbu	1	adult	pin	6/3/2012	United States	Nevada	Lander County	North Fork Big Creek		2535		39.3583	-117.0953	WGS1984	10			Pterostichus protractus LeConte, 1860	Animalia	Arthropoda	Insecta	Coleoptera	Carabidae	Pterostichus	protractus		LeConte, 1860
urn:catalog:EMEC:EMEC:344482		https://creativecommons.org/publicdomain/zero/1.0/	http://vertnet.org/resources/norms.html	http://essigdb.berkeley.edu/cgi/eme_query?bnhm_id=EMEC344482&one=T	EMEC	EMEC	PreservedSpecimen	EMEC344482	Kipling Will, Rolf Aalbu	1	adult	pin	6/3/2012	United States	Nevada	Lander County	North Fork Big Creek		2535		39.3583	-117.0953	WGS1984	10			Pterostichus protractus LeConte, 1860	Animalia	Arthropoda	Insecta	Coleoptera	Carabidae	Pterostichus	protractus		LeConte, 1860
urn:catalog:EMEC:EMEC:344483		https://creativecommons.org/publicdomain/zero/1.0/	http://vertnet.org/resources/norms.html	http://essigdb.berkeley.edu/cgi/eme_query?bnhm_id=EMEC344483&one=T	EMEC	EMEC	PreservedSpecimen	EMEC344483	Kipling Will, D. R. Maddison, John Sproul	1	adult	pin	6/16/2013	United States	Nevada	Elko County	Ruby Range, Lamoille Canyon		2872		40.5947	-115.3833	WGS1984	10			Pterostichus protractus LeConte, 1860	Animalia	Arthropoda	Insecta	Coleoptera	Carabidae	Pterostichus	protractus		LeConte, 1860
urn:catalog:EMEC:EMEC:344484		https://creativecommons.org/publicdomain/zero/1.0/	http://vertnet.org/resources/norms.html	http://essigdb.berkeley.edu/cgi/eme_query?bnhm_id=EMEC344484&one=T	EMEC	EMEC	PreservedSpecimen	EMEC344484	Kipling Will, D. R. Maddison, John Sproul	1	adult	pin	6/16/2013	United States	Nevada	Elko County	Ruby Range, Lamoille Canyon		2872		40.5947	-115.3833	WGS1984	10			Pterostichus protractus LeConte, 1860	Animalia	Arthropoda	Insecta	Coleoptera	Carabidae	Pterostichus	protractus		LeConte, 1860
urn:catalog:EMEC:EMEC:344485		https://creativecommons.org/publicdomain/zero/1.0/	http://vertnet.org/resources/norms.html	http://essigdb.berkeley.edu/cgi/eme_query?bnhm_id=EMEC344485&one=T	EMEC	EMEC	PreservedSpecimen	EMEC344485	Kipling Will, D. R. Maddison, John Sproul	1	adult	pin	6/16/2013	United States	Nevada	Elko County	Ruby Range, Lamoille Canyon		2872		40.5947	-115.3833	WGS1984	10			Pterostichus protractus LeConte, 1860	Animalia	Arthropoda	Insecta	Coleoptera	Carabidae	Pterostichus	protractus		LeConte, 1860
urn:catalog:EMEC:EMEC:344486		https://creativecommons.org/publicdomain/zero/1.0/	http://vertnet.org/resources/norms.html	http://essigdb.berkeley.edu/cgi/eme_query?bnhm_id=EMEC344486&one=T	EMEC	EMEC	PreservedSpecimen	EMEC344486	Kipling Will, D. R. Maddison, John Sproul	1	adult	pin	6/16/2013	United States	Nevada	Elko County	Ruby Range, Lamoille Canyon		2872		40.5947	-115.3833	WGS1984	10			Pterostichus protractus LeConte, 1860	Animalia	Arthropoda	Insecta	Coleoptera	Carabidae	Pterostichus	protractus		LeConte, 1860
urn:catalog:EMEC:EMEC:344487		https://creativecommons.org/publicdomain/zero/1.0/	http://vertnet.org/resources/norms.html	http://essigdb.berkeley.edu/cgi/eme_query?bnhm_id=EMEC344487&one=T	EMEC	EMEC	PreservedSpecimen	EMEC344487	Kipling Will, D. R. Maddison, John Sproul	1	adult	pin	6/16/2013	United States	Nevada	Elko County	Ruby Range, Lamoille Canyon		2872		40.5947	-115.3833	WGS1984	10			Pterostichus protractus LeConte, 1860	Animalia	Arthropoda	Insecta	Coleoptera	Carabidae	Pterostichus	protractus		LeConte, 1860
urn:catalog:EMEC:EMEC:344488		https://creativecommons.org/publicdomain/zero/1.0/	http://vertnet.org/resources/norms.html	http://essigdb.berkeley.edu/cgi/eme_query?bnhm_id=EMEC344488&one=T	EMEC	EMEC	PreservedSpecimen	EMEC344488	Kipling Will, D. R. Maddison, John Sproul	1	adult	pin	6/16/2013	United States	Nevada	Elko County	Ruby Range, Lamoille Canyon		2872		40.5947	-115.3833	WGS1984	10			Pterostichus protractus LeConte, 1860	Animalia	Arthropoda	Insecta	Coleoptera	Carabidae	Pterostichus	protractus		LeConte, 1860
urn:catalog:EMEC:EMEC:344489		https://creativecommons.org/publicdomain/zero/1.0/	http://vertnet.org/resources/norms.html	http://essigdb.berkeley.edu/cgi/eme_query?bnhm_id=EMEC344489&one=T	EMEC	EMEC	PreservedSpecimen	EMEC344489	Kipling Will, Rolf Aalbu	1	adult	pin	6/3/2012	United States	Nevada	Lander County	North Fork Big Creek		2267		39.3453	-117.1061	WGS1984	10			Pterostichus protractus LeConte, 1860	Animalia	Arthropoda	Insecta	Coleoptera	Carabidae	Pterostichus	protractus		LeConte, 1860
urn:catalog:EMEC:EMEC:344490		https://creativecommons.org/publicdomain/zero/1.0/	http://vertnet.org/resources/norms.html	http://essigdb.berkeley.edu/cgi/eme_query?bnhm_id=EMEC344490&one=T	EMEC	EMEC	PreservedSpecimen	EMEC344490	Kipling Will, Rolf Aalbu	1	adult	pin	6/3/2012	United States	Nevada	Lander County	North Fork Big Creek		2267		39.3453	-117.1061	WGS1984	10			Pterostichus protractus LeConte, 1860	Animalia	Arthropoda	Insecta	Coleoptera	Carabidae	Pterostichus	protractus		LeConte, 1860
urn:catalog:EMEC:EMEC:344446	9/13/2015	https://creativecommons.org/publicdomain/zero/1.0/	http://vertnet.org/resources/norms.html	http://essigdb.berkeley.edu/cgi/eme_query?bnhm_id=EMEC344446&one=T	EMEC	EMEC	PreservedSpecimen	EMEC344446	Kipling Will	1	adult	pin	6/14/2009	United States	Nevada	Elko County	Ruby Mountains, Lamoille Canyon		2496		40.6425	-115.3753	WGS1984	10			Pterostichus protractus LeConte, 1860	Animalia	Arthropoda	Insecta	Coleoptera	Carabidae	Pterostichus	protractus		LeConte, 1860
urn:catalog:EMEC:EMEC:344491		https://creativecommons.org/publicdomain/zero/1.0/	http://vertnet.org/resources/norms.html	http://essigdb.berkeley.edu/cgi/eme_query?bnhm_id=EMEC344491&one=T	EMEC	EMEC	PreservedSpecimen	EMEC344491	Kipling Will, Rolf Aalbu	1	adult	pin	6/3/2012	United States	Nevada	Lander County	North Fork Big Creek		2267		39.3453	-117.1061	WGS1984	10			Pterostichus protractus LeConte, 1860	Animalia	Arthropoda	Insecta	Coleoptera	Carabidae	Pterostichus	protractus		LeConte, 1860
urn:catalog:EMEC:EMEC:344492		https://creativecommons.org/publicdomain/zero/1.0/	http://vertnet.org/resources/norms.html	http://essigdb.berkeley.edu/cgi/eme_query?bnhm_id=EMEC344492&one=T	EMEC	EMEC	PreservedSpecimen	EMEC344492	Kipling Will, Rolf Aalbu	1	adult	pin	6/3/2012	United States	Nevada	Lander County	North Fork Big Creek		2267		39.3453	-117.1061	WGS1984	10			Pterostichus protractus LeConte, 1860	Animalia	Arthropoda	Insecta	Coleoptera	Carabidae	Pterostichus	protractus		LeConte, 1860
urn:catalog:EMEC:EMEC:344493		https://creativecommons.org/publicdomain/zero/1.0/	http://vertnet.org/resources/norms.html	http://essigdb.berkeley.edu/cgi/eme_query?bnhm_id=EMEC344493&one=T	EMEC	EMEC	PreservedSpecimen	EMEC344493	Kipling Will, Rolf Aalbu	1	adult	pin	6/3/2012	United States	Nevada	Lander County	North Fork Big Creek		2267		39.3453	-117.1061	WGS1984	10			Pterostichus protractus LeConte, 1860	Animalia	Arthropoda	Insecta	Coleoptera	Carabidae	Pterostichus	protractus		LeConte, 1860
urn:catalog:EMEC:EMEC:344494		https://creativecommons.org/publicdomain/zero/1.0/	http://vertnet.org/resources/norms.html	http://essigdb.berkeley.edu/cgi/eme_query?bnhm_id=EMEC344494&one=T	EMEC	EMEC	PreservedSpecimen	EMEC344494	Kipling Will, Rolf Aalbu	1	adult	pin	6/3/2012	United States	Nevada	Lander County	North Fork Big Creek		2267		39.3453	-117.1061	WGS1984	10			Pterostichus protractus LeConte, 1860	Animalia	Arthropoda	Insecta	Coleoptera	Carabidae	Pterostichus	protractus		LeConte, 1860
urn:catalog:EMEC:EMEC:344495		https://creativecommons.org/publicdomain/zero/1.0/	http://vertnet.org/resources/norms.html	http://essigdb.berkeley.edu/cgi/eme_query?bnhm_id=EMEC344495&one=T	EMEC	EMEC	PreservedSpecimen	EMEC344495	Kipling Will, Rolf Aalbu	1	adult	pin	6/3/2012	United States	Nevada	Lander County	North Fork Big Creek		2267		39.3453	-117.1061	WGS1984	10			Pterostichus protractus LeConte, 1860	Animalia	Arthropoda	Insecta	Coleoptera	Carabidae	Pterostichus	protractus		LeConte, 1860
urn:catalog:EMEC:EMEC:344496		https://creativecommons.org/publicdomain/zero/1.0/	http://vertnet.org/resources/norms.html	http://essigdb.berkeley.edu/cgi/eme_query?bnhm_id=EMEC344496&one=T	EMEC	EMEC	PreservedSpecimen	EMEC344496	Kipling Will, Rolf Aalbu	1	adult	pin	6/3/2012	United States	Nevada	Lander County	North Fork Big Creek		2267		39.3453	-117.1061	WGS1984	10			Pterostichus protractus LeConte, 1860	Animalia	Arthropoda	Insecta	Coleoptera	Carabidae	Pterostichus	protractus		LeConte, 1860
urn:catalog:EMEC:EMEC:344497		https://creativecommons.org/publicdomain/zero/1.0/	http://vertnet.org/resources/norms.html	http://essigdb.berkeley.edu/cgi/eme_query?bnhm_id=EMEC344497&one=T	EMEC	EMEC	PreservedSpecimen	EMEC344497	Kipling Will, Rolf Aalbu	1	adult	pin	6/3/2012	United States	Nevada	Lander County	North Fork Big Creek		2267		39.3453	-117.1061	WGS1984	10			Pterostichus protractus LeConte, 1860	Animalia	Arthropoda	Insecta	Coleoptera	Carabidae	Pterostichus	protractus		LeConte, 1860
urn:catalog:EMEC:EMEC:344498		https://creativecommons.org/publicdomain/zero/1.0/	http://vertnet.org/resources/norms.html	http://essigdb.berkeley.edu/cgi/eme_query?bnhm_id=EMEC344498&one=T	EMEC	EMEC	PreservedSpecimen	EMEC344498	Kipling Will, Rolf Aalbu	1	adult	pin	6/3/2012	United States	Nevada	Lander County	North Fork Big Creek		2267		39.3453	-117.1061	WGS1984	10			Pterostichus protractus LeConte, 1860	Animalia	Arthropoda	Insecta	Coleoptera	Carabidae	Pterostichus	protractus		LeConte, 1860
urn:catalog:EMEC:EMEC:344499		https://creativecommons.org/publicdomain/zero/1.0/	http://vertnet.org/resources/norms.html	http://essigdb.berkeley.edu/cgi/eme_query?bnhm_id=EMEC344499&one=T	EMEC	EMEC	PreservedSpecimen	EMEC344499	Kipling Will, Rolf Aalbu	1	adult	pin	6/3/2012	United States	Nevada	Lander County	North Fork Big Creek		2267		39.3453	-117.1061	WGS1984	10			Pterostichus protractus LeConte, 1860	Animalia	Arthropoda	Insecta	Coleoptera	Carabidae	Pterostichus	protractus		LeConte, 1860
urn:catalog:EMEC:EMEC:344500		https://creativecommons.org/publicdomain/zero/1.0/	http://vertnet.org/resources/norms.html	http://essigdb.berkeley.edu/cgi/eme_query?bnhm_id=EMEC344500&one=T	EMEC	EMEC	PreservedSpecimen	EMEC344500	Kipling Will, Rolf Aalbu	1	adult	pin	6/3/2012	United States	Nevada	Lander County	North Fork Big Creek		2267		39.3453	-117.1061	WGS1984	10			Pterostichus protractus LeConte, 1860	Animalia	Arthropoda	Insecta	Coleoptera	Carabidae	Pterostichus	protractus		LeConte, 1860
urn:catalog:EMEC:EMEC:344447	9/13/2015	https://creativecommons.org/publicdomain/zero/1.0/	http://vertnet.org/resources/norms.html	http://essigdb.berkeley.edu/cgi/eme_query?bnhm_id=EMEC344447&one=T	EMEC	EMEC	PreservedSpecimen	EMEC344447	Kipling Will	1	adult	pin	6/14/2009	United States	Nevada	Elko County	Ruby Mountains, Lamoille Canyon		2496		40.6425	-115.3753	WGS1984	10			Pterostichus protractus LeConte, 1860	Animalia	Arthropoda	Insecta	Coleoptera	Carabidae	Pterostichus	protractus		LeConte, 1860
urn:catalog:EMEC:EMEC:344501		https://creativecommons.org/publicdomain/zero/1.0/	http://vertnet.org/resources/norms.html	http://essigdb.berkeley.edu/cgi/eme_query?bnhm_id=EMEC344501&one=T	EMEC	EMEC	PreservedSpecimen	EMEC344501	Kipling Will, Rolf Aalbu	1	adult	pin	6/3/2012	United States	Nevada	Lander County	North Fork Big Creek		2267		39.3453	-117.1061	WGS1984	10			Pterostichus protractus LeConte, 1860	Animalia	Arthropoda	Insecta	Coleoptera	Carabidae	Pterostichus	protractus		LeConte, 1860
urn:catalog:EMEC:EMEC:344502		https://creativecommons.org/publicdomain/zero/1.0/	http://vertnet.org/resources/norms.html	http://essigdb.berkeley.edu/cgi/eme_query?bnhm_id=EMEC344502&one=T	EMEC	EMEC	PreservedSpecimen	EMEC344502	Kipling Will, Rolf Aalbu	1	adult	pin	6/3/2012	United States	Nevada	Lander County	North Fork Big Creek		2267		39.3453	-117.1061	WGS1984	10			Pterostichus protractus LeConte, 1860	Animalia	Arthropoda	Insecta	Coleoptera	Carabidae	Pterostichus	protractus		LeConte, 1860
urn:catalog:EMEC:EMEC:344503		https://creativecommons.org/publicdomain/zero/1.0/	http://vertnet.org/resources/norms.html	http://essigdb.berkeley.edu/cgi/eme_query?bnhm_id=EMEC344503&one=T	EMEC	EMEC	PreservedSpecimen	EMEC344503	Kipling Will, Rolf Aalbu	1	adult	pin	6/4/2012	United States	Nevada	Lander County	North Fork Big Creek		2335		39.3583	-117.0953	WGS1984	10			Pterostichus protractus LeConte, 1860	Animalia	Arthropoda	Insecta	Coleoptera	Carabidae	Pterostichus	protractus		LeConte, 1860
urn:catalog:EMEC:EMEC:344504		https://creativecommons.org/publicdomain/zero/1.0/	http://vertnet.org/resources/norms.html	http://essigdb.berkeley.edu/cgi/eme_query?bnhm_id=EMEC344504&one=T	EMEC	EMEC	PreservedSpecimen	EMEC344504	Kipling Will, Rolf Aalbu	1	adult	pin	6/4/2012	United States	Nevada	Lander County	North Fork Big Creek		2335		39.3583	-117.0953	WGS1984	10			Pterostichus protractus LeConte, 1860	Animalia	Arthropoda	Insecta	Coleoptera	Carabidae	Pterostichus	protractus		LeConte, 1860
urn:catalog:EMEC:EMEC:344505		https://creativecommons.org/publicdomain/zero/1.0/	http://vertnet.org/resources/norms.html	http://essigdb.berkeley.edu/cgi/eme_query?bnhm_id=EMEC344505&one=T	EMEC	EMEC	PreservedSpecimen	EMEC344505	Kipling Will, Rolf Aalbu	1	adult	pin	6/4/2012	United States	Nevada	Lander County	North Fork Big Creek		2335		39.3583	-117.0953	WGS1984	10			Pterostichus protractus LeConte, 1860	Animalia	Arthropoda	Insecta	Coleoptera	Carabidae	Pterostichus	protractus		LeConte, 1860
urn:catalog:EMEC:EMEC:344506		https://creativecommons.org/publicdomain/zero/1.0/	http://vertnet.org/resources/norms.html	http://essigdb.berkeley.edu/cgi/eme_query?bnhm_id=EMEC344506&one=T	EMEC	EMEC	PreservedSpecimen	EMEC344506	Kipling Will, Rolf Aalbu	1	adult	pin	6/4/2012	United States	Nevada	Lander County	North Fork Big Creek		2335		39.3583	-117.0953	WGS1984	10			Pterostichus protractus LeConte, 1860	Animalia	Arthropoda	Insecta	Coleoptera	Carabidae	Pterostichus	protractus		LeConte, 1860
urn:catalog:EMEC:EMEC:344507		https://creativecommons.org/publicdomain/zero/1.0/	http://vertnet.org/resources/norms.html	http://essigdb.berkeley.edu/cgi/eme_query?bnhm_id=EMEC344507&one=T	EMEC	EMEC	PreservedSpecimen	EMEC344507	Kipling Will, Rolf Aalbu	1	adult	pin	6/4/2012	United States	Nevada	Lander County	North Fork Big Creek		2335		39.3583	-117.0953	WGS1984	10			Pterostichus protractus LeConte, 1860	Animalia	Arthropoda	Insecta	Coleoptera	Carabidae	Pterostichus	protractus		LeConte, 1860
urn:catalog:EMEC:EMEC:344508		https://creativecommons.org/publicdomain/zero/1.0/	http://vertnet.org/resources/norms.html	http://essigdb.berkeley.edu/cgi/eme_query?bnhm_id=EMEC344508&one=T	EMEC	EMEC	PreservedSpecimen	EMEC344508	Kipling Will, Rolf Aalbu	1	adult	pin	6/4/2012	United States	Nevada	Lander County	North Fork Big Creek		2335		39.3583	-117.0953	WGS1984	10			Pterostichus protractus LeConte, 1860	Animalia	Arthropoda	Insecta	Coleoptera	Carabidae	Pterostichus	protractus		LeConte, 1860
urn:catalog:EMEC:EMEC:344509		https://creativecommons.org/publicdomain/zero/1.0/	http://vertnet.org/resources/norms.html	http://essigdb.berkeley.edu/cgi/eme_query?bnhm_id=EMEC344509&one=T	EMEC	EMEC	PreservedSpecimen	EMEC344509	Kipling Will, Rolf Aalbu	1	adult	pin	6/4/2012	United States	Nevada	Lander County	North Fork Big Creek		2335		39.3583	-117.0953	WGS1984	10			Pterostichus protractus LeConte, 1860	Animalia	Arthropoda	Insecta	Coleoptera	Carabidae	Pterostichus	protractus		LeConte, 1860
urn:catalog:EMEC:EMEC:344510		https://creativecommons.org/publicdomain/zero/1.0/	http://vertnet.org/resources/norms.html	http://essigdb.berkeley.edu/cgi/eme_query?bnhm_id=EMEC344510&one=T	EMEC	EMEC	PreservedSpecimen	EMEC344510	Kipling Will, Rolf Aalbu	1	adult	pin	6/4/2012	United States	Nevada	Lander County	North Fork Big Creek		2335		39.3583	-117.0953	WGS1984	10			Pterostichus protractus LeConte, 1860	Animalia	Arthropoda	Insecta	Coleoptera	Carabidae	Pterostichus	protractus		LeConte, 1860
urn:catalog:EMEC:EMEC:344448	9/13/2015	https://creativecommons.org/publicdomain/zero/1.0/	http://vertnet.org/resources/norms.html	http://essigdb.berkeley.edu/cgi/eme_query?bnhm_id=EMEC344448&one=T	EMEC	EMEC	PreservedSpecimen	EMEC344448	Kipling Will	1	adult	pin	6/14/2009	United States	Nevada	Elko County	Ruby Mountains, Lamoille Canyon		2496		40.6425	-115.3753	WGS1984	10			Pterostichus protractus LeConte, 1860	Animalia	Arthropoda	Insecta	Coleoptera	Carabidae	Pterostichus	protractus		LeConte, 1860
urn:catalog:EMEC:EMEC:344511		https://creativecommons.org/publicdomain/zero/1.0/	http://vertnet.org/resources/norms.html	http://essigdb.berkeley.edu/cgi/eme_query?bnhm_id=EMEC344511&one=T	EMEC	EMEC	PreservedSpecimen	EMEC344511	Kipling Will, Rolf Aalbu	1	adult	pin	6/4/2012	United States	Nevada	Lander County	North Fork Big Creek		2335		39.3583	-117.0953	WGS1984	10			Pterostichus protractus LeConte, 1860	Animalia	Arthropoda	Insecta	Coleoptera	Carabidae	Pterostichus	protractus		LeConte, 1860
urn:catalog:EMEC:EMEC:344512		https://creativecommons.org/publicdomain/zero/1.0/	http://vertnet.org/resources/norms.html	http://essigdb.berkeley.edu/cgi/eme_query?bnhm_id=EMEC344512&one=T	EMEC	EMEC	PreservedSpecimen	EMEC344512	Kipling Will, Rolf Aalbu	1	adult	pin	6/4/2012	United States	Nevada	Lander County	North Fork Big Creek		2335		39.3583	-117.0953	WGS1984	10			Pterostichus protractus LeConte, 1860	Animalia	Arthropoda	Insecta	Coleoptera	Carabidae	Pterostichus	protractus		LeConte, 1860
urn:catalog:EMEC:EMEC:344513		https://creativecommons.org/publicdomain/zero/1.0/	http://vertnet.org/resources/norms.html	http://essigdb.berkeley.edu/cgi/eme_query?bnhm_id=EMEC344513&one=T	EMEC	EMEC	PreservedSpecimen	EMEC344513	Kipling Will, Rolf Aalbu	1	adult	pin	6/4/2012	United States	Nevada	Lander County	North Fork Big Creek		2335		39.3583	-117.0953	WGS1984	10			Pterostichus protractus LeConte, 1860	Animalia	Arthropoda	Insecta	Coleoptera	Carabidae	Pterostichus	protractus		LeConte, 1860
urn:catalog:EMEC:EMEC:344514		https://creativecommons.org/publicdomain/zero/1.0/	http://vertnet.org/resources/norms.html	http://essigdb.berkeley.edu/cgi/eme_query?bnhm_id=EMEC344514&one=T	EMEC	EMEC	PreservedSpecimen	EMEC344514	Kipling Will, Rolf Aalbu	1	adult	pin	6/4/2012	United States	Nevada	Lander County	North Fork Big Creek		2335		39.3583	-117.0953	WGS1984	10			Pterostichus protractus LeConte, 1860	Animalia	Arthropoda	Insecta	Coleoptera	Carabidae	Pterostichus	protractus		LeConte, 1860
urn:catalog:EMEC:EMEC:344515		https://creativecommons.org/publicdomain/zero/1.0/	http://vertnet.org/resources/norms.html	http://essigdb.berkeley.edu/cgi/eme_query?bnhm_id=EMEC344515&one=T	EMEC	EMEC	PreservedSpecimen	EMEC344515	Kipling Will, Rolf Aalbu	1	adult	pin	6/4/2012	United States	Nevada	Lander County	North Fork Big Creek		2335		39.3583	-117.0953	WGS1984	10			Pterostichus protractus LeConte, 1860	Animalia	Arthropoda	Insecta	Coleoptera	Carabidae	Pterostichus	protractus		LeConte, 1860
urn:catalog:EMEC:EMEC:344516		https://creativecommons.org/publicdomain/zero/1.0/	http://vertnet.org/resources/norms.html	http://essigdb.berkeley.edu/cgi/eme_query?bnhm_id=EMEC344516&one=T	EMEC	EMEC	PreservedSpecimen	EMEC344516	Kipling Will, Rolf Aalbu	1	adult	pin	6/4/2012	United States	Nevada	Lander County	North Fork Big Creek		2335		39.3583	-117.0953	WGS1984	10			Pterostichus protractus LeConte, 1860	Animalia	Arthropoda	Insecta	Coleoptera	Carabidae	Pterostichus	protractus		LeConte, 1860
urn:catalog:EMEC:EMEC:344517		https://creativecommons.org/publicdomain/zero/1.0/	http://vertnet.org/resources/norms.html	http://essigdb.berkeley.edu/cgi/eme_query?bnhm_id=EMEC344517&one=T	EMEC	EMEC	PreservedSpecimen	EMEC344517	Kipling Will, Rolf Aalbu	1	adult	pin	6/4/2012	United States	Nevada	Lander County	North Fork Big Creek		2335		39.3583	-117.0953	WGS1984	10			Pterostichus protractus LeConte, 1860	Animalia	Arthropoda	Insecta	Coleoptera	Carabidae	Pterostichus	protractus		LeConte, 1860
urn:catalog:EMEC:EMEC:344518		https://creativecommons.org/publicdomain/zero/1.0/	http://vertnet.org/resources/norms.html	http://essigdb.berkeley.edu/cgi/eme_query?bnhm_id=EMEC344518&one=T	EMEC	EMEC	PreservedSpecimen	EMEC344518	Kipling Will, Rolf Aalbu	1	adult	pin	6/4/2012	United States	Nevada	Lander County	North Fork Big Creek		2335		39.3583	-117.0953	WGS1984	10			Pterostichus protractus LeConte, 1860	Animalia	Arthropoda	Insecta	Coleoptera	Carabidae	Pterostichus	protractus		LeConte, 1860
urn:catalog:EMEC:EMEC:344519		https://creativecommons.org/publicdomain/zero/1.0/	http://vertnet.org/resources/norms.html	http://essigdb.berkeley.edu/cgi/eme_query?bnhm_id=EMEC344519&one=T	EMEC	EMEC	PreservedSpecimen	EMEC344519	Kipling Will, Rolf Aalbu	1	adult	pin	6/4/2012	United States	Nevada	Lander County	North Fork Big Creek		2335		39.3583	-117.0953	WGS1984	10			Pterostichus protractus LeConte, 1860	Animalia	Arthropoda	Insecta	Coleoptera	Carabidae	Pterostichus	protractus		LeConte, 1860
urn:catalog:EMEC:EMEC:344520		https://creativecommons.org/publicdomain/zero/1.0/	http://vertnet.org/resources/norms.html	http://essigdb.berkeley.edu/cgi/eme_query?bnhm_id=EMEC344520&one=T	EMEC	EMEC	PreservedSpecimen	EMEC344520	Kipling Will, Rolf Aalbu	1	adult	pin	6/4/2012	United States	Nevada	Lander County	North Fork Big Creek		2335		39.3583	-117.0953	WGS1984	10			Pterostichus protractus LeConte, 1860	Animalia	Arthropoda	Insecta	Coleoptera	Carabidae	Pterostichus	protractus		LeConte, 1860
urn:catalog:EMEC:EMEC:344449	9/13/2015	https://creativecommons.org/publicdomain/zero/1.0/	http://vertnet.org/resources/norms.html	http://essigdb.berkeley.edu/cgi/eme_query?bnhm_id=EMEC344449&one=T	EMEC	EMEC	PreservedSpecimen	EMEC344449	Kipling Will	1	adult	pin	6/14/2009	United States	Nevada	Elko County	Ruby Mountains, Lamoille Canyon		2496		40.6425	-115.3753	WGS1984	10			Pterostichus protractus LeConte, 1860	Animalia	Arthropoda	Insecta	Coleoptera	Carabidae	Pterostichus	protractus		LeConte, 1860
urn:catalog:EMEC:EMEC:344521		https://creativecommons.org/publicdomain/zero/1.0/	http://vertnet.org/resources/norms.html	http://essigdb.berkeley.edu/cgi/eme_query?bnhm_id=EMEC344521&one=T	EMEC	EMEC	PreservedSpecimen	EMEC344521	Kipling Will, Rolf Aalbu	1	adult	pin	6/4/2012	United States	Nevada	Lander County	North Fork Big Creek		2335		39.3583	-117.0953	WGS1984	10			Pterostichus protractus LeConte, 1860	Animalia	Arthropoda	Insecta	Coleoptera	Carabidae	Pterostichus	protractus		LeConte, 1860
urn:catalog:EMEC:EMEC:344522		https://creativecommons.org/publicdomain/zero/1.0/	http://vertnet.org/resources/norms.html	http://essigdb.berkeley.edu/cgi/eme_query?bnhm_id=EMEC344522&one=T	EMEC	EMEC	PreservedSpecimen	EMEC344522	Kipling Will, Rolf Aalbu	1	adult	pin	6/4/2012	United States	Nevada	Lander County	North Fork Big Creek		2335		39.3583	-117.0953	WGS1984	10			Pterostichus protractus LeConte, 1860	Animalia	Arthropoda	Insecta	Coleoptera	Carabidae	Pterostichus	protractus		LeConte, 1860
urn:catalog:EMEC:EMEC:344523		https://creativecommons.org/publicdomain/zero/1.0/	http://vertnet.org/resources/norms.html	http://essigdb.berkeley.edu/cgi/eme_query?bnhm_id=EMEC344523&one=T	EMEC	EMEC	PreservedSpecimen	EMEC344523	Kipling Will, Rolf Aalbu	1	adult	pin	6/4/2012	United States	Nevada	Lander County	North Fork Big Creek		2335		39.3583	-117.0953	WGS1984	10			Pterostichus protractus LeConte, 1860	Animalia	Arthropoda	Insecta	Coleoptera	Carabidae	Pterostichus	protractus		LeConte, 1860
urn:catalog:EMEC:EMEC:344524		https://creativecommons.org/publicdomain/zero/1.0/	http://vertnet.org/resources/norms.html	http://essigdb.berkeley.edu/cgi/eme_query?bnhm_id=EMEC344524&one=T	EMEC	EMEC	PreservedSpecimen	EMEC344524	Kipling Will, Rolf Aalbu	1	adult	pin	6/4/2012	United States	Nevada	Lander County	North Fork Big Creek		2335		39.3583	-117.0953	WGS1984	10			Pterostichus protractus LeConte, 1860	Animalia	Arthropoda	Insecta	Coleoptera	Carabidae	Pterostichus	protractus		LeConte, 1860
urn:catalog:EMEC:EMEC:344525		https://creativecommons.org/publicdomain/zero/1.0/	http://vertnet.org/resources/norms.html	http://essigdb.berkeley.edu/cgi/eme_query?bnhm_id=EMEC344525&one=T	EMEC	EMEC	PreservedSpecimen	EMEC344525	Kipling Will, Rolf Aalbu	1	adult	pin	6/4/2012	United States	Nevada	Lander County	North Fork Big Creek		2335		39.3583	-117.0953	WGS1984	10			Pterostichus protractus LeConte, 1860	Animalia	Arthropoda	Insecta	Coleoptera	Carabidae	Pterostichus	protractus		LeConte, 1860
urn:catalog:EMEC:EMEC:344526		https://creativecommons.org/publicdomain/zero/1.0/	http://vertnet.org/resources/norms.html	http://essigdb.berkeley.edu/cgi/eme_query?bnhm_id=EMEC344526&one=T	EMEC	EMEC	PreservedSpecimen	EMEC344526	Kipling Will, Rolf Aalbu	1	adult	pin	6/4/2012	United States	Nevada	Lander County	North Fork Big Creek		2335		39.3583	-117.0953	WGS1984	10			Pterostichus protractus LeConte, 1860	Animalia	Arthropoda	Insecta	Coleoptera	Carabidae	Pterostichus	protractus		LeConte, 1860
urn:catalog:EMEC:EMEC:344527		https://creativecommons.org/publicdomain/zero/1.0/	http://vertnet.org/resources/norms.html	http://essigdb.berkeley.edu/cgi/eme_query?bnhm_id=EMEC344527&one=T	EMEC	EMEC	PreservedSpecimen	EMEC344527	Kipling Will, Rolf Aalbu	1	adult	pin	6/4/2012	United States	Nevada	Lander County	North Fork Big Creek		2335		39.3583	-117.0953	WGS1984	10			Pterostichus protractus LeConte, 1860	Animalia	Arthropoda	Insecta	Coleoptera	Carabidae	Pterostichus	protractus		LeConte, 1860
urn:catalog:EMEC:EMEC:344528		https://creativecommons.org/publicdomain/zero/1.0/	http://vertnet.org/resources/norms.html	http://essigdb.berkeley.edu/cgi/eme_query?bnhm_id=EMEC344528&one=T	EMEC	EMEC	PreservedSpecimen	EMEC344528	Kipling Will, Rolf Aalbu	1	adult	pin	6/4/2012	United States	Nevada	Lander County	North Fork Big Creek		2335		39.3583	-117.0953	WGS1984	10			Pterostichus protractus LeConte, 1860	Animalia	Arthropoda	Insecta	Coleoptera	Carabidae	Pterostichus	protractus		LeConte, 1860
urn:catalog:EMEC:EMEC:344529		https://creativecommons.org/publicdomain/zero/1.0/	http://vertnet.org/resources/norms.html	http://essigdb.berkeley.edu/cgi/eme_query?bnhm_id=EMEC344529&one=T	EMEC	EMEC	PreservedSpecimen	EMEC344529	Kipling Will, Rolf Aalbu	1	adult	pin	6/4/2012	United States	Nevada	Lander County	North Fork Big Creek		2335		39.3583	-117.0953	WGS1984	10			Pterostichus protractus LeConte, 1860	Animalia	Arthropoda	Insecta	Coleoptera	Carabidae	Pterostichus	protractus		LeConte, 1860
urn:catalog:EMEC:EMEC:344530		https://creativecommons.org/publicdomain/zero/1.0/	http://vertnet.org/resources/norms.html	http://essigdb.berkeley.edu/cgi/eme_query?bnhm_id=EMEC344530&one=T	EMEC	EMEC	PreservedSpecimen	EMEC344530	Kipling Will, Rolf Aalbu	1	adult	pin	6/4/2012	United States	Nevada	Lander County	North Fork Big Creek		2335		39.3583	-117.0953	WGS1984	10			Pterostichus protractus LeConte, 1860	Animalia	Arthropoda	Insecta	Coleoptera	Carabidae	Pterostichus	protractus		LeConte, 1860
urn:catalog:EMEC:EMEC:344450	9/13/2015	https://creativecommons.org/publicdomain/zero/1.0/	http://vertnet.org/resources/norms.html	http://essigdb.berkeley.edu/cgi/eme_query?bnhm_id=EMEC344450&one=T	EMEC	EMEC	PreservedSpecimen	EMEC344450	Kipling Will	1	adult	pin	6/14/2009	United States	Nevada	Elko County	Ruby Mountains, Lamoille Canyon		2496		40.6425	-115.3753	WGS1984	10			Pterostichus protractus LeConte, 1860	Animalia	Arthropoda	Insecta	Coleoptera	Carabidae	Pterostichus	protractus		LeConte, 1860
urn:catalog:EMEC:EMEC:344531		https://creativecommons.org/publicdomain/zero/1.0/	http://vertnet.org/resources/norms.html	http://essigdb.berkeley.edu/cgi/eme_query?bnhm_id=EMEC344531&one=T	EMEC	EMEC	PreservedSpecimen	EMEC344531	Kipling Will, Rolf Aalbu	1	adult	pin	6/4/2012	United States	Nevada	Lander County	North Fork Big Creek		2335		39.3583	-117.0953	WGS1984	10			Pterostichus protractus LeConte, 1860	Animalia	Arthropoda	Insecta	Coleoptera	Carabidae	Pterostichus	protractus		LeConte, 1860
urn:catalog:EMEC:EMEC:344532		https://creativecommons.org/publicdomain/zero/1.0/	http://vertnet.org/resources/norms.html	http://essigdb.berkeley.edu/cgi/eme_query?bnhm_id=EMEC344532&one=T	EMEC	EMEC	PreservedSpecimen	EMEC344532	Kipling Will, Rolf Aalbu	1	adult	pin	6/4/2012	United States	Nevada	Lander County	North Fork Big Creek		2335		39.3583	-117.0953	WGS1984	10			Pterostichus protractus LeConte, 1860	Animalia	Arthropoda	Insecta	Coleoptera	Carabidae	Pterostichus	protractus		LeConte, 1860
urn:catalog:EMEC:EMEC:344533		https://creativecommons.org/publicdomain/zero/1.0/	http://vertnet.org/resources/norms.html	http://essigdb.berkeley.edu/cgi/eme_query?bnhm_id=EMEC344533&one=T	EMEC	EMEC	PreservedSpecimen	EMEC344533	Kipling Will, Rolf Aalbu	1	adult	pin	6/4/2012	United States	Nevada	Lander County	North Fork Big Creek		2335		39.3583	-117.0953	WGS1984	10			Pterostichus protractus LeConte, 1860	Animalia	Arthropoda	Insecta	Coleoptera	Carabidae	Pterostichus	protractus		LeConte, 1860
urn:catalog:EMEC:EMEC:344534		https://creativecommons.org/publicdomain/zero/1.0/	http://vertnet.org/resources/norms.html	http://essigdb.berkeley.edu/cgi/eme_query?bnhm_id=EMEC344534&one=T	EMEC	EMEC	PreservedSpecimen	EMEC344534	Kipling Will, Rolf Aalbu	1	adult	pin	6/4/2012	United States	Nevada	Lander County	North Fork Big Creek		2335		39.3583	-117.0953	WGS1984	10			Pterostichus protractus LeConte, 1860	Animalia	Arthropoda	Insecta	Coleoptera	Carabidae	Pterostichus	protractus		LeConte, 1860
urn:catalog:EMEC:EMEC:344535		https://creativecommons.org/publicdomain/zero/1.0/	http://vertnet.org/resources/norms.html	http://essigdb.berkeley.edu/cgi/eme_query?bnhm_id=EMEC344535&one=T	EMEC	EMEC	PreservedSpecimen	EMEC344535	Kipling Will, Rolf Aalbu	1	adult	pin	6/4/2012	United States	Nevada	Lander County	North Fork Big Creek		2335		39.3583	-117.0953	WGS1984	10			Pterostichus protractus LeConte, 1860	Animalia	Arthropoda	Insecta	Coleoptera	Carabidae	Pterostichus	protractus		LeConte, 1860
urn:catalog:EMEC:EMEC:344536		https://creativecommons.org/publicdomain/zero/1.0/	http://vertnet.org/resources/norms.html	http://essigdb.berkeley.edu/cgi/eme_query?bnhm_id=EMEC344536&one=T	EMEC	EMEC	PreservedSpecimen	EMEC344536	Kipling Will, Rolf Aalbu	1	adult	pin	6/4/2012	United States	Nevada	Lander County	North Fork Big Creek		2335		39.3583	-117.0953	WGS1984	10			Pterostichus protractus LeConte, 1860	Animalia	Arthropoda	Insecta	Coleoptera	Carabidae	Pterostichus	protractus		LeConte, 1860
urn:catalog:EMEC:EMEC:344537		https://creativecommons.org/publicdomain/zero/1.0/	http://vertnet.org/resources/norms.html	http://essigdb.berkeley.edu/cgi/eme_query?bnhm_id=EMEC344537&one=T	EMEC	EMEC	PreservedSpecimen	EMEC344537	Kipling Will, Rolf Aalbu	1	adult	pin	6/4/2012	United States	Nevada	Lander County	North Fork Big Creek		2335		39.3583	-117.0953	WGS1984	10			Pterostichus protractus LeConte, 1860	Animalia	Arthropoda	Insecta	Coleoptera	Carabidae	Pterostichus	protractus		LeConte, 1860
urn:catalog:EMEC:EMEC:344538		https://creativecommons.org/publicdomain/zero/1.0/	http://vertnet.org/resources/norms.html	http://essigdb.berkeley.edu/cgi/eme_query?bnhm_id=EMEC344538&one=T	EMEC	EMEC	PreservedSpecimen	EMEC344538	Kipling Will, Rolf Aalbu	1	adult	pin	6/4/2012	United States	Nevada	Lander County	North Fork Big Creek		2335		39.3583	-117.0953	WGS1984	10			Pterostichus protractus LeConte, 1860	Animalia	Arthropoda	Insecta	Coleoptera	Carabidae	Pterostichus	protractus		LeConte, 1860
urn:catalog:EMEC:EMEC:344539		https://creativecommons.org/publicdomain/zero/1.0/	http://vertnet.org/resources/norms.html	http://essigdb.berkeley.edu/cgi/eme_query?bnhm_id=EMEC344539&one=T	EMEC	EMEC	PreservedSpecimen	EMEC344539	Kipling Will, Rolf Aalbu	1	adult	pin	6/4/2012	United States	Nevada	Lander County	North Fork Big Creek		2335		39.3583	-117.0953	WGS1984	10			Pterostichus protractus LeConte, 1860	Animalia	Arthropoda	Insecta	Coleoptera	Carabidae	Pterostichus	protractus		LeConte, 1860
urn:catalog:EMEC:EMEC:344540		https://creativecommons.org/publicdomain/zero/1.0/	http://vertnet.org/resources/norms.html	http://essigdb.berkeley.edu/cgi/eme_query?bnhm_id=EMEC344540&one=T	EMEC	EMEC	PreservedSpecimen	EMEC344540	Kipling Will, Rolf Aalbu	1	adult	pin	6/4/2012	United States	Nevada	Lander County	North Fork Big Creek		2335		39.3583	-117.0953	WGS1984	10			Pterostichus protractus LeConte, 1860	Animalia	Arthropoda	Insecta	Coleoptera	Carabidae	Pterostichus	protractus		LeConte, 1860
urn:catalog:EMEC:EMEC:208885	12/20/2016	https://creativecommons.org/publicdomain/zero/1.0/	http://vertnet.org/resources/norms.html	http://essigdb.berkeley.edu/cgi/eme_query?bnhm_id=EMEC208885&one=T	EMEC	EMEC	PreservedSpecimen	EMEC208885	B Ainsworth, M Coulter, C Fisher	1	adult	pin	9/12/2009	United States	Nevada	White Pine County	Great Basin National Park, Bristlecone Pine Trail	10050\'	10050		39.00384	-114.30446	WGS1984	500			Pterostichus protractus LeConte, 1860	Animalia	Arthropoda	Insecta	Coleoptera	Carabidae	Pterostichus	protractus		LeConte, 1860
urn:catalog:EMEC:EMEC:208887	12/21/2016	https://creativecommons.org/publicdomain/zero/1.0/	http://vertnet.org/resources/norms.html	http://essigdb.berkeley.edu/cgi/eme_query?bnhm_id=EMEC208887&one=T	EMEC	EMEC	PreservedSpecimen	EMEC208887	M. Queery, Z Josey, L Hildreth	1	adult	pin	9/12/2009	United States	Nevada	White Pine County	Wheeler Campground	9980\'	3042		39.01068	-114.3024	WGS1984	500			Pterostichus protractus LeConte, 1860	Animalia	Arthropoda	Insecta	Coleoptera	Carabidae	Pterostichus	protractus		LeConte, 1860
urn:catalog:EMEC:EMEC:208886	12/22/2016	https://creativecommons.org/publicdomain/zero/1.0/	http://vertnet.org/resources/norms.html	http://essigdb.berkeley.edu/cgi/eme_query?bnhm_id=EMEC208886&one=T	EMEC	EMEC	PreservedSpecimen	EMEC208886	D. Sainsbury, K. Bowers, C. Damas	1	adult	pin	9/12/2009	United States	Nevada	White Pine County	Summit Trailhead	>1000\'	10000		39.00981	-114.30794	WGS1984	1000			Pterostichus protractus LeConte, 1860	Animalia	Arthropoda	Insecta	Coleoptera	Carabidae	Pterostichus	protractus		LeConte, 1860
urn:catalog:CAS:ENT:8302839	4/5/2016	https://creativecommons.org/publicdomain/zero/1.0/	http://vertnet.org/resources/norms.html	http://essigdb.berkeley.edu/cgi/eme_query?bnhm_id=CASENT8302839&one=T	CAS	ENT	PreservedSpecimen	CASENT8302839	J.F. LaBonnte	1	adult	pin	4/13/1967	United States	Nevada	Clark County	Las Vegas				36.20268	-115.2361	WGS1984	16409			Scarites subterraneus Fabricius, 1775	Animalia	Arthropoda	Insecta	Coleoptera	Carabidae	Scarites	subterraneus		Fabricius, 1775
urn:catalog:CAS:ENT:8302840	4/5/2016	https://creativecommons.org/publicdomain/zero/1.0/	http://vertnet.org/resources/norms.html	http://essigdb.berkeley.edu/cgi/eme_query?bnhm_id=CASENT8302840&one=T	CAS	ENT	PreservedSpecimen	CASENT8302840	R.E. Clark	1	adult	pin	5/1/1967	United States	Nevada	Clark County	Las Vegas				36.20268	-115.2361	WGS1984	16409			Scarites subterraneus Fabricius, 1775	Animalia	Arthropoda	Insecta	Coleoptera	Carabidae	Scarites	subterraneus		Fabricius, 1775
urn:catalog:CAS:ENT:8302841	4/5/2016	https://creativecommons.org/publicdomain/zero/1.0/	http://vertnet.org/resources/norms.html	http://essigdb.berkeley.edu/cgi/eme_query?bnhm_id=CASENT8302841&one=T	CAS	ENT	PreservedSpecimen	CASENT8302841	G. Allred	1	adult	pin	5/9/1967	United States	Nevada	Clark County	Las Vegas				36.20268	-115.2361	WGS1984	16409			Scarites subterraneus Fabricius, 1775	Animalia	Arthropoda	Insecta	Coleoptera	Carabidae	Scarites	subterraneus		Fabricius, 1775
urn:catalog:CAS:ENT:8302842	4/5/2016	https://creativecommons.org/publicdomain/zero/1.0/	http://vertnet.org/resources/norms.html	http://essigdb.berkeley.edu/cgi/eme_query?bnhm_id=CASENT8302842&one=T	CAS	ENT	PreservedSpecimen	CASENT8302842	Carol James	1	adult	pin	5/14/1967	United States	Nevada	Clark County					36.17228	-115.15243	WGS1984	140000			Scarites subterraneus Fabricius, 1775	Animalia	Arthropoda	Insecta	Coleoptera	Carabidae	Scarites	subterraneus		Fabricius, 1775
urn:catalog:CAS:ENT:8302843	4/5/2016	https://creativecommons.org/publicdomain/zero/1.0/	http://vertnet.org/resources/norms.html	http://essigdb.berkeley.edu/cgi/eme_query?bnhm_id=CASENT8302843&one=T	CAS	ENT	PreservedSpecimen	CASENT8302843	Anderson Passalidae	1	adult	pin	5/15/1967	United States	Nevada	Clark County	Las Vegas				36.20268	-115.2361	WGS1984	16409			Scarites subterraneus Fabricius, 1775	Animalia	Arthropoda	Insecta	Coleoptera	Carabidae	Scarites	subterraneus		Fabricius, 1775
urn:catalog:CAS:ENT:8302844	4/5/2016	https://creativecommons.org/publicdomain/zero/1.0/	http://vertnet.org/resources/norms.html	http://essigdb.berkeley.edu/cgi/eme_query?bnhm_id=CASENT8302844&one=T	CAS	ENT	PreservedSpecimen	CASENT8302844	C. Keegel	1	adult	pin	4/13/1967	United States	Nevada	Clark County	Las Vegas				36.20268	-115.2361	WGS1984	16409			Scarites subterraneus Fabricius, 1775	Animalia	Arthropoda	Insecta	Coleoptera	Carabidae	Scarites	subterraneus		Fabricius, 1775
urn:catalog:CAS:ENT:8302845	4/5/2016	https://creativecommons.org/publicdomain/zero/1.0/	http://vertnet.org/resources/norms.html	http://essigdb.berkeley.edu/cgi/eme_query?bnhm_id=CASENT8302845&one=T	CAS	ENT	PreservedSpecimen	CASENT8302845	Santolucito	1	adult	pin	11/11/1979	United States	Nevada	Clark County	Las Vegas				36.20268	-115.2361	WGS1984	16409			Scarites subterraneus Fabricius, 1775	Animalia	Arthropoda	Insecta	Coleoptera	Carabidae	Scarites	subterraneus		Fabricius, 1775
urn:catalog:CAS:ENT:8302846	4/5/2016	https://creativecommons.org/publicdomain/zero/1.0/	http://vertnet.org/resources/norms.html	http://essigdb.berkeley.edu/cgi/eme_query?bnhm_id=CASENT8302846&one=T	CAS	ENT	PreservedSpecimen	CASENT8302846	D. M. Anderson	1	adult	pin	9/14/1971	United States	Nevada	Clark County	Las Vegas				36.20268	-115.2361	WGS1984	16409			Scarites subterraneus Fabricius, 1775	Animalia	Arthropoda	Insecta	Coleoptera	Carabidae	Scarites	subterraneus		Fabricius, 1775
[truncated: 104 more rows]
